# Supplementary material for: Identification of Serum miRNA-423-5p Expression Signature in Somatotroph Adenomas
Source: Int J Endocrinol. 2019 Jul 17;2019:8516858. doi: 10.1155/2019/8516858 (PMC6662485; doi:10.1155/2019/8516858)
Supplement: Supplementary Materials — Supplementary Table 1: 169 known miRNAs differently expressed between somatotroph adenomas and healthy pituitary samples; Supplementary Table 2: 169 miRNAs mapped to 6377 mRNAs; Supplementary Table 3: The target mRNAs of hsa-miR-320a and hsa-miR-423-5p; Supplementary Table 4: The target mRNAs of hsa-miR-320a and hsa-miR-423-5p by microarray analysis of somatotroph adenomas and healthy pituitary samples were used to test expression of and proteins of hsa-miR-320a and hsa-miR-423-5p. Supplementary Table 5: The target proteins of hsa-miR-320a and hsa-miR-423-5p by proteomic analysis of somatotroph adenomas and healthy pituitary samples. [file 8516858.f1.xls]

## Sheet: supplementary table 1
169 known miRNAs differently expressed between somatotroph adenomas and healthy pituitary samples
sRNA	somatotroph adenomas	normal pituitary	log2.Fold_change.	Fold_change(______)	p.value	q.value.Storey.et.al..2003.
hsa-let-7b-5p	16010.9	46208.8	-1.5291	0.34649	0	0
hsa-miR-143-3p	6995.06	2220.58	1.6554	3.15011	0	0
hsa-miR-146a-5p	7316.49	2128.21	1.7815	3.43786	0	0
hsa-miR-191-5p	4558.48	1929.37	1.2404	2.36267	0	0
hsa-miR-199a-5p	3884.15	596.515	2.703	6.5114	0	0
hsa-miR-21-5p	62193.6	15369.6	2.0167	4.04654	0	0
hsa-miR-25-3p	11029.8	32396.6	-1.5544	0.340462	0	0
hsa-miR-26a-5p	49356.5	21188.5	1.22	2.3294	0	0
hsa-miR-26b-5p	3009.76	1205.86	1.3196	2.49595	0	0
hsa-miR-27b-3p	3117.66	1308.49	1.2526	2.38265	0	0
hsa-miR-3184-3p	18069.8	91969.8	-2.3476	0.196476	0	0
hsa-miR-320a	5940.86	18746	-1.6578	0.316914	0	0
hsa-miR-340-5p	1728.54	237.323	2.8646	7.28346	0	0
hsa-miR-423-5p	18074.3	91969.8	-2.3472	0.196524	0	0
hsa-miR-451a	110361	342026	-1.6319	0.322668	0	0
hsa-miR-486-3p	19571.3	59818.3	-1.6118	0.32718	0	0
hsa-miR-486-5p	19769.1	60091.5	-1.6039	0.328984	0	0
hsa-miR-199a-3p	1240.77	219.364	2.4998	5.65622	6.12e-285	3.71e-284
hsa-miR-142-3p	1404.86	347.647	2.0147	4.04105	3.56e-274	2.08e-273
hsa-miR-148b-3p	1955.56	795.354	1.2979	2.45873	1.14e-263	6.44e-263
hsa-miR-122-5p	13057.3	28877.8	-1.1451	0.452158	3.47e-234	1.83e-233
hsa-miR-3591-3p	13057.3	28877.8	-1.1451	0.452158	3.47e-234	1.83e-233
hsa-miR-103a-3p	1980.29	941.596	1.0725	2.10312	6.54e-227	3.34e-226
hsa-miR-103b	1962.3	931.334	1.0752	2.10698	2.45e-225	1.22e-224
hsa-miR-744-5p	1180.08	395.111	1.5786	2.9867	8.69e-189	4.18e-188
hsa-miR-221-3p	845.162	284.788	1.5693	2.96769	4.29e-135	1.85e-134
hsa-miR-23a-3p	582.172	105.192	2.4684	5.53438	1.43e-133	6e-133
hsa-miR-182-5p	1193.57	3848.49	-1.689	0.310139	6.13e-120	2.51e-119
hsa-miR-183-5p	543.96	2251.36	-2.0492	0.241614	6.85e-114	2.73e-113
hsa-miR-381-3p	490.014	128.283	1.9335	3.81979	8.18e-94	3.12e-93
hsa-miR-152-3p	476.527	151.374	1.6544	3.14802	1.92e-80	6.99e-80
hsa-miR-144-3p	602.402	262.98	1.1958	2.29068	5.02e-77	1.75e-76
hsa-miR-126-5p	665.34	324.556	1.0356	2.05	2.92e-75	9.97e-75
hsa-miR-1-3p	319.183	89.798	1.8296	3.55446	4.15e-59	1.26e-58
hsa-miR-223-3p	393.36	148.808	1.4024	2.6434	3.59e-58	1.05e-57
hsa-miR-379-5p	269.732	61.5758	2.1311	4.3805	1.52e-56	4.37e-56
hsa-miR-370-3p	348.404	125.717	1.4706	2.77133	8.23e-54	2.28e-53
hsa-miR-224-5p	397.855	170.616	1.2215	2.33187	2.09e-52	5.7e-52
hsa-miR-16-2-3p	1256.5	3199.37	-1.3484	0.392734	1.96e-50	5.09e-50
hsa-miR-3615	150.601	738.909	-2.2947	0.203815	9.2e-49	2.35e-48
hsa-miR-320b	262.989	1016	-1.9498	0.258847	7.57e-47	1.85e-46
hsa-miR-409-3p	218.034	60.2929	1.8545	3.61624	2.24e-41	5.31e-41
hsa-miR-32-5p	202.299	65.4243	1.6286	3.09211	9.95e-35	2.17e-34
hsa-miR-215-5p	141.61	26.9394	2.3941	5.2566	3.73e-33	7.92e-33
hsa-miR-28-5p	139.362	29.5051	2.2398	4.72332	3.71e-31	7.78e-31
hsa-miR-23b-3p	134.866	26.9394	2.3237	5.00628	5.26e-31	1.09e-30
hsa-miR-10a-5p	3337.94	6728.44	-1.0113	0.496094	2.77e-30	5.67e-30
hsa-miR-374b-5p	170.831	57.7273	1.5652	2.95927	1.16e-28	2.27e-28
hsa-miR-374c-3p	170.831	57.7273	1.5652	2.95927	1.16e-28	2.27e-28
hsa-miR-200a-3p	110.141	21.8081	2.3364	5.05045	1.01e-25	1.93e-25
hsa-miR-34c-5p	76.4242	3.84849	4.3117	19.8582	9.95e-25	1.87e-24
hsa-miR-629-5p	487.766	1295.66	-1.4094	0.376462	1.14e-24	2.11e-24
hsa-miR-4433b-3p	116.884	37.202	1.6516	3.14187	5.5e-21	1e-20
hsa-miR-493-5p	78.672	12.8283	2.6165	6.13269	2.81e-20	5e-20
hsa-miR-30b-5p	141.61	59.0101	1.2629	2.39975	2.98e-20	5.24e-20
hsa-miR-133a-3p	105.645	32.0707	1.7199	3.29413	9.95e-20	1.73e-19
hsa-miR-4433a-5p	112.389	37.202	1.595	3.02103	1.07e-19	1.85e-19
hsa-miR-1180-3p	13.4866	143.677	-3.4132	0.0938678	1.92e-19	3.27e-19
hsa-miR-4433a-3p	51.6987	1.28283	5.3327	40.3006	1.56e-17	2.53e-17
hsa-miR-4433b-5p	51.6987	1.28283	5.3327	40.3006	1.56e-17	2.53e-17
hsa-miR-548o-3p	107.893	39.7677	1.4399	2.71308	1.64e-17	2.64e-17
hsa-miR-532-5p	1804.96	3643.23	-1.0133	0.495428	2.87e-17	4.56e-17
hsa-miR-342-5p	197.804	595.232	-1.5894	0.332313	4.79e-17	7.46e-17
hsa-miR-134-5p	114.636	50.0303	1.1962	2.29134	5.35e-16	8.18e-16
hsa-miR-484	125.875	423.333	-1.7498	0.297343	5.78e-16	8.76e-16
hsa-miR-106b-5p	92.1586	32.0707	1.5229	2.87361	7.47e-16	1.12e-15
hsa-miR-127-3p	114.636	52.596	1.124	2.17956	3.04e-15	4.48e-15
hsa-miR-1301-3p	80.9197	25.6566	1.6572	3.15396	4.82e-15	7.04e-15
hsa-miR-4446-3p	87.663	34.6364	1.3397	2.53095	9.97e-14	1.42e-13
hsa-miR-206	76.4242	26.9394	1.5043	2.83689	2.8e-13	3.95e-13
hsa-miR-501-3p	80.9197	291.202	-1.8475	0.277882	5.97e-13	8.35e-13
hsa-miR-24-2-5p	101.15	50.0303	1.0156	2.02177	1.28e-12	1.75e-12
hsa-miR-335-5p	71.9286	25.6566	1.4872	2.80352	1.78e-12	2.42e-12
hsa-miR-339-5p	56.1943	14.1111	1.9936	3.98227	1.87e-12	2.53e-12
hsa-miR-374a-3p	74.1764	28.2222	1.3941	2.6283	3.31e-12	4.45e-12
hsa-miR-548j-3p	33.7166	1.28283	4.7161	26.283	6.28e-12	8.36e-12
hsa-miR-1277-5p	31.4688	2.56566	3.6165	12.2654	1.59e-10	2.09e-10
hsa-miR-889-3p	33.7166	3.84849	3.1311	8.76099	1.69e-10	2.19e-10
hsa-miR-146a-3p	29.221	0	5.8689	#DIV/0!	2.02e-10	2.61e-10
hsa-miR-2110	83.1675	271.96	-1.7093	0.305808	3.26e-10	4.17e-10
hsa-miR-493-3p	69.6809	30.7879	1.1784	2.26326	3.45e-10	4.38e-10
hsa-miR-181d-5p	40.4599	8.9798	2.1717	4.50565	6.35e-10	7.93e-10
hsa-miR-151a-5p	62.9376	26.9394	1.2242	2.33626	1.32e-09	1.63e-09
hsa-miR-769-5p	62.9376	26.9394	1.2242	2.33626	1.32e-09	1.63e-09
hsa-miR-548j-5p	35.9643	7.69697	2.2242	4.67253	4.06e-09	4.96e-09
hsa-miR-27b-5p	44.9554	14.1111	1.6717	3.18582	4.66e-09	5.61e-09
hsa-miR-654-3p	44.9554	14.1111	1.6717	3.18582	4.66e-09	5.61e-09
hsa-miR-136-3p	26.9732	2.56566	3.3941	10.5132	5.36e-09	6.41e-09
hsa-miR-1246	29.221	3.84849	2.9246	7.59286	5.58e-09	6.62e-09
hsa-miR-320c	40.4599	159.071	-1.9751	0.254351	7.75e-09	9.12e-09
hsa-miR-199b-5p	58.442	26.9394	1.1173	2.16939	1.93e-08	2.18e-08
hsa-miR-494-3p	22.4777	1.28283	4.1311	17.522	3.08e-08	3.4e-08
hsa-miR-6852-5p	40.4599	12.8283	1.6572	3.15396	3.07e-08	3.4e-08
hsa-miR-193a-5p	17.9822	93.6465	-2.3807	0.192022	5.95e-08	6.45e-08
hsa-miR-361-5p	35.9643	10.2626	1.8092	3.5044	6.09e-08	6.55e-08
hsa-miR-4732-5p	26.9732	116.737	-2.1137	0.231059	9.06e-08	9.69e-08
hsa-miR-4665-5p	20.2299	0	5.3384	#DIV/0!	9.77e-08	1.04e-07
hsa-miR-335-3p	24.7255	3.84849	2.6836	6.42473	1.82e-07	1.93e-07
hsa-miR-495-3p	38.2121	14.1111	1.4372	2.70794	4.1e-07	4.25e-07
hsa-miR-4326	15.7344	80.8182	-2.3608	0.194689	5.92e-07	6.06e-07
hsa-miR-181a-3p	40.4599	16.6768	1.2787	2.42612	7.25e-07	7.35e-07
hsa-miR-452-5p	22.4777	3.84849	2.5461	5.84066	1.03e-06	1.02e-06
hsa-miR-542-3p	38.2121	15.3939	1.3117	2.48228	1.13e-06	1.11e-06
hsa-miR-193b-5p	2.24777	34.6364	-3.9457	0.0648962	1.41e-06	1.38e-06
hsa-miR-556-5p	15.7344	0	4.9758	#DIV/0!	2.54e-06	2.45e-06
hsa-miR-939-5p	0	25.6566	-5.6813	0	2.54e-06	2.45e-06
hsa-miR-641	22.4777	5.13131	2.1311	4.3805	4.79e-06	4.58e-06
hsa-miR-7706	11.2389	61.5758	-2.4539	0.182521	6e-06	5.71e-06
hsa-miR-214-3p	15.7344	1.28283	3.6165	12.2654	6.11e-06	5.73e-06
hsa-miR-1299	4.49554	39.7677	-3.145	0.113045	7.37e-06	6.82e-06
hsa-miR-218-5p	31.4688	12.8283	1.2946	2.45308	1.12e-05	1.02e-05
hsa-miR-145-5p	13.4866	0	4.7535	#DIV/0!	1.37e-05	1.24e-05
hsa-miR-3120-5p	13.4866	0	4.7535	#DIV/0!	1.37e-05	1.24e-05
hsa-miR-3158-3p	157.344	369.455	-1.2315	0.425882	1.93e-05	1.73e-05
hsa-miR-3158-5p	157.344	369.455	-1.2315	0.425882	1.93e-05	1.73e-05
hsa-miR-21-3p	26.9732	10.2626	1.3941	2.6283	2.68e-05	2.38e-05
hsa-miR-2355-3p	17.9822	3.84849	2.2242	4.67253	3.2e-05	2.75e-05
hsa-miR-411-5p	17.9822	3.84849	2.2242	4.67253	3.2e-05	2.75e-05
hsa-miR-548ah-3p	17.9822	3.84849	2.2242	4.67253	3.2e-05	2.75e-05
hsa-miR-548p	17.9822	3.84849	2.2242	4.67253	3.2e-05	2.75e-05
hsa-miR-328-3p	24.7255	8.9798	1.4612	2.75345	4.08e-05	3.5e-05
hsa-miR-1277-3p	11.2389	0	4.4904	#DIV/0!	7.69e-05	6.49e-05
hsa-miR-4508	11.2389	0	4.4904	#DIV/0!	7.69e-05	6.49e-05
hsa-miR-129-5p	20.2299	6.41414	1.6572	3.15396	9.01e-05	7.57e-05
hsa-miR-1250-5p	11.2389	1.28283	3.1311	8.76099	0.0002262	0.00018512
hsa-miR-127-5p	11.2389	1.28283	3.1311	8.76099	0.0002262	0.00018512
hsa-miR-194-5p	220.281	464.384	-1.076	0.474352	0.00040181	0.00032557
hsa-miR-1273h-3p	17.9822	6.41414	1.4872	2.80352	0.00042287	0.00034095
hsa-miR-147b	8.99108	0	4.1685	#DIV/0!	0.00045435	0.00035753
hsa-miR-200a-5p	8.99108	0	4.1685	#DIV/0!	0.00045435	0.00035753
hsa-miR-429	8.99108	0	4.1685	#DIV/0!	0.00045435	0.00035753
hsa-miR-664a-3p	8.99108	0	4.1685	#DIV/0!	0.00045435	0.00035753
hsa-miR-708-3p	8.99108	0	4.1685	#DIV/0!	0.00045435	0.00035753
hsa-miR-150-3p	22.4777	75.6869	-1.7515	0.296983	0.00061127	0.00047417
hsa-miR-382-3p	15.7344	5.13131	1.6165	3.06635	0.0006327	0.00048848
hsa-miR-132-5p	13.4866	3.84849	1.8092	3.5044	0.00091068	0.0006998
hsa-miR-454-5p	2.24777	20.5253	-3.1908	0.109512	0.0011366	0.00086935
hsa-miR-136-5p	11.2389	2.56566	2.1311	4.3805	0.00122	0.00092878
hsa-miR-6734-5p	0	12.8283	-4.6813	0	0.0015471	0.0011616
hsa-miR-424-3p	24.7255	76.9697	-1.6383	0.321236	0.00162	0.0012108
hsa-miR-363-5p	2.24777	19.2424	-3.0977	0.116813	0.0020452	0.0015216
hsa-miR-1183	6.74331	0	3.7535	#DIV/0!	0.0028492	0.0019845
hsa-miR-1294	11.2389	43.6162	-1.9564	0.257676	0.0027959	0.0019845
hsa-miR-132-3p	6.74331	0	3.7535	#DIV/0!	0.0028492	0.0019845
hsa-miR-3190-5p	6.74331	0	3.7535	#DIV/0!	0.0028492	0.0019845
hsa-miR-3191-3p	6.74331	0	3.7535	#DIV/0!	0.0028492	0.0019845
hsa-miR-3605-5p	4.49554	25.6566	-2.5128	0.17522	0.0028084	0.0019845
hsa-miR-409-5p	6.74331	0	3.7535	#DIV/0!	0.0028492	0.0019845
hsa-miR-619-5p	6.74331	0	3.7535	#DIV/0!	0.0028492	0.0019845
hsa-miR-671-3p	6.74331	0	3.7535	#DIV/0!	0.0028492	0.0019845
hsa-miR-766-3p	6.74331	0	3.7535	#DIV/0!	0.0028492	0.0019845
hsa-miR-214-5p	17.9822	8.9798	1.0018	2.00251	0.0029303	0.0020237
hsa-miR-3120-3p	17.9822	8.9798	1.0018	2.00251	0.0029303	0.0020237
hsa-miR-505-5p	8.99108	37.202	-2.0488	0.241683	0.0035757	0.0024488
hsa-miR-6515-5p	11.2389	3.84849	1.5461	2.92033	0.0045998	0.003124
hsa-miR-3157-3p	0	10.2626	-4.3593	0	0.0059019	0.003959
hsa-miR-4467	0	10.2626	-4.3593	0	0.0059019	0.003959
hsa-miR-1255b-5p	20.2299	61.5758	-1.6059	0.328537	0.0061504	0.0041089
hsa-miR-323a-3p	8.99108	2.56566	1.8092	3.5044	0.0067666	0.0044658
hsa-miR-574-3p	8.99108	2.56566	1.8092	3.5044	0.0067666	0.0044658
hsa-miR-1278	13.4866	6.41414	1.0722	2.10264	0.008006	0.0052207
hsa-miR-181c-3p	13.4866	6.41414	1.0722	2.10264	0.008006	0.0052207
hsa-miR-2115-3p	6.74331	1.28283	2.3941	5.2566	0.0088529	0.0057048
hsa-miR-4797-3p	6.74331	1.28283	2.3941	5.2566	0.0088529	0.0057048
hsa-miR-98-3p	6.74331	1.28283	2.3941	5.2566	0.0088529	0.0057048
hsa-miR-3124-5p	0	8.9798	-4.1667	0	0.011621	0.0073438
hsa-miR-3135a	0	8.9798	-4.1667	0	0.011621	0.0073438
hsa-miR-1285-3p	13.4866	43.6162	-1.6933	0.309211	0.012952	0.0081153
hsa-miR-30c-1-3p	11.2389	5.13131	1.1311	2.19025	0.013256	0.0082496

## Sheet: supplementary table 2
169 miRNAs mapped to 6377 mRNAs
ENSG00000001036	FUCA2
ENSG00000001084	GCLC
ENSG00000001460	STPG1
ENSG00000001461	NIPAL3
ENSG00000001617	SEMA3F
ENSG00000001626	CFTR
ENSG00000001629	ANKIB1
ENSG00000164611	PTTG1
ENSG00000001630	CYP51A1
ENSG00000002330	BAD
ENSG00000002549	LAP3
ENSG00000002587	HS3ST1
ENSG00000002745	WNT16
ENSG00000002822	MAD1L1
ENSG00000002933	TMEM176A
ENSG00000003056	M6PR
ENSG00000003096	KLHL13
ENSG00000003137	CYP26B1
ENSG00000003147	ICA1
ENSG00000003249	DBNDD1
ENSG00000003393	ALS2
ENSG00000003400	CASP10
ENSG00000003402	CFLAR
ENSG00000003436	TFPI
ENSG00000003509	NDUFAF7
ENSG00000003987	MTMR7
ENSG00000003989	SLC7A2
ENSG00000004059	ARF5
ENSG00000004468	CD38
ENSG00000004478	FKBP4
ENSG00000004534	RBM6
ENSG00000004660	CAMKK1
ENSG00000004766	VPS50
ENSG00000004776	HSPB6
ENSG00000004777	ARHGAP33
ENSG00000004779	NDUFAB1
ENSG00000004799	PDK4
ENSG00000004838	ZMYND10
ENSG00000004864	SLC25A13
ENSG00000004866	ST7
ENSG00000004897	CDC27
ENSG00000004939	SLC4A1
ENSG00000004975	DVL2
ENSG00000005001	PRSS22
ENSG00000005007	UPF1
ENSG00000005073	HOXA11
ENSG00000005075	POLR2J
ENSG00000005100	DHX33
ENSG00000005175	RPAP3
ENSG00000005189	AC004381.6
ENSG00000005249	PRKAR2B
ENSG00000005302	MSL3
ENSG00000005339	CREBBP
ENSG00000005379	BZRAP1
ENSG00000005381	MPO
ENSG00000005421	PON1
ENSG00000005483	KMT2E
ENSG00000005486	RHBDD2
ENSG00000005882	PDK2
ENSG00000005884	ITGA3
ENSG00000005889	ZFX
ENSG00000005893	LAMP2
ENSG00000005961	ITGA2B
ENSG00000006025	OSBPL7
ENSG00000006047	YBX2
ENSG00000006071	ABCC8
ENSG00000006116	CACNG3
ENSG00000006118	TMEM132A
ENSG00000006194	ZNF263
ENSG00000006210	CX3CL1
ENSG00000006282	SPATA20
ENSG00000006451	RALA
ENSG00000006453	BAIAP2L1
ENSG00000006468	ETV1
ENSG00000006576	PHTF2
ENSG00000006606	CCL26
ENSG00000006607	FARP2
ENSG00000006625	GGCT
ENSG00000006634	DBF4
ENSG00000006695	COX10
ENSG00000006704	GTF2IRD1
ENSG00000006712	PAF1
ENSG00000006715	VPS41
ENSG00000006740	ARHGAP44
ENSG00000006747	SCIN
ENSG00000006788	MYH13
ENSG00000006837	CDKL3
ENSG00000007001	UPP2
ENSG00000007038	PRSS21
ENSG00000007047	MARK4
ENSG00000007129	CEACAM21
ENSG00000007171	NOS2
ENSG00000007255	TRAPPC6A
ENSG00000007306	CEACAM7
ENSG00000007312	CD79B
ENSG00000007376	RPUSD1
ENSG00000007384	RHBDF1
ENSG00000007392	LUC7L
ENSG00000007402	CACNA2D2
ENSG00000007520	TSR3
ENSG00000007541	PIGQ
ENSG00000007545	CRAMP1
ENSG00000007952	NOX1
ENSG00000008056	SYN1
ENSG00000008118	CAMK1G
ENSG00000008197	TFAP2D
ENSG00000008226	DLEC1
ENSG00000008282	SYPL1
ENSG00000008294	SPAG9
ENSG00000008300	CELSR3
ENSG00000008323	PLEKHG6
ENSG00000008324	SS18L2
ENSG00000008394	MGST1
ENSG00000008405	CRY1
ENSG00000008438	PGLYRP1
ENSG00000008517	IL32
ENSG00000008710	PKD1
ENSG00000008853	RHOBTB2
ENSG00000008869	HEATR5B
ENSG00000008988	RPS20
ENSG00000009307	CSDE1
ENSG00000009765	IYD
ENSG00000009830	POMT2
ENSG00000009950	MLXIPL
ENSG00000010017	RANBP9
ENSG00000010072	SPRTN
ENSG00000010219	DYRK4
ENSG00000010270	STARD3NL
ENSG00000010278	CD9
ENSG00000010310	GIPR
ENSG00000010319	SEMA3G
ENSG00000010361	FUZ
ENSG00000010610	CD4
ENSG00000010626	LRRC23
ENSG00000010671	BTK
ENSG00000010704	HFE
ENSG00000010810	FYN
ENSG00000010818	HIVEP2
ENSG00000011028	MRC2
ENSG00000011083	SLC6A7
ENSG00000011105	TSPAN9
ENSG00000011114	BTBD7
ENSG00000011198	ABHD5
ENSG00000011201	ANOS1
ENSG00000011260	UTP18
ENSG00000011295	TTC19
ENSG00000011347	SYT7
ENSG00000011376	LARS2
ENSG00000011405	PIK3C2A
ENSG00000011422	PLAUR
ENSG00000011426	ANLN
ENSG00000011451	WIZ
ENSG00000011465	DCN
ENSG00000011478	QPCTL
ENSG00000011485	PPP5C
ENSG00000011523	CEP68
ENSG00000011566	MAP4K3
ENSG00000011590	ZBTB32
ENSG00000011600	TYROBP
ENSG00000011638	TMEM159
ENSG00000012061	ERCC1
ENSG00000012124	CD22
ENSG00000012223	LTF
ENSG00000012232	EXTL3
ENSG00000012504	NR1H4
ENSG00000012660	ELOVL5
ENSG00000012822	CALCOCO1
ENSG00000012963	UBR7
ENSG00000012983	MAP4K5
ENSG00000013275	PSMC4
ENSG00000013288	MAN2B2
ENSG00000013293	SLC7A14
ENSG00000013297	CLDN11
ENSG00000013306	SLC25A39
ENSG00000013375	PGM3
ENSG00000013503	POLR3B
ENSG00000013523	ANGEL1
ENSG00000013563	DNASE1L1
ENSG00000013573	DDX11
ENSG00000013583	HEBP1
ENSG00000013588	GPRC5A
ENSG00000013619	MAMLD1
ENSG00000013725	CD6
ENSG00000014138	POLA2
ENSG00000014164	ZC3H3
ENSG00000014216	CAPN1
ENSG00000014641	MDH1
ENSG00000014824	SLC30A9
ENSG00000014919	COX15
ENSG00000015413	DPEP1
ENSG00000015520	NPC1L1
ENSG00000015532	XYLT2
ENSG00000015568	RGPD5
ENSG00000015592	STMN4
ENSG00000016082	ISL1
ENSG00000016864	GLT8D1
ENSG00000017427	IGF1
ENSG00000017797	RALBP1
ENSG00000018189	RUFY3
ENSG00000018280	SLC11A1
ENSG00000018510	AGPS
ENSG00000018869	ZNF582
ENSG00000019186	CYP24A1
ENSG00000019505	SYT13
ENSG00000019549	SNAI2
ENSG00000019582	CD74
ENSG00000019991	HGF
ENSG00000020256	ZFP64
ENSG00000020426	MNAT1
ENSG00000020577	SAMD4A
ENSG00000020633	RUNX3
ENSG00000021300	PLEKHB1
ENSG00000021645	NRXN3
ENSG00000021762	OSBPL5
ENSG00000021776	AQR
ENSG00000021826	CPS1
ENSG00000022277	RTFDC1
ENSG00000022355	GABRA1
ENSG00000022556	NLRP2
ENSG00000022567	SLC45A4
ENSG00000023228	NDUFS1
ENSG00000023287	RB1CC1
ENSG00000023318	ERP44
ENSG00000023330	ALAS1
ENSG00000023445	BIRC3
ENSG00000023516	AKAP11
ENSG00000023608	SNAPC1
ENSG00000024422	EHD2
ENSG00000026025	VIM
ENSG00000026297	RNASET2
ENSG00000026508	CD44
ENSG00000026950	BTN3A1
ENSG00000027847	B4GALT7
ENSG00000028203	VEZT
ENSG00000028528	SNX1
ENSG00000028839	TBPL1
ENSG00000029153	ARNTL2
ENSG00000029364	SLC39A9
ENSG00000029534	ANK1
ENSG00000029559	IBSP
ENSG00000030582	GRN
ENSG00000031003	FAM13B
ENSG00000031081	ARHGAP31
ENSG00000031698	SARS
ENSG00000031823	RANBP3
ENSG00000032444	PNPLA6
ENSG00000033011	ALG1
ENSG00000033050	ABCF2
ENSG00000033100	CHPF2
ENSG00000033122	LRRC7
ENSG00000033627	ATP6V0A1
ENSG00000033800	PIAS1
ENSG00000033867	SLC4A7
ENSG00000034239	EFCAB1
ENSG00000034510	TMSB10
ENSG00000034713	GABARAPL2
ENSG00000034971	MYOC
ENSG00000035141	FAM136A
ENSG00000035403	VCL
ENSG00000035499	DEPDC1B
ENSG00000035664	DAPK2
ENSG00000035681	NSMAF
ENSG00000035720	STAP1
ENSG00000035862	TIMP2
ENSG00000036257	CUL3
ENSG00000036473	OTC
ENSG00000036530	CYP46A1
ENSG00000036565	SLC18A1
ENSG00000036672	USP2
ENSG00000037042	TUBG2
ENSG00000037241	RPL26L1
ENSG00000037280	FLT4
ENSG00000037474	NSUN2
ENSG00000037757	MRI1
ENSG00000037897	METTL1
ENSG00000037965	HOXC8
ENSG00000038002	AGA
ENSG00000038210	PI4K2B
ENSG00000038219	BOD1L1
ENSG00000038295	TLL1
ENSG00000038427	VCAN
ENSG00000038532	CLEC16A
ENSG00000038945	MSR1
ENSG00000039068	CDH1
ENSG00000039123	SKIV2L2
ENSG00000039139	DNAH5
ENSG00000039523	FAM65A
ENSG00000039537	C6
ENSG00000039560	RAI14
ENSG00000039600	SOX30
ENSG00000039987	BEST2
ENSG00000040275	SPDL1
ENSG00000040531	CTNS
ENSG00000040608	RTN4R
ENSG00000040731	CDH10
ENSG00000040933	INPP4A
ENSG00000041353	RAB27B
ENSG00000041357	PSMA4
ENSG00000041515	MYO16
ENSG00000041802	LSG1
ENSG00000041988	THAP3
ENSG00000042062	FAM65C
ENSG00000042304	C2orf83
ENSG00000042429	MED17
ENSG00000042445	RETSAT
ENSG00000042493	CAPG
ENSG00000042753	AP2S1
ENSG00000042832	TG
ENSG00000042980	ADAM28
ENSG00000043093	DCUN1D1
ENSG00000043143	JADE2
ENSG00000043462	LCP2
ENSG00000044090	CUL7
ENSG00000044115	CTNNA1
ENSG00000046604	DSG2
ENSG00000046774	MAGEC2
ENSG00000046889	PREX2
ENSG00000047056	WDR37
ENSG00000047188	YTHDC2
ENSG00000047346	FAM214A
ENSG00000047365	ARAP2
ENSG00000047457	CP
ENSG00000047578	KIAA0556
ENSG00000047621	C12orf4
ENSG00000047648	ARHGAP6
ENSG00000047662	FAM184B
ENSG00000047932	GOPC
ENSG00000048028	USP28
ENSG00000048140	TSPAN17
ENSG00000048392	RRM2B
ENSG00000048405	ZNF800
ENSG00000048462	TNFRSF17
ENSG00000048540	LMO3
ENSG00000048544	MRPS10
ENSG00000048545	GUCA1A
ENSG00000048707	VPS13D
ENSG00000048991	R3HDM1
ENSG00000049130	KITLG
ENSG00000049167	ERCC8
ENSG00000049245	VAMP3
ENSG00000049283	EPN3
ENSG00000049449	RCN1
ENSG00000049540	ELN
ENSG00000049541	RFC2
ENSG00000049759	NEDD4L
ENSG00000049769	PPP1R3F
ENSG00000049860	HEXB
ENSG00000049883	PTCD2
ENSG00000050030	KIAA2022
ENSG00000050130	JKAMP
ENSG00000050327	ARHGEF5
ENSG00000050344	NFE2L3
ENSG00000050426	LETMD1
ENSG00000050628	PTGER3
ENSG00000050730	TNIP3
ENSG00000050820	BCAR1
ENSG00000051009	FAM160A2
ENSG00000051108	HERPUD1
ENSG00000051128	HOMER3
ENSG00000051180	RAD51
ENSG00000051341	POLQ
ENSG00000051596	THOC3
ENSG00000051825	MPHOSPH9
ENSG00000052126	PLEKHA5
ENSG00000052723	SIKE1
ENSG00000052795	FNIP2
ENSG00000052802	MSMO1
ENSG00000052841	TTC17
ENSG00000053108	FSTL4
ENSG00000053254	FOXN3
ENSG00000053371	AKR7A2
ENSG00000053438	NNAT
ENSG00000053747	LAMA3
ENSG00000053770	AP5M1
ENSG00000053918	KCNQ1
ENSG00000054148	PHPT1
ENSG00000054219	LY75
ENSG00000054267	ARID4B
ENSG00000054392	HHAT
ENSG00000054523	KIF1B
ENSG00000054803	CBLN4
ENSG00000054965	FAM168A
ENSG00000054967	RELT
ENSG00000054983	GALC
ENSG00000055118	KCNH2
ENSG00000055332	EIF2AK2
ENSG00000055483	USP36
ENSG00000055609	KMT2C
ENSG00000055950	MRPL43
ENSG00000055955	ITIH4
ENSG00000055957	ITIH1
ENSG00000056097	ZFR
ENSG00000056291	NPFFR2
ENSG00000057294	PKP2
ENSG00000057468	MSH4
ENSG00000057704	TMCC3
ENSG00000057757	PITHD1
ENSG00000058056	USP13
ENSG00000058085	LAMC2
ENSG00000058091	CDK14
ENSG00000058262	SEC61A1
ENSG00000058272	PPP1R12A
ENSG00000058404	CAMK2B
ENSG00000058799	YIPF1
ENSG00000058866	DGKG
ENSG00000059122	FLYWCH1
ENSG00000059145	UNKL
ENSG00000059377	TBXAS1
ENSG00000059378	PARP12
ENSG00000059588	TARBP1
ENSG00000059691	GATB
ENSG00000059728	MXD1
ENSG00000059758	CDK17
ENSG00000059804	SLC2A3
ENSG00000059915	PSD
ENSG00000060069	CTDP1
ENSG00000060138	YBX3
ENSG00000060140	STYK1
ENSG00000060339	CCAR1
ENSG00000060491	OGFR
ENSG00000060558	GNA15
ENSG00000060566	CREB3L3
ENSG00000060642	PIGV
ENSG00000060688	SNRNP40
ENSG00000060709	RIMBP2
ENSG00000060971	ACAA1
ENSG00000060982	BCAT1
ENSG00000061273	HDAC7
ENSG00000061337	LZTS1
ENSG00000061794	MRPS35
ENSG00000061918	GUCY1B3
ENSG00000062038	CDH3
ENSG00000062194	GPBP1
ENSG00000062282	DGAT2
ENSG00000062524	LTK
ENSG00000062650	WAPL
ENSG00000062716	VMP1
ENSG00000062725	APPBP2
ENSG00000063046	EIF4B
ENSG00000063176	SPHK2
ENSG00000063241	ISOC2
ENSG00000063245	EPN1
ENSG00000063515	GSC2
ENSG00000063660	GPC1
ENSG00000063761	ADCK1
ENSG00000064012	CASP8
ENSG00000064042	LIMCH1
ENSG00000064102	ASUN
ENSG00000064199	SPA17
ENSG00000064201	TSPAN32
ENSG00000064205	WISP2
ENSG00000064218	DMRT3
ENSG00000064225	ST3GAL6
ENSG00000064270	ATP2C2
ENSG00000064300	NGFR
ENSG00000064309	CDON
ENSG00000064419	TNPO3
ENSG00000064490	RFXANK
ENSG00000064545	TMEM161A
ENSG00000064601	CTSA
ENSG00000064651	SLC12A2
ENSG00000064652	SNX24
ENSG00000064666	CNN2
ENSG00000064687	ABCA7
ENSG00000064692	SNCAIP
ENSG00000064726	BTBD1
ENSG00000064763	FAR2
ENSG00000065029	ZNF76
ENSG00000065060	UHRF1BP1
ENSG00000065150	IPO5
ENSG00000065268	WDR18
ENSG00000065308	TRAM2
ENSG00000065320	NTN1
ENSG00000065325	GLP2R
ENSG00000065371	ROPN1
ENSG00000065457	ADAT1
ENSG00000065518	NDUFB4
ENSG00000065600	TMEM206
ENSG00000065609	SNAP91
ENSG00000065665	SEC61A2
ENSG00000065675	PRKCQ
ENSG00000065717	TLE2
ENSG00000065802	ASB1
ENSG00000065809	FAM107B
ENSG00000065882	TBC1D1
ENSG00000065883	CDK13
ENSG00000065970	FOXJ2
ENSG00000066027	PPP2R5A
ENSG00000066084	DIP2B
ENSG00000066136	NFYC
ENSG00000066248	NGEF
ENSG00000066336	SPI1
ENSG00000066405	CLDN18
ENSG00000066422	ZBTB11
ENSG00000066455	GOLGA5
ENSG00000066583	ISOC1
ENSG00000066629	EML1
ENSG00000066777	ARFGEF1
ENSG00000066855	MTFR1
ENSG00000066926	FECH
ENSG00000067066	SP100
ENSG00000067113	PLPP1
ENSG00000067141	NEO1
ENSG00000067167	TRAM1
ENSG00000067182	TNFRSF1A
ENSG00000067248	DHX29
ENSG00000067365	METTL22
ENSG00000067369	TP53BP1
ENSG00000067445	TRO
ENSG00000067596	DHX8
ENSG00000067646	ZFY
ENSG00000067715	SYT1
ENSG00000067829	IDH3G
ENSG00000067840	PDZD4
ENSG00000067842	ATP2B3
ENSG00000067955	CBFB
ENSG00000068078	FGFR3
ENSG00000068097	HEATR6
ENSG00000068308	OTUD5
ENSG00000068394	GPKOW
ENSG00000068438	FTSJ1
ENSG00000068489	PRR11
ENSG00000068615	REEP1
ENSG00000068654	POLR1A
ENSG00000068697	LAPTM4A
ENSG00000068784	SRBD1
ENSG00000068903	SIRT2
ENSG00000068912	ERLEC1
ENSG00000068971	PPP2R5B
ENSG00000068976	PYGM
ENSG00000069011	PITX1
ENSG00000069122	ADGRF5
ENSG00000069206	ADAM7
ENSG00000069248	NUP133
ENSG00000069399	BCL3
ENSG00000069424	KCNAB2
ENSG00000069431	ABCC9
ENSG00000069493	CLEC2D
ENSG00000069667	RORA
ENSG00000069696	DRD4
ENSG00000069702	TGFBR3
ENSG00000069943	PIGB
ENSG00000069956	MAPK6
ENSG00000069966	GNB5
ENSG00000069998	CECR5
ENSG00000070010	UFD1L
ENSG00000070018	LRP6
ENSG00000070019	GUCY2C
ENSG00000070047	PHRF1
ENSG00000070087	PFN2
ENSG00000070159	PTPN3
ENSG00000070190	DAPP1
ENSG00000070193	FGF10
ENSG00000070269	TMEM260
ENSG00000070366	SMG6
ENSG00000070388	FGF22
ENSG00000070404	FSTL3
ENSG00000070413	DGCR2
ENSG00000070444	MNT
ENSG00000070495	JMJD6
ENSG00000070501	POLB
ENSG00000070526	ST6GALNAC1
ENSG00000070540	WIPI1
ENSG00000070614	NDST1
ENSG00000070669	ASNS
ENSG00000070718	AP3M2
ENSG00000070729	CNGB1
ENSG00000070731	ST6GALNAC2
ENSG00000070761	CFAP20
ENSG00000070770	CSNK2A2
ENSG00000070882	OSBPL3
ENSG00000070886	EPHA8
ENSG00000070915	SLC12A3
ENSG00000070950	RAD18
ENSG00000070961	ATP2B1
ENSG00000070985	TRPM5
ENSG00000071051	NCK2
ENSG00000071073	MGAT4A
ENSG00000071082	RPL31
ENSG00000071203	MS4A12
ENSG00000071242	RPS6KA2
ENSG00000071246	VASH1
ENSG00000071282	LMCD1
ENSG00000071462	WBSCR22
ENSG00000071539	TRIP13
ENSG00000071564	TCF3
ENSG00000071575	TRIB2
ENSG00000071626	DAZAP1
ENSG00000071655	MBD3
ENSG00000071991	CDH19
ENSG00000071994	PDCD2
ENSG00000072041	SLC6A15
ENSG00000072062	PRKACA
ENSG00000072080	SPP2
ENSG00000072110	ACTN1
ENSG00000072133	RPS6KA6
ENSG00000072135	PTPN18
ENSG00000072201	LNX1
ENSG00000072210	ALDH3A2
ENSG00000072310	SREBF1
ENSG00000072315	TRPC5
ENSG00000072364	AFF4
ENSG00000072415	MPP5
ENSG00000072657	TRHDE
ENSG00000072682	P4HA2
ENSG00000072694	FCGR2B
ENSG00000072756	TRNT1
ENSG00000072786	STK10
ENSG00000072803	FBXW11
ENSG00000072840	EVC
ENSG00000072849	DERL2
ENSG00000072858	SIDT1
ENSG00000072954	TMEM38A
ENSG00000072958	AP1M1
ENSG00000073008	PVR
ENSG00000073050	XRCC1
ENSG00000073060	SCARB1
ENSG00000073111	MCM2
ENSG00000073146	MOV10L1
ENSG00000073150	PANX2
ENSG00000073282	TP63
ENSG00000073331	ALPK1
ENSG00000073350	LLGL2
ENSG00000073417	PDE8A
ENSG00000073578	SDHA
ENSG00000073584	SMARCE1
ENSG00000073598	FNDC8
ENSG00000073670	ADAM11
ENSG00000073711	PPP2R3A
ENSG00000073734	ABCB11
ENSG00000073803	MAP3K13
ENSG00000073849	ST6GAL1
ENSG00000073861	TBX21
ENSG00000074054	CLASP1
ENSG00000074071	MRPS34
ENSG00000074181	NOTCH3
ENSG00000074201	CLNS1A
ENSG00000074219	TEAD2
ENSG00000074266	EED
ENSG00000074276	CDHR2
ENSG00000074319	TSG101
ENSG00000074370	ATP2A3
ENSG00000074410	CA12
ENSG00000074416	MGLL
ENSG00000074590	NUAK1
ENSG00000074621	SLC24A1
ENSG00000074660	SCARF1
ENSG00000074695	LMAN1
ENSG00000074696	HACD3
ENSG00000074706	IPCEF1
ENSG00000074800	ENO1
ENSG00000074842	MYDGF
ENSG00000074855	ANO8
ENSG00000074964	ARHGEF10L
ENSG00000074966	TXK
ENSG00000075089	ACTR6
ENSG00000075131	TIPIN
ENSG00000075142	SRI
ENSG00000075151	EIF4G3
ENSG00000075213	SEMA3A
ENSG00000075223	SEMA3C
ENSG00000075239	ACAT1
ENSG00000075275	CELSR1
ENSG00000075336	TIMM21
ENSG00000075340	ADD2
ENSG00000075388	FGF4
ENSG00000075413	MARK3
ENSG00000075415	SLC25A3
ENSG00000075426	FOSL2
ENSG00000075461	CACNG4
ENSG00000075568	TMEM131
ENSG00000075643	MOCOS
ENSG00000075673	ATP12A
ENSG00000075702	WDR62
ENSG00000075785	RAB7A
ENSG00000075790	BCAP29
ENSG00000075856	SART3
ENSG00000075914	EXOSC7
ENSG00000075975	MKRN2
ENSG00000076003	MCM6
ENSG00000076043	REXO2
ENSG00000076067	RBMS2
ENSG00000076201	PTPN23
ENSG00000076242	MLH1
ENSG00000076248	UNG
ENSG00000076321	KLHL20
ENSG00000076344	RGS11
ENSG00000076513	ANKRD13A
ENSG00000076604	TRAF4
ENSG00000076641	PAG1
ENSG00000076650	GPATCH1
ENSG00000076662	ICAM3
ENSG00000076706	MCAM
ENSG00000076864	RAP1GAP
ENSG00000077009	NMRK2
ENSG00000077044	DGKD
ENSG00000077063	CTTNBP2
ENSG00000077080	ACTL6B
ENSG00000077097	TOP2B
ENSG00000077150	NFKB2
ENSG00000077157	PPP1R12B
ENSG00000077232	DNAJC10
ENSG00000077238	IL4R
ENSG00000077264	PAK3
ENSG00000077312	SNRPA
ENSG00000077348	EXOSC5
ENSG00000077454	LRCH4
ENSG00000077463	SIRT6
ENSG00000077498	TYR
ENSG00000077514	POLD3
ENSG00000077549	CAPZB
ENSG00000077684	JADE1
ENSG00000077713	SLC25A43
ENSG00000077800	FKBP6
ENSG00000078018	MAP2
ENSG00000078061	ARAF
ENSG00000078070	MCCC1
ENSG00000078081	LAMP3
ENSG00000078098	FAP
ENSG00000078124	ACER3
ENSG00000078140	UBE2K
ENSG00000078142	PIK3C3
ENSG00000078177	N4BP2
ENSG00000078237	TIGAR
ENSG00000078328	RBFOX1
ENSG00000078403	MLLT10
ENSG00000078549	ADCYAP1R1
ENSG00000078579	FGF20
ENSG00000078668	VDAC3
ENSG00000078687	TNRC6C
ENSG00000078725	BRINP1
ENSG00000078747	ITCH
ENSG00000078795	PKD2L2
ENSG00000078808	SDF4
ENSG00000078814	MYH7B
ENSG00000078898	BPIFB2
ENSG00000078902	TOLLIP
ENSG00000078967	UBE2D4
ENSG00000079102	RUNX1T1
ENSG00000079112	CDH17
ENSG00000079150	FKBP7
ENSG00000079156	OSBPL6
ENSG00000079215	SLC1A3
ENSG00000079257	LXN
ENSG00000079308	TNS1
ENSG00000079313	REXO1
ENSG00000079385	CEACAM1
ENSG00000079393	DUSP13
ENSG00000079432	CIC
ENSG00000079435	LIPE
ENSG00000079459	FDFT1
ENSG00000079557	AFM
ENSG00000079616	KIF22
ENSG00000079785	DDX1
ENSG00000079841	RIMS1
ENSG00000079999	KEAP1
ENSG00000080031	PTPRH
ENSG00000080189	SLC35C2
ENSG00000080293	SCTR
ENSG00000080345	RIF1
ENSG00000080371	RAB21
ENSG00000080493	SLC4A4
ENSG00000080503	SMARCA2
ENSG00000080561	MID2
ENSG00000080573	COL5A3
ENSG00000080603	SRCAP
ENSG00000080618	CPB2
ENSG00000080709	KCNN2
ENSG00000080819	CPOX
ENSG00000080823	MOK
ENSG00000080824	HSP90AA1
ENSG00000081014	AP4E1
ENSG00000081019	RSBN1
ENSG00000081087	OSTM1
ENSG00000081148	IMPG2
ENSG00000081154	PCNP
ENSG00000081177	EXD2
ENSG00000081181	ARG2
ENSG00000081277	PKP1
ENSG00000081307	UBA5
ENSG00000081320	STK17B
ENSG00000081386	ZNF510
ENSG00000081479	LRP2
ENSG00000081791	KIAA0141
ENSG00000081800	SLC13A1
ENSG00000081803	CADPS2
ENSG00000081818	PCDHB4
ENSG00000081870	HSPB11
ENSG00000081913	PHLPP1
ENSG00000081985	IL12RB2
ENSG00000082014	SMARCD3
ENSG00000082068	WDR70
ENSG00000082146	STRADB
ENSG00000082196	C1QTNF3
ENSG00000082258	CCNT2
ENSG00000082269	FAM135A
ENSG00000082458	DLG3
ENSG00000082512	TRAF5
ENSG00000082515	MRPL22
ENSG00000082516	GEMIN5
ENSG00000082556	OPRK1
ENSG00000082684	SEMA5B
ENSG00000082701	GSK3B
ENSG00000083093	PALB2
ENSG00000083097	DOPEY1
ENSG00000083168	KAT6A
ENSG00000083223	ZCCHC6
ENSG00000083307	GRHL2
ENSG00000083444	PLOD1
ENSG00000083454	P2RX5
ENSG00000083457	ITGAE
ENSG00000083544	TDRD3
ENSG00000083720	OXCT1
ENSG00000083782	EPYC
ENSG00000083799	CYLD
ENSG00000083807	SLC27A5
ENSG00000083812	ZNF324
ENSG00000083817	ZNF416
ENSG00000083844	ZNF264
ENSG00000083937	CHMP2B
ENSG00000084092	NOA1
ENSG00000084110	HAL
ENSG00000084234	APLP2
ENSG00000084444	FAM234B
ENSG00000084453	SLCO1A2
ENSG00000084463	WBP11
ENSG00000084674	APOB
ENSG00000084676	NCOA1
ENSG00000084731	KIF3C
ENSG00000084733	RAB10
ENSG00000084734	GCKR
ENSG00000084764	MAPRE3
ENSG00000084774	CAD
ENSG00000085117	CD82
ENSG00000085185	BCORL1
ENSG00000085276	MECOM
ENSG00000085382	HACE1
ENSG00000085415	SEH1L
ENSG00000085449	WDFY1
ENSG00000085491	SLC25A24
ENSG00000085514	PILRA
ENSG00000085563	ABCB1
ENSG00000085662	AKR1B1
ENSG00000085721	RRN3
ENSG00000085831	TTC39A
ENSG00000085872	CHERP
ENSG00000085982	USP40
ENSG00000086065	CHMP5
ENSG00000086189	DIMT1
ENSG00000086232	EIF2AK1
ENSG00000086288	NME8
ENSG00000086289	EPDR1
ENSG00000086504	MRPL28
ENSG00000086506	HBQ1
ENSG00000086544	ITPKC
ENSG00000086548	CEACAM6
ENSG00000086570	FAT2
ENSG00000086589	RBM22
ENSG00000086598	TMED2
ENSG00000086619	ERO1B
ENSG00000086666	ZFAND6
ENSG00000086696	HSD17B2
ENSG00000086758	HUWE1
ENSG00000086827	ZW10
ENSG00000086991	NOX4
ENSG00000087076	HSD17B14
ENSG00000087077	TRIP6
ENSG00000087085	ACHE
ENSG00000087088	BAX
ENSG00000087111	PIGS
ENSG00000087116	ADAMTS2
ENSG00000087157	PGS1
ENSG00000087237	CETP
ENSG00000087245	MMP2
ENSG00000087250	MT3
ENSG00000087253	LPCAT2
ENSG00000087258	GNAO1
ENSG00000087274	ADD1
ENSG00000087302	C14orf166
ENSG00000087303	NID2
ENSG00000087338	GMCL1
ENSG00000087460	GNAS
ENSG00000087470	DNM1L
ENSG00000087494	PTHLH
ENSG00000087510	TFAP2C
ENSG00000087586	AURKA
ENSG00000087903	RFX2
ENSG00000087995	METTL2A
ENSG00000088035	ALG6
ENSG00000088038	CNOT3
ENSG00000088053	GP6
ENSG00000088179	PTPN4
ENSG00000088205	DDX18
ENSG00000088256	GNA11
ENSG00000088305	DNMT3B
ENSG00000088320	REM1
ENSG00000088325	TPX2
ENSG00000088356	PDRG1
ENSG00000088367	EPB41L1
ENSG00000088448	ANKRD10
ENSG00000088451	TGDS
ENSG00000088538	DOCK3
ENSG00000088682	COQ9
ENSG00000088727	KIF9
ENSG00000088756	ARHGAP28
ENSG00000088808	PPP1R13B
ENSG00000088812	ATRN
ENSG00000088826	SMOX
ENSG00000088833	NSFL1C
ENSG00000088854	C20orf194
ENSG00000088876	ZNF343
ENSG00000088926	F11
ENSG00000088986	DYNLL1
ENSG00000089041	P2RX7
ENSG00000089048	ESF1
ENSG00000089053	ANAPC5
ENSG00000089060	SLC8B1
ENSG00000089063	TMEM230
ENSG00000089091	DZANK1
ENSG00000089101	CFAP61
ENSG00000089116	LHX5
ENSG00000089127	OAS1
ENSG00000089154	GCN1
ENSG00000089159	PXN
ENSG00000089163	SIRT4
ENSG00000089195	TRMT6
ENSG00000089220	PEBP1
ENSG00000089225	TBX5
ENSG00000089248	ERP29
ENSG00000089280	FUS
ENSG00000089558	KCNH4
ENSG00000089639	GMIP
ENSG00000089693	MLF2
ENSG00000089723	OTUB2
ENSG00000089876	DHX32
ENSG00000089902	RCOR1
ENSG00000089916	GPATCH2L
ENSG00000090006	LTBP4
ENSG00000090013	BLVRB
ENSG00000090020	SLC9A1
ENSG00000090054	SPTLC1
ENSG00000090060	PAPOLA
ENSG00000090316	MAEA
ENSG00000090339	ICAM1
ENSG00000090372	STRN4
ENSG00000090376	IRAK3
ENSG00000090382	LYZ
ENSG00000090402	SI
ENSG00000090432	MUL1
ENSG00000090447	TFAP4
ENSG00000090470	PDCD7
ENSG00000090487	SPG21
ENSG00000090512	FETUB
ENSG00000090520	DNAJB11
ENSG00000090534	THPO
ENSG00000090539	CHRD
ENSG00000090554	FLT3LG
ENSG00000090565	RAB11FIP3
ENSG00000090581	GNPTG
ENSG00000090612	ZNF268
ENSG00000090615	GOLGA3
ENSG00000090661	CERS4
ENSG00000090686	USP48
ENSG00000090776	EFNB1
ENSG00000090857	PDPR
ENSG00000090861	AARS
ENSG00000090863	GLG1
ENSG00000090924	PLEKHG2
ENSG00000090932	DLL3
ENSG00000090971	NAT14
ENSG00000090975	PITPNM2
ENSG00000091009	RBM27
ENSG00000091010	POU4F3
ENSG00000091039	OSBPL8
ENSG00000091128	LAMB4
ENSG00000091136	LAMB1
ENSG00000091137	SLC26A4
ENSG00000091140	DLD
ENSG00000091157	WDR7
ENSG00000091164	TXNL1
ENSG00000091181	IL5RA
ENSG00000091262	ABCC6
ENSG00000091317	CMTM6
ENSG00000091409	ITGA6
ENSG00000091490	SEL1L3
ENSG00000091527	CDV3
ENSG00000091536	MYO15A
ENSG00000091592	NLRP1
ENSG00000091622	PITPNM3
ENSG00000091640	SPAG7
ENSG00000091651	ORC6
ENSG00000091664	SLC17A6
ENSG00000091704	CPA1
ENSG00000091831	ESR1
ENSG00000091844	RGS17
ENSG00000091947	TMEM101
ENSG00000091986	CCDC80
ENSG00000092009	CMA1
ENSG00000092010	PSME1
ENSG00000092020	PPP2R3C
ENSG00000092036	HAUS4
ENSG00000092067	CEBPE
ENSG00000092094	OSGEP
ENSG00000092096	SLC22A17
ENSG00000092140	G2E3
ENSG00000092201	SUPT16H
ENSG00000092208	GEMIN2
ENSG00000092295	TGM1
ENSG00000092345	DAZL
ENSG00000092421	SEMA6A
ENSG00000092439	TRPM7
ENSG00000092445	TYRO3
ENSG00000092470	WDR76
ENSG00000092531	SNAP23
ENSG00000092607	TBX15
ENSG00000092850	TEKT2
ENSG00000092853	CLSPN
ENSG00000092929	UNC13D
ENSG00000092964	DPYSL2
ENSG00000093009	CDC45
ENSG00000093010	COMT
ENSG00000093072	CECR1
ENSG00000093134	VNN3
ENSG00000093183	SEC22C
ENSG00000093217	XYLB
ENSG00000094661	OR1I1
ENSG00000094755	GABRP
ENSG00000094796	KRT31
ENSG00000094804	CDC6
ENSG00000094916	CBX5
ENSG00000094963	FMO2
ENSG00000094975	SUCO
ENSG00000095002	MSH2
ENSG00000095059	DHPS
ENSG00000095066	HOOK2
ENSG00000095110	NXPE1
ENSG00000095139	ARCN1
ENSG00000095261	PSMD5
ENSG00000095303	PTGS1
ENSG00000095397	DFNB31
ENSG00000095539	SEMA4G
ENSG00000095564	BTAF1
ENSG00000095585	BLNK
ENSG00000095596	CYP26A1
ENSG00000095627	TDRD1
ENSG00000095637	SORBS1
ENSG00000095752	IL11
ENSG00000095777	MYO3A
ENSG00000095906	NUBP2
ENSG00000095917	TPSD1
ENSG00000095932	SMIM24
ENSG00000096006	CRISP3
ENSG00000096092	TMEM14A
ENSG00000096395	MLN
ENSG00000096654	ZNF184
ENSG00000096717	SIRT1
ENSG00000096746	HNRNPH3
ENSG00000097046	CDC7
ENSG00000099203	TMED1
ENSG00000099250	NRP1
ENSG00000099260	PALMD
ENSG00000099290	FAM21A
ENSG00000099308	MAST3
ENSG00000099326	MZF1
ENSG00000099330	OCEL1
ENSG00000099337	KCNK6
ENSG00000099338	CATSPERG
ENSG00000099341	PSMD8
ENSG00000099365	STX1B
ENSG00000099377	HSD3B7
ENSG00000099381	SETD1A
ENSG00000099385	BCL7C
ENSG00000099617	EFNA2
ENSG00000099624	ATP5D
ENSG00000099625	CBARP
ENSG00000099715	PCDH11Y
ENSG00000099721	AMELY
ENSG00000099769	IGFALS
ENSG00000099785	42796
ENSG00000099797	TECR
ENSG00000099800	TIMM13
ENSG00000099804	CDC34
ENSG00000099812	MISP
ENSG00000099817	POLR2E
ENSG00000099822	HCN2
ENSG00000099860	GADD45B
ENSG00000099864	PALM
ENSG00000099866	MADCAM1
ENSG00000099875	MKNK2
ENSG00000099889	ARVCF
ENSG00000099899	TRMT2A
ENSG00000099917	MED15
ENSG00000099937	SERPIND1
ENSG00000099940	SNAP29
ENSG00000099949	LZTR1
ENSG00000099953	MMP11
ENSG00000099954	CECR2
ENSG00000099956	SMARCB1
ENSG00000099974	DDTL
ENSG00000099985	OSM
ENSG00000099991	CABIN1
ENSG00000099992	TBC1D10A
ENSG00000099995	SF3A1
ENSG00000099998	GGT5
ENSG00000099999	RNF215
ENSG00000100012	SEC14L3
ENSG00000100028	SNRPD3
ENSG00000100030	MAPK1
ENSG00000100031	GGT1
ENSG00000100034	PPM1F
ENSG00000100053	CRYBB3
ENSG00000100055	CYTH4
ENSG00000100056	DGCR14
ENSG00000100065	CARD10
ENSG00000100075	SLC25A1
ENSG00000100078	PLA2G3
ENSG00000100084	HIRA
ENSG00000100095	SEZ6L
ENSG00000100100	PIK3IP1
ENSG00000100104	SRRD
ENSG00000100105	PATZ1
ENSG00000100116	GCAT
ENSG00000100122	CRYBB1
ENSG00000100124	ANKRD54
ENSG00000100138	SNU13
ENSG00000100139	MICALL1
ENSG00000100147	CCDC134
ENSG00000100162	CENPM
ENSG00000100170	SLC5A1
ENSG00000100196	KDELR3
ENSG00000100206	DMC1
ENSG00000100209	HSCB
ENSG00000100211	CBY1
ENSG00000100216	TOMM22
ENSG00000100219	XBP1
ENSG00000100220	RTCB
ENSG00000100221	JOSD1
ENSG00000100225	FBXO7
ENSG00000100226	GTPBP1
ENSG00000100227	POLDIP3
ENSG00000100228	RAB36
ENSG00000100234	TIMP3
ENSG00000100239	PPP6R2
ENSG00000100246	DNAL4
ENSG00000100253	MIOX
ENSG00000100258	LMF2
ENSG00000100263	RHBDD3
ENSG00000100266	PACSIN2
ENSG00000100271	TTLL1
ENSG00000100276	RASL10A
ENSG00000100281	HMGXB4
ENSG00000100285	NEFH
ENSG00000100290	BIK
ENSG00000100292	HMOX1
ENSG00000100294	MCAT
ENSG00000100297	MCM5
ENSG00000100299	ARSA
ENSG00000100302	RASD2
ENSG00000100304	TTLL12
ENSG00000100307	CBX7
ENSG00000100312	ACR
ENSG00000100314	CABP7
ENSG00000100320	RBFOX2
ENSG00000100321	SYNGR1
ENSG00000100324	TAB1
ENSG00000100341	PNPLA5
ENSG00000100344	PNPLA3
ENSG00000100345	MYH9
ENSG00000100348	TXN2
ENSG00000100350	FOXRED2
ENSG00000100353	EIF3D
ENSG00000100359	SGSM3
ENSG00000100362	PVALB
ENSG00000100364	KIAA0930
ENSG00000100368	CSF2RB
ENSG00000100372	SLC25A17
ENSG00000100373	UPK3A
ENSG00000100376	FAM118A
ENSG00000100380	ST13
ENSG00000100385	IL2RB
ENSG00000100387	RBX1
ENSG00000100393	EP300
ENSG00000100395	L3MBTL2
ENSG00000100399	CHADL
ENSG00000100410	PHF5A
ENSG00000100412	ACO2
ENSG00000100417	PMM1
ENSG00000100418	DESI1
ENSG00000100422	CERK
ENSG00000100425	BRD1
ENSG00000100426	ZBED4
ENSG00000100427	MLC1
ENSG00000100429	HDAC10
ENSG00000100439	ABHD4
ENSG00000100441	KHNYN
ENSG00000100442	FKBP3
ENSG00000100448	CTSG
ENSG00000100450	GZMH
ENSG00000100453	GZMB
ENSG00000100462	PRMT5
ENSG00000100473	COCH
ENSG00000100478	AP4S1
ENSG00000100479	POLE2
ENSG00000100485	SOS2
ENSG00000100490	CDKL1
ENSG00000100503	NIN
ENSG00000100504	PYGL
ENSG00000100505	TRIM9
ENSG00000100522	GNPNAT1
ENSG00000100528	CNIH1
ENSG00000100532	CGRRF1
ENSG00000100554	ATP6V1D
ENSG00000100557	C14orf105
ENSG00000100558	PLEK2
ENSG00000100564	PIGH
ENSG00000100565	LRRC74A
ENSG00000100567	PSMA3
ENSG00000100568	VTI1B
ENSG00000100577	GSTZ1
ENSG00000100578	KIAA0586
ENSG00000100580	TMED8
ENSG00000100583	SAMD15
ENSG00000100591	AHSA1
ENSG00000100593	ISM2
ENSG00000100596	SPTLC2
ENSG00000100599	RIN3
ENSG00000100601	ALKBH1
ENSG00000100603	SNW1
ENSG00000100604	CHGA
ENSG00000100605	ITPK1
ENSG00000100612	DHRS7
ENSG00000100625	SIX4
ENSG00000100652	SLC10A1
ENSG00000100664	EIF5
ENSG00000100665	SERPINA4
ENSG00000100678	SLC8A3
ENSG00000100711	ZFYVE21
ENSG00000100714	MTHFD1
ENSG00000100722	ZC3H14
ENSG00000100726	TELO2
ENSG00000100731	PCNX
ENSG00000100749	VRK1
ENSG00000100764	PSMC1
ENSG00000100767	PAPLN
ENSG00000100811	YY1
ENSG00000100813	ACIN1
ENSG00000100823	APEX1
ENSG00000100836	PABPN1
ENSG00000100842	EFS
ENSG00000100865	CINP
ENSG00000100867	DHRS2
ENSG00000100883	SRP54
ENSG00000100889	PCK2
ENSG00000100890	KIAA0391
ENSG00000100902	PSMA6
ENSG00000100906	NFKBIA
ENSG00000100916	BRMS1L
ENSG00000100926	TM9SF1
ENSG00000100934	SEC23A
ENSG00000100941	PNN
ENSG00000100949	RABGGTA
ENSG00000100968	NFATC4
ENSG00000100983	GSS
ENSG00000100991	TRPC4AP
ENSG00000100994	PYGB
ENSG00000101000	PROCR
ENSG00000101003	GINS1
ENSG00000101004	NINL
ENSG00000101040	ZMYND8
ENSG00000101057	MYBL2
ENSG00000101074	R3HDML
ENSG00000101082	SLA2
ENSG00000101104	PABPC1L
ENSG00000101115	SALL4
ENSG00000101134	DOK5
ENSG00000101138	CSTF1
ENSG00000101150	TPD52L2
ENSG00000101160	CTSZ
ENSG00000101162	TUBB1
ENSG00000101187	SLCO4A1
ENSG00000101190	TCFL5
ENSG00000101191	DIDO1
ENSG00000101193	GID8
ENSG00000101197	BIRC7
ENSG00000101210	EEF1A2
ENSG00000101213	PTK6
ENSG00000101216	GMEB2
ENSG00000101220	C20orf27
ENSG00000101224	CDC25B
ENSG00000101230	ISM1
ENSG00000101251	SEL1L2
ENSG00000101255	TRIB3
ENSG00000101266	CSNK2A1
ENSG00000101276	SLC52A3
ENSG00000101282	RSPO4
ENSG00000101307	SIRPB1
ENSG00000101310	SEC23B
ENSG00000101311	FERMT1
ENSG00000101327	PDYN
ENSG00000101331	CCM2L
ENSG00000101336	HCK
ENSG00000101337	TM9SF4
ENSG00000101342	TLDC2
ENSG00000101347	SAMHD1
ENSG00000101384	JAG1
ENSG00000101400	SNTA1
ENSG00000101405	OXT
ENSG00000101417	PXMP4
ENSG00000101421	CHMP4B
ENSG00000101425	BPI
ENSG00000101438	SLC32A1
ENSG00000101441	CST4
ENSG00000101442	ACTR5
ENSG00000101444	AHCY
ENSG00000101445	PPP1R16B
ENSG00000101446	SPINT3
ENSG00000101447	FAM83D
ENSG00000101452	DHX35
ENSG00000101464	PIGU
ENSG00000101474	APMAP
ENSG00000101542	CDH20
ENSG00000101544	ADNP2
ENSG00000101546	RBFA
ENSG00000101557	USP14
ENSG00000101577	LPIN2
ENSG00000101605	MYOM1
ENSG00000101608	MYL12A
ENSG00000101624	CEP76
ENSG00000101654	RNMT
ENSG00000101665	SMAD7
ENSG00000101670	LIPG
ENSG00000101695	RNF125
ENSG00000101745	ANKRD12
ENSG00000101746	NOL4
ENSG00000101751	POLI
ENSG00000101752	MIB1
ENSG00000101825	MXRA5
ENSG00000101842	VSIG1
ENSG00000101843	PSMD10
ENSG00000101846	STS
ENSG00000101849	TBL1X
ENSG00000101856	PGRMC1
ENSG00000101888	NXT2
ENSG00000101892	ATP1B4
ENSG00000101901	ALG13
ENSG00000101916	TLR8
ENSG00000101935	AMMECR1
ENSG00000101940	WDR13
ENSG00000101951	PAGE4
ENSG00000101958	GLRA2
ENSG00000101972	STAG2
ENSG00000101981	F9
ENSG00000101986	ABCD1
ENSG00000102003	SYP
ENSG00000102024	PLS3
ENSG00000102057	KCND1
ENSG00000102078	SLC25A14
ENSG00000102081	FMR1
ENSG00000102098	SCML2
ENSG00000102100	SLC35A2
ENSG00000102109	PCSK1N
ENSG00000102128	RAB40AL
ENSG00000102218	RP2
ENSG00000102226	USP11
ENSG00000102241	HTATSF1
ENSG00000102265	TIMP1
ENSG00000102309	PIN4
ENSG00000102313	ITIH6
ENSG00000102362	SYTL4
ENSG00000102452	NALCN
ENSG00000102471	NDFIP2
ENSG00000102543	CDADC1
ENSG00000102575	ACP5
ENSG00000102606	ARHGEF7
ENSG00000102683	SGCG
ENSG00000102753	KPNA3
ENSG00000102780	DGKH
ENSG00000102786	INTS6
ENSG00000102796	DHRS12
ENSG00000102804	TSC22D1
ENSG00000102837	OLFM4
ENSG00000102858	MGRN1
ENSG00000102870	ZNF629
ENSG00000102879	CORO1A
ENSG00000102882	MAPK3
ENSG00000102893	PHKB
ENSG00000102897	LYRM1
ENSG00000102898	NUTF2
ENSG00000102910	LONP2
ENSG00000102921	N4BP1
ENSG00000102924	CBLN1
ENSG00000102931	ARL2BP
ENSG00000102934	PLLP
ENSG00000102935	ZNF423
ENSG00000102962	CCL22
ENSG00000102967	DHODH
ENSG00000102970	CCL17
ENSG00000102974	CTCF
ENSG00000102978	POLR2C
ENSG00000102981	PARD6A
ENSG00000102984	ZNF821
ENSG00000102996	MMP15
ENSG00000103005	USB1
ENSG00000103021	CCDC113
ENSG00000103023	PRSS54
ENSG00000103024	NME3
ENSG00000103034	NDRG4
ENSG00000103035	PSMD7
ENSG00000103037	SETD6
ENSG00000103042	SLC38A7
ENSG00000103043	VAC14
ENSG00000103044	HAS3
ENSG00000103047	TANGO6
ENSG00000103056	SMPD3
ENSG00000103061	SLC7A6OS
ENSG00000103064	SLC7A6
ENSG00000103066	PLA2G15
ENSG00000103089	FA2H
ENSG00000103091	WDR59
ENSG00000103111	MON1B
ENSG00000103121	CMC2
ENSG00000103126	AXIN1
ENSG00000103145	HCFC1R1
ENSG00000103150	MLYCD
ENSG00000103160	HSDL1
ENSG00000103174	NAGPA
ENSG00000103175	WFDC1
ENSG00000103184	SEC14L5
ENSG00000103187	COTL1
ENSG00000103194	USP10
ENSG00000103196	CRISPLD2
ENSG00000103197	TSC2
ENSG00000103199	ZNF500
ENSG00000103202	NME4
ENSG00000103227	LMF1
ENSG00000103241	FOXF1
ENSG00000103245	NARFL
ENSG00000103249	CLCN7
ENSG00000103257	SLC7A5
ENSG00000103260	METRN
ENSG00000103266	STUB1
ENSG00000103274	NUBP1
ENSG00000103313	MEFV
ENSG00000103316	CRYM
ENSG00000103319	EEF2K
ENSG00000103326	CAPN15
ENSG00000103335	PIEZO1
ENSG00000103375	AQP8
ENSG00000103381	CPPED1
ENSG00000103404	USP31
ENSG00000103415	HMOX2
ENSG00000103423	DNAJA3
ENSG00000103429	BFAR
ENSG00000103449	SALL1
ENSG00000103460	TOX3
ENSG00000103479	RBL2
ENSG00000103489	XYLT1
ENSG00000103490	PYCARD
ENSG00000103494	RPGRIP1L
ENSG00000103495	MAZ
ENSG00000103502	CDIPT
ENSG00000103507	BCKDK
ENSG00000103510	KAT8
ENSG00000103534	TMC5
ENSG00000103544	C16orf62
ENSG00000103546	SLC6A2
ENSG00000103550	KNOP1
ENSG00000103569	AQP9
ENSG00000103591	AAGAB
ENSG00000103642	LACTB
ENSG00000103647	CORO2B
ENSG00000103653	CSK
ENSG00000103671	TRIP4
ENSG00000103707	MTFMT
ENSG00000103710	RASL12
ENSG00000103723	AP3B2
ENSG00000103740	ACSBG1
ENSG00000103769	RAB11A
ENSG00000103811	CTSH
ENSG00000103852	TTC23
ENSG00000103876	FAH
ENSG00000103888	CEMIP
ENSG00000103966	EHD4
ENSG00000103994	ZNF106
ENSG00000104047	DTWD1
ENSG00000104055	TGM5
ENSG00000104059	FAM189A1
ENSG00000104064	GABPB1
ENSG00000104093	DMXL2
ENSG00000104112	SCG3
ENSG00000104129	DNAJC17
ENSG00000104131	EIF3J
ENSG00000104133	SPG11
ENSG00000104140	RHOV
ENSG00000104142	VPS18
ENSG00000104147	OIP5
ENSG00000104154	SLC30A4
ENSG00000104164	BLOC1S6
ENSG00000104213	PDGFRL
ENSG00000104218	CSPP1
ENSG00000104219	ZDHHC2
ENSG00000104221	BRF2
ENSG00000104231	ZFAND1
ENSG00000104237	RP1
ENSG00000104290	FZD3
ENSG00000104312	RIPK2
ENSG00000104313	EYA1
ENSG00000104320	NBN
ENSG00000104321	TRPA1
ENSG00000104324	CPQ
ENSG00000104327	CALB1
ENSG00000104331	IMPAD1
ENSG00000104332	SFRP1
ENSG00000104368	PLAT
ENSG00000104381	GDAP1
ENSG00000104388	RAB2A
ENSG00000104408	EIF3E
ENSG00000104412	EMC2
ENSG00000104415	WISP1
ENSG00000104427	ZC2HC1A
ENSG00000104432	IL7
ENSG00000104435	STMN2
ENSG00000104447	TRPS1
ENSG00000104450	SPAG1
ENSG00000104472	CHRAC1
ENSG00000104490	NCALD
ENSG00000104499	GML
ENSG00000104517	UBR5
ENSG00000104518	GSDMD
ENSG00000104524	PYCRL
ENSG00000104537	ANXA13
ENSG00000104549	SQLE
ENSG00000104611	SH2D4A
ENSG00000104626	ERI1
ENSG00000104635	SLC39A14
ENSG00000104643	MTMR9
ENSG00000104671	DCTN6
ENSG00000104679	R3HCC1
ENSG00000104687	GSR
ENSG00000104689	TNFRSF10A
ENSG00000104691	UBXN8
ENSG00000104695	PPP2CB
ENSG00000104714	ERICH1
ENSG00000104722	NEFM
ENSG00000104731	KLHDC4
ENSG00000104738	MCM4
ENSG00000104755	ADAM2
ENSG00000104756	KCTD9
ENSG00000104763	ASAH1
ENSG00000104774	MAN2B1
ENSG00000104783	KCNN4
ENSG00000104812	GYS1
ENSG00000104823	ECH1
ENSG00000104824	HNRNPL
ENSG00000104826	LHB
ENSG00000104833	TUBB4A
ENSG00000104835	SARS2
ENSG00000104848	KCNA7
ENSG00000104852	SNRNP70
ENSG00000104856	RELB
ENSG00000104859	CLASRP
ENSG00000104863	LIN7B
ENSG00000104866	PPP1R37
ENSG00000104870	FCGRT
ENSG00000104879	CKM
ENSG00000104883	PEX11G
ENSG00000104888	SLC17A7
ENSG00000104889	RNASEH2A
ENSG00000104897	SF3A2
ENSG00000104899	AMH
ENSG00000104901	DKKL1
ENSG00000104903	LYL1
ENSG00000104915	STX10
ENSG00000104938	CLEC4M
ENSG00000104941	RSPH6A
ENSG00000104946	TBC1D17
ENSG00000104957	CCDC130
ENSG00000104964	AES
ENSG00000104967	NOVA2
ENSG00000104969	SGTA
ENSG00000104970	KIR3DX1
ENSG00000104974	LILRA1
ENSG00000104976	SNAPC2
ENSG00000104979	C19orf53
ENSG00000104980	TIMM44
ENSG00000104998	IL27RA
ENSG00000105011	ASF1B
ENSG00000105058	FAM32A
ENSG00000105072	C19orf44
ENSG00000105085	MED26
ENSG00000105088	OLFM2
ENSG00000105127	AKAP8
ENSG00000105131	EPHX3
ENSG00000105135	ILVBL
ENSG00000105136	ZNF419
ENSG00000105146	AURKC
ENSG00000105171	POP4
ENSG00000105173	CCNE1
ENSG00000105185	PDCD5
ENSG00000105198	LGALS13
ENSG00000105202	FBL
ENSG00000105205	CLC
ENSG00000105219	CNTD2
ENSG00000105229	PIAS4
ENSG00000105245	NUMBL
ENSG00000105246	EBI3
ENSG00000105248	CCDC94
ENSG00000105254	TBCB
ENSG00000105255	FSD1
ENSG00000105278	ZFR2
ENSG00000105290	APLP1
ENSG00000105298	CACTIN
ENSG00000105321	CCDC9
ENSG00000105323	HNRNPUL1
ENSG00000105329	TGFB1
ENSG00000105339	DENND3
ENSG00000105341	ATP5SL
ENSG00000105352	CEACAM4
ENSG00000105355	PLIN3
ENSG00000105357	MYH14
ENSG00000105369	CD79A
ENSG00000105370	LIM2
ENSG00000105374	NKG7
ENSG00000105376	ICAM5
ENSG00000105383	CD33
ENSG00000105388	CEACAM5
ENSG00000105392	CRX
ENSG00000105397	TYK2
ENSG00000105398	SULT2A1
ENSG00000105401	CDC37
ENSG00000105402	NAPA
ENSG00000105404	RABAC1
ENSG00000105409	ATP1A3
ENSG00000105426	PTPRS
ENSG00000105427	CNFN
ENSG00000105428	ZNRF4
ENSG00000105429	MEGF8
ENSG00000105447	GRWD1
ENSG00000105464	GRIN2D
ENSG00000105472	CLEC11A
ENSG00000105486	LIG1
ENSG00000105497	ZNF175
ENSG00000105507	CABP5
ENSG00000105509	HAS1
ENSG00000105514	RAB3D
ENSG00000105516	DBP
ENSG00000105520	PLPPR2
ENSG00000105523	FAM83E
ENSG00000105550	FGF21
ENSG00000105556	MIER2
ENSG00000105583	WDR83OS
ENSG00000105605	CACNG7
ENSG00000105607	GCDH
ENSG00000105610	KLF1
ENSG00000105612	DNASE2
ENSG00000105613	MAST1
ENSG00000105617	LENG1
ENSG00000105641	SLC5A5
ENSG00000105642	KCNN1
ENSG00000105643	ARRDC2
ENSG00000105647	PIK3R2
ENSG00000105649	RAB3A
ENSG00000105650	PDE4C
ENSG00000105656	ELL
ENSG00000105664	COMP
ENSG00000105668	UPK1A
ENSG00000105669	COPE
ENSG00000105671	DDX49
ENSG00000105675	ATP4A
ENSG00000105676	ARMC6
ENSG00000105677	TMEM147
ENSG00000105679	GAPDHS
ENSG00000105696	TMEM59L
ENSG00000105697	HAMP
ENSG00000105698	USF2
ENSG00000105700	KXD1
ENSG00000105701	FKBP8
ENSG00000105705	SUGP1
ENSG00000105707	HPN
ENSG00000105711	SCN1B
ENSG00000105717	PBX4
ENSG00000105722	ERF
ENSG00000105723	GSK3A
ENSG00000105732	ZNF574
ENSG00000105737	GRIK5
ENSG00000105738	SIPA1L3
ENSG00000105750	ZNF85
ENSG00000105767	CADM4
ENSG00000105793	GTPBP10
ENSG00000105808	RASA4
ENSG00000105810	CDK6
ENSG00000105819	PMPCB
ENSG00000105825	TFPI2
ENSG00000105829	BET1
ENSG00000105835	NAMPT
ENSG00000105849	TWISTNB
ENSG00000105854	PON2
ENSG00000105855	ITGB8
ENSG00000105856	HBP1
ENSG00000105865	DUS4L
ENSG00000105866	SP4
ENSG00000105879	CBLL1
ENSG00000105880	DLX5
ENSG00000105926	MPP6
ENSG00000105929	ATP6V0A4
ENSG00000105939	ZC3HAV1
ENSG00000105953	OGDH
ENSG00000105954	NPVF
ENSG00000105963	ADAP1
ENSG00000105967	TFEC
ENSG00000105968	H2AFV
ENSG00000105971	CAV2
ENSG00000105989	WNT2
ENSG00000105993	DNAJB6
ENSG00000106003	LFNG
ENSG00000106004	HOXA5
ENSG00000106006	HOXA6
ENSG00000106018	VIPR2
ENSG00000106025	TSPAN12
ENSG00000106028	SSBP1
ENSG00000106031	HOXA13
ENSG00000106034	CPED1
ENSG00000106038	EVX1
ENSG00000106049	HIBADH
ENSG00000106066	CPVL
ENSG00000106069	CHN2
ENSG00000106077	ABHD11
ENSG00000106078	COBL
ENSG00000106080	FKBP14
ENSG00000106086	PLEKHA8
ENSG00000106089	STX1A
ENSG00000106100	NOD1
ENSG00000106125	FAM188B
ENSG00000106144	CASP2
ENSG00000106178	CCL24
ENSG00000106211	HSPB1
ENSG00000106236	NPTX2
ENSG00000106245	BUD31
ENSG00000106266	SNX8
ENSG00000106299	WASL
ENSG00000106302	HYAL4
ENSG00000106305	AIMP2
ENSG00000106327	TFR2
ENSG00000106328	FSCN3
ENSG00000106330	MOSPD3
ENSG00000106333	PCOLCE
ENSG00000106336	FBXO24
ENSG00000106344	RBM28
ENSG00000106351	AGFG2
ENSG00000106355	LSM5
ENSG00000106366	SERPINE1
ENSG00000106384	MOGAT3
ENSG00000106392	C1GALT1
ENSG00000106399	RPA3
ENSG00000106400	ZNHIT1
ENSG00000106404	CLDN15
ENSG00000106415	GLCCI1
ENSG00000106436	MYL10
ENSG00000106459	NRF1
ENSG00000106477	CEP41
ENSG00000106479	ZNF862
ENSG00000106484	MEST
ENSG00000106511	MEOX2
ENSG00000106524	ANKMY2
ENSG00000106526	ACTR3C
ENSG00000106537	TSPAN13
ENSG00000106538	RARRES2
ENSG00000106546	AHR
ENSG00000106554	CHCHD3
ENSG00000106560	GIMAP2
ENSG00000106588	PSMA2
ENSG00000106591	MRPL32
ENSG00000106603	COA1
ENSG00000106605	BLVRA
ENSG00000106615	RHEB
ENSG00000106617	PRKAG2
ENSG00000106624	AEBP1
ENSG00000106635	BCL7B
ENSG00000106636	YKT6
ENSG00000106665	CLIP2
ENSG00000106682	EIF4H
ENSG00000106688	SLC1A1
ENSG00000106692	FKTN
ENSG00000106772	PRUNE2
ENSG00000106803	SEC61B
ENSG00000106804	C5
ENSG00000106809	OGN
ENSG00000106829	TLE4
ENSG00000106927	AMBP
ENSG00000106948	AKNA
ENSG00000106952	TNFSF8
ENSG00000107020	PLGRKT
ENSG00000107021	TBC1D13
ENSG00000107036	RIC1
ENSG00000107105	ELAVL2
ENSG00000107147	KCNT1
ENSG00000107223	EDF1
ENSG00000107242	PIP5K1B
ENSG00000107282	APBA1
ENSG00000107290	SETX
ENSG00000107331	ABCA2
ENSG00000107341	UBE2R2
ENSG00000107372	ZFAND5
ENSG00000107443	CCNJ
ENSG00000107537	PHYH
ENSG00000107669	ATE1
ENSG00000107719	PALD1
ENSG00000107736	CDH23
ENSG00000107771	CCSER2
ENSG00000107796	ACTA2
ENSG00000107819	SFXN3
ENSG00000107864	CPEB3
ENSG00000107872	FBXL15
ENSG00000107949	BCCIP
ENSG00000107951	MTPAP
ENSG00000107959	PITRM1
ENSG00000107960	OBFC1
ENSG00000107968	MAP3K8
ENSG00000108018	SORCS1
ENSG00000108061	SHOC2
ENSG00000108091	CCDC6
ENSG00000108100	CCNY
ENSG00000108106	UBE2S
ENSG00000108176	DNAJC12
ENSG00000108179	PPIF
ENSG00000108187	PBLD
ENSG00000108239	TBC1D12
ENSG00000108242	CYP2C18
ENSG00000108244	KRT23
ENSG00000108255	CRYBA1
ENSG00000108256	NUFIP2
ENSG00000108262	GIT1
ENSG00000108306	FBXL20
ENSG00000108309	RUNDC3A
ENSG00000108342	CSF3
ENSG00000108344	PSMD3
ENSG00000108349	CASC3
ENSG00000108352	RAPGEFL1
ENSG00000108370	RGS9
ENSG00000108379	WNT3
ENSG00000108381	ASPA
ENSG00000108395	TRIM37
ENSG00000108405	P2RX1
ENSG00000108406	DHX40
ENSG00000108417	KRT37
ENSG00000108424	KPNB1
ENSG00000108433	GOSR2
ENSG00000108439	PNPO
ENSG00000108443	RPS6KB1
ENSG00000108468	CBX1
ENSG00000108474	PIGL
ENSG00000108479	GALK1
ENSG00000108506	INTS2
ENSG00000108511	HOXB6
ENSG00000108518	PFN1
ENSG00000108523	RNF167
ENSG00000108528	SLC25A11
ENSG00000108551	RASD1
ENSG00000108556	CHRNE
ENSG00000108559	NUP88
ENSG00000108561	C1QBP
ENSG00000108576	SLC6A4
ENSG00000108578	BLMH
ENSG00000108582	CPD
ENSG00000108587	GOSR1
ENSG00000108588	CCDC47
ENSG00000108590	MED31
ENSG00000108591	DRG2
ENSG00000108599	AKAP10
ENSG00000108602	ALDH3A1
ENSG00000108604	SMARCD2
ENSG00000108639	SYNGR2
ENSG00000108641	B9D1
ENSG00000108651	UTP6
ENSG00000108654	DDX5
ENSG00000108666	C17orf75
ENSG00000108671	PSMD11
ENSG00000108679	LGALS3BP
ENSG00000108684	ASIC2
ENSG00000108691	CCL2
ENSG00000108702	CCL1
ENSG00000108733	PEX12
ENSG00000108759	KRT32
ENSG00000108771	DHX58
ENSG00000108773	KAT2A
ENSG00000108784	NAGLU
ENSG00000108786	HSD17B1
ENSG00000108788	MLX
ENSG00000108797	CNTNAP1
ENSG00000108798	ABI3
ENSG00000108813	DLX4
ENSG00000108821	COL1A1
ENSG00000108823	SGCA
ENSG00000108826	MRPL27
ENSG00000108829	LRRC59
ENSG00000108839	ALOX12
ENSG00000108840	HDAC5
ENSG00000108848	LUC7L3
ENSG00000108852	MPP2
ENSG00000108854	SMURF2
ENSG00000108861	DUSP3
ENSG00000108878	CACNG1
ENSG00000108924	HLF
ENSG00000108947	EFNB3
ENSG00000108953	YWHAE
ENSG00000108960	MMD
ENSG00000108961	RANGRF
ENSG00000108963	DPH1
ENSG00000109046	WSB1
ENSG00000109047	RCVRN
ENSG00000109061	MYH1
ENSG00000109062	SLC9A3R1
ENSG00000109072	VTN
ENSG00000109079	TNFAIP1
ENSG00000109084	TMEM97
ENSG00000109101	FOXN1
ENSG00000109103	UNC119
ENSG00000109107	ALDOC
ENSG00000109118	PHF12
ENSG00000109132	PHOX2B
ENSG00000109133	TMEM33
ENSG00000109158	GABRA4
ENSG00000109163	GNRHR
ENSG00000109171	SLAIN2
ENSG00000109180	OCIAD1
ENSG00000109181	UGT2B10
ENSG00000109193	SULT1E1
ENSG00000109208	SMR3A
ENSG00000109220	CHIC2
ENSG00000109270	LAMTOR3
ENSG00000109320	NFKB1
ENSG00000109323	MANBA
ENSG00000109339	MAPK10
ENSG00000109424	UCP1
ENSG00000109445	ZNF330
ENSG00000109452	INPP4B
ENSG00000109458	GAB1
ENSG00000109466	KLHL2
ENSG00000109471	IL2
ENSG00000109501	WFS1
ENSG00000109519	GRPEL1
ENSG00000109534	GAR1
ENSG00000109536	FRG1
ENSG00000109586	GALNT7
ENSG00000109667	SLC2A9
ENSG00000109670	FBXW7
ENSG00000109674	NEIL3
ENSG00000109680	TBC1D19
ENSG00000109684	CLNK
ENSG00000109685	WHSC1
ENSG00000109686	SH3D19
ENSG00000109738	GLRB
ENSG00000109743	BST1
ENSG00000109756	RAPGEF2
ENSG00000109762	SNX25
ENSG00000109775	UFSP2
ENSG00000109787	KLF3
ENSG00000109790	KLHL5
ENSG00000109794	FAM149A
ENSG00000109805	NCAPG
ENSG00000109819	PPARGC1A
ENSG00000109832	DDX25
ENSG00000109846	CRYAB
ENSG00000109861	CTSC
ENSG00000109917	ZPR1
ENSG00000109919	MTCH2
ENSG00000109920	FNBP4
ENSG00000109929	SC5D
ENSG00000109943	CRTAM
ENSG00000109944	C11orf63
ENSG00000109971	HSPA8
ENSG00000109991	P2RX3
ENSG00000110013	SIAE
ENSG00000110042	DTX4
ENSG00000110048	OSBP
ENSG00000110057	UNC93B1
ENSG00000110060	PUS3
ENSG00000110066	KMT5B
ENSG00000110074	FOXRED1
ENSG00000110075	PPP6R3
ENSG00000110076	NRXN2
ENSG00000110080	ST3GAL4
ENSG00000110090	CPT1A
ENSG00000110092	CCND1
ENSG00000110104	CCDC86
ENSG00000110107	PRPF19
ENSG00000110108	TMEM109
ENSG00000110195	FOLR1
ENSG00000110200	ANAPC15
ENSG00000110218	PANX1
ENSG00000110237	ARHGEF17
ENSG00000110243	APOA5
ENSG00000110245	APOC3
ENSG00000110274	CEP164
ENSG00000110315	RNF141
ENSG00000110318	CEP126
ENSG00000110324	IL10RA
ENSG00000110328	GALNT18
ENSG00000110330	BIRC2
[truncated: 4,379 more rows]

## Sheet: supplementary table 3
The target mRNAs of hsa-miR-320a and hsa-miR-423-5p
hsa-miR-320a			gene name
	ENST00000286175	ENSG00000240344	PPIL3
	ENST00000243893	ENSG00000175063	UBE2C
	ENST00000262545	ENSG00000125851	PCSK2
	ENST00000264156	ENSG00000076003	MCM6
	ENST00000252087	ENSG00000240764	PCDHGC5
	ENST00000216297	ENSG00000092201	SUPT16H
	ENST00000262648	ENSG00000011201	ANOS1
	ENST00000263960	ENSG00000115520	COQ10B
	ENST00000225805	ENSG00000108666	C17orf75
	ENST00000308580	ENSG00000138594	TMOD3
	ENST00000260926	ENSG00000119042	SATB2
	ENST00000239367	ENSG00000120256	LRP11
	ENST00000265993	ENSG00000119977	TCTN3
	ENST00000254663	ENSG00000132330	SCLY
	ENST00000256678	ENSG00000134283	PPHLN1
	ENST00000252992	ENSG00000130695	CEP85
	ENST00000287546	ENSG00000156931	VPS8
	ENST00000307885	ENSG00000174233	ADCY6
	ENST00000158771	ENSG00000072849	DERL2
	ENST00000303025	ENSG00000047648	ARHGAP6
	ENST00000263409	ENSG00000113594	LIFR
	ENST00000279242	ENSG00000149792	MRPL49
	ENST00000271732	ENSG00000143457	GOLPH3L
	ENST00000246024	ENSG00000125827	TMX4
	ENST00000273067	ENSG00000144583	42798
	ENST00000244777	ENSG00000188428	BLOC1S5
	ENST00000219611	ENSG00000103326	CAPN15
	ENST00000264380	ENSG00000115020	PIKFYVE
	ENST00000273986	ENSG00000145354	CISD2
	ENST00000301887	ENSG00000168062	BATF2
	ENST00000251630	ENSG00000104213	PDGFRL
	ENST00000266069	ENSG00000101193	GID8
	ENST00000222690	ENSG00000105968	H2AFV
	ENST00000299335	ENSG00000166260	COX11
	ENST00000247178	ENSG00000126775	ATG14
	ENST00000244769	ENSG00000124788	ATXN1
	ENST00000252799	ENSG00000169955	ZNF747
	ENST00000156825	ENSG00000071655	MBD3
	ENST00000303915	ENSG00000166526	ZNF3
	ENST00000262031	ENSG00000076067	RBMS2
	ENST00000276079	ENSG00000147140	NONO
	ENST00000225519	ENSG00000197417	SHPK
	ENST00000283256	ENSG00000136531	SCN2A
	ENST00000306851	ENSG00000118276	B4GALT6
	ENST00000260323	ENSG00000137766	UNC13C
	ENST00000309007	ENSG00000113758	DBN1
	ENST00000265662	ENSG00000107331	ABCA2
	ENST00000009530	ENSG00000019582	CD74
	ENST00000218004	ENSG00000101888	NXT2
	ENST00000242728	ENSG00000123095	BHLHE41
	ENST00000052569	ENSG00000047932	GOPC
	ENST00000012134	ENSG00000010818	HIVEP2
	ENST00000252744	ENSG00000130449	ZSWIM6
	ENST00000229314	ENSG00000111711	GOLT1B
	ENST00000309235	ENSG00000173258	ZNF483
	ENST00000306601	ENSG00000171163	ZNF692
	ENST00000216420	ENSG00000100532	CGRRF1
	ENST00000275223	ENSG00000093134	VNN3
	ENST00000262394	ENSG00000109046	WSB1
	ENST00000264192	ENSG00000115165	CYTIP
	ENST00000256951	ENSG00000134531	EMP1
	ENST00000256413	ENSG00000134030	CTIF
	ENST00000260379	ENSG00000137818	RPLP1
	ENST00000262815	ENSG00000129933	MAU2
	ENST00000256015	ENSG00000133639	BTG1
	ENST00000238831	ENSG00000119820	YIPF4
	ENST00000263545	ENSG00000146963	LUC7L2
	ENST00000261509	ENSG00000129116	PALLD
	ENST00000252723	ENSG00000130427	EPO
	ENST00000216832	ENSG00000100941	PNN
	ENST00000257527	ENSG00000135074	ADAM19
	ENST00000253754	ENSG00000131435	PDLIM4
	ENST00000265333	ENSG00000213585	VDAC1
	ENST00000264852	ENSG00000072858	SIDT1
	ENST00000263966	ENSG00000058056	USP13
	ENST00000262305	ENSG00000090565	RAB11FIP3
	ENST00000241274	ENSG00000121871	SLITRK3
	ENST00000263733	ENSG00000116199	FAM20B
	ENST00000247226	ENSG00000126822	PLEKHG3
	ENST00000238081	ENSG00000134308	YWHAQ
	ENST00000302779	ENSG00000168297	PXK
	ENST00000261377	ENSG00000005189	AC004381.6
	ENST00000005257	ENSG00000006451	RALA
	ENST00000228506	ENSG00000110917	MLEC
	ENST00000298068	ENSG00000165338	HECTD2
	ENST00000264712	ENSG00000084731	KIF3C
	ENST00000284073	ENSG00000153944	MSI2
	ENST00000263413	ENSG00000039537	C6
	ENST00000252575	ENSG00000130287	NCAN
	ENST00000269228	ENSG00000141458	NPC1
	ENST00000311745	ENSG00000078328	RBFOX1
	ENST00000254941	ENSG00000132603	NIP7
	ENST00000265734	ENSG00000105810	CDK6
	ENST00000265810	ENSG00000120913	PDLIM2
	ENST00000249806	ENSG00000128973	CLN6
	ENST00000301904	ENSG00000168077	SCARA3
	ENST00000263512	ENSG00000126903	SLC10A3
	ENST00000215885	ENSG00000100078	PLA2G3
	ENST00000267889	ENSG00000140323	DISP2
	ENST00000284165	ENSG00000125952	MAX
	ENST00000257548	ENSG00000135093	USP30
	ENST00000262160	ENSG00000175387	SMAD2
	ENST00000261963	ENSG00000126217	MCF2L
	ENST00000305253	ENSG00000166402	TUB
	ENST00000244513	ENSG00000124557	BTN1A1
	ENST00000219139	ENSG00000125149	C16orf70
	ENST00000276141	ENSG00000102362	SYTL4
	ENST00000307849	ENSG00000173559	NABP1
	ENST00000312562	ENSG00000175592	FOSL1
	ENST00000218340	ENSG00000102218	RP2
	ENST00000206423	ENSG00000091986	CCDC80
	ENST00000282869	ENSG00000152926	ZNF117
	ENST00000242315	ENSG00000122733	PHF24
	ENST00000264607	ENSG00000065802	ASB1
	ENST00000283254	ENSG00000153253	SCN3A
	ENST00000259939	ENSG00000137393	RNF144B
	ENST00000265769	ENSG00000042980	ADAM28
	ENST00000259050	ENSG00000136536	42801
	ENST00000229812	ENSG00000112079	STK38
	ENST00000283131	ENSG00000153147	SMARCA5
	ENST00000242848	ENSG00000123200	ZC3H13
	ENST00000272638	ENSG00000144224	UBXN4
	ENST00000264779	ENSG00000062194	GPBP1
	ENST00000264832	ENSG00000090339	ICAM1
	ENST00000243896	ENSG00000080189	SLC35C2
	ENST00000265728	ENSG00000006634	DBF4
	ENST00000257776	ENSG00000135324	MRAP2
	ENST00000263255	ENSG00000100372	SLC25A17
	ENST00000295225	ENSG00000115041	KCNIP3
	ENST00000167825	ENSG00000074964	ARHGEF10L
	ENST00000287908	ENSG00000157214	STEAP2
	ENST00000300853	ENSG00000012061	ERCC1
	ENST00000278893	ENSG00000168000	BSCL2
	ENST00000308177	ENSG00000240184	PCDHGC3
	ENST00000289269	ENSG00000243232	PCDHAC2
	ENST00000216733	ENSG00000100842	EFS
	ENST00000290209	ENSG00000140199	SLC12A6
	ENST00000256682	ENSG00000134287	ARF3
	ENST00000230582	ENSG00000112812	PRSS16
	ENST00000244766	ENSG00000124785	NRN1
	ENST00000234115	ENSG00000115762	PLEKHB2
	ENST00000274938	ENSG00000146197	SCUBE3
	ENST00000310544	ENSG00000173868	PHOSPHO1
	ENST00000304191	ENSG00000169612	FAM103A1
	ENST00000288840	ENSG00000137834	SMAD6
	ENST00000302805	ENSG00000168939	SPRY3
	ENST00000296412	ENSG00000197894	ADH5
	ENST00000309522	ENSG00000138796	HADH
	ENST00000262146	ENSG00000066855	MTFR1
	ENST00000257724	ENSG00000135272	MDFIC
	ENST00000265857	ENSG00000239857	GET4
	ENST00000251089	ENSG00000013523	ANGEL1
	ENST00000309241	ENSG00000155846	PPARGC1B
	ENST00000306406	ENSG00000171227	TMEM37
	ENST00000281127	ENSG00000021645	NRXN3
	ENST00000260385	ENSG00000137824	RMDN3
	ENST00000246006	ENSG00000125810	CD93
	ENST00000216554	ENSG00000100664	EIF5
	ENST00000262043	ENSG00000118482	PHF3
	ENST00000298130	ENSG00000165389	SPTSSA
	ENST00000234827	ENSG00000116205	TCEANC2
	ENST00000262735	ENSG00000186951	PPARA
	ENST00000263063	ENSG00000107951	MTPAP
	ENST00000255390	ENSG00000133028	SCO1
	ENST00000216037	ENSG00000100219	XBP1
	ENST00000258457	ENSG00000135974	C2orf49
	ENST00000244745	ENSG00000124766	SOX4
	ENST00000313552	ENSG00000168395	ING5
	ENST00000264657	ENSG00000168610	STAT3
	ENST00000290158	ENSG00000108424	KPNB1
	ENST00000216951	ENSG00000100983	GSS
	ENST00000235878	ENSG00000117226	GBP3
	ENST00000286307	ENSG00000155858	LSM11
	ENST00000231484	ENSG00000113555	PCDH12
	ENST00000231130	ENSG00000113205	PCDHB3
	ENST00000234961	ENSG00000116329	OPRD1
	ENST00000286648	ENSG00000156136	DCK
	ENST00000286298	ENSG00000155850	SLC26A2
	ENST00000261890	ENSG00000103769	RAB11A
	ENST00000244221	ENSG00000124374	PAIP2B
	ENST00000280200	ENSG00000150637	CD226
	ENST00000310397	ENSG00000162804	SNED1
	ENST00000261169	ENSG00000048540	LMO3
	ENST00000296861	ENSG00000146072	TNFRSF21
	ENST00000268673	ENSG00000140992	PDPK1
	ENST00000282466	ENSG00000152580	IGSF10
	ENST00000261254	ENSG00000118971	CCND2
	ENST00000262858	ENSG00000013619	MAMLD1
	ENST00000262384	ENSG00000102921	N4BP1
	ENST00000301061	ENSG00000169884	WNT10B
	ENST00000242210	ENSG00000122643	NT5C3A
	ENST00000281703	ENSG00000151948	GLT1D1
	ENST00000263697	ENSG00000126698	DNAJC8
	ENST00000230301	ENSG00000112539	C6orf118
	ENST00000265986	ENSG00000119912	IDE
	ENST00000265334	ENSG00000006837	CDKL3
	ENST00000258733	ENSG00000136235	GPNMB
	ENST00000053243	ENSG00000048462	TNFRSF17
	ENST00000307719	ENSG00000171428	NAT1
	ENST00000262717	ENSG00000101542	CDH20
	ENST00000312962	ENSG00000129347	KRI1
	ENST00000233156	ENSG00000003436	TFPI
	ENST00000230085	ENSG00000112335	SNX3
	ENST00000232974	ENSG00000114853	ZBTB47
	ENST00000271715	ENSG00000143442	POGZ
	ENST00000285681	ENSG00000155313	USP25
	ENST00000260733	ENSG00000138162	TACC2
	ENST00000219281	ENSG00000103005	USB1
	ENST00000265271	ENSG00000091009	RBM27
	ENST00000256458	ENSG00000134070	IRAK2
	ENST00000277632	ENSG00000148481	FAM188A
	ENST00000251900	ENSG00000102098	SCML2
	ENST00000253122	ENSG00000130821	SLC6A8
	ENST00000252032	ENSG00000088854	C20orf194
	ENST00000264167	ENSG00000018510	AGPS
	ENST00000229563	ENSG00000111843	TMEM14C
	ENST00000309955	ENSG00000003402	CFLAR
	ENST00000309993	ENSG00000174579	MSL2
	ENST00000287766	ENSG00000157103	SLC6A1
	ENST00000305641	ENSG00000168806	LCMT2
	ENST00000261745	ENSG00000111300	NAA25
	ENST00000262622	ENSG00000124302	CHST8
	ENST00000262932	ENSG00000166997	CNPY4
	ENST00000217964	ENSG00000101849	TBL1X
	ENST00000255830	ENSG00000133460	SLC2A11
	ENST00000228515	ENSG00000110925	CSRNP2
	ENST00000250894	ENSG00000138834	MAPK8IP3
	ENST00000309534	ENSG00000163320	CGGBP1
	ENST00000258098	ENSG00000135631	RAB11FIP5
	ENST00000256545	ENSG00000134153	EMC7
	ENST00000296666	ENSG00000164244	PRRC1
	ENST00000267512	ENSG00000139998	RAB15
	ENST00000253063	ENSG00000130766	SESN2
	ENST00000281146	ENSG00000151470	C4orf33
	ENST00000280285	ENSG00000150712	MTMR12
	ENST00000240101	ENSG00000120875	DUSP4
	ENST00000261854	ENSG00000138600	SPPL2A
	ENST00000242159	ENSG00000122592	HOXA7
	ENST00000243300	ENSG00000123572	NRK
	ENST00000164133	ENSG00000068971	PPP2R5B
	ENST00000258526	ENSG00000136040	PLXNC1
	ENST00000287263	ENSG00000156675	RAB11FIP1
	ENST00000182527	ENSG00000065308	TRAM2
	ENST00000293968	ENSG00000162063	CCNF
	ENST00000296490	ENSG00000164091	WDR82
	ENST00000263246	ENSG00000100266	PACSIN2
	ENST00000303531	ENSG00000166501	PRKCB
	ENST00000301039	ENSG00000167525	PROCA1
	ENST00000262450	ENSG00000116254	CHD5
	ENST00000262644	ENSG00000104331	IMPAD1
	ENST00000261503	ENSG00000128487	SPECC1
	ENST00000233630	ENSG00000115289	PCGF1
	ENST00000313164	ENSG00000112936	C7
	ENST00000257572	ENSG00000135116	HRK
hsa-miR-423-5p
	ENST00000242108	ENSG00000122547	EEPD1
	ENST00000265678	ENSG00000071242	RPS6KA2
	ENST00000294868	ENSG00000157064	NMNAT2
	ENST00000225983	ENSG00000108840	HDAC5
	ENST00000265634	ENSG00000106236	NPTX2
	ENST00000217195	ENSG00000101220	C20orf27
	ENST00000250244	ENSG00000129354	AP1M2
	ENST00000286201	ENSG00000155760	FZD7
	ENST00000300589	ENSG00000167207	NOD2
	ENST00000308219	ENSG00000174672	BRSK2
	ENST00000297533	ENSG00000164897	TMUB1
	ENST00000232508	ENSG00000114395	CYB561D2
	ENST00000270310	ENSG00000221946	FXYD7
	ENST00000219271	ENSG00000102996	MMP15
	ENST00000292841	ENSG00000196967	ZNF585A
	ENST00000255764	ENSG00000133398	MED10
	ENST00000223398	ENSG00000106665	CLIP2
	ENST00000262366	ENSG00000126603	GLIS2
	ENST00000227665	ENSG00000110243	APOA5
	ENST00000517480	ENSG00000164611	PTTG1
	ENST00000255559	ENSG00000133195	SLC39A11
	ENST00000294072	ENSG00000162144	CYB561A3
	ENST00000006053	ENSG00000006210	CX3CL1
	ENST00000269886	ENSG00000141985	SH3GL1
	ENST00000309731	ENSG00000175318	GRAMD2
	ENST00000305958	ENSG00000088826	SMOX
	ENST00000300176	ENSG00000106351	AGFG2
	ENST00000263707	ENSG00000115112	TFCP2L1
	ENST00000267199	ENSG00000139719	VPS33A
	ENST00000173229	ENSG00000065320	NTN1
	ENST00000261205	ENSG00000067715	SYT1
	ENST00000303407	ENSG00000169925	BRD3
	ENST00000262895	ENSG00000105737	GRIK5
	ENST00000236671	ENSG00000117984	CTSD
	ENST00000252136	ENSG00000099899	TRMT2A
	ENST00000261653	ENSG00000111450	STX2
	ENST00000237536	ENSG00000149639	SOGA1
	ENST00000211076	ENSG00000095917	TPSD1
	ENST00000216727	ENSG00000100836	PABPN1
	ENST00000271332	ENSG00000143126	CELSR2
	ENST00000262971	ENSG00000105229	PIAS4
	ENST00000250896	ENSG00000099875	MKNK2
	ENST00000215904	ENSG00000241360	PDXP
	ENST00000313601	ENSG00000114353	GNAI2
	ENST00000311862	ENSG00000186652	PRG2
	ENST00000299194	ENSG00000166159	LRTM2
	ENST00000227471	ENSG00000110057	UNC93B1
	ENST00000264741	ENSG00000144668	ITGA9
	ENST00000262032	ENSG00000123411	IKZF4
	ENST00000303077	ENSG00000170577	SIX2
	ENST00000002501	ENSG00000003249	DBNDD1
	ENST00000257974	ENSG00000161850	KRT82
	ENST00000291572	ENSG00000160216	AGPAT3
	ENST00000271411	ENSG00000143190	POU2F1
	ENST00000266027	ENSG00000114353	GNAI2
	ENST00000248420	ENSG00000105298	CACTIN
	ENST00000297195	ENSG00000164638	SLC29A4
	ENST00000234313	ENSG00000115956	PLEK
	ENST00000280057	ENSG00000150510	FAM124A
	ENST00000304546	ENSG00000171551	ECEL1
	ENST00000296288	ENSG00000163930	BAP1
	ENST00000308874	ENSG00000172889	EGFL7
	ENST00000305747	ENSG00000172292	CERS6
	ENST00000285605	ENSG00000155254	MARVELD1
	ENST00000261226	ENSG00000057704	TMCC3
	ENST00000302351	ENSG00000171617	ENC1
	ENST00000279873	ENSG00000150347	ARID5B
	ENST00000292853	ENSG00000161243	FBXO27
	ENST00000308234	ENSG00000174136	RGMB
	ENST00000261835	ENSG00000036530	CYP46A1
	ENST00000247161	ENSG00000126767	ELK1
	ENST00000286122	ENSG00000172530	BANP
	ENST00000284727	ENSG00000154518	ATP5G3
	ENST00000305943	ENSG00000168159	RNF187
	ENST00000263932	ENSG00000120949	TNFRSF8
	ENST00000261381	ENSG00000103489	XYLT1
	ENST00000269439	ENSG00000141622	RNF165
	ENST00000227618	ENSG00000110200	ANAPC15
	ENST00000262430	ENSG00000103150	MLYCD
	ENST00000264025	ENSG00000110400	PVRL1
	ENST00000295150	ENSG00000186453	FAM228A
	ENST00000283635	ENSG00000153563	CD8A
	ENST00000269051	ENSG00000141314	RHBDL3
	ENST00000253778	ENSG00000131459	GFPT2
	ENST00000231751	ENSG00000012223	LTF
	ENST00000240364	ENSG00000121104	FAM117A
	ENST00000273063	ENSG00000114923	SLC4A3
	ENST00000274867	ENSG00000146122	DAAM2
	ENST00000193391	ENSG00000081148	IMPG2
	ENST00000307364	ENSG00000225697	SLC26A6
	ENST00000265342	ENSG00000053108	FSTL4
	ENST00000248114	ENSG00000127554	GFER
	ENST00000303887	ENSG00000166508	MCM7
	ENST00000284987	ENSG00000154736	ADAMTS5
	ENST00000304062	ENSG00000168993	CPLX1
	ENST00000259633	ENSG00000137101	CD72
	ENST00000298912	ENSG00000165959	CLMN
	ENST00000225916	ENSG00000108773	KAT2A
	ENST00000230173	ENSG00000112414	ADGRG6
	ENST00000261861	ENSG00000103647	CORO2B
	ENST00000312053	ENSG00000174837	ADGRE1
	ENST00000292144	ENSG00000160654	CD3G
	ENST00000257075	ENSG00000134644	PUM1
	ENST00000252034	ENSG00000049540	ELN
	ENST00000219235	ENSG00000102962	CCL22
	ENST00000218789	ENSG00000102606	ARHGEF7
	ENST00000303892	ENSG00000213760	ATP6V1G2
	ENST00000219320	ENSG00000103042	SLC38A7
	ENST00000222482	ENSG00000128510	CPA4
	ENST00000265537	ENSG00000011376	LARS2
	ENST00000257749	ENSG00000112182	BACH2
	ENST00000296734	ENSG00000164294	GPX8
	ENST00000279394	ENSG00000149930	TAOK2
	ENST00000233545	ENSG00000115204	MPV17
	ENST00000268679	ENSG00000129993	CBFA2T3
	ENST00000257575	ENSG00000135119	RNFT2
	ENST00000292431	ENSG00000160877	NACC1
	ENST00000264039	ENSG00000063660	GPC1
	ENST00000216259	ENSG00000100417	PMM1
	ENST00000161559	ENSG00000079385	CEACAM1
	ENST00000217254	ENSG00000101276	SLC52A3
	ENST00000220913	ENSG00000104472	CHRAC1
	ENST00000301178	ENSG00000167601	AXL
	ENST00000255078	ENSG00000132740	IGHMBP2
	ENST00000246115	ENSG00000125910	S1PR4
	ENST00000221855	ENSG00000105254	TBCB
	ENST00000254488	ENSG00000132164	SLC6A11
	ENST00000288774	ENSG00000157911	PEX10
	ENST00000285208	ENSG00000154917	RAB6B
	ENST00000215832	ENSG00000100030	MAPK1
	ENST00000249330	ENSG00000128564	VGF
	ENST00000244303	ENSG00000124440	HIF3A
	ENST00000280562	ENSG00000090975	PITPNM2
	ENST00000287020	ENSG00000156466	GDF6
	ENST00000172229	ENSG00000064300	NGFR
	ENST00000295092	ENSG00000162981	FAM84A
	ENST00000264716	ENSG00000075426	FOSL2
	ENST00000243298	ENSG00000123570	RAB9B
	ENST00000263610	ENSG00000125492	BARHL1
	ENST00000307518	ENSG00000165887	ANKRD2
	ENST00000303375	ENSG00000011028	MRC2
	ENST00000290585	ENSG00000159409	CELF3
	ENST00000309117	ENSG00000157538	DSCR3
	ENST00000299505	ENSG00000166398	KIAA0355
	ENST00000239151	ENSG00000120075	HOXB5
	ENST00000303395	ENSG00000144285	SCN1A
	ENST00000261318	ENSG00000111412	C12orf49
	ENST00000231668	ENSG00000113734	BNIP1
	ENST00000308742	ENSG00000175548	ALG10B
	ENST00000263073	ENSG00000070366	SMG6
	ENST00000261813	ENSG00000113068	PFDN1
	ENST00000263112	ENSG00000099998	GGT5
	ENST00000259339	ENSG00000136816	TOR1B
	ENST00000024061	ENSG00000022567	SLC45A4
	ENST00000296215	ENSG00000163877	SNIP1
	ENST00000262795	ENSG00000251322	SHANK3
	ENST00000263382	ENSG00000105011	ASF1B
	ENST00000301717	ENSG00000162032	SPSB3
	ENST00000288943	ENSG00000158050	DUSP2
	ENST00000011653	ENSG00000010610	CD4
	ENST00000254051	ENSG00000131746	TNS4
	ENST00000262259	ENSG00000105497	ZNF175
	ENST00000242592	ENSG00000122971	ACADS
	ENST00000265070	ENSG00000113384	GOLPH3
	ENST00000225777	ENSG00000108639	SYNGR2
	ENST00000219782	ENSG00000103495	MAZ
	ENST00000221573	ENSG00000104976	SNAPC2
	ENST00000212355	ENSG00000069702	TGFBR3
	ENST00000277554	ENSG00000148411	NACC2
	ENST00000304743	ENSG00000100731	PCNX
	ENST00000225512	ENSG00000108379	WNT3
	ENST00000229264	ENSG00000111664	GNB3
	ENST00000306422	ENSG00000171540	OTP
	ENST00000307358	ENSG00000170801	HTRA3
	ENST00000228468	ENSG00000110881	ASIC1
	ENST00000203664	ENSG00000089723	OTUB2
	ENST00000237247	ENSG00000118473	SGIP1
	ENST00000219478	ENSG00000103199	ZNF500
	ENST00000282878	ENSG00000152932	RAB3C
	ENST00000292535	ENSG00000257923	CUX1
	ENST00000263025	ENSG00000102882	MAPK3
	ENST00000261712	ENSG00000108671	PSMD11
	ENST00000241337	ENSG00000213366	GSTM2
	ENST00000264414	ENSG00000036257	CUL3
	ENST00000257215	ENSG00000134780	DAGLA
	ENST00000046640	ENSG00000040531	CTNS
	ENST00000291592	ENSG00000160233	LRRC3
	ENST00000272427	ENSG00000144036	EXOC6B
	ENST00000215061	ENSG00000099330	OCEL1
	ENST00000229829	ENSG00000204252	HLA-DOA
	ENST00000256637	ENSG00000134243	SORT1
	ENST00000202831	ENSG00000089060	SLC8B1
	ENST00000261654	ENSG00000111452	ADGRD1
	ENST00000262965	ENSG00000071564	TCF3
	ENST00000263233	ENSG00000102003	SYP
	ENST00000304613	ENSG00000171798	KNDC1
	ENST00000276185	ENSG00000147234	FRMPD3
	ENST00000233121	ENSG00000084764	MAPRE3
	ENST00000230361	ENSG00000112599	GUCA1B
	ENST00000007264	ENSG00000007376	RPUSD1
	ENST00000282120	ENSG00000152291	TGOLN2
	ENST00000233330	ENSG00000114993	RTKN
	ENST00000302538	ENSG00000159842	ABR
	ENST00000251871	ENSG00000042429	MED17
	ENST00000191018	ENSG00000064601	CTSA
	ENST00000257868	ENSG00000135414	GDF11
	ENST00000256646	ENSG00000134250	NOTCH2
	ENST00000270328	ENSG00000142303	ADAMTS10
	ENST00000303004	ENSG00000172216	CEBPB
	ENST00000301891	ENSG00000168065	SLC22A11
	ENST00000301691	ENSG00000167941	SOST
	ENST00000012443	ENSG00000011485	PPP5C
	ENST00000265293	ENSG00000113645	WWC1
	ENST00000178638	ENSG00000074410	CA12
	ENST00000287169	ENSG00000156599	ZDHHC5
	ENST00000291232	ENSG00000159958	TNFRSF13C
	ENST00000251547	ENSG00000132879	FBXO44
	ENST00000247087	ENSG00000126705	AHDC1
	ENST00000306014	ENSG00000123064	DDX54
	ENST00000198801	ENSG00000166391	MOGAT2
	ENST00000263798	ENSG00000092445	TYRO3
	ENST00000289422	ENSG00000158458	NRG2
	ENST00000312438	ENSG00000175505	CLCF1
	ENST00000222329	ENSG00000105722	ERF
	ENST00000265909	ENSG00000120451	SNX19
	ENST00000253008	ENSG00000130711	PRDM12
	ENST00000306243	ENSG00000169105	CHST14
	ENST00000297620	ENSG00000164970	FAM219A
	ENST00000261177	ENSG00000110900	TSPAN11
	ENST00000009105	ENSG00000008118	CAMK1G
	ENST00000261652	ENSG00000240505	TNFRSF13B
	ENST00000261889	ENSG00000028528	SNX1
	ENST00000267594	ENSG00000140067	FAM181A
	ENST00000297873	ENSG00000165171	WBSCR27
	ENST00000294129	ENSG00000213672	NCKIPSD
	ENST00000308731	ENSG00000010671	BTK
	ENST00000263650	ENSG00000021762	OSBPL5
	ENST00000246949	ENSG00000213918	DNASE1
	ENST00000246229	ENSG00000126003	PLAGL2
	ENST00000263857	ENSG00000068654	POLR1A
	ENST00000263431	ENSG00000126583	PRKCG
	ENST00000266068	ENSG00000101216	GMEB2
	ENST00000214869	ENSG00000099203	TMED1
	ENST00000309469	ENSG00000130734	ATG4D
	ENST00000313695	ENSG00000116584	ARHGEF2
	ENST00000269321	ENSG00000141522	ARHGDIA
	ENST00000230671	ENSG00000011083	SLC6A7
	ENST00000224140	ENSG00000107290	SETX
	ENST00000298808	ENSG00000165887	ANKRD2
	ENST00000306534	ENSG00000154133	ROBO4
	ENST00000304611	ENSG00000124587	PEX6
	ENST00000249749	ENSG00000128917	DLL4
	ENST00000309060	ENSG00000174306	ZHX3
	ENST00000261980	ENSG00000119614	VSX2
	ENST00000287387	ENSG00000156795	WDYHV1
	ENST00000263334	ENSG00000125618	PAX8
	ENST00000261740	ENSG00000111199	TRPV4

## Sheet: supplementary table 4
The target mRNAs of hsa-miR-320a and hsa-miR-423-5p by microarray analysis of somatotroph adenomas and healthy pituitary samples
GeneSymbol	pvalues	foldchange(GH/N)	NORMAL_151127_NS	NORMAL_151208_NS	NORMAL_151216_NS	NORMAL_8_NS	NORMAL_N151231A_NS	NORMAL_N160105_NS	GH1017_NS	GH1049_NS	GH1205_NS	GH1332_NS	GH1350_NS	GH908_NS	GH940_NS	GH984_NS	Description	Sequence	Chromosome_Number_Avadis_	Chromosome_Start_Index_Avadis_	Chromosome_End_Index_Avadis_	Chromosome_Strand_Avadis_	ControlType	Cytoband	EnsemblID	EntrezGeneID	GenbankAccession	GeneName	Go	RefSeqAccession	TIGRID
ACTCCGAAGAAGAGCGCTAAGAAAACACCGAAGAAAGCGAAGAAGCCGGCTGCAGCTGCT	1.79e-05	5.77426	9.64594	9.80713	10.4124	9.75511	11.1702	10.6927	7.12914	7.17644	7.59921	6.73	7.38074	9.47672	7.895	6.88881	NA	NA	NA	NA	FALSE	NA	NA	NA	NA	NA	NA	NA	NA	NA	NA
P13985_HUMAN (P13985) P25 protein, partial (97%) [THC2666258]	0.0049134	0.466764	9.90491	9.60207	9.64796	9.44439	9.08765	9.48354	11.1228	10.6949	10.3964	10.7878	9.38436	11.4465	10.6247	9.64046	GCGGGCTGGGCGCTCTGGCGGTGTGCGCTGAGGTGGGCAGAGCGGCAGGTGGGGGCGTTG	chr1	229406695	229406754	-	FALSE	hs|1q42.13	ENST00000434404	NA	NA	NA	NA	NA	THC2666258	NA
OSBPL3	1.32e-05	0.231257	4.03314	4.22241	3.41426	4.58578	3.63727	4.20363	7.14116	6.0668	5.37998	6.2951	5.4914	5.30032	6.62209	6.10143	Homo sapiens oxysterol binding protein-like 3 (OSBPL3), transcript variant 1, mRNA [NM_015550]	TTCCTGCTTCTTGAAAGTGAATTTTATAAAGGCAAAATACTGGAGCACTAATGCCCATGA	chr7	24849542	24854708	-	FALSE	hs|7p15.3	ENST00000487020	26031	NM_015550	oxysterol binding protein-like 3	GO:0005515|GO:0031965|GO:0016020|GO:0005886|GO:0015485|GO:0006869|GO:0097038|GO:0005829	NM_015550	THC2480505
DEPDC7	0.00666256	2.81331	6.07382	5.19718	5.12981	5.63495	5.92372	5.645	0.587692	3.59422	5.615	3.05767	3.99583	4.77519	3.46458	4.05742	Homo sapiens DEP domain containing 7 (DEPDC7), transcript variant 2, mRNA [NM_139160]	GAGAATTGATCAACGTGACTATTCCAACAATACAGAGAAGACAACCAAAGATGAGCTGTT	chr11	33054824	33054883	+	FALSE	hs|11p13	ENST00000616885	91614	NM_139160	DEP domain containing 7	GO:0051056|GO:0008150|GO:0003674|GO:0007264|GO:0005575|GO:0005829	NM_139160	THC2484755
LINC00346	0.00158636	0.273912	6.44098	6.40719	6.45135	7.02934	6.21486	6.24418	8.45901	9.00682	8.43459	8.05998	6.56545	9.42698	7.92207	6.9503	Homo sapiens long intergenic non-protein coding RNA 346 (LINC00346), long non-coding RNA [NR_027701]	TACTTGCGCACGTCTGGTAGCTGCCCTGGACATTCATGGACTTTCGTTTTCACTCAGATT	chr13	111521800	111521859	-	FALSE	hs|13q34	ENST00000538077	283487	NR_027701	long intergenic non-protein coding RNA 346	GO:0005654|GO:0005634|GO:0043231	NR_027701	THC2479531
TMEM154	0.00079049	2.58488	6.69473	7.01875	6.48072	7.65682	6.8516	6.72804	5.30132	5.53301	3.85969	5.11145	5.51671	6.68827	5.86433	5.41784	Homo sapiens transmembrane protein 154 (TMEM154), mRNA [NM_152680]	GCATTTTCGTACATTTTAAGCAAACTAGGTTAACAACAACATAGCCTAGTCAAACTTCTC	chr4	153547302	153547361	-	FALSE	hs|4q31.3	ENST00000304385	201799	NM_152680	transmembrane protein 154	GO:0016021	NM_152680	THC2471153
S100A14	0.00124284	3.52788	6.74936	6.34528	6.64873	5.82504	7.60246	5.40978	4.84677	4.28833	3.5385	5.23505	4.70377	4.74658	5.17733	5.06902	Homo sapiens S100 calcium binding protein A14 (S100A14), mRNA [NM_020672]	AGCTGGGCTATGGGAAATGATTTGAATAATGGAGCTGGGAATATGGCTGGATATCTGGTA	chr1	153587006	153587065	-	FALSE	hs|1q21.3	ENST00000344616	57402	NM_020672	S100 calcium binding protein A14	GO:0048471|GO:0030054|GO:0034142|GO:0005886|GO:0005509|GO:0006915|GO:0042379|GO:0071624|GO:0055074|GO:0005737|GO:0015630|GO:0032496|GO:0005654|GO:0090026|GO:0042742|GO:0070062	NM_020672	THC2461637
T cell receptor beta variable 5-1 [Source:HGNC Symbol;Acc:HGNC:12218] [ENST00000390381]	0.000166874	0.430456	3.47768	3.5648	3.4335	3.32747	3.50734	4.10996	5.38084	5.34953	4.90415	4.66635	3.80834	4.7201	4.60169	4.45979	CAGGACAGGGCCTTCAGTTCCTCTTTGAATACTTCAGTGAGACACAGAGAAACAAAGGAA	chr7	142021193	142021252	+	FALSE	hs|7q34	ENST00000390381	NA	AB305818	NA	NA	NA	NP161141	NA
KCTD15	9.62e-05	0.312008	6.27359	7.84325	7.50889	7.02846	7.18366	6.98547	9.19531	8.44123	8.59809	8.86628	9.20129	8.03864	9.14377	9.24247	Homo sapiens potassium channel tetramerization domain containing 15 (KCTD15), transcript variant 1, mRNA [NM_024076]	TCCAGTTTTCTCATGCGAATATGCACAGTTTTAATTCACGTTGTTACACTAGCCTGCCGA	chr19	34304755	34304814	+	FALSE	hs|19q13.11	ENST00000430256	79047	NM_024076	potassium channel tetramerization domain containing 15	GO:0051260|GO:0007275	NM_024076	THC2464378
NFX1	0.000853764	0.395187	9.57963	9.43686	9.77316	9.48182	9.62893	9.66459	10.9009	10.708	10.6156	10.7375	10.1973	12.2383	10.5755	10.3457	Homo sapiens nuclear transcription factor, X-box binding 1 (NFX1), transcript variant 2, mRNA [NM_147133]	TATCATTCTTGTCATAGTGAGGAGAAGTGTCCCCCTTGCACTTTCCTAACTCAGAAGTGG	chr9	33347038	33347097	+	FALSE	hs|9p13.3	ENST00000466971	4799	NM_147133	nuclear transcription factor, X-box binding 1	GO:0000977|GO:0003700|GO:0005886|GO:0006366|GO:0016874|GO:0005634|GO:0000122|GO:0001078|GO:0005737|GO:0006954|GO:0045347|GO:0016032|GO:0005654|GO:0008270	NM_147133	THC2478617
ID3	6.66e-05	4.76417	12.4302	11.8704	11.1136	12.0158	10.9673	11.5554	8.55694	8.20597	8.37723	8.63702	9.47435	10.8162	10.3048	9.21038	Homo sapiens inhibitor of DNA binding 3, dominant negative helix-loop-helix protein (ID3), mRNA [NM_002167]	AGCCAGGTGGAAATCCTACAGCGCGTCATCGACTACATTCTCGACCTGCAGGTAGTCCTG	chr1	23885666	23885725	-	FALSE	hs|1p36.12	ENST00000486541	3399	NM_002167	inhibitor of DNA binding 3, dominant negative helix-loop-helix protein	GO:0005515|GO:0001656|GO:0003700|GO:0005634|GO:0045662|GO:0043433|GO:0007507|GO:0005737|GO:0030182|GO:0015630|GO:0030855|GO:0051726|GO:0046983|GO:0042476|GO:0006275|GO:0043065|GO:0003714|GO:0019904|GO:0009611|GO:0007275|GO:0000122|GO:0007417|GO:0006351|GO:0045668|GO:0007517|GO:0007623|GO:0005654|GO:0030903|GO:0045892|GO:0008134	NM_002167	THC2578468
DOCK7	0.00608473	2.06687	9.15867	8.78344	10.4912	9.61144	9.84917	9.47435	8.08507	8.05624	8.53452	8.18154	8.45506	9.81416	8.30427	8.5461	Homo sapiens dedicator of cytokinesis 7 (DOCK7), transcript variant 2, mRNA [NM_033407]	GATCGAACTCCAAATGAAGAAATAGACCGTCAGAATGATGACCAAAGGAAATCAAACCGT	chr1	63113816	63113875	-	FALSE	hs|1p31.3	ENST00000404627	85440	NM_033407	dedicator of cytokinesis 7	GO:0043005|GO:0030424|GO:0007264|GO:0045178|GO:0000226|GO:0045200|GO:0007409|GO:0032863|GO:0031175|GO:0030426|GO:0005085|GO:0048365|GO:0033138|GO:0050767|GO:0008180|GO:0002244|GO:0022027|GO:0043473|GO:0005925	NM_033407	THC2476979
ribosomal protein L22 pseudogene 19 [Source:HGNC Symbol;Acc:HGNC:36567] [ENST00000392735]	0.0107268	0.146764	9.62196	9.57926	9.902	10.2856	9.8137	9.95906	12.7139	13.5406	12.9694	12.6835	8.63333	13.2391	12.809	9.78709	GACATCCAAGCTGCCCTTTTCCAACAGGTATTTGAAATATCTCACCAAAAAATATCTGAA	chr12	125420135	125420194	-	FALSE	hs|12q24.31	ENST00000392735	NA	AX721264	NA	NA	NA	NA	NA
MT2A	0.029961	3.91742	14.7152	14.1021	14.9191	11.6358	15.9988	13.4291	13.0943	11.6796	10.4014	11.8086	11.1527	13.8388	13.8995	11.8273	Homo sapiens metallothionein 2A (MT2A), mRNA [NM_005953]	CTGACCGTGACCGTTTGCTATATTCCTTTTTCTATGAAATAATGTGAATAATAATTAAAC	chr16	56643337	56643396	+	FALSE	hs|16q12.2	ENST00000245185	4502	NM_005953	metallothionein 2A	GO:0071294|GO:0005515|GO:0048471|GO:0019221|GO:0005634|GO:0035690|GO:0036016|GO:0005829|GO:0036018|GO:0005737|GO:0006878|GO:0008144|GO:0008270|GO:0045926|GO:0060333	NM_005953	THC2469351
CAGCCACTGTGGGCGCCTGACCAAACTCACTAAATTTGTGTGGGACATGATCCCAGAGGT	0.00195029	0.0923496	6.18119	6.2928	6.293	6.58607	5.76761	5.99284	9.81138	10.444	9.93604	9.45686	5.94534	10.5321	9.60331	6.79134	chr4	76958081	76958140	-	FALSE	hs|4q21.1	ENST00000477971	NA	NA	NA	NA	NA	NA	NA	NA
KLK1	0.0130583	2.46984	3.5936	3.46864	3.77997	5.22504	2.95727	4.15442	1.84427	1.83526	1.64995	3.69223	0.896144	3.18738	4.16547	0.822018	Homo sapiens kallikrein 1 (KLK1), mRNA [NM_002257]	GTCAGAGTGCTGTCTTATGTGAAGTGGATCGAGGACACCATAGCGGAGAACTCCTGAACG	chr19	51322447	51322506	-	FALSE	hs|19q13.33	ENST00000301420	3816	NM_002257	kallikrein 1	GO:0004252|GO:0006508|GO:0005634|GO:0070062	NM_002257	NP113453
TYRO3	9.17e-05	2.42039	7.8803	7.81505	7.8998	7.78425	7.64142	7.34926	6.21626	6.36367	5.97053	6.04039	5.85448	6.15136	7.53344	6.7447	Homo sapiens TYRO3 protein tyrosine kinase (TYRO3), mRNA [NM_006293]	CTCAAAATATCCTAAGACTAACAAAGGCAGCTGTGTCTGAGCCCAACCCTTCTAAACGGT	chr15	41871259	41871318	+	FALSE	hs|15q15.1	ENST00000568490	7301	NM_006293	TYRO3 protein tyrosine kinase	GO:0005515|GO:0034122|GO:0060068|GO:0005634|GO:0042698|GO:0007283|GO:0005635|GO:0043524|GO:0046777|GO:0034446|GO:0001779|GO:0007155|GO:0045824|GO:0023014|GO:0046982|GO:0030168|GO:0043277|GO:0018108|GO:0005524|GO:0014065|GO:0070527|GO:0007165|GO:0005887|GO:0050728|GO:0005789|GO:0043491|GO:0051250|GO:0004713|GO:0021885|GO:0070050|GO:0004714|GO:0032940|GO:0004716|GO:0043548	NM_006293	THC2461732
IP6K2	0.00226493	2.29086	12.1713	12.4354	13.5324	13.1186	13.4078	13.0344	11.6534	11.5336	11.789	12.0073	12.0432	11.9076	11.4183	12.1513	Homo sapiens inositol hexakisphosphate kinase 2 (IP6K2), transcript variant 3, mRNA [NM_001005910]	TTATTTTGCTTTGCTTACCCAGTCTTCCCTTACTCTTGGATGCTTCTTAACCCTCAGGCA	chr3	48731052	48731111	-	FALSE	hs|3p21.31	ENST00000416707	51447	NM_001005910	inositol hexakisphosphate kinase 2	GO:0008440|GO:0030308|GO:0043065|GO:0043647|GO:0019221|GO:0052724|GO:0052723|GO:0005634|GO:0044281|GO:0000832|GO:0005524|GO:0046854|GO:0060337|GO:0006817|GO:0005654|GO:0045111	NM_001005910	THC2492801
KCNG4	0.000148619	0.478314	5.4536	5.36722	5.61549	5.7614	5.62522	5.83955	6.56705	7.01743	6.93275	6.59113	5.96834	7.2368	6.59891	6.10806	Homo sapiens potassium channel, voltage gated modifier subfamily G, member 4 (KCNG4), mRNA [NM_172347]	TGAATGTGAACTCCTGGACCCCCATGTGGCCAGTGAACATGAGCTCATGAACGATGTCAA	chr16	84255869	84255928	-	FALSE	hs|16q24.1	ENST00000308251	93107	NM_172347	potassium channel, voltage gated modifier subfamily G, member 4	GO:0005251|GO:0005886|GO:0008076|GO:0007268|GO:0051260|GO:0034765|GO:0016021|GO:0071805	NM_172347	THC2486940
GOLGA6L4	0.000503231	2.09395	9.55589	9.6136	9.9521	9.06394	9.28158	9.92858	7.39056	8.31657	9.07164	8.12908	8.7295	8.68421	8.52948	8.83451	golgin A6 family-like 4 [Source:HGNC Symbol;Acc:HGNC:27256] [ENST00000515814]	CTTAGACAGTGAGGGGGGACAGAACATCTCCATGTGCACTCTCATCTCTTGCAGTCAGCA	chr15	84907026	84907085	+	FALSE	hs|15q25.2	ENST00000515814	643707	NA	golgin A6 family-like 4	NA	XM_006720532	THC2514224
SLC51A	0.00068287	5.89399	6.15588	7.07823	6.63814	6.30995	6.56027	6.13666	1.19575	0.639999	1.61147	2.22857	2.73587	0.710761	4.48152	6.36135	Homo sapiens solute carrier family 51, alpha subunit (SLC51A), mRNA [NM_152672]	ACGAATGTACTACCGAAGGAAAGACCACAAGGTTGGGTATGAAACTTTCTCTTCTCCAGA	chr3	195959986	195960045	+	FALSE	hs|3q29	ENST00000475271	200931	NM_152672	solute carrier family 51, alpha subunit	GO:0043234|GO:0005215|GO:0046982|GO:0005886|GO:0015721|GO:0006810|GO:0005789|GO:0016021|GO:0042803	NM_152672	THC2475735
TTCCTGCCTTCTAAAATGGCTCTACTTGTAAGATTCTGAAGATTCCATTAGAAATACTTG	0.018233	0.36597	8.13999	7.25937	8.90359	7.98055	6.60648	7.01629	8.33868	7.05297	8.99725	9.72368	10.4316	9.48022	8.5985	9.61013	chrUn_gl000214	51681	51740	+	FALSE	NA	NA	NA	NA	NA	NA	NA	NA	NA	NA
WEE2-AS1	0.00146494	2.12116	5.71454	5.30844	5.06347	6.16335	5.3881	6.12607	3.98278	4.55027	3.68612	4.68384	5.66513	4.61443	4.21746	4.49578	Homo sapiens WEE2 antisense RNA 1 (WEE2-AS1), long non-coding RNA [NR_015392]	CTTGATATTTGCCCATCACATTTCTCATTTCAAAGTGCTCATAAAATTGTATCTCATGGG	chr7	141404209	141404268	-	FALSE	hs|7q34	NA	285962	NR_015392	WEE2 antisense RNA 1	NA	NR_015392	THC2479968
BHLHE40	0.00643586	2.41076	9.5057	9.1056	7.76551	9.44253	9.44138	9.56992	8.4567	8.14624	8.42937	8.30892	8.52794	6.49039	7.1809	6.85994	Homo sapiens basic helix-loop-helix family, member e40 (BHLHE40), mRNA [NM_003670]	AACAGAACTAGACTCAGTTTTCAATTCCATCCTAAAACTCCTTTTAACCAAGCTTAGCTT	chr3	5026260	5026319	+	FALSE	hs|3p26.1	ENST00000256495	8553	NM_003670	basic helix-loop-helix family, member e40	GO:0005515|GO:0001191|GO:0003700|GO:0006366|GO:0003705|GO:0000981|GO:0005634|GO:0042803|GO:0043433|GO:0043153|GO:0001102|GO:0006355|GO:0005794|GO:0046982|GO:0003714|GO:0019904|GO:0005730|GO:0043426|GO:0043425|GO:0070888|GO:0000122|GO:0032922|GO:0001078|GO:0007623|GO:0005654|GO:0045892	NM_003670	THC2468917
OGFR	0.018027	2.92756	17.4612	16.927	17.1765	15.2645	17.3188	15.4078	15.5927	15.4403	15.4236	15.2383	14.2759	15.45	15.4951	14.9347	Homo sapiens opioid growth factor receptor (OGFR), mRNA [NM_007346]	TGTGTCTTCCCCACCCAGCTCTCCCCTGCGCCCCTGTCTTTGTAAATTGACCCTTCTGGA	chr20	61445213	61445272	+	FALSE	hs|20q13.33	ENST00000370461	11054	NM_007346	opioid growth factor receptor	GO:0005737|GO:0016020|GO:0005634|GO:0038003|GO:0005575|GO:0001558|GO:0004985	NM_007346	NP208924
CT45A1	0.00504111	67.5138	3.87041	9.97738	7.3356	3.5461	9.22076	4.62046	0.551591	0.56345	0.563602	0.598896	2.77881	0.649858	0.98163	4.28868	Homo sapiens cancer/testis antigen family 45, member A1 (CT45A1), mRNA [NM_001017417]	CGTAAATTAGTGAAGGAACTCCGATGCGTTGGACAAAAATATGAAAAAATCTTCGAAATG	chrX	134889533	134889973	+	FALSE	hs|Xq26.3	ENST00000620885	541466	NM_001017417	cancer/testis antigen family 45, member A1	NA	NM_001017417	THC2689224
GLT8D2	0.00370074	2.29826	9.4688	10.0115	9.71838	10.4778	10.2443	10.3317	6.86469	8.18423	9.76456	9.50479	8.02619	8.90844	8.97114	9.05135	Homo sapiens glycosyltransferase 8 domain containing 2 (GLT8D2), mRNA [NM_031302]	ACTCAATCACCATAGCTGATATAACTCTACCCTTAAAATATTCCCTGTATAGAAATGTGG	chr12	104383145	104383204	-	FALSE	hs|12q23.3	ENST00000548660	83468	NM_031302	glycosyltransferase 8 domain containing 2	GO:0016757|GO:0008152|GO:0016021	NM_031302	THC2480698
TRIM7	0.000737527	0.271803	5.91826	6.06962	6.35321	6.90802	6.31759	6.48647	8.31696	8.39547	7.89052	8.73593	8.73299	6.1821	7.35909	8.86373	Homo sapiens tripartite motif containing 7 (TRIM7), transcript variant 2, mRNA [NM_203297]	AGCTCTGCCTTGAGAGGTTGTGGGACCTCTGGATCCAGCTGACCTGACAGGTCATCTACT	chr5	180621674	180621733	-	FALSE	hs|5q35.3	ENST00000393319	81786	NM_203297	tripartite motif containing 7	GO:0005737|GO:0008270|GO:0005634	NM_203297	THC2516288
MYOM2	0.0313655	0.31394	7.44016	8.09106	7.95704	8.53691	8.23392	6.29798	8.99036	11.4797	7.77577	9.36851	8.9187	7.58937	8.84339	9.57157	Homo sapiens myomesin 2 (MYOM2), mRNA [NM_003970]	ACCCGTCTAAGGGAGAAAGCTAATGTTTTCCACAAGACTGAACAACGTGTATTTACACGA	chr8	2093070	2093129	+	FALSE	hs|8p23.3	ENST00000520298	9172	NM_003970	myomesin 2	GO:0005739|GO:0005515|GO:0032982|GO:0006936|GO:0008307|GO:0031430	NM_003970	THC2644431
PCOLCE	0.000707737	3.36849	10.6026	10.5023	10.7479	9.48603	11.2345	9.88305	8.0037	7.92717	7.36355	7.62369	8.24444	9.73417	10.1977	8.18154	Homo sapiens procollagen C-endopeptidase enhancer (PCOLCE), mRNA [NM_002593]	CTCGTCCAGTTCGTCTCAGATCTCAGTGTCACCGCTGATGGCTTCTCAGCCTCCTACAAG	chr7	100204067	100204126	+	FALSE	hs|7q22.1	ENST00000486440	5118	NM_002593	procollagen C-endopeptidase enhancer	GO:0031012|GO:0016504|GO:0005515|GO:0010952|GO:0005518|GO:0006508|GO:0007275|GO:0008201|GO:0005615|GO:0070062	NM_002593	THC2582637
SOX5	0.00830315	0.425745	5.74995	5.28487	7.32944	6.34314	6.99353	7.14673	8.43502	7.34621	7.608	7.70652	8.54712	7.21287	7.80574	7.86106	Homo sapiens SRY (sex determining region Y)-box 5 (SOX5), transcript variant 2, mRNA [NM_152989]	TACTGCAACTAGTAGCTTGATGTGCTATAGTTTTCACTCCAGTCATCATTTTCCTATCTC	chr12	23685294	23685353	-	FALSE	hs|12p12.1	ENST00000451604	6660	NM_152989	SRY (sex determining region Y)-box 5	GO:0005515|GO:2000741|GO:0003700|GO:0006366|GO:0044212|GO:0046982|GO:0051216|GO:0048709|GO:0000981|GO:0071560|GO:0021953|GO:0001701|GO:0045165|GO:0045944|GO:0061036|GO:0032332|GO:0045892|GO:0060164	NM_152989	THC2472775
GBP3	0.0131859	2.05286	11.2732	10.9608	11.0191	10.5997	10.2503	10.0335	9.83257	8.4083	8.02696	9.71714	10.8872	10.2605	9.9665	7.99107	Homo sapiens guanylate binding protein 3 (GBP3), mRNA [NM_018284]	GAGATGCCAAGGTGAAAGTACCCAACTTCAAAATGAGATACAAAAGCTACAGAAGACCCT	chr1	89473453	89473512	-	FALSE	hs|1p22.2	ENST00000235878	2635	NM_018284	guanylate binding protein 3	GO:0005515|GO:0051607|GO:0005737|GO:0016020|GO:0008152|GO:0003924|GO:0005525	NM_018284	THC2572789
TAC3	0.00279011	5.94727	6.314	6.34773	8.49693	5.89033	6.58958	5.06553	3.84428	3.6711	3.72535	3.9839	5.56787	3.8451	4.28501	4.46179	Homo sapiens tachykinin 3 (TAC3), transcript variant 1, mRNA [NM_013251]	CCAACCCCAATGGGCATTGACTGTAGAATACCCTAGAGTTCCTGTAGTGTCCTACATTAA	chr12	57403836	57403895	-	FALSE	hs|12q13.3	ENST00000393867	6866	NM_013251	tachykinin 3	GO:0005515|GO:0007565|GO:0007218|GO:0005102|GO:0007217|GO:0005576|GO:0005615|GO:0070062	NM_013251	NP847000
WBSCR27	0.000171933	3.3004	7.44372	7.71188	9.00664	7.71707	7.55792	7.85753	6.02116	5.76435	5.31522	6.47249	6.23472	7.13204	5.80746	6.6171	Homo sapiens Williams Beuren syndrome chromosome region 27 (WBSCR27), mRNA [NM_152559]	TCTGCCAAGGATGGCTTCATCTCCGGCATTGTCTACCTGTACCGAAAGTGGAAGGCGACC	chr7	73249089	73249148	-	FALSE	hs|7q11.23	ENST00000297873	155368	NM_152559	Williams Beuren syndrome chromosome region 27	NA	NM_152559	THC2479569
PKP3	1.49e-08	27.2345	12.6262	12.7029	13.319	12.6216	12.6637	11.9511	7.60884	7.83302	7.44456	7.47896	6.58304	7.80072	9.47066	7.24926	Homo sapiens plakophilin 3 (PKP3), transcript variant 1, mRNA [NM_007183]	GCTCAAGGCTGCTCTGGTGTATGGGGTGGTGACCCAGTCACATTGGCAGAGGTGGGGGTT	chr11	404785	404844	+	FALSE	hs|11p15.5	ENST00000331563	11187	NM_007183	plakophilin 3	GO:0030057|GO:0016337|GO:0005886|GO:0005911|GO:0005634|GO:0002159|GO:0090002|GO:0050839	NM_007183	THC2467403
CFB	0.00153634	5.60898	10.3182	9.64173	8.96867	7.13625	9.97648	8.25451	5.28349	4.3771	4.22997	5.42529	6.33665	7.72685	9.00067	4.98325	Homo sapiens complement factor B (CFB), mRNA [NM_001710]	AAGGAGGTCTACATCAAGAATGGGGATAAGAAAGGCAGCTGTGAGAGAGATGCTCAATAT	chr6	31918992	31919147	+	FALSE	hs|6p21.33	ENST00000425368	629	NM_001710	complement factor B	GO:0006957|GO:0030449|GO:0006956|GO:0005886|GO:0004252|GO:0001848|GO:0045087|GO:0006508|GO:0072562|GO:0005576|GO:0005615|GO:0070062	NM_001710	THC2532851
CDCP1	0.00292374	3.97801	5.40226	6.82462	6.63704	5.4133	7.84076	6.18467	2.30047	1.30988	2.39183	3.29876	6.90262	4.77266	4.75597	2.18068	Homo sapiens CUB domain containing protein 1 (CDCP1), transcript variant 1, mRNA [NM_022842]	CTTAATTTGTGGATGATACAGAAAGCCAGGCTTTGGGATACAAGTTCTTTCCTCTTCATT	chr3	45123839	45123898	-	FALSE	hs|3p21.31	ENST00000296129	64866	NM_022842	CUB domain containing protein 1	GO:0005886|GO:0005576|GO:0016021	NM_022842	THC2461588
Homo sapiens, clone IMAGE:4344826, mRNA. [BC033590]	1.78e-06	7.71246	9.61165	9.98649	9.31036	8.61088	9.12409	8.89172	5.90873	5.34889	5.22877	6.0333	6.44449	7.30416	7.36309	5.7271	AGACACATTTCTCCTACCACGAGTAATCAAAAACACTATGAAACTGTAATATGGGCCGGG	chr17	60703943	60704002	-	FALSE	hs|17q23.2	NA	NA	BC033590	NA	NA	NA	THC2493536	NA
SERTM1	0.00752308	7.75986	10.0285	8.87531	8.14874	5.84546	8.2502	6.32855	6.05791	5.88777	6.2928	5.97075	3.60096	5.10898	5.89033	3.58632	Homo sapiens serine-rich and transmembrane domain containing 1 (SERTM1), mRNA [NM_203451]	AGTGGGTTGGGTGTCATTATGTAGTATAAAAACTGGACTAGATAAACTGCTATTTTAGAG	chr13	37271323	37271382	+	FALSE	hs|13q13.3	ENST00000315190	400120	NM_203451	serine-rich and transmembrane domain containing 1	GO:0016021	NM_203451	THC2476620
AACCATTATAAGTATGACGCGAAGGTCGTACATCAGGCTATTACACCTTTTCATTATACG	0.014571	4.63996	4.90284	3.75996	2.67598	6.4472	3.87772	3.19597	1.96967	4.04714	2.63711	0.639071	2.02436	0.725125	1.56563	3.22497	chr10	10504683	10504742	-	FALSE	hs|10p14	NA	NA	NA	NA	NA	NA	THC2725746	NA	NA
SPATS2L	3.36e-05	4.43862	12.4905	12.7381	12.3593	12.2788	12.4638	11.9119	10.2443	10.1167	8.70955	9.8069	9.52782	11.3366	10.8678	9.77472	Homo sapiens spermatogenesis associated, serine-rich 2-like (SPATS2L), transcript variant 1, mRNA [NM_015535]	CTGAAGATCAGAGGCTCAGTTAGCAACCTGTGTTGTAGCAGTGATGTCAGTCCATTGATT	chr2	201343028	201343087	+	FALSE	hs|2q33.1	ENST00000409988	26010	NM_015535	spermatogenesis associated, serine-rich 2-like	GO:0043234|GO:0005737|GO:0005730|GO:0005634	NM_015535	THC2785158
OCLN	0.00298509	4.17225	5.55602	5.62994	4.95113	6.34498	6.19914	4.91974	5.23876	4.46205	3.55458	0.728005	0.727017	1.83449	4.30462	0.754465	Homo sapiens occludin (OCLN), transcript variant 1, mRNA [NM_002538]	TACAATAGACTGAAGCAAGTGAAGGGATCTGCAGATTACAAAAGTAAGAAGAATCATTGC	chr5	68847386	68849429	+	FALSE	hs|5q13.2	ENST00000617792	100506658	NM_002538	occludin	GO:0005515|GO:0030054|GO:0005886|GO:0019904|GO:0006915|GO:0030139|GO:0031410|GO:0032259|GO:0045216|GO:0006921|GO:0016327|GO:0005829|GO:0016324|GO:0006461|GO:0070830|GO:0005198|GO:0005911|GO:0008119|GO:0046500|GO:0046498|GO:0005923|GO:0016021	NM_002538	THC2710343
PDLIM5	0.00126688	2.47499	10.8408	9.83379	10.9096	10.0433	10.3046	9.83509	7.73736	8.60177	8.84763	8.28137	9.46636	10.4059	8.60045	8.75415	Homo sapiens PDZ and LIM domain 5 (PDLIM5), transcript variant 1, mRNA [NM_006457]	ACAAGCCCCTGTGTAAGAAACATGCTCATTCTGTGAATTTTTGAAAGTCAACAGTTCAGG	chr4	95585175	95585234	+	FALSE	hs|4q22.3	ENST00000380176	10611	NM_006457	PDZ and LIM domain 5	GO:0043005|GO:0051963|GO:0030018|GO:0030054|GO:0042805|GO:0014069|GO:0003779|GO:0015629|GO:0005829|GO:0047485|GO:0016020|GO:0045211|GO:0005080|GO:0008270|GO:0061001	NM_006457	NP1154682
LOC101927085	6.18e-06	0.333626	7.32676	7.57308	7.51099	7.39877	7.47374	7.67672	9.4045	9.35606	9.21959	9.49686	8.3391	8.79492	9.05692	8.57679	PREDICTED: Homo sapiens uncharacterized LOC101927085 (LOC101927085), mRNA [XM_005276020]	CCAGCGGGTTCCCTCTTTCTCTTGAACTATAATAATACCCTACACATGTGCGTAGAACAT	chr8	82191954	82192013	-	FALSE	hs|8q21.13	NA	101927085	XM_005276020	uncharacterized LOC101927085	NA	XM_005276020	THC2514053
HS3ST4	0.000153483	4.84708	7.40439	6.1495	5.26541	5.657	6.12787	6.01669	3.06953	3.2661	3.70562	2.81971	2.79226	4.37912	5.70819	3.24759	Homo sapiens heparan sulfate (glucosamine) 3-O-sulfotransferase 4 (HS3ST4), mRNA [NM_006040]	ATTAAACTGTCATTTCTCCCGCTAAATGAAAACCGTGTTGTTATAAAGCTTAATGCAACC	chr16	26148944	26149003	+	FALSE	hs|16p12.1	ENST00000331351	9951	NM_006040	heparan sulfate (glucosamine) 3-O-sulfotransferase 4	GO:0000139|GO:0016021|GO:0008467|GO:0030201	NM_006040	THC2474074
UBE2QL1	0.000496158	0.350621	4.78164	4.06837	3.69416	3.93289	4.3483	3.68851	5.65835	5.06581	4.98999	6.61553	6.43158	5.27847	5.15515	4.78581	Homo sapiens ubiquitin-conjugating enzyme E2Q family-like 1 (UBE2QL1), mRNA [NM_001145161]	ACGCATGTGGCATAAATCAACAGGAAAGAAATGTTTACCACTGGAAGATGGTGAGTGCAT	chr5	6496681	6496740	+	FALSE	hs|5p15.31	NA	134111	NM_001145161	ubiquitin-conjugating enzyme E2Q family-like 1	GO:0016567|GO:0016874|GO:0005524	NM_001145161	THC2637644
ACCAAAAAATTCATGAGAGATCCAATTAATTCTGGTGAAAAAGGATTGACCCTTGAAGGA	0.000283159	0.219435	8.0172	8.30201	6.53303	8.80126	7.68136	8.00281	10.4119	11.127	10.5586	10.4583	8.62875	9.35482	9.87473	10.0602	NA	NA	NA	NA	FALSE	NA	NA	NA	NA	NA	NA	NA	NA	NA	NA
AGATCTGGTCATCAACACTCCTGTTTAAACTTGCAAAGCCATCATCTCTGTATTGTGAGT	0.0275523	2.48193	9.20728	8.62288	8.54257	7.57328	8.2253	7.91215	7.67299	7.67324	3.76385	7.55036	7.91627	5.81601	7.69473	2.96963	chr7	149848576	149848635	-	FALSE	hs|7q36.1	NA	NA	NA	NA	NA	NA	THC2668308	NA	NA
TMEM56	0.00012936	3.19637	7.06218	6.97314	8.28364	7.77328	8.01181	7.68075	5.09824	5.80497	6.89462	6.09476	6.46068	5.98163	4.98001	5.96206	Homo sapiens transmembrane protein 56 (TMEM56), transcript variant 2, mRNA [NM_152487]	AGGCTTAAGACAGATTATAGACCTCCTTAAGAGATGAGTTTCTTCTTCTAAAAATGCATG	chr1	95658415	95658474	+	FALSE	hs|1p21.3	ENST00000370203	148534	NM_152487	transmembrane protein 56	GO:0008150|GO:0003674|GO:0016021|GO:0005575	NM_152487	THC2474609
H1F0	0.0074563	0.39225	10.8826	10.4711	9.60784	10.6497	11.7106	10.3268	12.3328	12.7065	11.8442	12.2967	12.8019	10.224	11.4081	11.7766	Homo sapiens H1 histone family, member 0 (H1F0), mRNA [NM_005318]	AGACTTACTGCAGTCGATTTGGGATTTGCTAAGTAGTTTTACAGAGCTAGATCTGTGTGC	chr22	38203147	38203206	+	FALSE	hs|22q13.1	ENST00000340857	3005	NM_005318	H1 histone family, member 0	GO:0005515|GO:0000790|GO:0005794|GO:0005719|GO:0006334|GO:0006915|GO:0005634|GO:0015629|GO:0006921|GO:0031490|GO:0006309|GO:0005654|GO:0000786	NM_005318	THC2513918
BAIAP2L1	5.21e-06	2.89999	6.33338	6.40232	6.99353	6.31826	7.0256	6.52383	4.91328	4.49459	4.97477	4.99434	4.73882	5.97845	5.04127	5.11996	Homo sapiens BAI1-associated protein 2-like 1 (BAIAP2L1), mRNA [NM_018842]	TCGGTGGCAGGAGACCTGTGTTGATGCCATCAAAGTGCCAGAGAAAATCATGAATATGAT	chr7	97941488	97941547	-	FALSE	hs|7q21.3	ENST00000462558	55971	NM_018842	BAI1-associated protein 2-like 1	GO:0007009|GO:0005886|GO:0046626|GO:2000251|GO:0003779|GO:0015629|GO:0005829|GO:0009617|GO:0005737|GO:0030838|GO:0005654|GO:0070064|GO:0070062	NM_018842	THC2462376
LAMA4	0.013204	0.321455	9.3236	9.08826	9.93087	10.8576	10.9373	10.6908	11.6017	11.3132	11.3289	11.5308	10.5788	13.8219	11.4344	10.7207	Human laminin alpha 4 chain (LAMA4*-1) mRNA, complete cds. [U77706]	GTGACTACTGACGGAGAAGACCCAGGTTTTTCAGCTTCTGCCCTATCGTTCATTCTCAGC	chr6	112535215	112537571	-	FALSE	hs|6q21	NA	3910	U77706	laminin, alpha 4	GO:0005515|GO:0030334|GO:0005102|GO:0005605|GO:0005606|GO:0005576|GO:0030155|GO:0005604|GO:0031012|GO:0045995|GO:0030198|GO:0007155|GO:0070062|GO:0005201	NA	THC2487679
TPD52L1	0.000513841	5.9987	12.4024	12.049	11.3987	11.4326	11.3885	10.1084	6.4278	7.23466	6.28259	8.2584	7.53983	10.7391	10.5324	7.67119	Homo sapiens tumor protein D52-like 1 (TPD52L1), transcript variant 2, mRNA [NM_001003395]	CTCCTTTATGATGTGCATGTCCTTGAAGGCTGAATGAACAGTCCCTTTCAGTTCAGCAGA	chr6	125584445	125584504	+	FALSE	hs|6q22.31	ENST00000392482	7164	NM_001003395	tumor protein D52-like 1	GO:0005515|GO:0048471|GO:0005737|GO:0043281|GO:0046982|GO:0043406|GO:0000086|GO:2001235|GO:0046330|GO:0042803|GO:0042802	NM_001003395	THC2614556
ERV3-2	0.000218588	0.455964	7.12253	6.85592	7.176	7.16329	7.18002	7.2894	8.20662	8.27386	8.31923	8.07125	7.54393	9.11003	8.35108	7.71892	Homo sapiens mRNA for KIAA1466 protein, partial cds. [AB040899]	AAGAATTTAAGTAGCCCCCCTGAAGTTAGAGTTAAAGAAGGATATTAACTGCCAGTCCCA	chr7	134866325	134866384	+	FALSE	hs|7q33	NA	57612	AB040899	endogenous retrovirus group 3, member 2	NA	NA	THC2601169
MARVELD3	1.18e-05	5.07919	2.96005	4.02751	4.33687	3.35649	3.96373	3.77952	0.715194	1.33052	0.804662	0.738656	0.760978	1.4608	3.05723	0.744256	Homo sapiens MARVEL domain containing 3 (MARVELD3), transcript variant 1, mRNA [NM_001017967]	ATGTGAACGCACATTGTTTCTCTCAAAAAGACAGGTCTTTTAAAACTCCGCATTAGACAA	chr16	71674948	71675007	+	FALSE	hs|16q22.2	ENST00000299952	91862	NM_001017967	MARVEL domain containing 3	GO:0005515|GO:0046329|GO:0070830|GO:0050680|GO:0031435|GO:0006970|GO:0031410|GO:0016021|GO:0005923|GO:0045216|GO:0010633	NM_001017967	THC2474488
SHISA7	7e-05	0.375213	5.57543	5.28266	5.9351	5.65861	5.92715	6.24627	7.80724	7.45994	7.3443	7.0804	6.07176	7.43312	7.10883	6.8416	Homo sapiens shisa family member 7 (SHISA7), mRNA [NM_001145176]	CCCCAGCACCCAATGCACAATCTTCCCTCAATTCTCTTTGTACATAGCCATGTTGCGGGG	chr19	55941062	55941121	-	FALSE	hs|19q13.42	ENST00000376325	729956	NM_001145176	shisa family member 7	GO:0016021	NM_001145176	THC2475059
ITPR2	0.000371009	2.64608	7.232	6.64702	6.63212	6.37504	7.12754	5.83091	4.52634	4.87663	5.67372	4.68068	4.9278	5.38401	5.65359	6.03443	Homo sapiens inositol 1,4,5-trisphosphate receptor, type 2 (ITPR2), mRNA [NM_002223]	GCTATAGGGTTTGCTCTGACAATTTTTAAAGCTTTTGGATTGTTCTAACATAGCTTAAGC	chr12	26490863	26490922	-	FALSE	hs|12p12.1	ENST00000381340	3709	NM_002223	inositol 1,4,5-trisphosphate receptor, type 2	GO:0005886|GO:0007202|GO:0044281|GO:0007173|GO:0006810|GO:0031095|GO:0005938|GO:0001666|GO:0048010|GO:0048011|GO:0005220|GO:0048016|GO:0015085|GO:0030168|GO:0033017|GO:0043235|GO:0007165|GO:0071361|GO:0006112|GO:0050796|GO:0016020|GO:0008543|GO:0007596|GO:0045087|GO:0070588|GO:0005789|GO:0016021|GO:0071320|GO:0035091|GO:0038096|GO:0038095	NM_002223	THC2677408
ribosomal protein L18a pseudogene 8 [Source:HGNC Symbol;Acc:HGNC:36984] [ENST00000486071]	0.00153148	0.189137	8.62936	8.80168	8.34086	9.28563	8.79725	8.79751	11.4637	12.1459	11.0078	11.0052	8.46672	11.8391	11.3389	9.67386	CCCTTCCGGTACTTTGCATATCAGTTAAAGAAGATGAAGTCTTTAGGGGAGATTGTCTAC	chr3	96338274	96338333	+	FALSE	hs|3q11.2	ENST00000486071	NA	NA	NA	NA	NA	NA	NA
UGT8	0.00284344	0.407675	5.04302	5.28923	5.17139	4.92381	5.23481	4.81352	7.07736	6.34423	6.29463	7.08079	4.77554	5.88222	6.51951	5.89952	Homo sapiens UDP glycosyltransferase 8 (UGT8), transcript variant 2, mRNA [NM_003360]	TGCCGCTGTCCATCAGATCTCCTTTTGTCAGTATTTTTTACTGGATATTGCCTTTGTGCT	chr4	115597201	115597260	+	FALSE	hs|4q26	ENST00000394511	7368	NM_003360	UDP glycosyltransferase 8	GO:0006682|GO:0052696|GO:0002175|GO:0030913|GO:0008489|GO:0015020|GO:0007417|GO:0032870|GO:0043231|GO:0003851|GO:0009813|GO:0048812|GO:0007010|GO:0007422|GO:0008088|GO:0016021	NM_003360	THC2470851
HOXB13	0.0205394	0.181521	6.38755	6.02243	7.12167	7.21331	7.69694	7.20299	8.36343	8.20047	8.09727	8.09727	6.90565	11.9284	8.41706	8.13543	Homo sapiens homeobox B13 (HOXB13), mRNA [NM_006361]	CATGTGACAGCCCACTCCACCAGGGTTCCCAAAGAACCTGGCCCAGTCATAATCATTCAT	chr17	46803899	46803958	-	FALSE	hs|17q21.32	ENST00000290295	10481	NM_006361	homeobox B13	GO:0043565|GO:0005667|GO:0006355|GO:0008544|GO:0060743|GO:0009611|GO:0005654|GO:0001525|GO:0033574|GO:0040008|GO:0006351|GO:0060527	NM_006361	THC2462960
GULP1	0.000567068	3.3765	4.48093	4.8181	5.88194	5.69013	5.27176	4.70952	4.80157	3.86716	2.39659	3.11649	1.89747	3.72157	3.47768	2.2459	Homo sapiens GULP, engulfment adaptor PTB domain containing 1 (GULP1), transcript variant 1, mRNA [NM_016315]	AACTGATAGAAGAATTCTGATGGCAACTGTATGATAGAAGCTATATAAAGTCAAGTGTCC	chr2	189248525	189248584	+	FALSE	hs|2q32.1	ENST00000409927	51454	NM_016315	GULP, engulfment adaptor PTB domain containing 1	GO:0007165|GO:0005737|GO:0006869|GO:0006915|GO:0004871|GO:0006911	NM_016315	NP1205527
ASB16-AS1	0.000648335	0.261952	8.47639	8.23749	8.77485	8.74621	8.84763	8.90752	11.1335	11.1407	10.7925	10.6662	8.76019	10.7583	10.8728	9.25203	Homo sapiens ASB16 antisense RNA 1 (ASB16-AS1), transcript variant 1, long non-coding RNA [NR_049729]	TTGCCTTTCCACCCCTCTCAGCTTGAGGTCCTACCTGGTGTCCTCCATGAGAATCATACA	chr17	42253972	42254031	-	FALSE	hs|17q21.31	NA	339201	NR_049729	ASB16 antisense RNA 1	NA	NR_049729	THC2473822
Homo sapiens, clone IMAGE:3681561, mRNA. [BC029452]	0.000145075	0.364718	3.87577	3.34126	3.93208	3.80285	4.05668	3.77824	5.93787	5.61472	5.25311	5.08465	4.07866	5.63051	5.05471	4.72747	TTCACCACCCCACCAGGTAACAGAGATCTCTGGAGGTGAAACATTGCTCTGAACTGGCAT	chr2	167108407	167108466	+	FALSE	hs|2q24.3	NA	NA	BC029452	NA	NA	NA	THC2627786	NA
AQP4	0.00099942	15.3992	6.82238	5.395	5.71016	3.03939	5.35938	2.63232	0.581246	0.603834	0.663788	0.592575	0.619019	0.612603	3.59807	0.581075	Homo sapiens aquaporin 4 (AQP4), transcript variant a, mRNA [NM_001650]	AGCAATTGGATTTTCTGTTGCAATTGGACATTTATTTGCAATCAATTATACTGGTGCCAG	chr18	24440797	24441134	-	FALSE	hs|18q11.2	ENST00000584088	361	NM_001650	aquaporin 4	GO:0005886|GO:0007605|GO:0009992|GO:0070295|GO:0016323|GO:0005737|GO:0034220|GO:0005911|GO:0071392|GO:0015250|GO:0015793|GO:0006810|GO:0005372|GO:0051260|GO:0006833|GO:0015254|GO:0009314|GO:0007565|GO:0030315|GO:0051384|GO:0042538|GO:0015670|GO:0055085|GO:0003091|GO:0043234|GO:0071346|GO:0005887|GO:0050891|GO:0015288|GO:0009897	NM_001650	NP1079027
GPR68	0.00614189	0.340279	11.0802	11.5488	11.6936	11.6373	11.7837	12.3314	14.315	13.2413	12.7729	13.6051	11.6334	11.5543	13.2874	13.7716	Homo sapiens G protein-coupled receptor 68 (GPR68), transcript variant 2, mRNA [NM_003485]	TACTGTCAAGAGTTGTATTTTTGTATTGTCCTTTTTGCCAAGTCTACATGTGTTGACTCT	chr14	91698929	91698988	-	FALSE	hs|14q32.11	ENST00000535815	8111	NM_003485	G protein-coupled receptor 68	GO:0006954|GO:0045656|GO:0007186|GO:0005886|GO:2001206|GO:0035774|GO:0005887|GO:0004930|GO:0071467	NM_003485	THC2472682
ASIC2	0.000924224	0.193082	7.1221	7.38111	7.74015	10.0763	7.47769	8.17324	11.6361	10.4554	10.2411	10.4648	10.3991	11.0547	10.7624	10.8487	Homo sapiens acid sensing (proton gated) ion channel 2 (ASIC2), transcript variant MDEG2, mRNA [NM_183377]	ATGGTGCCCATGTCGTTCTTCTCTCCCTGTGACACAGCTTGTACAGTCTGATTCTTTTTA	chr17	31340283	31340342	-	FALSE	hs|17q11.2	ENST00000225823	40	NM_183377	acid sensing (proton gated) ion channel 2	GO:0010468|GO:0005515|GO:0005886|GO:0007605|GO:0007268|GO:0035418|GO:0045202|GO:2001259|GO:0071468|GO:0003026|GO:0019229|GO:0034220|GO:0043197|GO:0042391|GO:0043025|GO:0035725|GO:0051965|GO:0022839|GO:0043066|GO:0005248|GO:0007417|GO:0050915|GO:0055085|GO:0015672|GO:0015280|GO:0030193|GO:0005887|GO:0007422|GO:0071229|GO:0050974|GO:0007602	NM_183377	THC2473783
CCNO	0.0123355	3.06712	10.2749	9.57766	10.2894	10.0039	9.47412	11.0732	3.34314	7.21123	9.53975	6.14772	10.4062	7.83604	8.56555	7.40156	Homo sapiens cyclin O (CCNO), transcript variant 1, mRNA [NM_021147]	TTCAGGACCTGCTTGGTCAGCTGCAGGTTGTAAATAGTGTACGATACTAGCATCTGGTAT	chr5	54527051	54527110	-	FALSE	hs|5q11.2	ENST00000501463	10309	NM_021147	cyclin O	GO:0004844|GO:0042384|GO:0007049|GO:0005737|GO:0042493|GO:0006284|GO:0005654|GO:0051301	NM_021147	THC2621896
PURB	0.00215123	0.418308	9.20025	9.25418	9.66189	9.1785	9.22556	9.49174	11.2875	10.9313	11.0357	10.7265	9.4617	10.1261	10.7055	9.48103	Homo sapiens purine-rich element binding protein B (PURB), mRNA [NM_033224]	CAACAAATACGGGGTGTTTCTGCGAGTGAGCGAGGTGAAGCCGTCCTACCGCAATGCCAT	chr7	44924175	44924234	-	FALSE	hs|7p13	ENST00000395699	5814	NM_033224	purine-rich element binding protein B	GO:0003700|GO:0003690|GO:0003697|GO:0046332|GO:0045637|GO:0005654|GO:0005634|GO:0000122|GO:0003729|GO:0005662|GO:0006351|GO:0008134	NM_033224	THC2474152
TMEM35	0.0060994	3.03484	9.1	9.18915	8.95899	9.94496	8.64233	7.40172	7.46078	6.99422	8.9329	6.01077	5.11507	8.6523	5.90794	5.49693	Homo sapiens transmembrane protein 35 (TMEM35), mRNA [NM_021637]	GGGGGGTTGTGTGGGAAGAGTACTTATTATTGTGTTTTCTTCAGTGTAATTGTTCTTGGT	chrX	100351230	100351289	+	FALSE	hs|Xq22.1	ENST00000372930	59353	NM_021637	transmembrane protein 35	GO:0008150|GO:0003674|GO:0016023|GO:0016021|GO:0005575|GO:0005778	NM_021637	THC2466071
BTBD6	1.13e-05	2.00791	13.9701	13.774	14.0994	13.6882	13.7234	13.9029	12.4606	12.7387	12.7711	12.8379	13.2677	12.5101	12.6589	13.3701	Homo sapiens BTB (POZ) domain containing 6 (BTBD6), mRNA [NM_033271]	ATCTTCCTGCTACCCTCTTGGATTCTAAGTGGTTCCAAGCTTAACTTGAGACCTTCCCTT	chr14	105717302	105717361	+	FALSE	hs|14q32.33	ENST00000536364	90135	NM_033271	BTB (POZ) domain containing 6	GO:0000932	NM_033271	THC2462718
SAMD5	2.41e-05	6.85543	9.22076	10.1151	8.76676	9.94057	9.14746	8.31022	5.60724	6.11817	7.72685	5.42016	5.82822	6.81073	7.63632	5.27445	Homo sapiens sterile alpha motif domain containing 5 (SAMD5), mRNA [NM_001030060]	TTCGGGTTGCTAAAGCCATTATTCATAGAAAATTTCTGCCCCTACAGAAGTGTGTGCATG	chr6	147890833	147890892	+	FALSE	hs|6q24.3	ENST00000367474	389432	NM_001030060	sterile alpha motif domain containing 5	NA	NM_001030060	THC2650324
RND3	0.0361548	2.1596	9.04797	7.84791	9.68304	8.03243	9.17471	8.19337	8.53772	7.30958	5.18532	8.73029	4.55596	8.20342	8.22739	6.05282	Homo sapiens Rho family GTPase 3 (RND3), transcript variant 2, mRNA [NM_005168]	CTGTTTATTGTTGGCGCTTGTTGAAAACGAGCTTTCTTTCCCATGATAGTGCTTCGTTTT	chr2	151325107	151325166	-	FALSE	hs|2q23.3	ENST00000375734	390	NM_005168	Rho family GTPase 3	GO:0005515|GO:0030036|GO:0000139|GO:0007264|GO:0008152|GO:0003924|GO:0007155|GO:0005525|GO:0005925|GO:0070062	NM_005168	THC2463452
PMEL	6.91e-07	2.66501	6.52346	6.44259	6.32313	6.43645	6.47785	6.51746	4.59828	5.20743	5.19629	4.80683	4.83618	4.83199	5.46161	5.18668	Homo sapiens premelanosome protein (PMEL), transcript variant 3, mRNA [NM_006928]	ATCTCTGATATATAGGCGCAGACTTATGAAGCAAGACTTCTCCGTACCCCAGTTGCCACA	chr12	56348089	56349072	-	FALSE	hs|12q13.2	ENST00000549564	6490	NM_006928	premelanosome protein	GO:0005515|GO:0042470|GO:0005794|GO:0042438|GO:0005886|GO:0032438|GO:0032585|GO:0005789|GO:0005576|GO:0016021	NM_006928	THC2469768
C9orf47	6.66e-05	3.96728	3.3079	2.87714	4.07509	3.68768	3.5513	2.54475	1.51904	0.604425	0.688908	1.60633	0.588079	0.586163	2.03452	2.47228	Homo sapiens chromosome 9 open reading frame 47 (C9orf47), transcript variant 1, mRNA [NM_001001938]	GCTTTGAGGTAGGCTGGATGAACCCAGCTTAGTGAAGATGACATGAAAACCCTTAGCTAA	chr9	91610508	91610567	+	FALSE	hs|9q22.1	ENST00000375851	286223	NM_001001938	chromosome 9 open reading frame 47	GO:0005576	NM_001001938	THC2549832
ZBTB47	0.00265688	0.365784	8.76735	8.5555	8.73396	8.59983	8.69066	8.77121	10.6652	10.2845	10.1133	10.3127	8.39119	10.5302	10.4756	9.06571	Homo sapiens zinc finger and BTB domain containing 47 (ZBTB47), mRNA [NM_145166]	CTCAGCAGCCTATCCCCATGTCCTCTATGCCCCTAATTTGCTTCCTCATCTTGGAGGGTT	chr3	42706509	42706568	+	FALSE	hs|3p22.1	ENST00000232974	92999	NM_145166	zinc finger and BTB domain containing 47	GO:0006355|GO:0005634|GO:0003677|GO:0046872|GO:0006351	NM_145166	THC2483260
OR11A1	0.0063246	0.275688	8.16256	8.3779	8.6793	8.92074	8.40958	8.18073	10.8244	10.7281	10.6444	10.3929	7.81946	10.9245	10.4248	8.53284	Homo sapiens olfactory receptor, family 11, subfamily A, member 1 (OR11A1), mRNA [NM_013937]	ACATGCTCCTCCCACCTAGCTGTAGTGACCACATTCTATGGAACGCTCATGATCTTTTAT	chr6	29394639	29394698	-	FALSE	hs|6p22.1	ENST00000377149	26531	NM_013937	olfactory receptor, family 11, subfamily A, member 1	GO:0050911|GO:0004984|GO:0007186|GO:0005886|GO:0004930|GO:0016021	NM_013937	THC2487340
IGFBPL1	0.0273346	0.462145	6.48621	8.09359	8.48578	8.90776	8.38493	8.37195	10.2407	8.16702	9.24859	9.62444	9.64357	9.13872	9.72605	8.13735	Homo sapiens insulin-like growth factor binding protein-like 1 (IGFBPL1), mRNA [NM_001007563]	GTGCAAAGACAAATAATTAATGTCACACTGTCTGAAATTTTCACCAAAACCAAAAAGGCG	chr9	38406745	38406804	-	FALSE	hs|9p13.1	NA	347252	NM_001007563	insulin-like growth factor binding protein-like 1	GO:0005576|GO:0001558|GO:0005520	NM_001007563	THC2526710
KANK1	1.08e-05	2.87888	12.8481	12.6562	12.7112	12.519	12.6038	12.397	10.0803	11.311	11.0841	11.4571	11.0125	10.8798	11.6306	10.8789	Homo sapiens KN motif and ankyrin repeat domains 1 (KANK1), transcript variant 2, mRNA [NM_153186]	TTTACCGTGTCACATTTACTTTGGTCCTCTATGTATTTAAATGTTTGAAGTGCCTTAGAC	chr9	746006	746065	+	FALSE	hs|9p24.3	ENST00000382289	23189	NM_153186	KN motif and ankyrin repeat domains 1	GO:0005515|GO:0006355|GO:0030336|GO:0008013|GO:2000393|GO:0090303|GO:0046627|GO:0035024|GO:2000114|GO:0030177|GO:0005634|GO:0032587|GO:0035413|GO:0006351|GO:1900028|GO:0005737|GO:1900025|GO:0030837|GO:0010977	NM_153186	NP1165352
AGPAT2	0.000734404	3.30044	7.419	6.95123	6.45352	7.34128	6.70123	6.72371	4.47666	4.38578	3.12457	4.56584	5.96373	5.30487	4.86447	6.61667	Homo sapiens 1-acylglycerol-3-phosphate O-acyltransferase 2 (AGPAT2), transcript variant 1, mRNA [NM_006412]	TAGCACTGCCATGACAGTGATGGCCGACCTGGGCGAGCGCATGGTCAGGGAGAACCTCAA	chr9	139571128	139571467	-	FALSE	hs|9q34.3	ENST00000472820	10555	NM_006412	1-acylglycerol-3-phosphate O-acyltransferase 2	GO:0005783|GO:0001819|GO:0044281|GO:0003841|GO:0008544|GO:0001961|GO:0005789|GO:0016024|GO:0019432|GO:0016021|GO:0006644|GO:0006654|GO:0044255|GO:0046474	NM_006412	THC2551874
CATAAGAGAATTCATACTGAAAGGAAACCCTACACGTGAAGAATGTGGCAAAACTTTTAA	0.00524667	0.2747	8.85252	8.74583	9.36894	9.21938	8.41994	9.4722	11.3279	11.3744	11.4204	11.4841	8.64252	10.8597	10.9395	8.92845	chr7	56534866	56534925	+	FALSE	hs|7p11.2	ENST00000620607	NA	NA	NA	NA	NA	NA	NA	NA
PTGDS	0.00924833	4.12968	13.6481	11.1583	12.5384	12.628	11.1565	10.6764	10.3203	10.4215	9.88675	9.71403	9.20813	11.2177	10.9786	9.4207	Homo sapiens prostaglandin D2 synthase 21kDa (brain) (PTGDS), mRNA [NM_000954]	CCGCCAAAGCACCCCTGCCCACTCGGGCTTCATCCTGCACAATAAACTCCGGAAGCAAGT	chr9	139876130	139876189	+	FALSE	hs|9q34.3	ENST00000371625	5730	NM_000954	prostaglandin D2 synthase 21kDa (brain)	GO:0005791|GO:0019369|GO:0019371|GO:0005215|GO:0048471|GO:0031965|GO:0005504|GO:0005794|GO:0045187|GO:0004667|GO:0051384|GO:0005576|GO:0044281|GO:0005615|GO:0001516|GO:0005501|GO:0005789|GO:0006810|GO:0070062	NM_000954	THC2777090
AAGCCATTCCCCGGCTCCTCACGTAGCTTTGACCTCTTTGTAGAACCCTTGCTTCTTCAT	0.00266385	0.428188	7.33536	6.98596	7.33349	7.3843	7.3183	7.39226	8.94701	8.87094	8.53792	8.49012	7.02118	9.0762	8.54157	7.67878	chr17	42023954	42024013	-	FALSE	hs|17q21.31	NA	NA	NA	NA	NA	NA	NA	NA	NA
XIRP1	0.00281831	0.311648	4.18613	3.92318	4.76946	3.46687	3.04452	2.72741	6.60624	5.05556	5.91722	5.80646	4.49804	5.58844	5.25284	3.85683	Homo sapiens xin actin-binding repeat containing 1 (XIRP1), transcript variant 1, mRNA [NM_194293]	ATGAGGAGGTGGACCAGTTTGGGAACACAGTCCTCATGTCTTCCACCACAGTCACCGAGC	chr3	39225563	39225622	-	FALSE	hs|3p22.2	ENST00000421646	165904	NM_194293	xin actin-binding repeat containing 1	GO:0005916|GO:0005515|GO:0008285|GO:0042391|GO:0045214|GO:0055013|GO:0003779	NM_194293	NP1163251
GCATTTGAACACATGAACCCTATGATGTCCTGCTGTGAGAGAGAACAATGTCCCAATTTT	0.000502945	0.486825	5.69723	5.88857	6.57521	6.35542	5.90424	6.59939	6.52383	7.29991	7.37758	7.24335	7.90776	7.3183	6.8664	7.08258	chr1	779275	779334	+	FALSE	hs|1p36.33	NA	NA	NA	NA	NA	NA	NA	NA	NA
LAMC2	4.45e-06	18.9203	7.15312	7.09388	6.79894	7.67119	6.93983	6.63723	1.4801	1.73709	0.545772	1.92592	2.39659	2.63711	4.88351	2.36391	Homo sapiens laminin, gamma 2 (LAMC2), transcript variant 2, mRNA [NM_018891]	GAGTTTGACACGAATATGGATGCAGTACAGATGGTGATTACAGAAGCCCAGAAGGTTGAT	chr1	183209301	183209453	+	FALSE	hs|1q25.3	ENST00000493293	3918	NM_018891	laminin, gamma 2	GO:0048471|GO:0034329|GO:0005576|GO:0005607|GO:0005615|GO:0005610|GO:0008544|GO:0016020|GO:0022617|GO:0030198|GO:0031581|GO:0007155|GO:0005938|GO:0008201	NM_018891	THC2541327
Homo sapiens cDNA FLJ37284 fis, clone BRAMY2013590. [AK094603]	0.00261047	4.15544	10.316	10.0376	10.0165	10.2916	9.81029	10.1325	4.98118	10.2329	8.3628	4.41083	5.03728	7.74905	7.90364	5.8112	GGACAGTGATTGATCTTTTCACAATGTATGTAGCCTCTAGAATTTTGTACATATGTTTGC	chr4	186507249	186507310	-	FALSE	hs|4q35.1	NA	NA	AK094603	NA	NA	NA	THC2478339	NA
DNM1 pseudogene 30 [Source:HGNC Symbol;Acc:HGNC:35177] [ENST00000563586]	0.000618282	0.403976	4.80421	4.1931	4.62353	4.34663	5.10956	5.12383	6.23329	6.39797	6.50884	6.09722	4.96927	5.03317	6.45714	5.88524	GTTTCATGCCCAAGACCGTCATGCACGTCATGATCAACAACACCAAGGAGCTCATATTAT	chr15	30444712	30445506	-	FALSE	hs|15q13.2	ENST00000563586	NA	NA	NA	NA	NA	NA	NA
LOC730183	8.55e-08	2.68692	10.8471	10.7528	10.902	10.8849	10.5577	10.7827	9.06414	9.49089	9.74896	9.21452	9.26584	9.70899	9.20267	9.04782	Homo sapiens uncharacterized LOC730183 (LOC730183), mRNA [NM_001256932]	AGCTTTCAAACACCTTTGCCATCTCTTCGCAAACTTTCTAGATTAAGAATCCCTTTGAGA	chr16	30709084	30709143	-	FALSE	hs|16p11.2	NA	730183	NM_001256932	uncharacterized LOC730183	NA	NM_001256932	THC2539230
CETP	0.00015722	4.27112	8.34747	8.02357	8.57012	8.26417	6.77399	8.23392	5.79111	4.47547	4.82004	6.08898	5.72766	7.66325	5.37747	5.76761	Homo sapiens cholesteryl ester transfer protein, plasma (CETP), transcript variant 1, mRNA [NM_000078]	AGCTCTTCTTAAGCCTCTTGGATTTCCAGATTACACCAAAGACTGTTTCCAACTTGACTG	chr16	57015110	57015590	+	FALSE	hs|16q13	ENST00000379780	1071	NM_000078	cholesteryl ester transfer protein, plasma	GO:0017127|GO:0070328|GO:0044281|GO:0030301|GO:0005615|GO:0010874|GO:0008289|GO:0015914|GO:0015485|GO:0034364|GO:0034197|GO:0070062|GO:0008203|GO:0042632|GO:0010745|GO:0043691|GO:0055088|GO:0031210|GO:0005576|GO:0005548|GO:0055085|GO:0031982|GO:0006898|GO:0034372|GO:0034374|GO:0006869|GO:0034375|GO:0042157|GO:0055091|GO:0006641|GO:0046470|GO:0005319|GO:0017129	NM_000078	THC2472959
PAQR9	2.97e-06	17.1382	7.77533	7.13834	6.43221	6.8752	6.96888	5.16517	1.39275	3.80248	2.59613	1.64901	1.66175	3.31952	2.21761	3.68184	Homo sapiens progestin and adipoQ receptor family member IX (PAQR9), mRNA [NM_198504]	AGGGACTCTGGTTAAACTATTGGTGAGGAGCTCGAGTGGTTTGTATAGACCCCAGATTTT	chr3	142680206	142680265	-	FALSE	hs|3q23	ENST00000340634	344838	NM_198504	progestin and adipoQ receptor family member IX	GO:0004872|GO:0016021	NM_198504	THC2613466
LOC100506700	0.000962772	0.130708	3.53515	5.03075	5.17881	5.51195	4.58327	4.41287	9.71645	5.64921	6.55138	7.55774	7.9168	7.60281	6.12814	6.10555	Homo sapiens uncharacterized LOC100506700 (LOC100506700), long non-coding RNA [NR_109999]	GATGTTGAAACAGACCCTGAGGTTAATGCATTCTTTCCAACATTAGGTCCTAAAACTTCT	chr14	81908409	81908468	-	FALSE	hs|14q31.1	ENST00000555001	100506700	NR_109999	uncharacterized LOC100506700	NA	NR_109999	THC2728054
C6orf10	5.27e-05	6.38107	4.23727	3.7006	3.76843	3.25102	2.78907	2.57395	1.26407	0.567812	0.558592	0.532524	0.930136	0.595775	1.12327	0.835302	Homo sapiens chromosome 6 open reading frame 10 (C6orf10), transcript variant 1, mRNA [NM_006781]	GAATCCCAAGTAAAGAACACTGAGGTGAGTGTACCAGAAACACTGGAATCCCAAGTAAAG	chr6	32261028	32261087	-	FALSE	hs|6p21.32	ENST00000620562	10665	NM_006781	chromosome 6 open reading frame 10	GO:0005634|GO:0016021	NM_006781	THC2483865
TCCACCCTCCCTAGAAGCTGTGCCACCAACGAAAGCTTTTCCCTGCACCTGTAGTAGAGG	0.00228904	0.42275	7.7972	7.59709	8.03534	8.036	8.11688	8.11333	9.53916	9.68328	9.53774	9.22513	7.76159	9.39005	9.29662	8.18821	NA	NA	NA	NA	FALSE	NA	NA	NA	NA	NA	NA	NA	NA	NA	NA
GCAAAGCCTCTAATTTTAAAGAAGAAAAGGAATCCGAAAGAGGGATGGCTATAGCAACCT	0.000392394	2.52095	6.70638	6.71187	6.76929	7.33267	6.67968	6.67613	6.05577	5.79164	5.70987	5.07614	5.82451	3.99422	5.73212	4.81676	chr3	174626652	174626711	+	FALSE	hs|3q26.31	NA	NA	NA	NA	NA	NA	THC2764893	NA	NA
PNPLA5	1.11e-05	0.310404	5.44702	5.01989	5.16549	5.58573	5.15167	5.33127	7.3208	7.38	6.91215	6.72393	5.7798	7.24579	6.9367	7.03361	Homo sapiens patatin-like phospholipase domain containing 5 (PNPLA5), transcript variant 1, mRNA [NM_138814]	TTCAACTTCAGCTTCCAAATCTCCACTGAGAACTTCTTCCTGGGGCTCATATGTCTCATA	chr22	44285224	44285283	-	FALSE	hs|22q13.31	ENST00000381198	150379	NM_138814	patatin-like phospholipase domain containing 5	GO:0016042|GO:0016787	NM_138814	THC2490574
GTATTCAATGGCTATCTTCACAGGTGTGATCATACCACATTCACTTCTGAAACATTTTTG	0.0215671	2.22636	6.65588	5.0534	6.41557	5.20902	6.94472	5.7026	4.32967	3.41831	3.04038	3.38639	4.35059	6.37293	5.82923	5.6117	NA	NA	NA	NA	FALSE	NA	NA	NA	NA	NA	NA	NA	NA	NA	NA
GGTGCTCACGCTCACACCCGCACCCATCGCAAAAACGCAGCTGTGCAGGCCGAGGGCGGC	0.0360112	0.474533	10.4863	9.95603	10.5601	10.7072	10.5375	10.3844	11.7041	11.8851	11.3821	11.5359	9.53413	12.4655	11.6814	10.2919	chr17	46710805	46710864	+	FALSE	hs|17q21.32	NA	NA	NA	NA	NA	NA	NA	NA	NA
CACNB1	1.41e-06	0.408437	4.77228	4.81534	4.89987	4.5597	4.91623	4.88512	6.25371	5.71063	5.57647	6.45674	6.19069	6.06073	5.9465	6.40792	Homo sapiens calcium channel, voltage-dependent, beta 1 subunit (CACNB1), transcript variant 3, mRNA [NM_199248]	TACTTCAAAGGCTCATCAAGTCCCGAGGAAAGTCTCAGTCCAAACACCTCAATGTCCAAA	chr17	37334272	37334331	-	FALSE	hs|17q12	ENST00000582544	782	NM_199248	calcium channel, voltage-dependent, beta 1 subunit	GO:0016529|GO:0005245|GO:0007528|GO:0007411|GO:0006612|GO:0070588|GO:0006810|GO:0030315|GO:0008331|GO:0007268|GO:0005891	NM_199248	NP108655
Homo sapiens cDNA clone IMAGE:4120690, **** WARNING: chimeric clone ****. [BC011660]	1.33e-06	0.390964	5.36535	5.12726	5.16023	5.18411	4.65483	5.15726	6.60166	6.70255	6.36922	6.71861	5.84251	6.82485	6.3197	6.19866	TTGGCAATGGAGATGGTCTGCTGCTCCATGACCTCGTGGATGGCTGTGCGGTCGGCCTCA	chr4	152020350	152020409	+	FALSE	hs|4q31.3	NA	NA	BC011660	NA	NA	NA	NA	NA
ROR1	0.00196781	3.10762	6.85226	6.53227	6.45777	6.87246	7.19548	6.33269	5.72184	4.69743	2.87483	5.358	5.3803	3.87926	6.33815	3.37811	Homo sapiens receptor tyrosine kinase-like orphan receptor 1 (ROR1), transcript variant 1, mRNA [NM_005012]	TTCAGATCTTTTTCTCCTTTTTTGCACAAAACTATGCTTATGGTTTGTGTCACAGAAGTG	chr1	64646792	64646851	+	FALSE	hs|1p31.3	ENST00000371079	4919	NM_005012	receptor tyrosine kinase-like orphan receptor 1	GO:0043235|GO:0005515|GO:0017147|GO:0005737|GO:0005886|GO:0005887|GO:0018108|GO:0004714|GO:0007169|GO:0005524	NM_005012	THC2602387
AGGAGGCAGCCTGTTAGGGAATTTCTTCTTCTGGAGCTCTCGATCTTAAAACGGACTTTT	0.00995756	2.16304	9.52611	8.20619	8.75302	7.98795	7.437	8.21242	5.54805	9.84551	4.07684	4.45646	5.53057	7.6376	5.92175	5.20989	chr8	106477089	106477148	+	FALSE	hs|8q23.1	NA	NA	NA	NA	NA	NA	THC2781239	NA	NA
TGAAAATGAGCACCAGTTATCTTTAAGAATGGTCAGAACGGTCAGTTTAGGGGCTGGTGC	0.00052948	0.449563	10.8846	10.6442	10.5867	11.0078	10.6537	11.039	11.9119	12.7913	12.2493	11.7395	11.0573	11.3269	11.7858	12.161	NA	NA	NA	NA	FALSE	NA	NA	NA	NA	NA	NA	NA	NA	NA	NA
Homo sapiens cDNA FLJ20034 fis, clone COL00195. [AK000041]	0.0250136	0.492548	6.72957	6.22181	6.62422	6.44259	6.35981	6.58577	6.62633	7.2179	6.69895	7.11894	7.17291	9.12368	7.13695	7.13673	TCTGTCTGTTACTCCTGACCCACTTTGTTTCATGAATGAGCCTTTCCTGTTGATGGAGGA	chr14	95927094	95927153	-	FALSE	hs|14q32.13	NA	NA	AK000041	NA	NA	NA	NA	NA
LAMA3	0.00872418	2.70204	5.5597	3.32357	4.32514	4.00216	4.99487	3.5889	5.17937	1.93593	0.494728	2.87136	2.30807	0.763882	1.37852	3.26987	Homo sapiens laminin, alpha 3 (LAMA3), transcript variant 1, mRNA [NM_198129]	TTTAAATCTCCACAGACGTATATGGATGGTTTACTGCATTATGTATCTGTAATAAGCGAC	chr18	21511098	21511157	+	FALSE	hs|18q11.2	ENST00000399516	3909	NM_198129	laminin, alpha 3	GO:0030334|GO:0034329|GO:0005102|GO:0005606|GO:0005576|GO:0035987|GO:0030155|GO:0005604|GO:0045995|GO:0005610|GO:0008544|GO:0022617|GO:0005198|GO:0030198|GO:0031581|GO:0007155|GO:0070062	NM_198129	NP1167265
CTGGAGATCTGAGGTTATGTTACAGTATTGTGGAGTTTTGTTGCTTAAAATTCTCCTCCT	0.0120623	2.25253	4.5989	5.93083	6.13352	6.75456	6.10091	6.12209	4.38646	5.62952	3.74938	5.7429	4.77384	5.04098	3.25142	4.93342	chr1	220083970	220084029	-	FALSE	hs|1q41	NA	NA	NA	NA	NA	NA	NA	NA	NA
KCNG1	4.16e-07	6.14924	8.2747	8.35415	8.49531	8.41013	8.91952	8.63779	5.64225	5.68296	5.65066	5.53141	5.31574	6.39821	6.94222	5.19043	Homo sapiens potassium channel, voltage gated modifier subfamily G, member 1 (KCNG1), mRNA [NM_002237]	CCCTATGTGTGTTTCCCTCAATAAGGAGATGCCTTGTTCTTTTCACCATGCAAATAACAT	chr20	49620263	49620322	-	FALSE	hs|20q13.13	ENST00000506387	3755	NM_002237	potassium channel, voltage gated modifier subfamily G, member 1	GO:0005251|GO:0005886|GO:0008076|GO:0007268|GO:0005267|GO:0051260|GO:0034765|GO:0016021|GO:0006813|GO:0071805|GO:0043231	NM_002237	THC2507184
ARID5A	0.000191365	0.214185	9.8137	9.10538	9.07938	8.93176	9.73836	9.01305	11.9741	11.6202	9.46442	12.2092	11.8421	10.5685	11.2598	11.8602	Homo sapiens AT rich interactive domain 5A (MRF1-like) (ARID5A), mRNA [NM_212481]	ACAAGTGAAGAAGAAGGCAGTGGGAAAACTGGGTTTATCTCAAGGCAGCAGCCTGAGCCC	chr2	97218184	97218243	+	FALSE	hs|2q11.2	ENST00000412735	10865	NM_212481	AT rich interactive domain 5A (MRF1-like)	GO:0005515|GO:0005667|GO:0006357|GO:0044212|GO:0005730|GO:0005634|GO:0003677|GO:0035066|GO:0006351|GO:0002062|GO:0045944|GO:0003682|GO:0005654|GO:0045892|GO:0008134	NM_212481	THC2609061
URB2	0.00101654	2.14375	9.87239	9.66395	9.05615	9.27458	8.97687	8.62816	7.67119	8.03638	8.74856	7.98921	8.43363	8.03453	8.30511	8.17226	Homo sapiens URB2 ribosome biogenesis 2 homolog (S. cerevisiae) (URB2), mRNA [NM_014777]	GACCCTGGGATGAGATTAATTCAATAGAAAAATTGCTGACTCTTGGGACCTTTCTGTGTT	chr1	229795276	229795335	+	FALSE	hs|1q42.13	ENST00000258243	9816	NM_014777	URB2 ribosome biogenesis 2 homolog (S. cerevisiae)	GO:0016235|GO:0005730|GO:0005634	NM_014777	THC2600987
PFN1P2	0.0181428	0.434575	11.4227	11.3821	11.4259	11.507	11.8933	11.5843	13.2439	12.5224	12.997	12.6643	10.9666	13.7336	12.6518	11.4337	Homo sapiens profilin 1 pseudogene 2 (PFN1P2), non-coding RNA [NR_003242]	CCCTCCTGTGTGTGGCTGGAAAACTTTTTTGTTTTGATGGATTTTTTATGAATAAAAAAG	chr1	146060515	146060574	+	FALSE	hs|1q21.1	ENST00000604437	767846	NR_003242	profilin 1 pseudogene 2	NA	NR_003242	THC2476417
APOL6	0.013062	0.494504	5.89621	5.41135	5.33427	4.63525	6.45491	5.11174	7.01431	7.15756	6.27976	6.74659	7.0688	5.39275	5.72924	6.5614	Homo sapiens apolipoprotein L, 6 (APOL6), mRNA [NM_030641]	TATGTACAGTTTACATGAATGTTCCTCAGGACATGGCATACAATGGCCTTGGAGGTCCAA	chr22	36055626	36055685	+	FALSE	hs|22q12.3	ENST00000409652	80830	NM_030641	apolipoprotein L, 6	GO:0005737|GO:0006869|GO:0042157|GO:0005576|GO:0008289	NM_030641	THC2475727
GTTTTTCTCCTCGCCATCGTCATAGACCGTGTACTCATCCTCCGGCATAGTGAACACATC	0.00268681	0.449978	3.75498	3.84254	3.69905	4.76887	4.68254	4.73138	5.73817	5.87612	5.85887	5.41438	4.40659	5.77436	5.47082	4.55428	chr17	26696802	26696861	+	FALSE	hs|17q11.2	NA	NA	NA	NA	NA	NA	NA	NA	NA
TGCTTTTGGTGTTTTAGACGTGAAGCCTTTGCCCATACCTATGCACTGAATGGTAATGCC	0.00737598	0.336907	7.14694	7.08062	7.15949	7.30748	7.3409	7.17223	8.9811	9.38692	9.06306	8.8019	6.6904	9.26102	8.92015	7.17378	chr18	27281688	27281747	-	FALSE	hs|18q12.1	NA	NA	NA	NA	NA	NA	NA	NA	NA
AGAGACCCCAACCTGACTCAGCACTATCTGTATCTGAACTGAATTACAGAATTACTGAAT	0.000526233	0.479586	4.51265	4.26521	4.20219	4.25806	4.02593	4.44746	5.97968	5.514	5.24357	5.42688	4.52694	5.53931	5.47302	4.55832	chr17	43269518	43269577	-	FALSE	hs|17q21.31	NA	NA	NA	NA	NA	NA	NA	NA	NA
PTBP3	0.000737971	3.14926	11.2211	11.1809	11.2817	11.7617	11.3594	11.3238	7.76917	9.91039	10.4438	8.21258	10.0511	9.8069	9.83208	9.93279	Homo sapiens polypyrimidine tract binding protein 3 (PTBP3), transcript variant 1, mRNA [NM_005156]	TACGTGGTCTGTTCATCAAAATTCCCCTTTTCAGTTTTTAAGAATGTTCGTCTAACAGAA	chr9	114981141	114981200	-	FALSE	hs|9q32	ENST00000458258	9991	NM_005156	polypyrimidine tract binding protein 3	GO:0008380|GO:0006397|GO:0048025|GO:0043249|GO:0000166|GO:0033119|GO:0003723|GO:0045595|GO:0005634|GO:0009653	NM_005156	THC2495816
CARD11	0.000566553	0.451701	5.31489	5.01475	4.75951	5.28858	4.67524	4.79728	6.17306	5.92858	5.47825	5.77239	6.53875	5.82417	5.55466	7.09606	Homo sapiens caspase recruitment domain family, member 11 (CARD11), mRNA [NM_032415]	CTGGAGGCTGGGATCGGCTGCACAAGAGACTTGATCAAGTCCAACATCTACCCCATCGTG	chr7	2949725	2949784	-	FALSE	hs|7p22.2	ENST00000396946	84433	NM_032415	caspase recruitment domain family, member 11	GO:0005515|GO:0045577|GO:0050852|GO:0005886|GO:0030890|GO:0031295|GO:0001819|GO:0005829|GO:0005737|GO:0051092|GO:0042101|GO:0042102|GO:0045580|GO:0043123|GO:0070062|GO:0001772|GO:0050700|GO:0004385|GO:0042981|GO:0045086|GO:0045061|GO:0045087|GO:0046939|GO:0045121|GO:0038095	NM_032415	THC2470558
CNTNAP2	0.000162576	7.74943	11.4852	11.7192	12.1162	10.9242	11.8465	11.1987	9.53413	8.78059	9.07324	7.37893	6.70255	7.73977	9.89302	5.76894	Homo sapiens contactin associated protein-like 2 (CNTNAP2), mRNA [NM_014141]	CTTGAGCACATCCTTAAAATATCAGCACAAGTTGGGGGAGGCAGGCAATGGAATATAATG	chr7	148112791	148112850	+	FALSE	hs|7q36.1	ENST00000602734	26047	NM_014141	contactin associated protein-like 2	GO:0030424|GO:0008038|GO:0021987|GO:0019226|GO:0030425|GO:0031175|GO:0021794|GO:0008076|GO:0043025|GO:0043204|GO:0030534|GO:0007612|GO:0030673|GO:0007155|GO:0071109|GO:0005794|GO:0009986|GO:0044224|GO:0071625|GO:0021756|GO:0016020|GO:0045163|GO:0007420|GO:0021761|GO:0035176|GO:0071205|GO:0016021|GO:0034613|GO:0019899|GO:0005769	NM_014141	THC2604674
RNF157-AS1	9.42e-05	9.50197	9.52628	8.99943	9.4779	9.28529	9.52806	9.15773	4.3571	4.81676	3.50863	5.06553	4.96894	6.12308	7.78907	7.03236	Homo sapiens RNF157 antisense RNA 1 (RNF157-AS1), long non-coding RNA [NR_040017]	TACAGGGATTAGATCCGAGCCACATTACCCATATATGCTCAGAATGGTCTGTCAGGAACA	chr17	74150602	74150661	+	FALSE	hs|17q25.1	NA	100507218	NR_040017	RNF157 antisense RNA 1	NA	NR_040017	THC2682291
TTGATTAGGAATGAACTCTAGATGCACAAAATGATTGGACCGTGAACAGTAATACAACTA	0.00174163	2.00873	4.16928	3.57378	4.46999	4.69096	4.69564	4.77849	3.32575	3.13636	3.45803	3.80982	3.73025	3.30745	3.82176	2.5788	chr11	31810600	31810659	+	FALSE	hs|11p13	NA	NA	NA	NA	NA	NA	NA	NA	NA
CGREF1	0.000193188	0.211957	9.21093	9.71645	9.09732	8.74832	8.91972	7.79402	10.6728	10.0167	11.3436	10.9683	12.4398	10.1505	10.6205	11.9929	Homo sapiens cell growth regulator with EF-hand domain 1 (CGREF1), transcript variant 1, mRNA [NM_006569]	GTATCAGGTCTTTCTATGCAGCTCAGGGAGACCCTAAGTTAAGGGGCAGATTACCAATAA	chr2	27323963	27324022	-	FALSE	hs|2p23.3	ENST00000260595	10669	NM_006569	cell growth regulator with EF-hand domain 1	GO:0030308|GO:0008285|GO:0005509|GO:0006950|GO:0007050|GO:0005576|GO:0007155	NM_006569	THC2473925
lnc-ADAM30-1	0.000168938	2.11623	5.48848	5.28577	5.3192	4.52925	5.28664	4.89284	4.30462	3.9789	4.50315	3.46951	4.4449	3.53643	3.97524	4.12808	Homo sapiens cDNA FLJ11946 fis, clone HEMBB1000709. [AK022008]	TCCATTTGACCTTTTAAGGATGTGAATTGGCTTTAAGCAGTAGACTCCCTTTAGTACGGC	chr1	120533662	120533721	-	FALSE	hs|1p12	NA	NA	AK022008	lnc-ADAM30-1:1	NA	NA	THC2493175
AAGATTCCAGTGTGATAAATCTGTTCATTCCCTTTCTTTCCCAGAAACTGAAACTGCAAA	2.11e-08	0.22418	4.43855	4.15644	3.94854	4.47984	3.82294	4.05668	6.40922	6.80836	6.10169	6.60414	6.18749	5.68573	6.05115	6.47605	chr1	112317614	112317673	+	FALSE	hs|1p13.2	NA	NA	NA	NA	NA	NA	NA	NA	NA
Homo sapiens cDNA clone IMAGE:5751895. [BC035751]	0.00113609	0.291569	11.8566	11.5736	12.0525	11.376	11.7122	11.5973	13.7305	13.5395	13.4513	13.8985	11.471	13.7982	14.0868	12.434	GCAGCCTTCCCCCTCCAGACACGGAAGCATGTCACACCACTGCTTGGTCTTGATGATTCT	chr22	49103531	49103590	-	FALSE	hs|22q13.32	NA	NA	BC035751	NA	NA	NA	NA	NA
UI-H-DF0-bey-h-15-0-UI.s1 NCI_CGAP_DF0 Homo sapiens cDNA clone UI-H-DF0-bey-h-15-0-UI 3', mRNA sequence [BU616488]	0.0290918	0.468962	7.90927	8.57742	6.20322	8.47503	6.77338	8.47178	9.34358	9.16612	8.96501	9.27991	9.04252	7.46527	9.27074	9.33069	TGGGTGGTTCCTTAGTTTAGTTCAACTGGAATAAAATTATAAAAGTTCTATCTTGGCCAG	chr7	108203646	108203705	+	FALSE	hs|7q31.1	NA	NA	BU616488	NA	NA	NA	NA	NA
TAGTCTCTGTGCCCTTGATCGTCAGATTCGAAAAGTGGGATTTTTTAAAACCTCCAGCTG	0.00283054	0.449263	7.68247	8.20278	8.34575	8.74744	8.51635	8.41877	9.73315	8.83232	9.63488	9.12273	8.66543	10.6674	8.84649	9.39963	chr10	27638652	27638715	-	FALSE	hs|10p12.1	NA	NA	NA	NA	NA	NA	NA	NA	NA
DPYSL3	0.000384608	3.90507	6.39243	6.36204	6.46738	7.34339	7.03478	5.55691	2.83738	3.5674	5.36383	5.92526	4.13095	4.42208	4.94472	3.65164	Homo sapiens dihydropyrimidinase-like 3 (DPYSL3), transcript variant 2, mRNA [NM_001387]	CGGTTGTGATCTAAAGAATCAATAAGCCTCAAGCCTTATGTTTCTCCAATGTTACGCTCG	chr5	146773444	146773503	-	FALSE	hs|5q32	ENST00000398514	1809	NM_001387	dihydropyrimidinase-like 3	GO:0051219|GO:0017124|GO:0030336|GO:0016812|GO:0051491|GO:0048678|GO:0005615|GO:0044297|GO:0030027|GO:0005829|GO:0030426|GO:0035374|GO:0031941|GO:0071345|GO:0007411|GO:0010976|GO:0010977|GO:0051260|GO:0051764|GO:0051017|GO:0070382|GO:0006208	NM_001387	THC2537809
TTGCTAAGTTGCTCTTATTGTGTAGAACTTTCCCATTTTAATGGTGACTCATACTACCAT	1.79e-05	20.246	6.66016	6.56813	6.78633	8.08929	8.29898	7.28265	0.740333	0.760978	2.64877	0.770683	2.49497	5.06607	4.08363	0.74454	chr4	121950579	121950638	-	FALSE	hs|4q27	NA	NA	NA	NA	NA	NA	THC2614991	NA	NA
WNT7A	3.73e-06	0.179907	2.94011	3.23073	2.55384	2.13134	2.70246	2.81002	5.98616	4.53431	4.9087	5.90251	5.78137	4.78069	4.51968	4.37945	Homo sapiens wingless-type MMTV integration site family, member 7A (WNT7A), mRNA [NM_004625]	AGAACATGAAGCTGGAATGTAAGTGCCACGGCGTGTCAGGCTCGTGCACCACCAAGACGT	chr3	13860851	13860910	-	FALSE	hs|3p25.1	ENST00000285018	7476	NM_004625	wingless-type MMTV integration site family, member 7A	GO:0070307|GO:0090263|GO:0046330|GO:0071560|GO:0030010|GO:0005615|GO:0005109|GO:0000578|GO:0002062|GO:0007548|GO:0014834|GO:0032355|GO:0048018|GO:0051965|GO:0009986|GO:0014719|GO:0005796|GO:0031133|GO:0005125|GO:0010595|GO:0045165|GO:0050808|GO:0001502|GO:0005788|GO:0045893|GO:0042733|GO:0035567|GO:0021846|GO:0048103|GO:0005886|GO:0060066|GO:0009953|GO:0048864|GO:0007269|GO:0021707|GO:0008105|GO:…	NM_004625	THC2476214
DUSP2	0.00247617	7.66737	10.4887	11.1953	9.67654	10.7127	11.1404	7.90406	7.58517	7.83726	7.67214	7.36291	6.63905	7.69924	8.11574	7.24602	Homo sapiens dual specificity phosphatase 2 (DUSP2), mRNA [NM_004418]	AGAAATCAGCTAGACGCTATACCGTGGACTCTCCCTGGTCCACCACCATGTTGAAGCCCT	chr2	96809235	96809294	-	FALSE	hs|2q11.2	ENST00000288943	1844	NM_004418	dual specificity phosphatase 2	GO:0005515|GO:0000188|GO:0001706|GO:0006470|GO:0008330|GO:0005634|GO:0008138|GO:0035335|GO:0017017|GO:0004725|GO:0051019	NM_004418	THC2463209
TRIM7	2.44e-06	0.350528	6.57598	6.66325	6.86445	6.58468	6.08563	6.57549	8.30855	8.31995	8.12706	8.27199	7.27405	8.44837	7.94957	7.65288	Homo sapiens tripartite motif containing 7 (TRIM7), transcript variant 6, mRNA [NM_033342]	CTGCATAGGGCGCTGCTGGGAGCGCCCGGGCGCGGGGTCTGTTGGGGCCGCCACCCGCGC	chr5	180631899	180631958	-	FALSE	hs|5q35.3	ENST00000334421	81786	NM_033342	tripartite motif containing 7	GO:0005737|GO:0008270|GO:0005634	NM_033342	THC2475009
C1orf106	0.000374234	2.1038	3.8122	4.34466	3.32575	3.97774	4.13127	3.58061	2.73527	2.5581	2.62108	1.97982	3.34024	2.70182	3.48936	2.65506	Homo sapiens chromosome 1 open reading frame 106 (C1orf106), transcript variant 1, mRNA [NM_018265]	TTCCAAGAACTCTGGTGTCTGACCTAGAAGAGGCACAGTTCTCTCTACTGGAAAGAAAAC	chr1	200884343	200884402	+	FALSE	hs|1q32.1	ENST00000465162	55765	NM_018265	chromosome 1 open reading frame 106	NA	NM_018265	THC2491909
TUBB3	1.08e-05	2.15498	12.6568	12.5595	12.8176	12.1834	12.6246	12.9407	11.3604	11.3309	11.5122	11.406	11.8759	11.3993	11.5874	11.7609	Homo sapiens tubulin, beta 3 class III (TUBB3), transcript variant 1, mRNA [NM_006086]	GCGGCCTCAAGATGTCCTCCACCTTCATCGGGAACAGCACGGCCATCCAGGAGCTGTTCA	chr16	90001935	90001994	+	FALSE	hs|16q24.3	ENST00000315491	10381	NM_006086	tubulin, beta 3 class III	GO:0005515|GO:0042277|GO:0030424|GO:0051258|GO:0005874|GO:0003924|GO:0005634|GO:0005525|GO:0055085|GO:0030425|GO:0071944|GO:0006184|GO:0005737|GO:0007067|GO:0006457|GO:0007411|GO:0043025|GO:0005200|GO:0051084|GO:0007017|GO:0044267|GO:0070062	NM_006086	THC2497321
LCA5L	0.00291711	2.16693	7.11128	7.32966	8.05139	7.14534	6.93365	8.26038	6.33101	6.27811	6.17852	5.98763	7.37018	5.64031	6.53028	6.59312	Homo sapiens Leber congenital amaurosis 5-like (LCA5L), mRNA [NM_152505]	AAGAAAAGCAGTCTCATGGAAGAACTCTTTGGATCAGGCTATGTCTTGAAAACTGACCAA	chr21	40777982	40778041	-	FALSE	hs|21q22.2	ENST00000495240	150082	NM_152505	Leber congenital amaurosis 5-like	NA	NM_152505	THC2472746
GJC1	0.000995482	0.117082	3.69259	3.40315	4.23922	4.01611	3.90657	3.081	5.67482	4.6171	5.04302	5.73938	6.38849	9.03731	6.38472	6.31145	Homo sapiens gap junction protein, gamma 1, 45kDa (GJC1), transcript variant 1, mRNA [NM_005497]	ACGGAGGAGGACAACGAAGAGGATCCTATGATGTATCCAGAGATGGAGTTAGAAAGTGAT	chr17	42882739	42882798	-	FALSE	hs|17q21.31	ENST00000592524	10052	NM_005497	gap junction protein, gamma 1, 45kDa	GO:0005243|GO:0005886|GO:0007268|GO:0016264|GO:0048738|GO:0034220|GO:0006936|GO:0014704|GO:0005789|GO:0006810|GO:0007043|GO:0086014|GO:0061024|GO:0005921|GO:0005922|GO:0048468|GO:0016021|GO:0001570|GO:0005216|GO:0007601	NM_005497	THC2493944
CSAG1	0.00841729	0.136082	5.32875	5.03448	5.10379	5.0884	6.77961	4.97394	6.534	6.48463	6.01141	6.35601	10.4925	8.30957	6.59132	9.19613	Homo sapiens chondrosarcoma associated gene 1 (CSAG1), transcript variant a, mRNA [NM_153478]	ACTATCCAGCCACTCTGACCAGCCGAACCAGGAACTCAATCAAAATGCGCCACAGCAGGA	chrX	151909253	151909312	+	FALSE	hs|Xq28	ENST00000452779	158511	NM_153478	chondrosarcoma associated gene 1	NA	NM_153478	NP1166054
GATA2	0.00291549	2.11558	4.70341	4.3967	4.44196	4.86447	4.76461	5.21446	2.84509	5.17794	2.34278	3.26411	3.01212	3.93505	3.10734	3.6133	Homo sapiens GATA binding protein 2 (GATA2), transcript variant 2, mRNA [NM_032638]	AATGTTAACAGGCCACTGACCATGAAGAAGGAAGGGATCCAGACTCGGAACCGGAAGATG	chr3	128200105	128200664	-	FALSE	hs|3q21.3	ENST00000487848	2624	NM_032638	GATA binding protein 2	GO:0006909|GO:0005515|GO:0021514|GO:0021533|GO:0003700|GO:0045599|GO:0001655|GO:0021983|GO:0070345|GO:0035065|GO:0060872|GO:0050766|GO:0045654|GO:0048873|GO:0045944|GO:0048469|GO:0021902|GO:0035019|GO:0097154|GO:0045746|GO:2000178|GO:0042472|GO:0001709|GO:0021954|GO:0001892|GO:0060216|GO:0000122|GO:0045650|GO:0045766|GO:0006351|GO:0043234|GO:0001077|GO:0045648|GO:0007596|GO:0035854|GO:0003682|GO:…	NM_032638	NP099465
FOXD2	0.00493899	2.91663	8.708	8.5949	7.62611	7.77991	7.98333	6.30372	5.84498	5.44454	5.44509	5.5001	6.00073	8.03551	7.15511	5.69275	Homo sapiens forkhead box D2 (FOXD2), mRNA [NM_004474]	TGGGGAAGCTCTGTGAAATCGTCTGATGGTCTGTGTGGAAGAAAAGAAAAATCTGTCTGC	chr1	47906257	47906316	+	FALSE	hs|1p33	ENST00000334793	2306	NM_004474	forkhead box D2	GO:0043565|GO:0003700|GO:0006366|GO:0006357|GO:0000981|GO:0005634	NM_004474	THC2480256
PPP4R4	0.00510218	2.54929	8.26417	8.28159	6.98299	8.34147	7.30659	7.31503	1.90222	4.14198	9.17732	4.20542	4.26127	5.45152	5.30844	2.02749	Homo sapiens protein phosphatase 4, regulatory subunit 4 (PPP4R4), transcript variant 1, mRNA [NM_058237]	GCCTGTGGAATATATACAGTTCTTAATTTTAAACTGTCAGTTCTTGAGATATACCGTGTG	chr14	94745813	94745872	+	FALSE	hs|14q32.13	ENST00000304338	57718	NM_058237	protein phosphatase 4, regulatory subunit 4	GO:0005515|GO:0008287|GO:0005737|GO:0019888|GO:0080163|GO:0032515	NM_058237	THC2476366
UBR4	9.82e-05	0.36271	4.13696	4.04472	4.3385	3.69858	4.1062	4.41317	4.74029	5.34225	5.93192	5.16258	6.24747	5.1528	5.21424	6.25232	ubiquitin protein ligase E3 component n-recognin 4 [Source:HGNC Symbol;Acc:HGNC:30313] [ENST00000419533]	TTTTGGTCCATGGAACTTTTACCACATGTATTCAGCATATATACACGATTAAAGTGCTGC	chr1	19477429	19477488	-	FALSE	hs|1p36.13	ENST00000419533	23352	AB037728	ubiquitin protein ligase E3 component n-recognin 4	GO:0005515|GO:0005516|GO:0005813|GO:0005737|GO:0004842|GO:0042787|GO:0016020|GO:0016874|GO:0016032|GO:0008270|GO:0005654|GO:0016021	NA	THC2491271
POLQ	0.00537611	0.445201	4.68009	4.21131	3.19981	3.22108	4.2951	3.20853	5.37546	5.2639	4.12314	4.54649	4.69626	5.95031	5.01923	5.05583	Homo sapiens clone HQ0327 PRO0327 mRNA, complete cds. [AF090919]	TCACCATTCGAGTTGTATGCCCTTCAAGAGTTAGTTGTGTTCCCAAACTTGTTCATGTCA	chr3	121226983	121227042	-	FALSE	hs|3q13.33	NA	10721	AF090919	polymerase (DNA directed), theta	GO:0043142|GO:0003684|GO:0006261|GO:0006281|GO:0071897|GO:0003887|GO:0005654|GO:0005524	NA	THC2485968
MYL2	0.000387592	0.420353	4.32574	3.74938	4.30083	4.13843	4.05023	4.23753	5.21347	5.23533	5.03664	5.00439	4.62322	6.40902	5.79857	5.0023	Homo sapiens myosin, light chain 2, regulatory, cardiac, slow (MYL2), mRNA [NM_000432]	AAGGAGGCTCCGGGTCCAATTAACTTTACTGTGTTCCTCACAATGTTTGGGGAGAAACTT	chr12	111351994	111352053	-	FALSE	hs|12q24.11	ENST00000549029	4633	NM_000432	myosin, light chain 2, regulatory, cardiac, slow	GO:0005515|GO:0060047|GO:0030308|GO:0030049|GO:0055010|GO:0005509|GO:0006942|GO:0016459|GO:0009791|GO:0015629|GO:0030016|GO:0060048|GO:0030017|GO:0042694|GO:0005829|GO:0048747|GO:0003785|GO:0055003|GO:0005856|GO:0008307|GO:0031672|GO:0032036	NM_000432	THC2578079
GPR126	0.00844884	0.433982	6.44402	6.43863	6.77338	6.21465	6.43668	6.20798	7.43287	7.39771	7.36521	7.2381	6.15726	8.73201	8.33196	6.85095	Homo sapiens G protein-coupled receptor 126 (GPR126), transcript variant b1, mRNA [NM_198569]	GGTTTGCCTGCCTTAGTGGTGTCAGTTGTTCTAGCGAGCAGAAACAACAATGAAGTCTAT	chr6	142737201	142738468	+	FALSE	hs|6q24.1	ENST00000472054	57211	NM_198569	G protein-coupled receptor 126	GO:0007186|GO:0005886|GO:0004930|GO:0016021	NM_198569	THC2481239
FRMD3	0.00169818	2.0124	3.65312	3.9889	4.17478	3.95223	3.7906	3.80906	2.39066	3.29921	1.69106	3.11312	2.96353	3.79728	2.66837	2.17095	Homo sapiens FERM domain containing 3 (FRMD3), transcript variant 1, mRNA [NM_174938]	ATCCAGTCAGATCAAGACTGTATCAAGCAGCAAGATATTTTTTAAAGGAAGTAGATTTCG	chr9	85914033	85914092	-	FALSE	hs|9q21.32	ENST00000431299	257019	NM_174938	FERM domain containing 3	GO:0008092|GO:0005737|GO:0016021|GO:0005856|GO:0019898	NM_174938	THC2650863
DHCR24	0.000219706	3.64525	8.95189	8.07693	8.30471	8.27386	8.75541	8.00194	5.3908	5.5431	5.7974	6.56252	6.40792	6.32656	8.31347	5.27013	Homo sapiens 24-dehydrocholesterol reductase (DHCR24), mRNA [NM_014762]	TTTTCTTTAGAATCAGAATTGTAGCCAGTTTCTTTGGCCAGAAGGATGAATACTTGGATA	chr1	55315510	55315569	-	FALSE	hs|1p32.3	ENST00000535035	1718	NM_014762	24-dehydrocholesterol reductase	GO:0006695|GO:0008285|GO:0008762|GO:0005783|GO:0050660|GO:0007265|GO:0005634|GO:0044281|GO:0016628|GO:0005829|GO:0030539|GO:0008104|GO:0050614|GO:0042605|GO:0009888|GO:0061024|GO:0007050|GO:0009725|GO:0043154|GO:0005856|GO:0006979|GO:0042987|GO:0043066|GO:0000246|GO:0006915|GO:0000139|GO:0016020|GO:0005789|GO:0031639|GO:0043588|GO:0016021|GO:0019899|GO:0055114	NM_014762	THC2497269
MS4A8	0.014656	2.42641	7.63199	9.12891	8.72231	7.75964	9.09545	7.69212	7.00868	5.29643	3.33233	8.53726	5.82076	4.8294	5.11111	9.00248	Homo sapiens membrane-spanning 4-domains, subfamily A, member 8 (MS4A8), mRNA [NM_031457]	GTCTAGGAAACCATGCTGTTTCTCTATCAAGAAGAAGACAGAGATTTTAAACAGATGTTA	chr11	60483035	60483094	+	FALSE	hs|11q12.2	ENST00000300226	83661	NM_031457	membrane-spanning 4-domains, subfamily A, member 8	GO:0016021	NM_031457	THC2473175
FERD3L	6.51e-05	0.354827	3.95193	4.0234	4.16742	4.74249	3.53468	4.4884	5.7287	5.78483	5.23307	5.76011	4.82726	6.25715	6.16286	5.27697	Homo sapiens Fer3-like bHLH transcription factor (FERD3L), mRNA [NM_152898]	AACCTCAACGAGGCCTTTGACCAGCTGCGGAGGAAGGTGCCCACGTTTGCTTACGAGAAA	chr7	19184581	19184640	-	FALSE	hs|7p21.1	ENST00000275461	222894	NM_152898	Fer3-like bHLH transcription factor	GO:0050767|GO:0033504|GO:0046983|GO:0005634|GO:0048468|GO:0045892|GO:0003677|GO:0006351	NM_152898	THC2485988
SPARCL1	0.000836433	3.48796	15.2333	15.0262	14.681	14.9168	15.2333	14.4728	12.2013	11.5388	11.4013	12.9399	11.9955	14.2967	14.5211	12.7303	Homo sapiens SPARC-like 1 (hevin) (SPARCL1), transcript variant 2, mRNA [NM_004684]	TGTTCATAATATCATGTGCACTTCAAGAAAATGGAATGCTACTCTTTTGTGGTTTACGTG	chr4	88394538	88394597	-	FALSE	hs|4q22.1	ENST00000418378	8404	NM_004684	SPARC-like 1 (hevin)	GO:0007165|GO:0005509|GO:0005578|GO:0005615|GO:0070062	NM_004684	NP1160816
EXD3	0.000322769	2.52801	7.73663	8.47827	8.29405	8.21804	7.19675	7.86551	5.93972	6.60414	6.59703	6.4289	7.35254	6.0308	6.23626	7.47352	Homo sapiens exonuclease 3'-5' domain containing 3 (EXD3), transcript variant 1, mRNA [NM_017820]	AGGCCTGTAACTGTGACCAGTACCTAAAGGTCTCCAGGGACATGATGAAGCAGCTCATGT	chr9	140204095	140218178	-	FALSE	hs|9q34.3	ENST00000491734	54932	NM_017820	exonuclease 3'-5' domain containing 3	GO:0005515|GO:0008408|GO:0005737|GO:0090305|GO:0005634|GO:0003676|GO:0046872	NM_017820	THC2489884
MRAP	0.002323	5.58703	2.85011	6.59539	4.33369	5.24999	4.45259	3.52411	0.738164	0.770182	2.71987	0.77307	0.800996	0.932264	4.86975	1.07256	Homo sapiens melanocortin 2 receptor accessory protein (MRAP), transcript variant 2, mRNA [NM_206898]	ATTCCCGTGGACGAGAAGAAGCTGAAAGCCCACAAACATTCCATCGTGATCGCATTCTGG	chr21	33671352	33678973	+	FALSE	hs|21q22.11	ENST00000339944	56246	NM_206898	melanocortin 2 receptor accessory protein	GO:0005515|GO:0005886|GO:0005783|GO:0030819|GO:0031780|GO:0070996|GO:0031783|GO:0050873|GO:0031781|GO:0034394|GO:0031782|GO:0005789|GO:0016021	NM_206898	NP437695
CDH19	0.000190109	20.7059	2.96448	4.36734	5.61524	5.93109	4.98999	5.15052	0.960633	0.639807	0.609274	0.571698	0.639999	0.706732	0.991823	0.63738	Homo sapiens cadherin 19, type 2 (CDH19), transcript variant 1, mRNA [NM_021153]	ATGCTGTCATTGAACAGAGATGTGGGGAGAAATGTAAACAATCAGCTCACAGGCATCAAT	chr18	64171826	64171885	-	FALSE	hs|18q22.1	ENST00000262150	28513	NM_021153	cadherin 19, type 2	GO:0005886|GO:0005509|GO:0016021|GO:0007156	NM_021153	THC2475925
TACCAAGTGAAATTTAGAAGACGAGGTAAAACTGATTACGATACTCGGAAACGCTTGGTG	0.00143459	0.0683438	7.86735	7.57545	7.27444	8.44819	7.31459	7.81111	11.6941	12.8917	11.9064	11.7476	7.15474	11.8286	11.5833	9.12979	NA	NA	NA	NA	FALSE	NA	NA	NA	NA	NA	NA	NA	NA	NA	NA
MFAP4	0.00117817	4.34476	13.8869	13.6682	14.1636	12.2581	14.2193	12.9831	10.1541	11.471	11.7192	11.7037	8.58399	11.5035	12.6663	11.8314	Homo sapiens microfibrillar-associated protein 4 (MFAP4), transcript variant 2, mRNA [NM_002404]	AAATTACACCTGGAGTCAGGTGCAGAAGGGAACCTTGTATTTCACAGGCCTCATTTTGAT	chr17	19286813	19286872	-	FALSE	hs|17p11.2	ENST00000574313	4239	NM_002404	microfibrillar-associated protein 4	GO:0005515|GO:0009650|GO:0010712|GO:0001527|GO:0005576|GO:0071953|GO:0071493|GO:0031012|GO:0003674|GO:0030198|GO:0043206|GO:0007155|GO:0048251|GO:0070062	NM_002404	NP1211437
CDC42EP1	0.00409478	0.129677	8.80168	8.80076	9.04722	9.05026	9.11196	9.17795	12.573	12.6589	12.1229	12.1137	8.38199	12.3854	11.9535	9.24387	Homo sapiens CDC42 effector protein (Rho GTPase binding) 1 (CDC42EP1), mRNA [NM_152243]	TCGCCGCTCTGACTCTCTCTTGTCCTTCCGCCTGGACCTCGACCTTGGGCCCTCACTCCT	chr22	37964212	37964271	+	FALSE	hs|22q13.1	ENST00000249014	11135	NM_152243	CDC42 effector protein (Rho GTPase binding) 1	GO:0005515|GO:0005794|GO:0005886|GO:0008360|GO:0007266|GO:0015629|GO:0005100|GO:0005737|GO:0030838|GO:0032321|GO:0031274|GO:0017049|GO:0005925	NM_152243	THC2687110
PABPC1L	0.000163852	2.11844	9.15349	9.88738	9.99497	9.70477	9.7608	9.61402	8.18843	8.14683	9.00987	8.50551	9.3562	8.0863	8.21564	8.91508	Homo sapiens poly(A) binding protein, cytoplasmic 1-like (PABPC1L), mRNA [NM_001124756]	TGGAGATTGACAACTCAGAGCTGTTGCTCATGCTGGAGTCTCCAGAATCCCTCCATGCCA	chr20	43566771	43566830	+	FALSE	hs|20q13.12	ENST00000474208	80336	NM_001124756	poly(A) binding protein, cytoplasmic 1-like	GO:0006378|GO:0000166|GO:0003723|GO:0001556|GO:0070062	NM_001124756	NP1154985
GHR	0.0170948	0.45341	6.45267	6.91382	5.8062	6.11655	7.0499	6.20465	8.70089	6.79095	6.9982	8.33076	6.60278	6.85335	8.13463	6.86727	Homo sapiens growth hormone receptor (GHR), transcript variant 1, mRNA [NM_000163]	AACTTAAATAGTATTTCCCATTTATCGCAGACCTTTTTTAGGAAGCAAGCTTAATGGCTG	chr5	42721449	42721508	+	FALSE	hs|5p12	ENST00000230882	2690	NM_000163	growth hormone receptor	GO:0005515|GO:0042977|GO:0006549|GO:0005886|GO:0019530|GO:0000255|GO:0019221|GO:0050731|GO:0042523|GO:0060396|GO:0060397|GO:0005615|GO:0042803|GO:0032870|GO:0031623|GO:0006101|GO:0000187|GO:0019838|GO:0006105|GO:0040014|GO:0006103|GO:0006631|GO:0044236|GO:0070195|GO:0006573|GO:0040018|GO:0070064|GO:0032355|GO:0004896|GO:0009986|GO:0019901|GO:0042517|GO:0006107|GO:0046898|GO:0005576|GO:0046449|GO:…	NM_000163	THC2472139
GAS1	0.000446713	8.26031	8.90621	8.64371	7.74221	8.78059	10.7512	8.02006	5.6045	6.53207	5.71704	5.55826	5.48176	5.82313	7.42266	5.75125	Homo sapiens growth arrest-specific 1 (GAS1), mRNA [NM_002048]	GGATTAAGGGTCCAAAAATGCTGATCTAAGGGGTTGCCATGGTGTTGAACAATGCAACTT	chr9	89559894	89559953	-	FALSE	hs|9q21.33	ENST00000298743	2619	NM_002048	growth arrest-specific 1	GO:0005515|GO:0035924|GO:0030308|GO:0005886|GO:0060628|GO:0050680|GO:0048592|GO:0045879|GO:0048701|GO:0045880|GO:0048589|GO:0007411|GO:2001240|GO:0042476|GO:0060021|GO:0021904|GO:0007050|GO:0042474|GO:0043010|GO:0042473|GO:0046658|GO:0050679|GO:0021587|GO:0002053|GO:0042981|GO:0012501|GO:0045165|GO:0008589|GO:0045930|GO:0016021|GO:0010955|GO:0042733	NM_002048	THC2462012
RAX2	0.00984178	0.498865	5.76563	6.91407	6.97021	7.07843	6.02116	6.16705	7.77558	8.35899	7.81567	7.36227	6.21804	7.66574	7.41813	7.16888	Homo sapiens retina and anterior neural fold homeobox 2 (RAX2), mRNA [NM_032753]	CACCCAATGTCACCGCACACCAGGCAGTGGGGACACGGCAGTAAGCACAAGAAAGATTTT	chr19	3769405	3769464	-	FALSE	hs|19p13.3	ENST00000555978	84839	NM_032753	retina and anterior neural fold homeobox 2	GO:0043565|GO:0006355|GO:0005634|GO:0007601|GO:0050896|GO:0006351	NM_032753	NP340726
TMC8	0.00724434	0.286322	11.8286	11.3853	11.6334	10.968	11.1455	11.5485	13.823	13.3988	13.4213	13.7527	10.9456	12.923	13.934	11.32	Homo sapiens cDNA FLJ43684 fis, clone TBAES2001492. [AK125672]	GGCAACAAAGCAAGACCCTGGTCTCCACCAAAAATAAGTAATTAATTTTTTAAAAGGAGA	chr17	76135625	76135684	+	FALSE	hs|17q25.3	NA	147138	AK125672	transmembrane channel-like 8	GO:0005515|GO:0032091|GO:0031965|GO:0005794|GO:0005783|GO:0005102|GO:0001558|GO:0005615|GO:0005737|GO:0055069|GO:0005789|GO:0016021|GO:0070062|GO:0006811|GO:0032460	NA	THC2480490
CCATTTGAGGGGAGAGGGAACGGAAATAAAGGAGTTATTTGTAATGACTAAGCATGGGGA	0.00767976	2.12793	9.03253	9.04882	8.87993	8.73573	8.01097	7.50166	7.38841	7.34128	7.2188	8.55187	7.79402	7.75493	6.63452	6.73089	chr2	29415631	29415690	-	FALSE	hs|2p23.2	NA	NA	NA	NA	NA	NA	NA	NA	NA
FAM109A	0.00086624	0.41446	7.73537	8.01247	7.87393	7.92791	8.06528	7.9745	9.49348	9.59381	9.39481	9.43726	8.04067	9.40058	9.30318	8.201	Homo sapiens family with sequence similarity 109, member A (FAM109A), transcript variant 2, mRNA [NM_144671]	CCAAAACCCCTTCCTTCTGTCTCTGGAGACCCTTGAGCTTGGGGAAATATGGAGGGGTGT	chr12	111799141	111799200	-	FALSE	hs|12q24.12	ENST00000548163	144717	NM_144671	family with sequence similarity 109, member A	GO:0005802|GO:0005515|GO:0001881|GO:0030136|GO:0042147|GO:0007032|GO:0055037|GO:0042803|GO:0005769	NM_144671	THC2491205
OSBPL6	0.000161006	4.22507	11.27	11.0664	11.1049	11.141	11.0047	10.7446	7.56687	7.92188	10.4337	7.93585	9.34338	9.02672	9.05577	8.18097	Homo sapiens oxysterol binding protein-like 6 (OSBPL6), transcript variant 1, mRNA [NM_032523]	GTTTAGCAAAGTAGACAGCCCTGTTCTTTGGTAGACTGGGAATGTAGAGCTAGCCAACAT	chr2	179260253	179260312	+	FALSE	hs|2q31.2	ENST00000315022	114880	NM_032523	oxysterol binding protein-like 6	GO:0005515|GO:0031965|GO:0005886|GO:0006869|GO:0097038|GO:0008289|GO:0005829	NM_032523	THC2488691
hydroxy-delta-5-steroid dehydrogenase, 3 beta, pseudogene 1 [Source:HGNC Symbol;Acc:HGNC:5219] [ENST00000286193]	0.00659065	0.384853	4.45331	4.16616	4.18374	4.30321	3.97023	3.68768	4.87753	5.40459	4.82578	4.54214	4.83336	7.15778	4.8022	5.51671	AGAATCGACACAAACAAGAGCATCTGGAAAACACATGGTCTGCTCCATATCCATACAGCA	chr1	120015731	120015790	+	FALSE	hs|1p12	ENST00000286193	NA	NA	NA	NA	NA	THC2635765	NA
MKX	0.0182236	3.20236	6.88881	6.80038	6.47583	9.44005	6.5588	7.64541	0.836373	0.875985	8.20531	1.07098	6.17179	5.50152	1.27144	6.95353	Homo sapiens mohawk homeobox (MKX), transcript variant 1, mRNA [NM_173576]	GCATGTCAATGAAAACTAAAGACAAATACTTCACTCTTTTTCATACTATTATAAGTTATT	chr10	27962329	27962388	-	FALSE	hs|10p12.1	ENST00000375790	283078	NM_173576	mohawk homeobox	GO:0006366|GO:0005634|GO:0000122|GO:0000978|GO:0045662|GO:0001078|GO:0002932|GO:0001077|GO:0007517|GO:0032967|GO:0035990|GO:0045944|GO:0030199|GO:0001085	NM_173576	THC2473842
TPM4	6.64e-05	0.432241	9.54672	9.93538	9.67831	9.79067	10.5148	9.76326	11.3063	11.5885	10.6468	11.4073	11.0457	10.4716	10.756	11.3366	Homo sapiens tropomyosin 4 (TPM4), transcript variant Tpm4.2, mRNA [NM_003290]	CTCTTCTCTTTTAAGAAGTTCCTTTTGTTATTGCCATCTTAGCTTTGCTGGAAATGTCAA	chr19	16212210	16212269	+	FALSE	hs|19p13.12	ENST00000591645	7171	NM_003290	tropomyosin 4	GO:0001725|GO:0005862|GO:0030049|GO:0005509|GO:0002102|GO:0006928|GO:0003779|GO:0001649|GO:0005829|GO:0031941|GO:0006936|GO:0016020|GO:0030863|GO:0005856|GO:0008307|GO:0005925|GO:0070062	NM_003290	THC2506801
GATGAGACACAGGTCCCAAAGAAGAAATTATTTCAAGTGGAAAATTATTCTCAGCCTACT	0.000725724	0.325076	4.57876	3.04764	4.73559	3.95808	3.61137	4.10795	5.54986	5.72037	5.5597	6.19673	6.28364	6.28945	4.54649	4.71277	NA	NA	NA	NA	FALSE	NA	NA	NA	NA	NA	NA	NA	NA	NA	NA
HMX2	0.017817	0.415608	8.276	8.55247	8.47754	8.29347	8.23987	7.96527	10.0364	10.0213	9.88762	9.665	7.53469	9.85882	9.79067	8.09015	Homo sapiens H6 family homeobox 2 (HMX2), mRNA [NM_005519]	GCCTTTCCTCTCTCCTTCGCACTCGGACTTTAAAGAAGAGAAAGAGAGGCTCCTGCCCGC	chr10	124909135	124909194	+	FALSE	hs|10q26.13	ENST00000339992	3167	NM_005519	H6 family homeobox 2	GO:0048026|GO:0043565|GO:0008284|GO:0006355|GO:0042472|GO:0007420|GO:0005634|GO:0030154|GO:0006351	NM_005519	THC2478985
ANKRD33B	3.21e-06	0.0396305	6.87704	7.45396	6.76092	6.63083	7.00412	4.90388	12.6291	10.689	8.63585	10.7694	11.3562	10.9948	11.8512	11.8442	Homo sapiens ankyrin repeat domain 33B (ANKRD33B), mRNA [NM_001164440]	CACAGTTCAGTTTTTGAGGGAACTAGTTTTGTCATAATACTACACCCCTCTATTGTTTTT	chr5	10657025	10657084	+	FALSE	hs|5p15.2	ENST00000607560	651746	NA	ankyrin repeat domain 33B	NA	NM_001164440	THC2707778
CYP4X1	0.0394666	0.4279	8.42054	8.37195	7.44786	7.07654	7.95179	7.64888	9.512	7.90514	7.17335	10.1754	9.46678	8.47104	9.72026	8.15428	Homo sapiens cytochrome P450, family 4, subfamily X, polypeptide 1 (CYP4X1), mRNA [NM_178033]	CACAGTGTGTCAGCTAGATCTGTTTCTATATAACTTTGGGAGATTTTCAGATCTTTTCTG	chr1	47516002	47516061	+	FALSE	hs|1p33	ENST00000371901	260293	NM_178033	cytochrome P450, family 4, subfamily X, polypeptide 1	GO:0070330|GO:0005506|GO:0005789|GO:0016021|GO:0055114|GO:0020037	NM_178033	THC2464026
PTTG1	0.000532031	2.41395	11.1574	10.3739	10.7059	10.0124	10.5883	10.3058	8.2927	8.12928	7.27025	7.94066	8.79455	10.7007	10.3727	9.26102	Homo sapiens pituitary tumor-transforming 1, mRNA [NM_004121]		chr5	159848829	159855748	-	FALSE	hs|5q33.3	ENST00000517480	9232	NM_001282382	pituitary tumor-transforming 1	GO:0005634|GO:0005737|GO:0005829|GO:0000981|GO:0003700|GO:0004869	NM_001282382	NP_001269311
CAMSAP3	5.88e-08	5.21215	7.17719	7.23535	7.2625	7.04173	7.00719	7.44942	4.54883	4.98431	4.68314	5.4741	4.2521	4.56063	5.20459	4.4224	Homo sapiens calmodulin regulated spectrin-associated protein family, member 3 (CAMSAP3), transcript variant 1, mRNA [NM_001080429]	CACGGCTGTACAAAGAACCCAGCGCCAAGTCCAACAAGTTCATCATCCACAATGCCCTAT	chr19	7682432	7682491	+	FALSE	hs|19p13.2	ENST00000160298	57662	NM_001080429	calmodulin regulated spectrin-associated protein family, member 3	GO:0090136|GO:0070507|GO:0005915|GO:0005813|GO:0005737|GO:0034453|GO:0010923|GO:0051011|GO:0000226|GO:0045218|GO:0033043	NM_001080429	NP1134247
MAATS1	0.000490366	0.388591	8.39735	9.18116	9.11178	8.85092	8.4831	8.8019	10.9471	9.96719	10.9278	9.90613	10.3879	9.2227	9.70984	9.51755	Homo sapiens MYCBP-associated, testis expressed 1 (MAATS1), mRNA [NM_033364]	TTGTAAAAGAAGCTGTACGAATCATCATAAATAATTCCAATAGTCTGCACTTCTCCCAAG	chr3	119483911	119483970	+	FALSE	hs|3q13.33	ENST00000496010	89876	NM_033364	MYCBP-associated, testis expressed 1	GO:0005739|GO:0005515	NM_033364	THC2482240
TMED10	7.45e-06	2.06288	12.0109	12.4024	11.881	12.3053	11.9719	12.4147	11.4915	11.101	11.1038	11.0809	11.1717	10.5008	11.3052	11.15	Homo sapiens transmembrane emp24-like trafficking protein 10 (yeast) (TMED10), mRNA [NM_006827]	TGCCTTTCCCCTTTTTAGGAGCAACGAAAGCTACTCTCTTAGTTATGTTCTTGTGATGTG	chr14	75598669	75598728	-	FALSE	hs|14q24.3	ENST00000303575	10972	NM_006827	transmembrane emp24-like trafficking protein 10 (yeast)	GO:0005515|GO:0005801|GO:0035459|GO:0005886|GO:0030137|GO:0005783|GO:0048208|GO:0051259|GO:0006886|GO:0032403|GO:0048205|GO:0035964|GO:0045055|GO:0033116|GO:0007030|GO:0030140|GO:0070062|GO:0030658|GO:0019905|GO:0042470|GO:0005793|GO:0005794|GO:0070765|GO:0001822|GO:0006890|GO:0043279|GO:0006888|GO:0042589|GO:0048199|GO:0000139|GO:0005789|GO:0016021|GO:0030667	NM_006827	THC2505873
FAM124B	0.00515628	0.19838	3.29291	4.45259	4.44363	4.99771	5.41274	4.45585	6.14311	4.76505	5.23533	5.39162	7.62652	8.70468	6.56813	6.91407	Homo sapiens family with sequence similarity 124B (FAM124B), transcript variant 2, mRNA [NM_024785]	TACAAACCAAAGAGGAACATTGAGCACAGTGGGAAAATTGGACTGGTTGATCTGGTCACT	chr2	225243527	225243586	-	FALSE	hs|2q36.2	ENST00000389874	79843	NM_024785	family with sequence similarity 124B	GO:0005515	NM_024785	THC2480287
SSTR5-AS1	0.000113525	0.470783	4.01688	4.18613	4.05063	3.66636	3.5017	3.67024	5.13844	4.31121	4.36153	5.19276	5.56299	5.00583	4.72911	4.92116	Homo sapiens SSTR5 antisense RNA 1 (SSTR5-AS1), long non-coding RNA [NR_027242]	CCCGGATCAGCGTGGTCCAAAAGGACTTATCGTTAAAAGTGCTGGTCCCAGAACCCAAGG	chr16	1115321	1115380	-	FALSE	hs|16p13.3	ENST00000569832	146336	NR_027242	SSTR5 antisense RNA 1	NA	NR_027242	THC2478752
TBC1D8	0.0453912	2.00366	10.155	9.39171	11.0917	9.00462	10.1001	9.01618	9.32749	8.24977	8.93391	9.3212	8.64192	9.92347	8.55595	7.97839	Homo sapiens TBC1 domain family, member 8 (with GRAM domain) (TBC1D8), mRNA [NM_001102426]	TTCACTTTATATGTCCTTCCAAAAATGTTGTTGTGTACAAACCATGCTTTCAATGTTGGC	chr2	101623725	101623784	-	FALSE	hs|2q11.2	NA	11138	NM_001102426	TBC1 domain family, member 8 (with GRAM domain)	GO:0008284|GO:0016020|GO:0008015|GO:0032851|GO:0005097	NM_001102426	THC2463776
ARHGEF17	5.75e-05	0.426553	12.3167	12.3299	12.2477	11.7841	12.32	11.8265	12.5587	12.8972	13.6649	13.8582	13.7827	13.1629	13.4572	13.227	Homo sapiens Rho guanine nucleotide exchange factor (GEF) 17 (ARHGEF17), mRNA [NM_014786]	TCTTCAGCTAAAACTCCAAAGGTTTGGTTTCAGATGGGGTTTGTTTTGTTCTGTTTGGTT	chr11	73079944	73080003	+	FALSE	hs|11q13.4	ENST00000263674	9828	NM_014786	Rho guanine nucleotide exchange factor (GEF) 17	GO:0043547|GO:0005085|GO:0051056|GO:0048011|GO:0043065|GO:0030036|GO:0032321|GO:0007264|GO:0005089|GO:0097190|GO:0005829	NM_014786	THC2461891
CUZD1	0.0189196	0.479709	6.64582	7.40764	7.34298	7.68778	7.20915	7.38752	9.16906	8.27428	8.3986	6.9953	8.51433	8.71815	6.84457	8.6411	Homo sapiens CUB and zona pellucida-like domains 1 (CUZD1), transcript variant 1, mRNA [NM_022034]	GGTGACTGTAGCGACAATCACAGTGAGGCATTTTGTAAATCAACGGGCAGACTACAAATA	chr10	124591816	124591875	-	FALSE	hs|10q26.13	ENST00000545804	50624	NM_022034	CUB and zona pellucida-like domains 1	GO:0006931|GO:0007049|GO:0042589|GO:0008283|GO:0032023|GO:0016021|GO:0051301|GO:0030658	NM_022034	NP790056
GLI3	0.00019055	3.85668	8.07144	7.34191	7.75028	6.47534	7.66638	6.75717	4.33296	4.52263	4.68598	5.00126	5.25195	6.26255	6.82546	5.03162	Homo sapiens GLI family zinc finger 3 (GLI3), mRNA [NM_000168]	GACTCTGAAAAACCCTAAAGTATTCTAGGGAGAAACTGTCTTCCATTTCAGTTTTGAATC	chr7	42003711	42003770	-	FALSE	hs|7p14.1	ENST00000479210	2737	NM_000168	GLI family zinc finger 3	GO:0046638|GO:0001656|GO:0005515|GO:0043627|GO:0001658|GO:0003700|GO:0008013|GO:0048593|GO:0021861|GO:0046639|GO:0007224|GO:0007507|GO:0048589|GO:0021798|GO:0016485|GO:0007411|GO:0017053|GO:0035035|GO:0033077|GO:0000122|GO:0000978|GO:0001701|GO:0005929|GO:0022018|GO:0016592|GO:0042060|GO:0042307|GO:0005654|GO:0045893|GO:0043586|GO:0045892|GO:0021631|GO:0042733|GO:0043585|GO:0008285|GO:0042826|GO:…	NM_000168	THC2758350
ITGA2	8.34e-05	4.54971	8.4561	8.31678	8.02109	8.82678	9.6227	8.05819	5.85767	5.35909	5.36473	5.68494	5.93372	6.76658	8.18049	5.97511	Homo sapiens integrin, alpha 2 (CD49B, alpha 2 subunit of VLA-2 receptor) (ITGA2), transcript variant 1, mRNA [NM_002203]	AGTCCAGGGCTATCTGTACTGTTTACAGAATTACTTTGTAGTTGACAACACAAAACAAAC	chr5	52388268	52388327	+	FALSE	hs|5q11.2	ENST00000296585	3673	NM_002203	integrin, alpha 2 (CD49B, alpha 2 subunit of VLA-2 receptor)	GO:0005515|GO:0014070|GO:0005518|GO:0030879|GO:0033591|GO:0014075|GO:0051971|GO:0060100|GO:0007411|GO:0001618|GO:0030198|GO:0009887|GO:0033343|GO:0008305|GO:0038065|GO:0046982|GO:0009986|GO:0014850|GO:0031589|GO:0038064|GO:0045785|GO:0005178|GO:0031346|GO:0032967|GO:0007229|GO:0010694|GO:0043236|GO:0043388|GO:0009279|GO:0043589|GO:0005925|GO:0009897|GO:0048471|GO:0033627|GO:0005886|GO:0008283|GO:…	NM_002203	THC2498883
BX117479 NCI_CGAP_Lu19 Homo sapiens cDNA clone IMAGp998I075985, mRNA sequence [BX117479]	0.00222756	3.29782	7.29197	8.11314	7.15778	6.83851	6.51909	6.35776	3.87286	6.41181	3.06817	4.68731	4.63963	5.92372	5.55668	6.37339	CCTGCTGATAAAAGGCATCTTGTGTCTTGTTCATCCTTAGCAAATTGCCAATTAGCAAAG	chr8	54424699	54424758	-	FALSE	hs|8q11.23	NA	NA	BX117479	NA	NA	NA	THC2649218	NA
PLSCR4	0.00221374	2.97671	9.63066	9.39304	8.46413	9.9279	9.36478	9.43752	6.71486	5.4152	8.92293	8.34104	6.7852	8.11314	8.12142	7.86797	Homo sapiens phospholipid scramblase 4 (PLSCR4), transcript variant 2, mRNA [NM_020353]	TCAGGGTAAATTTGTTTTTCTGAGTTTCTCGTAATGCTCATTTTTACATGCTGCTACTAG	chr3	145910619	145910678	-	FALSE	hs|3q24	ENST00000354952	57088	NM_020353	phospholipid scramblase 4	GO:0005515|GO:0017121|GO:0017124|GO:0071222|GO:0042609|GO:0005886|GO:0017128|GO:0005509|GO:0016021|GO:0019899|GO:0070062	NM_020353	THC2490543
SEMA6A	1.35e-05	3.37306	5.46857	5.24156	4.88379	5.45256	5.70692	5.54888	3.46134	3.67717	2.31989	3.94959	3.63529	3.22019	4.26192	3.94588	Homo sapiens sema domain, transmembrane domain (TM), and cytoplasmic domain, (semaphorin) 6A (SEMA6A), transcript variant 2, mRNA [NM_020796]	TATTGTTTTCTTCCTTGAATTTTCTCTAGAAATGCAGAAATTAGGAAGGTGATGGGTCTG	chr5	115779790	115779849	-	FALSE	hs|5q23.1	ENST00000343348	57556	NM_020796	sema domain, transmembrane domain (TM), and cytoplasmic domain, (semaphorin) 6A	GO:0005515|GO:0030424|GO:0005886|GO:0007411|GO:0007010|GO:0009887|GO:0006915|GO:0004872|GO:0016021|GO:0007166|GO:0007399	NM_020796	THC2495905
VASH2	5.38e-05	3.55939	10.181	9.31707	9.7571	10.0117	9.22054	10.6	8.13841	8.64029	8.34595	7.96627	7.33099	8.00645	8.37992	7.50793	Homo sapiens vasohibin 2 (VASH2), transcript variant 1, mRNA [NM_024749]	AGTCAACAGATGTTATTTCAGTCTCAGTGCATCTCCTCTGGCTTTCTTTGACTGAAGGTG	chr1	213163328	213163387	+	FALSE	hs|1q32.3	ENST00000366965	79805	NM_024749	vasohibin 2	GO:0005737|GO:0001938|GO:0045766	NM_024749	THC2482158
FOLR1	0.0111499	2.06849	11.7192	11.5301	12.0032	12.2111	11.4493	11.418	10.6247	11.9202	10.9164	10.2044	8.67272	10.2378	11.4003	8.85411	Homo sapiens folate receptor 1 (adult) (FOLR1), transcript variant 1, mRNA [NM_016725]	CCACAGCTCCCAACTATTTGGTTCCTGCTCCATGGTCGGGCCTCTGACAGCCACTTTGAA	chr11	71907268	71907327	+	FALSE	hs|11q13.4	ENST00000393679	2348	NM_016725	folate receptor 1 (adult)	GO:0005886|GO:0009986|GO:0015884|GO:0030136|GO:0031526|GO:0008517|GO:0031362|GO:0006898|GO:0005542|GO:0016324|GO:0016020|GO:0005887|GO:0046655|GO:0004872|GO:0070062|GO:0005768	NM_016725	NP226704
RANBP3L	0.000271815	7.65619	6.49439	6.69827	6.77466	7.34029	6.16457	6.68325	2.5801	2.49635	0.995274	0.932526	3.49426	4.67209	5.7415	2.5048	Homo sapiens RAN binding protein 3-like (RANBP3L), transcript variant 2, mRNA [NM_145000]	GAAAGCTGTGATGAGAATGAGGATGATTTCATCCAAGTCACTAAAAATGGATCAGATCCT	chr5	36249795	36251469	-	FALSE	hs|5p13.2	ENST00000296604	202151	NM_145000	RAN binding protein 3-like	GO:0046907	NM_145000	THC2475367
DCT	0.00115428	0.48659	8.05179	7.52268	7.87433	7.5739	7.43505	7.57131	9.09404	8.83475	8.98235	9.09563	7.5102	8.94746	8.48026	8.24006	Homo sapiens dopachrome tautomerase (DCT), transcript variant 1, mRNA [NM_001922]	CCCTATTGGTCACAATCGGATGTACAACATGGTTCCTTTCTTCCCTCCAGTGACTAATGA	chr13	95095746	95095805	-	FALSE	hs|13q32.1	ENST00000446125	1638	NM_001922	dopachrome tautomerase	GO:0033162|GO:0042470|GO:0021847|GO:0005507|GO:0002052|GO:0005829|GO:0004167|GO:0006583|GO:0008544|GO:0016491|GO:0016021|GO:0048468|GO:0055114|GO:0048066	NM_001922	NP220864
LINC01013	0.00280387	0.407046	6.19373	5.6722	5.66224	5.99934	4.92618	6.05242	7.4034	7.02118	6.95422	7.95107	7.00236	7.39832	6.43598	5.4941	Homo sapiens long intergenic non-protein coding RNA 1013 (LINC01013), long non-coding RNA [NR_038981]	CCCACCAAAAGCCCCAGGGAAATCTATCTGTCTGTATGGTATGGTAATGACTGAGGTTAT	chr6	132490306	132490365	+	FALSE	hs|6q23.2	ENST00000436112	100507254	NR_038981	long intergenic non-protein coding RNA 1013	NA	NR_038981	THC2632552
IL36A	0.00043756	0.360927	4.43292	3.91756	4.41384	4.34466	4.26318	4.48152	6.27759	6.04662	5.83298	6.22137	4.67762	6.06098	5.66276	4.61863	Homo sapiens interleukin 36, alpha (IL36A), mRNA [NM_014440]	AACCCGAGCCTGTGAAGTCCTTTCTCTTCTACCACAGCCAGAGTGGCAGGAACTCCACCT	chr2	113765437	113765496	+	FALSE	hs|2q13	ENST00000259211	27179	NM_014440	interleukin 36, alpha	GO:0032755|GO:0006955|GO:0005149|GO:0006954|GO:0045087|GO:0019221|GO:0005576|GO:0005615|GO:0005125	NM_014440	THC2645991
CDSN	0.00131695	0.255246	7.23872	7.28621	7.24715	7.20149	6.96199	6.98529	9.63166	9.54946	9.35757	9.38865	7.27886	9.23991	9.41474	7.39653	Homo sapiens corneodesmosin (CDSN), mRNA [NM_001264]	GGCAGCAAGTCCAGCTCTTCTGGTCACCCTTGCATGTCTGTCTCCTCCTTGACACTGACT	chr6	31083988	31084047	-	FALSE	hs|6p21.33	ENST00000445893	1041	NM_001264	corneodesmosin	GO:0030057|GO:0016337|GO:0008544|GO:0030216|GO:0005911|GO:0043589|GO:0007155|GO:0042803|GO:0001533|GO:0070062	NM_001264	THC2464424
FAM43B	0.000844999	0.142627	7.21696	8.30815	6.87819	5.62261	5.65021	4.91356	10.5384	8.36821	9.34452	10.6908	9.31252	9.67629	9.76176	7.79822	Homo sapiens family with sequence similarity 43, member B (FAM43B), mRNA [NM_207334]	ACAAAAAGCCCAAAGATCTATGTGTCACTGATCATTGTAAATAAAGTGGACCTGCTTTTA	chr1	20881440	20881499	+	FALSE	hs|1p36.12	ENST00000332947	163933	NM_207334	family with sequence similarity 43, member B	NA	NM_207334	THC2476851
MUC15	0.00146456	5.04273	5.43578	6.58536	6.75812	7.95721	6.70078	7.58174	1.98759	6.44335	4.06651	1.93593	2.25601	4.47731	5.99401	2.80022	Homo sapiens mucin 15, cell surface associated (MUC15), transcript variant 2, mRNA [NM_145650]	ACTGTCACGTGGATTTTGTCAAGGAGAATCATAAAAGCAGGAGACCAGTAGCAGAAATGT	chr11	26582464	26582523	-	FALSE	hs|11p14.2	ENST00000527569	143662	NM_145650	mucin 15, cell surface associated	GO:0006493|GO:0005886|GO:0005796|GO:0016266|GO:0005576|GO:0016021|GO:0044267|GO:0043687	NM_145650	THC2488202
MSRB3	0.00122122	0.486723	5.52675	5.49116	5.68029	5.65933	5.98163	5.36504	6.38918	6.86088	6.80491	7.35448	5.78505	6.53052	5.87934	7.04948	Homo sapiens methionine sulfoxide reductase B3 (MSRB3), transcript variant 2, mRNA [NM_001031679]	AATGTATTGATACTCTCAGGGCAAATTCACTATATTGCTATACAGTTGAGATCAGTGTTG	chr12	65858731	65858790	+	FALSE	hs|12q14.3	ENST00000614640	253827	NM_001031679	methionine sulfoxide reductase B3	GO:0005739|GO:0005783|GO:0030091|GO:0033743|GO:0008270|GO:0006979|GO:0055114	NM_001031679	THC2571089
GPR144	0.00280054	3.61294	7.85124	6.71092	7.16142	5.73212	5.84273	5.74235	4.76568	4.5025	5.04763	5.45518	5.74535	3.29558	5.06634	3.75258	PREDICTED: Homo sapiens G protein-coupled receptor 144 (GPR144), mRNA [XM_006717348]	AGCCATCATCTCCTCTGAAGTGTGGGACGTCACTGGAGAGGTCAACGTGGCCATGACCTT	chr9	127220919	127220978	+	FALSE	hs|9q33.3	NA	347088	XM_006717348	G protein-coupled receptor 144	GO:0007186|GO:0005886|GO:0004930|GO:0016021	XM_006717348	THC2601229
YAP1	0.000184444	3.00159	8.51512	8.18737	8.55079	7.99448	8.66766	7.66289	6.07798	5.70285	5.74235	6.32288	6.52042	7.59015	7.71423	6.56705	Homo sapiens Yes-associated protein 1 (YAP1), transcript variant 2, mRNA [NM_006106]	AGCTTTGAGTTCTGACATCCTTAATGACATGGAGTCTGTTTTGGCTGCCACCAAGCTAGA	chr11	102100584	102100643	+	FALSE	hs|11q22.2	ENST00000531439	10413	NM_006106	Yes-associated protein 1	GO:0005515|GO:2001237|GO:0010467|GO:0008284|GO:0006367|GO:0030054|GO:0044212|GO:0008283|GO:0010837|GO:0090263|GO:0060242|GO:0005634|GO:0071480|GO:2000737|GO:0005829|GO:0003143|GO:0005737|GO:0030857|GO:0045944|GO:0072307|GO:0070064|GO:0035019|GO:0005667|GO:0048339|GO:0046622|GO:0003714|GO:0003713|GO:0035329|GO:0000979|GO:0006974|GO:0000902|GO:0048368|GO:0001076|GO:0016020|GO:0030216|GO:0072091|GO:…	NM_006106	NP796537
NPAS3	5.41e-05	3.68605	6.38775	6.63614	6.58047	6.55046	6.22889	6.0703	3.43206	3.56693	5.50039	4.05632	4.32328	4.9989	5.03583	4.07725	Homo sapiens neuronal PAS domain protein 3 (NPAS3), transcript variant 2, mRNA [NM_022123]	TCAAGATGGAAAGAGACAAGCATAAACAATGTGCCCTGTTTGACTAAGTCAAATGAAATA	chr14	34270706	34270765	+	FALSE	hs|14q13.1	ENST00000346562	64067	NM_022123	neuronal PAS domain protein 3	GO:0001964|GO:0042711|GO:0007165|GO:0005737|GO:0046983|GO:0007626|GO:0005654|GO:0004871|GO:0045893|GO:0003677|GO:0006351	NM_022123	THC2476625
KIAA0125	0.0476518	0.440499	4.60258	4.17629	4.68788	4.66635	4.78875	5.46259	6.5743	6.68441	5.67454	5.84498	3.53935	6.49958	6.05791	4.63525	Homo sapiens KIAA0125 (KIAA0125), long non-coding RNA [NR_026800]	ACATTGGGAAGGGATGGAGGATGGACGGAGGAAGGACGTGCAGTTGCAGCTCTTTCTGCA	chr14	106388126	106388185	+	FALSE	hs|14q32.33	ENST00000612938	9834	NR_026800	KIAA0125	NA	NR_026800	THC2483256
FNPBXF03 FNP Homo sapiens cDNA, mRNA sequence [CD239706]	0.00429052	2.07363	9.06245	8.94838	9.25457	8.39002	8.87572	9.13749	7.19829	8.15366	7.74379	7.62097	8.46394	6.01495	8.41233	8.37829	CTTTGTTTGAGAAGTTCCTAATGCAGTAGGAGAACAAAGTGACAGTTTTCTTATTTACTG	chr6	7147889	7147948	+	FALSE	hs|6p24.3	NA	NA	CD239706	NA	NA	NA	THC2654534	NA
GLP2R	0.000774497	0.448885	5.17964	4.75597	5.12896	4.7838	4.94962	4.77909	6.15911	6.20445	6.27711	6.07382	4.87034	6.68698	6.32879	5.46701	Homo sapiens glucagon-like peptide 2 receptor (GLP2R), mRNA [NM_004246]	CCCTCACTCCACAAATGGGGTGATCAACACTTACTGCTTGCTCTTGTTCTGCTAATGATT	chr17	9795340	9795399	+	FALSE	hs|17p13.1	ENST00000262441	9340	NM_004246	glucagon-like peptide 2 receptor	GO:0008284|GO:0005886|GO:0071377|GO:0004930|GO:0007188|GO:0016021|GO:0004967	NM_004246	THC2601085
lnc-JMJD7-PLA2G4B-1	0.021423	3.57663	10.455	8.53895	8.75323	7.10883	8.07846	8.03164	6.88019	6.88466	6.75177	6.76881	6.8977	7.90575	7.08515	6.96524	Homo sapiens cDNA FLJ33063 fis, clone TRACH2000047. [AK057625]	CTGTTTGGCCACGACTGATTGCAGCCCCTGGTGAAATGAGAACCCTGTGGGTCGGAACAA	chr15	42188025	42188084	+	FALSE	hs|15q15.1	NA	NA	AK057625	lnc-JMJD7-PLA2G4B-1:2	NA	NA	THC2627263
PDE4C	2.09e-05	0.234788	6.50633	6.87271	6.80061	6.66606	6.74774	7.03478	9.85373	8.10658	8.15929	8.73144	8.45392	8.49713	9.52138	8.59907	Homo sapiens phosphodiesterase 4C, cAMP-specific (PDE4C), transcript variant 1, mRNA [NM_000923]	ACAGCTTTAGCCAAAGAGGCCTTGGAGTTGCCTGACACTGAACTCCTGTCCCCTGAAGCC	chr19	18321784	18321843	-	FALSE	hs|19p13.11	ENST00000599188	5143	NM_000923	phosphodiesterase 4C, cAMP-specific	GO:0007165|GO:0004115|GO:0072372|GO:0005615|GO:0046872|GO:0006198|GO:0005829	NM_000923	NP081280
SLC11A2	0.00485109	0.352686	7.42215	7.44563	7.36806	7.38155	7.07955	7.24715	9.23047	9.31054	8.91013	8.6708	6.9413	9.37332	9.13035	7.46958	Homo sapiens solute carrier family 11 (proton-coupled divalent metal ion transporter), member 2 (SLC11A2), transcript variant 2, mRNA [NM_001174126]	TAATATTTGGATAGCCCGCCCATGTATTTTCTTCCCACTATTCCCATTAACATACCAAAC	chr12	51374546	51374605	-	FALSE	hs|12q13.12	ENST00000262051	4891	NM_001174126	solute carrier family 11 (proton-coupled divalent metal ion transporter), member 2	GO:0005802|GO:0005515|GO:0015078|GO:0035434|GO:0005765|GO:0005764|GO:0010042|GO:0006879|GO:0070835|GO:0006878|GO:0022890|GO:0071356|GO:0070574|GO:0010039|GO:0007611|GO:0016151|GO:0010288|GO:0015692|GO:0005506|GO:0009986|GO:0015099|GO:0005507|GO:0015087|GO:0015086|GO:0015085|GO:0015093|GO:0015100|GO:0015094|GO:0060586|GO:0006783|GO:0003032|GO:0005887|GO:0008270|GO:0071421|GO:0046686|GO:0071281|GO:…	NM_001174126	THC2517493
KLHL18	0.0296349	0.418129	9.28685	9.9867	9.64774	9.68138	7.33163	9.998	11.0785	9.66104	10.2009	10.5606	11.3078	11.2944	9.30362	11.4716	kelch-like family member 18 [Source:HGNC Symbol;Acc:HGNC:29120] [ENST00000483201]	TGTGCGACGTGACCCTCAAGAGCTTTGCTGTTCCTTGATCATCAGTCCGAAAGGCGGTAT	chr3	47324565	47328749	+	FALSE	hs|3p21.31	ENST00000483201	23276	BC015962	kelch-like family member 18	NA	NA	NA
GRIK2	0.000110913	7.41238	5.25397	5.5597	5.83541	5.30812	5.03829	4.57367	0.567381	0.572575	4.48222	1.32303	1.50088	0.678804	3.19188	0.632563	Homo sapiens glutamate receptor, ionotropic, kainate 2 (GRIK2), transcript variant 2, mRNA [NM_175768]	CTTCTTCTGAGTGAATGTTAACATGCGCATTTTGTGGCTGATTTCAAATGCAGTCCAGTG	chr6	102516621	102516680	+	FALSE	hs|6q16.3	ENST00000369138	2898	NM_175768	glutamate receptor, ionotropic, kainate 2	GO:0030054|GO:0005886|GO:0005234|GO:0007268|GO:0032839|GO:0051402|GO:0006886|GO:0019228|GO:0030425|GO:0042803|GO:0046328|GO:0043524|GO:0043525|GO:0034220|GO:0045211|GO:0043195|GO:0048169|GO:0015277|GO:0006810|GO:0043204|GO:0001662|GO:0031625|GO:0031624|GO:0051967|GO:0060079|GO:0006874|GO:0035249|GO:0050804|GO:0014069|GO:0007215|GO:0030165|GO:0042734|GO:0035235|GO:0060080|GO:0032983|GO:0005887|GO:…	NM_175768	THC2661674
URB1	7.79e-05	0.46135	8.73201	8.70639	9.06088	8.75415	8.55615	8.99181	9.87447	9.82323	9.87764	9.92698	10.2362	8.93812	9.95987	10.383	Homo sapiens URB1 ribosome biogenesis 1 homolog (S. cerevisiae) (URB1), mRNA [NM_014825]	TTTTTATGAAAACGAAGAGAGATGTTTAAAGTTTATTTTTCAGCAGGTGAGGTGGCTCAC	chr21	33686776	33686835	-	FALSE	hs|21q22.11	ENST00000382751	9875	NM_014825	URB1 ribosome biogenesis 1 homolog (S. cerevisiae)	GO:0008150|GO:0005730	NM_014825	THC2491233
PDE4A	1.49e-05	3.50171	10.7916	10.4539	10.7457	10.767	10.8325	11.431	8.63096	8.24997	8.61619	9.43267	8.71518	9.81165	9.73293	8.31184	Homo sapiens phosphodiesterase 4A, cAMP-specific (PDE4A), transcript variant 4, mRNA [NM_006202]	TCCACTTTGACGATCAGTCATTCGGTCCGTTGATCAATAATCCTTCGATCTTGTCTCCAA	chr19	10580226	10580285	+	FALSE	hs|19p13.2	ENST00000380702	5141	NM_006202	phosphodiesterase 4A, cAMP-specific	GO:0005515|GO:0007608|GO:0048471|GO:0004115|GO:0010738|GO:0032587|GO:0035690|GO:0046872|GO:0005829|GO:0007165|GO:0030552|GO:0016020|GO:0043949|GO:0006198	NM_006202	THC2470913
PLA2G12A	0.000181622	4.38114	10.2459	10.7492	11.0162	10.9634	10.8386	10.9621	6.58112	7.52997	9.54587	8.68522	8.15953	9.68224	8.60687	8.48678	Homo sapiens phospholipase A2, group XIIA (PLA2G12A), mRNA [NM_030821]	GTTATACATTTAGGTTGTAAACCATATCTGGACAGCCAACGAGCCGCATGCAGGTGTCAT	chr4	110635557	110635616	-	FALSE	hs|4q25	ENST00000507961	81579	NM_030821	phospholipase A2, group XIIA	GO:0005794|GO:0005783|GO:0036149|GO:0005509|GO:0036148|GO:0005576|GO:0044281|GO:0016042|GO:0008150|GO:0036150|GO:0047498|GO:0006644|GO:0006654|GO:0036151|GO:0046474|GO:0036152	NM_030821	NP307130
RNF207	0.00630649	0.403596	8.97965	8.95209	9.38883	9.1251	9.30318	9.38865	11.0263	10.8994	10.634	10.703	8.66951	10.5631	10.8475	9.34472	Homo sapiens ring finger protein 207 (RNF207), mRNA [NM_207396]	ATCTGCTCCTCCTTCCTCAGCTTGGCCAACAAGGCTGAGCTCCTGGACCTGGGCTATGCT	chr1	6270442	6270930	+	FALSE	hs|1p36.31	ENST00000496676	388591	NM_207396	ring finger protein 207	GO:0005622|GO:0008270	NM_207396	THC2485751
H.sapiens mRNA for an acute myeloid leukaemia protein (1793bp). [X90978]	0.00305879	0.184547	7.9696	7.97999	8.34688	7.99487	8.30285	8.04248	10.9402	10.9803	10.7055	10.5036	7.71733	11.4133	10.6635	8.4527	CCCCTCCTCGGACAGCAGGAATTAGCTTCCCCAGGCATTTTCTGTATGTGAGTTGTATTG	chr21	36205780	36205838	-	FALSE	hs|21q22.12	NA	NA	X90978	NA	NA	NA	NA	NA
heat shock transcription factor, Y-linked 3, pseudogene [Source:HGNC Symbol;Acc:HGNC:37119] [ENST00000444242]	0.000295109	0.352944	5.21611	5.2648	5.55466	5.46533	5.32459	5.92268	7.25255	7.36291	7.20754	7.14159	5.49693	7.227	7.07823	6.21873	CCAGTCAGAAGCAGTTTTCCTCCTCCATCTTCAACTTCAGTTGGATCATCAGACCAAATT	chrY	2750071	2750130	-	FALSE	hs|Yp11.31	ENST00000444242	NA	NA	NA	NA	NA	NA	NA
LRRC37A4P	9.13e-10	5.77017	9.85732	9.39134	9.55523	9.71425	9.32908	9.54471	6.90174	7.00083	7.44332	7.24968	6.51565	6.97939	7.38543	6.64251	Homo sapiens leucine rich repeat containing 37, member A4, pseudogene (LRRC37A4P), non-coding RNA [NR_002940]	GTTATCAGTGCACTAAGTTACATTTGCCATATTTCTCAGCAGTAAACCTAGATGTGGAAT	chr17	43592513	43592572	-	FALSE	hs|17q21.31	ENST00000570311	55073	NR_002940	leucine rich repeat containing 37, member A4, pseudogene	NA	NR_002940	THC2541268
GFRA3	0.00506246	0.456052	7.41238	7.94319	7.21193	7.67299	7.51351	7.5719	8.74048	8.93616	8.68397	8.76076	6.83402	9.03349	8.51119	9.16148	Homo sapiens GDNF family receptor alpha 3 (GFRA3), mRNA [NM_001496]	CTTTCTGAGCCCTTCCTCTTGACTACCAGGATCACCAGAATCTAATAAGTTAGCCATTCT	chr5	137588336	137588395	-	FALSE	hs|5q31.2	ENST00000378362	2676	NM_001496	GDNF family receptor alpha 3	GO:0005886|GO:0005102|GO:0031225|GO:0048485|GO:0007399|GO:0043231|GO:0007165|GO:0005737|GO:0007411|GO:0007422|GO:0001764|GO:0008046|GO:0009897|GO:0019898	NM_001496	THC2473100
TMPRSS2	0.00935238	0.315922	7.96172	7.98333	8.05225	7.6597	7.91237	7.69945	10.321	9.85534	10.053	9.66615	7.44762	9.45583	9.71126	7.58898	Homo sapiens transmembrane protease, serine 2 (TMPRSS2), transcript variant 2, mRNA [NM_005656]	GAAGAAGAGAAAGATGTGTTTTGTTTTGGACTCTCTGTGGTCCCTTCCAATGCTGTGGGT	chr21	42836904	42836963	-	FALSE	hs|21q22.3	ENST00000398585	7113	NM_005656	transmembrane protease, serine 2	GO:0005515|GO:0016540|GO:0005886|GO:0004252|GO:0005887|GO:0006508|GO:0008236|GO:0046598|GO:0006898|GO:0070062|GO:0005044	NM_005656	THC2485211
THBS4	1.46e-05	37.4438	12.5411	14.961	14.5441	15.2667	12.9847	12.1112	10.0642	7.37113	7.12474	7.19339	7.44965	9.23572	10.6133	7.51037	Homo sapiens thrombospondin 4 (THBS4), mRNA [NM_003248]	ACCATCCCTGAGGACTTCCAAGAGTTTCAAACCCAGAATTTCGACCGCTTCGATAATTAA	chr5	79378905	79378964	+	FALSE	hs|5q14.1	ENST00000511888	7060	NM_003248	thrombospondin 4	GO:0005515|GO:0006986|GO:0034976|GO:0048771|GO:0005783|GO:0005509|GO:0071603|GO:0050731|GO:0005576|GO:0005615|GO:0005604|GO:0031012|GO:0005178|GO:0016529|GO:0034103|GO:0001938|GO:0016525|GO:0090023|GO:0051781|GO:0048266|GO:0008083|GO:0008201|GO:0070062|GO:0051451	NM_003248	THC2463496
MAK	0.000112864	3.92977	5.92499	4.56822	5.22672	5.79472	5.3821	5.92293	2.82208	2.90674	4.6003	2.29109	4.322	3.91199	2.44502	3.42179	Homo sapiens male germ cell-associated kinase (MAK), transcript variant 1, mRNA [NM_005906]	CTACTGAGTTCTGGAAGAAATATGCAAAAGTGGGTACTTGGAAGGGCAAAAATCATCCCC	chr6	10764538	10764597	-	FALSE	hs|6p24.2	ENST00000538030	4117	NM_005906	male germ cell-associated kinase	GO:0005515|GO:0072686|GO:0005813|GO:0006355|GO:0003713|GO:0030496|GO:0007275|GO:0005634|GO:0007283|GO:0045494|GO:0005524|GO:0030154|GO:0006351|GO:0001917|GO:0005737|GO:0046777|GO:0004672|GO:0051726|GO:0006468|GO:0001750|GO:0004693	NM_005906	THC2489588
FBLN1	0.0390068	2.4654	9.34376	9.29534	8.75872	6.949	9.65993	7.63092	7.20709	7.05216	6.93808	6.87845	6.5061	8.29937	8.98709	6.6846	Homo sapiens fibulin 1 (FBLN1), transcript variant C, mRNA [NM_001996]	GGCTCTCTGTGGATGGCAGGTCATGTGAAGACATCAATGAGTGCAGCAGCAGCCCCTGTA	chr22	45939377	45942994	+	FALSE	hs|22q13.31	ENST00000476366	2192	NM_001996	fibulin 1	GO:0007566|GO:0005509|GO:0005578|GO:0005576|GO:0005615|GO:0005604|GO:0016504|GO:0031012|GO:0010952|GO:0030198|GO:0016032|GO:0005201|GO:0070062	NM_001996	THC2500283
ALU1_HUMAN (P39188) Alu subfamily J sequence contamination warning entry, partial (8%) [THC2577459]	0.0260033	0.35588	4.7004	4.86478	4.87935	5.11065	4.8002	4.27537	6.42293	6.68918	6.38366	6.24627	4.6533	7.48519	5.81397	3.83125	AAACAAATTGAGTGGTGAGAATACAACAGAAGTCTGACTTAGACTGAGTGTTGTCAGCAT	chr9	5777413	5777472	+	FALSE	hs|9p24.1	NA	NA	NA	NA	NA	NA	THC2577459	NA
RYR1	0.0293401	0.198466	6.38704	7.43052	7.33853	8.1931	6.89013	7.5752	10.691	7.71624	9.91039	8.36701	6.08115	8.09967	11.2099	9.94563	Homo sapiens ryanodine receptor 1 (skeletal) (RYR1), transcript variant 1, mRNA [NM_000540]	GAGTCTTATGTCTGGAAGATGTACCAAGAGAGATGTTGGGATTTCTTCCCAGCTGGTGAT	chr19	39077965	39078024	+	FALSE	hs|19q13.2	ENST00000359596	6261	NM_000540	ryanodine receptor 1 (skeletal)	GO:0005515|GO:0005516|GO:0043931|GO:0005886|GO:0002020|GO:0014701|GO:0005737|GO:0034220|GO:0006936|GO:0031000|GO:0015278|GO:0006816|GO:0005938|GO:0070062|GO:0001666|GO:0005262|GO:0051209|GO:0005245|GO:0014802|GO:0051480|GO:0030314|GO:0071313|GO:0048741|GO:0030315|GO:0033017|GO:0014808|GO:0055085|GO:0003151|GO:0005790|GO:0016529|GO:0005887|GO:0070588|GO:0043588|GO:0005219|GO:0031674	NM_000540	THC2490181
FKBP4	0.000211155	0.473713	6.18141	6.90393	6.43272	7.10154	6.4266	6.22551	7.86455	7.79459	7.66077	8.039	7.61729	7.37075	6.92038	7.78344	Homo sapiens FK506 binding protein 4, 59kDa (FKBP4), mRNA [NM_002014]	CCACCAAATGCTGAGCTGAAATATGAATTACACCTCAAGAGTTTTGAAAAGGCCAAGGAG	chr12	2909056	2909213	+	FALSE	hs|12p13.33	ENST00000543037	2288	NM_002014	FK506 binding protein 4, 59kDa	GO:0051219|GO:0005515|GO:0000413|GO:0048471|GO:0046661|GO:0031503|GO:0035259|GO:0005829|GO:0034605|GO:0005739|GO:0005737|GO:0006457|GO:0031072|GO:0043025|GO:0030850|GO:0030674|GO:0070062|GO:0031115|GO:0032767|GO:0007566|GO:0031111|GO:0005874|GO:0048156|GO:0003755|GO:0005528|GO:0044295|GO:0005525|GO:0005524|GO:0061077|GO:0005789|GO:0010977|GO:0005654|GO:0006463|GO:0006825|GO:0030521|GO:1900034	NM_002014	THC2564663
C17orf67	0.00206841	0.364173	5.39275	6.10364	5.57465	6.15749	4.95648	5.56134	8.21762	7.03303	6.60463	7.17335	7.76917	5.85547	6.13222	6.8009	Homo sapiens chromosome 17 open reading frame 67 (C17orf67), mRNA [NM_001085430]	ACTGCTTCATTTTACTAACCTGCATAGATCACTAAAACCAATAGCTTAAAGCATAGACAC	chr17	54869505	54869564	-	FALSE	hs|17q22	ENST00000397861	339210	NM_001085430	chromosome 17 open reading frame 67	GO:0005576	NM_001085430	THC2621951
LCAT	0.000424155	0.460114	8.48026	8.72758	8.29117	7.59731	8.30471	8.5724	10.1741	9.45243	9.33602	9.47812	9.16227	8.59371	9.65031	9.595	Homo sapiens lecithin-cholesterol acyltransferase (LCAT), mRNA [NM_000229]	TGACTTCCAACGCTTCTTTGCAGACCTGCACTTTGAGGAAGGCTGGTACATGTGGCTGCA	chr16	67974171	67974230	-	FALSE	hs|16q22.1	ENST00000573538	3931	NM_000229	lecithin-cholesterol acyltransferase	GO:0042632|GO:0005515|GO:0043691|GO:0005576|GO:0044281|GO:0030301|GO:0005615|GO:0034372|GO:0004607|GO:0034364|GO:0034375|GO:0042157|GO:0034435|GO:0006644|GO:0034186|GO:0090107|GO:0070062|GO:0042158|GO:0006656|GO:0008203	NM_000229	THC2580621
AL533190 Homo sapiens ADULT BRAIN Homo sapiens cDNA clone CS0DN003YK17 3-PRIME, mRNA sequence [AL533190]	0.0162081	0.46291	4.67959	4.04825	5.13033	5.09106	4.67055	4.90045	5.42529	5.28461	5.53706	5.51055	5.29751	7.54673	5.33617	5.29399	CTGGGAAATCCATTTCATTAGTTAGAACTGAGCATTTTTCAAAGTATTCAACCAGCTCAA	chr13	45007795	45007854	+	FALSE	hs|13q14.11	NA	NA	AL533190	NA	NA	NA	NA	NA
NYX	0.0158735	0.441043	9.65846	9.57402	10.1679	9.88284	10.107	10.2609	11.4133	11.5793	11.325	11.2684	9.15904	11.5355	11.4497	9.91578	Homo sapiens nyctalopin (NYX), mRNA [NM_022567]	GAAGTCCTTTGTTTTCTACCACAATCCTCCTCCTCCTCTCCAGGGGCCTGGAAACACTAG	chrX	41334570	41334629	+	FALSE	hs|Xp11.4	ENST00000378220	60506	NM_022567	nyctalopin	GO:0005622|GO:0008150|GO:0003674|GO:0005578|GO:0007601|GO:0050896	NM_022567	THC2484608
C1orf145	0.00919358	2.49317	5.43999	5.02936	5.36567	4.62197	4.76946	5.14758	3.92945	3.59519	1.89004	4.29903	0.931948	1.99151	4.18859	5.11316	Homo sapiens chromosome 1 open reading frame 145 (C1orf145), transcript variant 1, long non-coding RNA [NR_073154]	CACGCTTTTGCGTTCATAAGGCCTTTTCATGTCAGTATCTTATTAGATATTCCCAAACAA	chr1	228392959	228393018	-	FALSE	hs|1q42.13	ENST00000337335	574407	NR_073154	chromosome 1 open reading frame 145	NA	NR_073154	THC2483367
Homo sapiens cDNA FLJ12004 fis, clone HEMBB1001564, moderately similar to VACUOLAR ATP SYNTHASE SUBUNIT H (EC 3.6.1.34). [AK022066]	0.00119901	0.263227	7.58774	7.46794	8.19951	6.75955	7.09042	8.16882	9.83298	9.82996	10.2011	9.71513	7.78948	10.1156	9.37332	7.80274	GAGCTGTCTCAACAGAATTACACCTTACTGTATTTTCAGGATGAATTTATTATTTCTGCC	chr3	41900351	41900410	-	FALSE	hs|3p22.1	NA	NA	AK022066	NA	NA	NA	THC2527831	NA
ROBO2	0.00119683	0.315877	5.41617	6.42199	5.99934	5.95536	5.8607	6.54468	7.90802	8.11966	8.29898	7.75367	8.5266	6.98419	6.1978	6.57863	Homo sapiens roundabout, axon guidance receptor, homolog 2 (Drosophila) (ROBO2), transcript variant 2, mRNA [NM_002942]	GCCCATTTTCTACTGACAGTAACACCAGTGCAGCCCTGAGTCAAAGTCAGAGGCCTCGGC	chr3	77684060	77684119	+	FALSE	hs|3p12.3	ENST00000473767	6092	NM_002942	roundabout, axon guidance receptor, homolog 2 (Drosophila)	GO:0031290|GO:0001656|GO:0005515|GO:0001657|GO:0021891|GO:0051964|GO:0009986|GO:0061364|GO:0007417|GO:0032870|GO:0042802|GO:0050925|GO:0007411|GO:0007420|GO:0016199|GO:0050772|GO:0016021|GO:0030673|GO:0007156|GO:0008046|GO:0070062	NM_002942	THC2631651
TRMT61A	0.00115147	0.374119	7.60325	7.46078	7.9184	8.05578	7.46196	7.65386	9.25119	9.40363	9.18929	9.0922	7.85144	10.0526	8.99741	8.00645	Homo sapiens tRNA methyltransferase 61A (TRMT61A), mRNA [NM_152307]	GCGCTTCTGCTCCTTCTCACCGTGCATCGAGCAGGTGCAACGCACATGCCAGGCGCTGGC	chr14	104000891	104000950	+	FALSE	hs|14q32.33	ENST00000389749	115708	NM_152307	tRNA methyltransferase 61A	GO:0031515|GO:0016429|GO:0030488|GO:0005634	NM_152307	THC2476209
FBXO32	0.0106399	0.266618	12.0272	11.1304	11.9296	10.7235	11.63	9.87723	14.2347	12.4087	11.8269	12.065	11.2493	12.6507	14.1954	14.3122	Homo sapiens F-box protein 32 (FBXO32), transcript variant 1, mRNA [NM_058229]	GAGAGTAAACCCTTGCATTTGGGACAAGGAGAATATGTGAAGTTCAGGAGTGCTCACACT	chr8	124512405	124512464	-	FALSE	hs|8q24.13	ENST00000517956	114907	NM_058229	F-box protein 32	GO:0005515|GO:0030018|GO:0016567|GO:0005730|GO:0014894|GO:0071549	NM_058229	THC2491972
CCGACCGTCATCCCGTGTGTATACAGTAGTCCCCCCTTATCCTCATCTGGTGCGTATACA	0.00712557	0.324953	9.05577	9.17072	9.65169	9.07833	9.43828	9.24714	11.3525	11.2358	10.9235	10.911	8.72931	11.6975	11.0562	9.31627	NA	NA	NA	NA	FALSE	NA	NA	NA	NA	NA	NA	NA	NA	NA	NA
VWA3B	0.00342483	0.313426	2.40727	3.1004	3.90043	3.12718	3.39264	3.5017	4.88846	3.45636	3.31122	5.15484	5.07359	4.46376	5.10866	6.25208	Homo sapiens von Willebrand factor A domain containing 3B (VWA3B), mRNA [NM_144992]	AATTGGCCCATTTCACTGAAAGAGCTGTCGATGCTGGAAAGTGAAATCCTAGCTGGGAAA	chr2	98887215	98887274	+	FALSE	hs|2q11.2	ENST00000490947	200403	NM_144992	von Willebrand factor A domain containing 3B	NA	NM_144992	NP498462
LTB4R2	0.00239436	0.370177	7.95219	8.02515	8.11864	7.94894	7.95603	8.09537	9.59822	9.74859	9.45502	9.30662	7.75028	10.3896	9.36553	8.69375	Homo sapiens leukotriene B4 receptor 2 (LTB4R2), transcript variant 1, mRNA [NM_019839]	CTTGCTCTGGGCCCCCTACCACGCAGTCAACCTTCTGCAGGCGGTCGCAGCGCTGGCTCC	chr14	24780572	24780631	+	FALSE	hs|14q12	ENST00000530080	56413	NM_019839	leukotriene B4 receptor 2	GO:0051546|GO:0016020|GO:0007186|GO:0006935|GO:0005886|GO:0005887|GO:0001632|GO:0007194|GO:0004974	NM_019839	THC2550379
KCNH3	0.000844165	2.12646	9.77316	9.71294	10.0609	9.5143	9.53203	10.0791	8.9582	8.68196	9.05289	8.86992	7.46078	8.92979	9.12649	7.75348	Homo sapiens potassium channel, voltage gated eag related subfamily H, member 3 (KCNH3), mRNA [NM_012284]	ACCCCCACAGCCTGGAGATGGTGCTTATTGGCTGCCATGGCTCTGGCACAGTCCAGTGGA	chr12	49951651	49951710	+	FALSE	hs|12q13.12	ENST00000257981	23416	NM_012284	potassium channel, voltage gated eag related subfamily H, member 3	GO:0005515|GO:0023014|GO:0005886|GO:0007268|GO:0000155|GO:0000160|GO:0005887|GO:0005249|GO:0042391|GO:0034765|GO:0016021|GO:0006813|GO:0071805	NM_012284	THC2475111
TIMM21	0.00107152	0.352491	5.16396	5.49044	4.70247	5.77458	5.28325	5.40354	7.31786	7.34317	7.58997	7.171	5.87083	6.08165	6.38366	5.64921	Homo sapiens translocase of inner mitochondrial membrane 21 homolog (yeast) (TIMM21), mRNA [NM_014177]	TATTCATTTTATATTATAGAACTGCATAATGTCTGCAGAATAAAATTAAAACTAACAAAT	chr18	71826028	71826087	+	FALSE	hs|18q22.3	ENST00000169551	29090	NM_014177	translocase of inner mitochondrial membrane 21 homolog (yeast)	GO:0033617|GO:0005744|GO:0005515|GO:0032981|GO:0003674|GO:0006626|GO:0016021|GO:0030150|GO:0044267	NM_014177	THC2525543
ACATTCATAGGGTGACATGCAATGAGGTCTACTTGGGTTTTAATTTGTATCAGCACTCAT	1.45e-05	3.46371	8.55485	8.48786	7.51135	8.40713	8.18677	7.92983	6.2986	5.58288	6.0298	5.94048	6.43318	6.11533	7.61851	6.39663	chr4	57801308	57801367	-	FALSE	hs|4q12	NA	NA	NA	NA	NA	NA	NA	NA	NA
CTAGE10P	0.000408059	0.417977	5.36413	5.75173	5.75488	5.66196	5.39417	5.63812	6.80384	6.93365	7.47414	7.19812	6.30321	5.81548	7.26094	6.37103	Homo sapiens CTAGE family, member 10, pseudogene (CTAGE10P), non-coding RNA [NR_003268]	AAATGGATGGGTCAGTGCATTCAGAAATGGAATTCAGTGGAAATGATACCAAAGATAATC	chr13	50466672	50466731	+	FALSE	hs|13q14.2	ENST00000318353	220429	NR_003268	CTAGE family, member 10, pseudogene	NA	NR_003268	THC2614674
ACBD7	0.00937695	0.322303	8.4768	7.88898	8.37768	8.34864	8.45824	8.05683	10.2685	10.0066	9.65464	9.58937	7.71646	11.2559	9.75624	8.55595	Homo sapiens acyl-CoA binding domain containing 7 (ACBD7), mRNA [NM_001039844]	GCTAATTTTTGTATTTTTAGTAGAGATGGGGTTTTGTCAAGTTGGCCAGGCTGGTCTCGA	chr10	15118665	15118724	+	FALSE	hs|10p13	ENST00000448477	414149	NM_001039844	acyl-CoA binding domain containing 7	GO:0000062|GO:0008289	NM_001039844	NP838744
Homo sapiens cDNA: FLJ22776 fis, clone KAIA1582. [AK026429]	0.000775617	0.426143	2.65622	2.55189	2.65212	2.93637	1.6633	3.07906	3.94471	3.95155	3.38117	3.89151	3.8064	4.7707	3.43869	3.2897	TGGGGGTACTTTCTTTTACTCAAGGACTTCAACTTCATCAGGGTTTCTCGAGAATCTAAG	chr2	236655897	236655956	-	FALSE	hs|2q37.2	NA	NA	AK026429	NA	NA	NA	THC2616081	NA
Q9BVD9_HUMAN (Q9BVD9) FTO protein, partial (16%) [THC2703681]	7.58e-05	0.344341	4.2961	5.31313	4.11937	4.7332	5.18059	4.63963	7.03001	6.52741	6.08922	6.22845	5.74827	6.05424	5.9551	6.47583	CTTGGTACTCCACTTAAAACATGTAAATAACCCGAAACTGTTACTCCAAGTATAATGTGA	chr1	231152731	231152790	-	FALSE	hs|1q42.2	NA	NA	NA	NA	NA	NA	THC2703681	NA
TGAGAATTTGTCCTAATGCCTCTGGTCTTTGCCTGTGCTTCAGCTTATTTGGGGGAACAA	0.000391444	0.399233	6.70708	7.24397	7.61013	6.39842	6.52298	6.75765	8.73933	8.35415	8.51139	8.48253	7.22573	8.30892	8.39224	7.47547	chr12	128672674	128672733	-	FALSE	hs|12q24.32	ENST00000615029	NA	NA	NA	NA	NA	THC2749949	NA	NA
PTGDR2	0.00177525	0.0859391	2.8562	3.57186	3.87084	3.25188	3.35037	3.60308	5.27847	5.93742	3.80715	6.44986	4.75263	8.87076	6.48266	7.86019	Homo sapiens prostaglandin D2 receptor 2 (PTGDR2), mRNA [NM_004778]	TGGATGAAATGTCAGTGGAAGAAGCAGATGAGAAACTCTTGAGATCTTGGTCCTGTGTTT	chr11	60618728	60618787	-	FALSE	hs|11q12.2	ENST00000332539	11251	NM_004778	prostaglandin D2 receptor 2	GO:0043005|GO:0045745|GO:0019722|GO:0005886|GO:0004930|GO:0007268|GO:0004956|GO:0007193|GO:0004958|GO:0006955|GO:0042923|GO:0006935|GO:0007186|GO:0005887|GO:0007187|GO:0007218|GO:0001785	NM_004778	THC2473155
MYL3	2.29e-05	0.489188	9.19249	8.90279	9.29034	9.42469	9.00556	9.23763	10.5324	10.4387	10.4166	10.0926	9.4848	10.4316	9.98336	10.0872	Homo sapiens myosin, light chain 3, alkali; ventricular, skeletal, slow (MYL3), mRNA [NM_000258]	CTCAATACCAAGATGATGGACTTTGAAACTTTCCTGCCTATGCTCCAGCACATTTCCAAG	chr3	46901077	46901136	-	FALSE	hs|3p21.31	ENST00000292327	4634	NM_000258	myosin, light chain 3, alkali; ventricular, skeletal, slow	GO:0030049|GO:0055010|GO:0005509|GO:0006942|GO:0032781|GO:0060048|GO:0030017|GO:0005829|GO:0003785|GO:0003774|GO:0002026|GO:0007519|GO:0008152|GO:0032038|GO:0005859|GO:0008307|GO:0031672|GO:0031674	NM_000258	THC2468026
RPP25	2.61e-06	0.292659	8.11293	8.52813	7.79109	8.11024	7.98756	7.61179	9.8312	9.39628	9.47607	9.94405	10.4694	9.30382	9.30147	10.3397	Homo sapiens ribonuclease P/MRP 25kDa subunit (RPP25), mRNA [NM_017793]	TGGGGGAGAATGGTGGACAGTGGGATTCTGGAAACTTGTTTGGGACCCCCAAGGGTTAAA	chr15	75247989	75248048	-	FALSE	hs|15q24.2	ENST00000322177	54913	NM_017793	ribonuclease P/MRP 25kDa subunit	GO:0005515|GO:0005815|GO:0004526|GO:0005654|GO:0008033	NM_017793	THC2476402
calponin 3, acidic pseudogene 1 [Source:HGNC Symbol;Acc:HGNC:38666] [ENST00000401596]	0.00322804	2.53281	8.67857	7.92228	8.7771	7.95782	9.19677	7.92148	7.19385	5.50126	5.69353	6.73374	6.55373	8.54673	7.74886	6.76658	GCAGGTATGTCAGCTTACGGGACTAGGCATCTTTATGATCCCAACATGCAAACTGACAAA	chr6	6535418	6535479	+	FALSE	hs|6p25.1	ENST00000401596	NA	NA	NA	NA	NA	NA	NA
GPRIN3	0.000699776	0.390556	7.25323	6.42567	7.79357	7.02378	7.80256	7.76778	9.41376	8.55996	7.89838	8.81512	8.89797	8.33033	8.61299	9.1881	GPRIN family member 3 [Source:HGNC Symbol;Acc:HGNC:27733] [ENST00000609438]	TGGACATGTATCAGTGTGTTGATTTGCACAAACCAATAAAAGCCCTACATTTTTTGGAAA	chr4	90161630	90161689	-	FALSE	hs|4q22.1	ENST00000609438	285513	NA	GPRIN family member 3	NA	NA	THC2716965
PAX9	0.00222162	0.361806	6.307	6.68367	6.90565	5.99081	6.62275	6.19548	8.09825	7.90969	8.07477	7.85773	6.26012	8.9408	8.10437	6.91547	Homo sapiens paired box 9 (PAX9), mRNA [NM_006194]	CACCTCATTGTCTCCCCACAACTGTGACATTCCGGCATCGCTGGCGTTCAAGGGAATGCA	chr14	37145552	37145611	+	FALSE	hs|14q13.3	ENST00000402703	5083	NM_006194	paired box 9	GO:0005515|GO:0000977|GO:0071363|GO:0060325|GO:0007492|GO:0045944|GO:0042481|GO:0042476|GO:0005634|GO:0001228|GO:0045892|GO:0006351	NM_006194	THC2472287
STMN2	0.00156079	4.22775	11.6853	11.9085	11.4543	11.501	11.0207	10.7768	3.26889	2.81702	5.3189	4.90902	5.73414	12.1931	8.50713	6.17567	Homo sapiens stathmin 2 (STMN2), transcript variant 2, mRNA [NM_007029]	TATAATGGATCATGCGATATCAGGATGGGGAATGTATGACATGGTTTAAAAAGAACTCAT	chr8	80577162	80577221	+	FALSE	hs|8q21.13	ENST00000220876	11075	NM_007029	stathmin 2	GO:0005515|GO:0043005|GO:0030424|GO:0031115|GO:0048471|GO:0031117|GO:0005794|GO:0031982|GO:0030027|GO:0030426|GO:0005737|GO:0015631|GO:0016020|GO:0010976|GO:0043025|GO:0007026|GO:0010977|GO:0048306|GO:0005768	NM_007029	THC2469328
Homo sapiens proliferation-inducing protein 9 mRNA, complete cds. [AY239294]	0.0236277	0.4692	7.63323	7.53983	7.86086	7.63262	7.61179	7.56196	8.71794	8.54257	8.22924	8.09436	7.51286	10.2825	8.53772	7.9261	ATCGTATCTGTCATTGTAATTGGTCCTGATAGCTTCCACCAGCTTAGCCAAAGCGCCTTT	chr9	136217864	136217923	-	FALSE	hs|9q34.2	NA	NA	AY239294	NA	NA	NA	THC2476915	NA
RTP4	0.00455923	0.289001	9.53975	9.34873	8.47119	8.92979	9.0496	8.21762	11.1912	10.8826	8.2722	10.842	10.8542	11.9127	9.99726	10.0332	Homo sapiens receptor (chemosensory) transporter protein 4 (RTP4), mRNA [NM_022147]	CAAGCAGGATCAAGTTTGTAGAATAAACACTGGTTTCCTAGCCATCCTCTGAAAACAGTA	chr3	187089255	187089314	+	FALSE	hs|3q27.3	ENST00000259030	64108	NM_022147	receptor (chemosensory) transporter protein 4	GO:0005515|GO:0005737|GO:0006612|GO:0016021|GO:0001580	NM_022147	THC2607382
ACSL6	0.00514735	0.308218	3.23348	4.67553	4.62046	6.02332	5.04763	5.3588	6.5484	7.17692	6.25833	7.21808	7.47087	4.97017	5.69747	7.07932	Homo sapiens acyl-CoA synthetase long-chain family member 6 (ACSL6), transcript variant 2, mRNA [NM_001009185]	GCATAATTACATTCCTAAAATCTTTAAGCGTGCCGAAGTTTAACCACTAAAACCTCCTTT	chr5	131288437	131288496	-	FALSE	hs|5q31.1	ENST00000357096	23305	NM_001009185	acyl-CoA synthetase long-chain family member 6	GO:0001676|GO:0005886|GO:0005741|GO:0005634|GO:0044281|GO:0035338|GO:0042803|GO:0007405|GO:0048666|GO:0019432|GO:0044255|GO:0005778|GO:0006637|GO:0001666|GO:0032869|GO:0010867|GO:0007584|GO:0010747|GO:0008654|GO:0048545|GO:0005524|GO:0004467|GO:0009629|GO:0016020|GO:0010976|GO:0005789|GO:0015908|GO:0016021|GO:0019899	NM_001009185	THC2514052
TAACCAAGGTAATGTTCAGTTTCAGCATGCTAAAAAGACTCCACTTAACATTTATCTCAG	6.59e-06	0.196508	5.94777	6.15568	6.72232	6.54996	6.72524	7.40876	9.57242	9.53975	8.74065	9.20585	7.84039	8.29744	9.34745	8.66684	NA	NA	NA	NA	FALSE	NA	NA	NA	NA	NA	NA	NA	NA	NA	NA
KAT2A	5.17e-05	2.14055	12.5293	12.7636	12.8366	12.9144	12.4691	12.4951	11.0541	11.1047	11.5128	11.3263	12.2472	11.3426	11.4827	12.0928	Homo sapiens K(lysine) acetyltransferase 2A (KAT2A), mRNA [NM_021078]	CTTGAGTGATGGCTTCAGGGGTTGGAAGTTCAGCCCAAACTGAAGGGGGCCATGCCTTGT	chr17	40265235	40265294	-	FALSE	hs|17q21.2	ENST00000465682	2648	NM_021078	K(lysine) acetyltransferase 2A	GO:0005515|GO:0072686|GO:0042826|GO:0006366|GO:0008283|GO:0001756|GO:0035948|GO:0006325|GO:0005615|GO:0021537|GO:0031647|GO:0035264|GO:0043997|GO:0016032|GO:0044154|GO:0006338|GO:0004402|GO:0016578|GO:0006357|GO:0030914|GO:0010484|GO:0003713|GO:0001843|GO:0001701|GO:0033276|GO:0022037|GO:0043983|GO:0043966|GO:0003682|GO:0005671|GO:0005654|GO:0030901	NM_021078	THC2466442
SLC35F6	0.0311512	0.210015	7.32511	8.56393	9.55947	9.55761	9.57307	10.0686	11.4665	13.1186	12.0445	11.0562	8.31555	10.1086	12.2013	8.78023	Homo sapiens solute carrier family 35, member F6 (SLC35F6), mRNA [NM_017877]	CTGCAGAACCCCCAGGGCAGCTGCTGCCACAGAAGATAACAACACCCAAGTCCTCTTTTT	chr2	27001493	27001552	+	FALSE	hs|2p23.3	ENST00000429494	54978	NM_017877	solute carrier family 35, member F6	GO:0005739|GO:0005515|GO:0008284|GO:0006810|GO:0016021|GO:0005765|GO:0070062	NM_017877	NP1160722
IL31RA	0.000661609	0.283554	4.52164	4.66954	4.39883	4.67321	4.39709	4.94037	6.85073	6.93205	6.65524	6.72049	4.66761	6.75588	6.23014	5.24625	Homo sapiens interleukin 31 receptor A (IL31RA), transcript variant 1, mRNA [NM_139017]	CGTTCCCAACCCTGCTGAAAGTAGTATAGCCACATGGCATGGAGATGATTTCAAGGATAA	chr5	55210702	55212476	+	FALSE	hs|5q11.2	ENST00000490985	133396	NM_139017	interleukin 31 receptor A	GO:0043066|GO:0008284|GO:0004896|GO:0005886|GO:0019901|GO:0043031|GO:0042517|GO:0003713|GO:0019221|GO:0042523|GO:0042592|GO:0006952|GO:0007259|GO:0019955|GO:0000165|GO:0030225|GO:0030224|GO:0016021|GO:0045893|GO:0007169	NM_139017	NP1075712
CTATCAAGATGCATGAAAAGAGAAACACCAAACACAAGAATAATGAAAAGACTCCACGGG	0.00120867	0.0474688	5.59424	4.14881	4.39946	5.01475	4.11029	4.60836	9.16337	10.0037	9.81807	9.14699	4.65237	9.55698	9.31271	5.40716	chrX	100165888	100165947	+	FALSE	hs|Xq22.1	ENST00000447373	NA	NA	NA	NA	NA	NA	NA	NA
EGFL8	0.000588173	0.475568	7.95197	8.0483	7.9763	8.0727	7.88184	8.06549	9.41585	9.43939	9.1247	9.12104	8.07167	9.43036	8.95438	8.50073	Homo sapiens EGF-like-domain, multiple 8 (EGFL8), transcript variant 1, mRNA [NM_030652]	TCCAGGGCTGAGCTGTGCACTCTCTTAGGCGGATTCTCCTTCCTCCTGCTACTGATACCA	chr6	32133949	32134008	+	FALSE	hs|6p21.32	ENST00000429696	80864	NM_030652	EGF-like-domain, multiple 8	GO:0005509|GO:0005576|GO:0001701	NM_030652	THC2527153
ADAM33	0.0112452	0.40793	8.47966	8.40031	8.61029	8.00069	8.3644	8.14874	10.3189	9.29435	9.20868	10.3941	7.81546	9.49931	10.2421	8.59891	Homo sapiens ADAM metallopeptidase domain 33 (ADAM33), transcript variant 1, mRNA [NM_025220]	GGCCTCTGCAAACAAACATAATTTTGGGGACCTTCCTTCCTGTTTCTTCCCACCCTGTCT	chr20	3649092	3649151	-	FALSE	hs|20p13	ENST00000350009	80332	NM_025220	ADAM metallopeptidase domain 33	GO:0006508|GO:0008270|GO:0016021|GO:0004222	NM_025220	NP1168293
MOGAT3	0.00354377	0.488028	5.75982	6.58422	6.38593	6.34448	5.94954	6.6846	7.09751	7.61053	7.358	7.04154	6.55509	8.40258	7.31706	6.49958	Homo sapiens monoacylglycerol O-acyltransferase 3 (MOGAT3), transcript variant 1, mRNA [NM_178176]	GATTATTATCCTGTCAAGCTGGTGAAAACAGCAGAGCTGCCCCCGGATCGGAACTACGTG	chr7	100842070	100843532	-	FALSE	hs|7q22.1	ENST00000379423	346606	NM_178176	monoacylglycerol O-acyltransferase 3	GO:0019432|GO:0005789|GO:0003846|GO:0004144|GO:0016021|GO:0006071	NM_178176	NP1465639
ribosomal protein S23 pseudogene 2 [Source:HGNC Symbol;Acc:HGNC:36568] [ENST00000463671]	0.0043907	0.361575	13.3206	13.1439	13.2253	13.815	12.7804	13.2048	14.7115	15.4212	15.1566	14.9404	12.7333	14.9289	14.9304	13.6012	AGAATGGTAAGAAAATCAGAGCCTTTGTACCCAATGATGGTGAGGAAAACGATGAAGCTC	chr4	138369465	138369524	+	FALSE	hs|4q28.3	ENST00000463671	NA	NA	NA	NA	NA	NA	NA
CAMK1G	4.55e-05	0.302376	8.1326	8.74784	8.92919	8.55507	8.66145	9.074	10.6151	10.4225	9.86085	9.40019	10.0922	9.97124	11.0272	11.2134	Homo sapiens calcium/calmodulin-dependent protein kinase IG (CAMK1G), mRNA [NM_020439]	AGTTAACCTTGGAAGTTGACTATTTTAATGTCTGCCAGGAGTTCTAATCCTGCCTCTGTT	chr1	209787105	209787164	+	FALSE	hs|1q32.2	ENST00000009105	57172	NM_020439	calcium/calmodulin-dependent protein kinase IG	GO:0043005|GO:0005516|GO:0005886|GO:0000139|GO:0006468|GO:0004683|GO:0005524|GO:0005954	NM_020439	THC2463322
zinc finger protein 720 pseudogene 1 [Source:HGNC Symbol;Acc:HGNC:34505] [ENST00000562403]	0.00336094	0.241738	6.77399	6.69297	7.15338	7.58436	6.6872	7.45863	9.55722	9.94017	9.69306	9.68099	6.75369	8.70488	8.91609	7.35737	TTACTCGACATCGAAGTAGTCATACCGGAGAGAAACCCTACAAACGTAAGGAATGCAGCA	chr16	31613215	31613274	-	FALSE	hs|16p11.2	ENST00000562403	NA	NA	NA	NA	NA	NA	NA
CCTGTTCTGTGGCATTCTGGACCCCATAGAGAAATCCATGATGTCAAACTAGACAAACCA	2.56e-05	0.225605	7.09751	7.83827	7.15802	7.94025	7.11805	7.32536	9.46424	9.83855	10.1989	9.7836	8.09967	9.98649	9.73923	8.65927	chr7	84658067	84658130	+	FALSE	hs|7q21.11	NA	NA	NA	NA	NA	NA	NA	NA	NA
RGN	0.00891169	2.84955	10.3219	10.6272	9.91146	10.3393	9.99274	9.65169	5.34447	3.42925	10.9038	9.38541	5.39638	8.08338	7.76374	6.35823	Homo sapiens regucalcin (RGN), transcript variant 2, mRNA [NM_152869]	TAAGGCTTTCTGTAAAAGGTACTATAGAAGGGCGAAGAATCGTTCAACTGTCAATCAGCC	chrX	46952536	46952595	+	FALSE	hs|Xp11.23	ENST00000475448	9104	NM_152869	regucalcin	GO:0050848|GO:0005737|GO:0004341|GO:0019853|GO:0005509|GO:0006874|GO:0030234|GO:0008270|GO:0005654|GO:0005634|GO:0032781	NM_152869	NP704201
SEZ6L	0.0352023	2.51691	8.8588	8.83116	8.86512	9.58026	8.3286	6.3504	5.45632	7.46919	7.23747	6.38821	6.53583	6.39968	8.00576	8.8558	Homo sapiens seizure related 6 homolog (mouse)-like (SEZ6L), transcript variant 1, mRNA [NM_021115]	CTCATCATCTCCTTACTGCTGGGAGGAGCCTACATTTACATCACAAGATGTCGCTACTAT	chr22	26771609	26773651	+	FALSE	hs|22q12.1	ENST00000494013	23544	NM_021115	seizure related 6 homolog (mouse)-like	GO:0008344|GO:0090036|GO:0021680|GO:0043025|GO:0005789|GO:0016021|GO:0060074	NM_021115	THC2476471
ribosomal protein L6 pseudogene 2 [Source:HGNC Symbol;Acc:HGNC:35964] [ENST00000425480]	0.00814985	0.296804	11.1506	11.215	11.4227	11.6768	11.2398	11.4968	13.0475	14.0709	13.5513	13.2482	10.5324	13.197	13.3053	11.7192	AGAACACACCAGAAATTTGTCATTACCTCAACCAGAATTGATATCAGCAATGTAAAAACC	chr1	119761937	119761972	-	FALSE	hs|1p12	ENST00000425480	NA	NA	NA	NA	NA	NA	NA
TTACTCAAGGGGTGTGTATGTGTGTGTCTGAACCAAGAAAGGTTGAGAGCTCCAGGTATT	0.00337491	0.250272	6.59472	6.58836	6.56947	6.80814	6.79249	6.9206	9.20109	9.29597	8.9509	9.14169	6.39158	8.66928	8.90498	6.8977	chr22	40729499	40729558	-	FALSE	hs|22q13.1	NA	NA	NA	NA	NA	NA	THC2521437	NA	NA
LINC00167	0.0024697	0.377354	5.51838	5.68789	5.82899	5.95343	5.72843	6.22988	7.28374	7.27073	6.73937	6.79249	6.24986	8.6737	6.97258	6.29371	Homo sapiens long intergenic non-protein coding RNA 167 (LINC00167), long non-coding RNA [NR_024233]	AACCGAACTCCCGCCCGGCTCCCGGAGTCGGGAGCCTGCCGGGGTCTCGCCCTCAGGACC	chr11	129873298	129873357	+	FALSE	hs|11q24.3	ENST00000530583	440072	NR_024233	long intergenic non-protein coding RNA 167	NA	NR_024233	THC2485835
CNNM1	2.69e-05	0.210358	6.33752	6.79295	6.41225	5.97868	6.42849	6.41425	8.80554	8.91814	8.55362	9.07602	8.97768	6.96266	7.97571	9.00632	Homo sapiens cyclin and CBS domain divalent metal cation transport mediator 1 (CNNM1), mRNA [NM_020348]	GCCACAGCGTGTGGAAGTAAAGACTTTGGAGCTAGAGATGCCTTTTCCAGCAATGATTAT	chr10	101153552	101153611	+	FALSE	hs|10q24.2	ENST00000356713	26507	NM_020348	cyclin and CBS domain divalent metal cation transport mediator 1	GO:0005886|GO:0016021|GO:0006811	NM_020348	THC2561631
AATTATCATTTTTCTTCCTTTCTTTCCTCACTATCTGTACTTGGCATATTTCCTACAGTG	0.0017644	0.301992	8.62084	8.50187	8.68462	8.1231	8.14218	8.36668	10.182	10.1674	10.5977	10.9078	8.21762	10.3703	10.2549	8.86179	chr2	204163910	204163969	-	FALSE	hs|2q33.2	NA	NA	NA	NA	NA	NA	THC2548869	NA	NA
BX099788 Soares fetal liver spleen 1NFLS Homo sapiens cDNA clone IMAGp998I23604, mRNA sequence [BX099788]	0.000383127	0.282487	5.49781	5.58371	5.9859	5.58501	5.78304	5.91214	7.61159	7.64321	7.74156	7.71969	5.83725	8.42838	7.52122	6.69781	CATACCCCAAGCAGTCCTTCCCTGTACAGTTTCACTTTATTAAAAGGATTATAATTAGGG	chr17	9366100	9366159	-	FALSE	hs|17p13.1	NA	NA	BX099788	NA	NA	NA	THC2681965	NA
Homo sapiens cDNA clone IMAGE:3351130, complete cds. [BC007606]	0.00030032	0.359304	6.63998	6.63242	6.42989	6.44286	6.93205	6.56377	8.52717	8.32396	8.02658	8.24103	6.54353	8.31347	8.28693	7.70586	TCATCCACCTGAAGTTCACCCCGTTTCCCCAATGACTTAGAATGGCTTTGTGCTTAGTTT	chr17	76220286	76220345	-	FALSE	hs|17q25.3	NA	NA	BC007606	NA	NA	NA	NA	NA
OR7C2	0.00590163	0.475742	6.66654	7.02578	6.81073	7.13409	6.7278	6.91215	8.15225	8.14993	8.23749	8.02658	6.5527	8.75676	7.58455	7.16329	Homo sapiens olfactory receptor, family 7, subfamily C, member 2 (OR7C2), mRNA [NM_012377]	CAATAACATCGTGATGTATTTTGTGACCATTGTCCTGGGTGTTTTTCCTCTCTGTGGAAT	chr19	15052882	15052941	+	FALSE	hs|19p13.12	ENST00000248072	26658	NM_012377	olfactory receptor, family 7, subfamily C, member 2	GO:0050911|GO:0004984|GO:0007186|GO:0005886|GO:0004930|GO:0016021	NM_012377	NP384510
Q9XDH2_MYCTU (Q9XDH2) Proline-rich mucin homolog, partial (3%) [THC2520542]	3.46e-05	3.9439	8.1289	8.57939	7.1302	8.22549	7.75265	7.70925	5.73517	5.60394	4.42111	6.28315	6.59964	6.17179	6.40779	5.9303	GCGAACTGGTACAGCGTGTATCCCATTTAGTAATCCATTATCGAGGGGATCTCTCCGGGC	chr5	115909920	115909979	+	FALSE	hs|5q23.1	NA	NA	NA	NA	NA	NA	THC2520542	NA
LOC102725415	0.00257076	0.29961	7.98245	7.78444	8.00069	7.72125	7.64384	7.81071	9.98227	10.2657	9.53501	9.41643	7.7121	10.2625	9.43204	8.12015	Homo sapiens cDNA FLJ14309 fis, clone PLACE3000221. [AK024371]	TCCCACAGCTCACTTCCCTCTCTACTGAATCTGCTGAAGATCATGCAGCTGCTGTTCCTG	chr7	65994186	65994245	-	FALSE	hs|7q11.21	ENST00000449307	102725415	NA	uncharacterized LOC102725415	NA	NA	THC2492286
Q4SPR8_TETNG (Q4SPR8) Chromosome 16 SCAF14537, whole genome shotgun sequence. (Fragment), partial (16%) [THC2655508]	0.0253187	0.27075	8.99133	8.81138	8.06113	9.36654	7.52783	8.33175	10.6288	11.2219	9.65932	9.86864	7.11849	11.6656	11.0486	9.12649	ATGGTTGCTGCTGCTTCTCAGTCTAAAGCTGACTAGCACATAGTCCCTCCTCTTTTTGTA	chr3	50051142	50051201	-	FALSE	hs|3p21.31	NA	NA	NA	NA	NA	NA	THC2655508	NA
CENPN	0.00334391	0.484353	5.3616	5.8112	5.91044	6.2964	5.78237	5.24466	6.89483	7.29907	7.52034	6.45852	7.26386	6.15726	6.13076	5.96396	Homo sapiens centromere protein N (CENPN), transcript variant 3, mRNA [NM_018455]	CCGTGCCAAAGAGATGGATGAGACTGTTGCTGAGTTCATCAAGAGGACCATCTTGAAAAT	chr16	81040880	81045591	+	FALSE	hs|16q23.2	ENST00000568445	55839	NM_018455	centromere protein N	GO:0034080|GO:0007067|GO:0007059|GO:0006334|GO:0000777|GO:0005654|GO:0005634|GO:0000278|GO:0005829	NM_018455	THC2471285
AP1G2	2.08e-05	2.46205	11.0841	10.7064	11.1772	10.9567	10.8367	11.2849	9.02099	9.42223	9.79111	9.63025	9.98358	9.10463	9.92151	10.3834	Homo sapiens adaptor-related protein complex 1, gamma 2 subunit (AP1G2), transcript variant 1, mRNA [NM_003917]	AGTACAGCTGAATCTGTCTTTCATTCGACCCCCTGAAAACCCTGCTTTGCTGTTAATCAC	chr14	24029531	24029590	-	FALSE	hs|14q11.2	ENST00000557391	8906	NM_003917	adaptor-related protein complex 1, gamma 2 subunit	GO:0030133|GO:0005515|GO:0005794|GO:0016020|GO:0030121|GO:0008565|GO:0005798|GO:0016032|GO:0016192|GO:0006886|GO:0010008	NM_003917	THC2573744
LINC00312	0.0336529	0.43407	5.67693	5.54776	5.30787	4.13613	5.93651	5.05665	6.94084	6.05287	4.84107	6.67854	6.25898	5.21318	7.89034	6.57882	Homo sapiens long intergenic non-protein coding RNA 312 (LINC00312), long non-coding RNA [NR_024065]	AGTGATATTTGCCTTAGGTCAGATTCTACTAGTTTAAAGCAAAACGATCTCCTGGTCTGA	chr3	8615322	8615381	+	FALSE	hs|3p26.1	ENST00000442796	29931	NR_024065	long intergenic non-protein coding RNA 312	NA	NR_024065	THC2479492
FOXJ1	0.000275605	2.23611	7.21171	7.33791	7.52916	7.98313	7.32511	8.01667	6.4183	6.25264	5.51	6.45777	6.32759	5.90719	6.51521	7.39969	Homo sapiens forkhead box J1 (FOXJ1), mRNA [NM_001454]	TAGCTGTAGCTGAGGCTTAACTGGGAGGGATGCCGAGCTTGCTGGAACTACTGGGACCAA	chr17	74132596	74132655	-	FALSE	hs|17q25.1	ENST00000322957	2302	NM_001454	forkhead box J1	GO:0007389|GO:0060429|GO:0060428|GO:0003700|GO:0030036|GO:0006366|GO:0033085|GO:0000981|GO:0035089|GO:0045409|GO:0005634|GO:0072016|GO:0007283|GO:0050900|GO:0042130|GO:0060972|GO:0006959|GO:0045944|GO:0002635|GO:0002924|GO:0000976|GO:0050869|GO:0035502|GO:0002508|GO:0032088|GO:0000122|GO:0032862|GO:0003677|GO:0002897|GO:0042384|GO:0007420|GO:0060271	NM_001454	THC2472520
PRDM11	0.000250888	0.476052	7.98389	7.97549	8.32415	8.10889	8.38942	8.45313	9.44294	9.70002	9.29297	9.53876	8.3906	9.52671	9.32434	8.61661	Homo sapiens PR domain containing 11 (PRDM11), transcript variant 2, mRNA [NM_001256696]	CAGGTGCTCCATGTGTTGCCCTTGTATCCTCCTTGTCAATAAAGGAAGTTCCGCTGCAGA	chr11	45246582	45246641	+	FALSE	hs|11p11.2	NA	56981	NM_001256696	PR domain containing 11	GO:0008168|GO:0032259	NM_001256696	NP228009
IMPA2	5.09e-07	0.139322	10.9458	11.7985	11.8332	11.5091	12.0005	12.2467	15.3382	14.2317	13.9896	14.8393	14.178	13.5163	15.1361	14.8236	Homo sapiens inositol(myo)-1(or 4)-monophosphatase 2 (IMPA2), mRNA [NM_014214]	TAGCTGTTTCTCTCTTTAATCTCACGTAGCCTTTTTCAGGTTAGTACGTGTTCTTCTGTC	chr18	12030648	12030707	+	FALSE	hs|18p11.21	ENST00000590107	3613	NM_014214	inositol(myo)-1(or 4)-monophosphatase 2	GO:0052833|GO:0052832|GO:0006021|GO:0043647|GO:0006796|GO:0044281|GO:0042803|GO:0046872|GO:0005829|GO:0007165|GO:0046854|GO:0005737|GO:0046855|GO:0008934	NM_014214	THC2602961
GCCAACCACGATGACCCTGTCTCCCAAGAGAAAATGCCAATGACAACGCCAACAAAGATG	0.00740344	0.484218	9.34661	8.98961	9.23004	8.55023	8.4899	8.9534	10.5734	10.1825	10.0206	10.2598	8.63117	9.89497	10.4885	8.95796	chr20	59543832	59543891	+	FALSE	hs|20q13.33	NA	NA	NA	NA	NA	NA	NA	NA	NA
EMX2OS	0.00392456	3.25163	9.0705	8.22456	8.04128	7.2732	7.93525	6.49508	4.99968	4.66667	5.51699	5.38377	6.16934	7.723	7.26585	6.12584	Homo sapiens EMX2 opposite strand/antisense RNA (EMX2OS), long non-coding RNA [NR_002791]	TATGGATGATCTAGGACTAATTCAAGGGTCTAGATTTACCTCCAAACTTTGTTTATCTAC	chr10	119243834	119243893	-	FALSE	hs|10q26.11	NA	196047	NR_002791	EMX2 opposite strand/antisense RNA	NA	NR_002791	NP1163370
LY6E	0.00144353	0.385298	9.97629	10.1674	9.47023	9.79985	9.52896	8.8846	11.6493	10.095	9.81824	11.0317	10.6973	11.7669	10.867	11.4925	Homo sapiens lymphocyte antigen 6 complex, locus E (LY6E), transcript variant 1, mRNA [NM_002346]	CTACTGCGTGACTGTGTCTGCTAGTGCCGGCATTGGGAATCTCGTGACATTTGGCCACAG	chr8	144102816	144103007	+	FALSE	hs|8q24.3	ENST00000522024	4061	NM_002346	lymphocyte antigen 6 complex, locus E	GO:0042415|GO:0055010|GO:0030325|GO:0035265|GO:0005887|GO:0031225|GO:0001701|GO:0007166|GO:0048242	NM_002346	THC2585766
AGTGAGGCAAGATTTACGCGGCGTTTTTCGAGTCCTCTCTGAGCGATCAGAATAAAGAAT	0.000478272	5.02371	4.80541	5.33701	5.48098	4.98061	5.55085	4.97074	0.88117	4.61026	0.939104	0.870778	1.85915	3.24623	3.5257	2.17021	chr16	31487222	31487281	-	FALSE	hs|16p11.2	NA	NA	NA	NA	NA	NA	NA	NA	NA
PRO2958	0.00686683	0.458095	2.29407	2.59664	4.13305	2.09626	3.27433	2.73069	4.08832	3.57567	4.04978	4.0948	3.83316	4.60779	4.35168	4.40888	Homo sapiens PRO2958 mRNA, complete cds. [AF119909]	CTCATCTTTGGGCATCAGCTCTATTTTTCATATCCTCAGACTCCTCTTATAGTCCTTCAA	chr2	15637060	15637119	-	FALSE	hs|2p24.3	NA	100128329	AF119909	uncharacterized LOC100128329	NA	NA	NA
GNG8	0.000571316	0.0559709	7.34495	9.609	9.23591	9.36617	7.3766	7.22937	13.4382	8.89097	14.0326	10.3186	13.1296	13.3701	13.1505	10.8459	Homo sapiens guanine nucleotide binding protein (G protein), gamma 8 (GNG8), mRNA [NM_033258]	CCGCTGGTGACGCCAGTACCCGCCGCGGAGAACCCCTTCCGCGACAAGCGCCTCTTTTGT	chr19	47137345	47137404	-	FALSE	hs|19q13.32	ENST00000300873	94235	NM_033258	guanine nucleotide binding protein (G protein), gamma 8	GO:0005515|GO:0006112|GO:0007186|GO:0005886|GO:0071377|GO:0005834|GO:0003924|GO:0007268|GO:0044281|GO:0004871|GO:0007399	NM_033258	THC2743270
C5orf30	0.0020444	2.53954	10.1573	10.3036	9.4348	10.3649	10.0484	10.4464	6.90997	8.9582	9.69242	9.04882	9.69454	8.12543	7.85693	8.19489	Homo sapiens chromosome 5 open reading frame 30 (C5orf30), mRNA [NM_033211]	ATCAGATTTCTCGTTGGGCTGGAAATGTTTCGCTGTTGTATATTTTAAAGTAAATTGCAC	chr5	102613812	102613871	+	FALSE	hs|5q21.1	ENST00000510890	90355	NM_033211	chromosome 5 open reading frame 30	GO:0005515|GO:0005737|GO:0060271|GO:0035869|GO:0015031	NM_033211	THC2461293
PPP1R1C	0.000940508	4.58496	7.37595	9.28201	8.36668	8.74958	7.96979	6.99756	6.70493	5.92247	6.16705	6.01874	5.76268	6.66945	6.03159	5.22469	Homo sapiens protein phosphatase 1, regulatory (inhibitor) subunit 1C (PPP1R1C), transcript variant 3, mRNA [NM_001080545]	ACCCCACACTCATACAGTAGCTATGCACATCCTGGAAGTCTCCTTGACTGAACTTTAGAA	chr2	182982132	182982191	+	FALSE	hs|2q31.3	ENST00000479855	151242	NM_001080545	protein phosphatase 1, regulatory (inhibitor) subunit 1C	GO:0035556|GO:0007049|GO:0005737|GO:1900087|GO:0030307|GO:0004864|GO:0004865|GO:0006469|GO:0051301	NM_001080545	THC2535375
SNAP29	0.00100981	0.452372	6.65637	7.81739	6.90393	7.37824	6.96054	6.91703	8.07477	7.96259	8.80596	8.40655	7.60281	9.10698	8.15405	7.58603	Homo sapiens synaptosomal-associated protein, 29kDa (SNAP29), mRNA [NM_004782]	TCCCAGCCCAACAACAGATTGAAAGAAGCTATAAGTACAAGTAAAGAACAGGAAGCAAAG	chr22	21224805	21235379	+	FALSE	hs|22q11.21	ENST00000215730	9342	NM_004782	synaptosomal-associated protein, 29kDa	GO:0000046|GO:0019905|GO:0043005|GO:0005813|GO:0016082|GO:0030054|GO:0005886|GO:0045202|GO:0031201|GO:0006887|GO:0015031|GO:0006903|GO:0005484|GO:0005737|GO:0061025|GO:0031629	NM_004782	THC2586219
GATS	6.61e-05	0.234318	3.5513	2.92187	4.45646	4.40595	3.78189	4.27398	6.49229	6.41557	5.2944	6.26809	5.95031	4.98325	5.42217	6.85422	Homo sapiens GATS, stromal antigen 3 opposite strand (GATS), transcript variant 2, non-coding RNA [NR_028038]	ACTATTTTAAAGCATCAGTCAAATTGACATTAACATCTGTTAACTGTAAACAGTCACACT	chr7	99807924	99807983	-	FALSE	hs|7q22.1	NA	352954	NR_028038	GATS, stromal antigen 3 opposite strand	NA	NR_028038	THC2463982
GLS2	0.015694	2.0798	10.3921	10.2185	10.0756	10.1624	9.84551	10.3074	6.17401	8.11458	9.74936	8.91269	9.77699	8.90397	8.17186	10.1258	Homo sapiens glutaminase 2 (liver, mitochondrial) (GLS2), transcript variant 1, mRNA [NM_013267]	GTTTGCCTTGTCAGCCATGGATATGGAACAGAAAGACTATGACTCGCGCACAGCTCTGCA	chr12	56865920	56865979	-	FALSE	hs|12q13.3	ENST00000486433	27165	NM_013267	glutaminase 2 (liver, mitochondrial)	GO:0005515|GO:0006520|GO:0072593|GO:0007268|GO:0008652|GO:0042981|GO:0044281|GO:0014047|GO:0007269|GO:0005739|GO:0034641|GO:0005759|GO:0004359|GO:0006541	NM_013267	NP704248
GGTTGTTTTTCTTTGCCCCCCAAGTTTATTTTTGTTTTCTCCCGGCCCCCAACCTCTGAA	0.0066517	0.350742	8.87057	9.19024	9.44027	9.09	9.27499	9.01226	10.8384	10.8647	10.6426	10.4612	8.62123	11.7681	10.7596	9.47488	chr15	93608464	93608523	-	FALSE	hs|15q26.1	NA	NA	NA	NA	NA	NA	NA	NA	NA
C2CD2	0.000787001	0.297154	8.25898	8.09662	7.96824	7.55774	8.15582	7.36521	10.2421	9.91299	8.08573	9.43633	9.93445	8.25551	10.0356	10.1266	Homo sapiens C2 calcium-dependent domain containing 2 (C2CD2), transcript variant 1, mRNA [NM_015500]	GTAGCCATCTCCTTGTTGCAGCTGAAAACCTGCTGTGAGAGTTTTGACAGAGCACTTTAT	chr21	43306033	43306092	-	FALSE	hs|21q22.3	ENST00000380486	25966	NM_015500	C2 calcium-dependent domain containing 2	GO:0005634|GO:0005576|GO:0005829	NM_015500	THC2516266
AF035151 RGS12 PDZ-less variant {Rattus norvegicus} (exp=-1; wgp=0; cg=0), partial (3%) [THC2553569]	0.00010937	0.392092	4.66954	5.20055	5.73517	4.83975	4.62817	5.09824	6.68482	6.68827	6.56275	6.47515	5.30959	6.58139	6.55345	6.16657	TCCTTTCAAGGTATTAACTTCCCTCCTTCTTTGAAATGCTCTTATAGTTTTCCCTCTCCC	chr15	60675729	60675788	+	FALSE	hs|15q22.2	NA	NA	NA	NA	NA	NA	THC2553569	NA
DB728175 RIKEN full-length enriched human cDNA library, hypothalamus Homo sapiens cDNA clone H033001B22 3', mRNA sequence [DB728175]	0.000118073	3.99815	6.03159	5.58184	5.83778	6.52473	6.31714	5.87185	4.39406	4.72686	3.65736	4.52164	2.57945	4.16151	4.41705	2.42187	ATCACAACAGTCTGTCAATTAAGGAATTGCTCATATTCTCGTCAATAAAGAGCAAACTCG	chr1	98196748	98196807	-	FALSE	hs|1p21.3	NA	NA	DB728175	NA	NA	NA	THC2612074	NA
LRRC8C	0.0439125	0.437039	7.33398	6.5826	7.36425	6.99023	7.53206	6.75022	7.20212	7.3916	6.34576	7.97013	8.00931	9.24311	9.36515	8.63631	Homo sapiens leucine rich repeat containing 8 family, member C (LRRC8C), mRNA [NM_032270]	AAACTCTGAAGATTGGAAAAAACAGCCTATCTGTACTTTCACCGAAAATTGGAAATTTGC	chr1	90180324	90180383	+	FALSE	hs|1p22.2	ENST00000370454	84230	NM_032270	leucine rich repeat containing 8 family, member C	GO:0005515|GO:0016020|GO:0005886|GO:0005789|GO:0045444|GO:0016021|GO:0006811	NM_032270	THC2474475
SALL4	0.00051939	2.87739	6.52565	6.56399	6.20123	5.2322	6.62587	5.56738	4.53133	4.68882	4.66474	4.52229	4.19714	4.44524	5.6236	4.25522	Homo sapiens spalt-like transcription factor 4 (SALL4), mRNA [NM_020436]	TGGCTCCCAGTCGGGTATCAGTGCAGATGTGGAAAAACCAAGTGCTACTGACGGCGTTCC	chr20	50400856	50400915	-	FALSE	hs|20q13.2	ENST00000371539	57167	NM_020436	spalt-like transcription factor 4	GO:0000792|GO:0001833|GO:0001843|GO:0003281|GO:0000122|GO:0030326|GO:0003677|GO:0046872|GO:0006351|GO:0043231|GO:0043234|GO:0005737|GO:0045944|GO:0005654|GO:0035019	NM_020436	NP868666
ACTA1	0.000300825	4.47619	8.62146	9.12146	9.63956	8.60302	9.87447	10.3431	7.54021	7.18231	7.11613	6.81523	8.01206	6.97139	7.25255	7.52605	Homo sapiens actin, alpha 1, skeletal muscle (ACTA1), mRNA [NM_001100]	CCGCAGTCACTTTCTTTGTAACAACTTCCGTTGCTGCCATCGTAAACTGACACAGTGTTT	chr1	229567109	229567168	-	FALSE	hs|1q42.13	ENST00000366683	58	NM_001100	actin, alpha 1, skeletal muscle	GO:0030240|GO:0005515|GO:0001725|GO:0030049|GO:0005884|GO:0009991|GO:0048741|GO:0072562|GO:0048545|GO:0015629|GO:0030017|GO:0005524|GO:0005615|GO:0005829|GO:0009612|GO:0006936|GO:0010226|GO:0043531|GO:0043503|GO:0005200|GO:0005865|GO:0016049|GO:0017022|GO:0070062	NM_001100	THC2569297
KRBOX1	0.00851042	2.47848	7.74564	8.38801	7.88958	8.02337	7.79739	8.77228	5.74122	3.94059	3.73106	8.23273	8.71392	5.96568	5.01539	4.35231	Homo sapiens KRAB box domain containing 1 (KRBOX1), mRNA [NM_001205272]	GTCAATGCTGGGAAGACAGGAGAAAAGCTTAATTCTTGACATTTAAATACCAGTTTTCCA	chr3	42984108	42984167	+	FALSE	hs|3p22.1	ENST00000463888	100506243	NM_001205272	KRAB box domain containing 1	GO:0005622|GO:0006355|GO:0003676	NM_001205272	THC2616183
LY6H	0.00140378	6.25639	9.85373	11.7729	11.337	12.049	11.15	10.4828	8.35646	4.77103	4.6499	8.52587	5.54505	10.8086	8.87767	6.99045	Homo sapiens lymphocyte antigen 6 complex, locus H (LY6H), transcript variant 1, mRNA [NM_002347]	TTAACTCTGGGATCTTAAAGGTCGACGTGGACTGCTGCGAGAAGGATTTGTGCAATGGGG	chr8	144239753	144239812	-	FALSE	hs|8q24.3	ENST00000610554	4062	NM_002347	lymphocyte antigen 6 complex, locus H	GO:0005886|GO:0009887|GO:0031225|GO:0007399	NM_002347	THC2649891
ACTG1	4.22e-05	3.38685	17.2889	17.063	17.1116	17.3188	17.4205	17.2085	15.5853	15.2971	14.3283	14.6151	15.9132	15.3225	16.1267	15.7838	Homo sapiens actin gamma 1 (ACTG1), transcript variant 2, mRNA [NM_001614]	TCTACCGTCATGTGAGAACATTAGGCCCCAGCAACACGTCATTGTGTAAGGAAAAATAAA	chr17	79477014	79477064	-	FALSE	hs|17q25.3	ENST00000573283	71	NM_001614	actin gamma 1	GO:0005515|GO:0005886|GO:0006928|GO:0072562|GO:0005634|GO:0030016|GO:0005615|GO:0005829|GO:0042802|GO:0007411|GO:0001895|GO:0061024|GO:0005856|GO:0031625|GO:0070062|GO:0048010|GO:0048013|GO:0034329|GO:0045214|GO:0005524|GO:0045216|GO:0070527|GO:0031941|GO:0016020|GO:0045087|GO:0005200|GO:0038096|GO:0034332	NM_001614	THC2470232
TTBK1	0.00288893	0.313856	7.65851	7.53061	7.98836	7.8604	7.73188	7.71578	9.66189	9.88338	9.61447	9.46507	7.47646	10.0368	9.60227	7.99487	PREDICTED: Homo sapiens tau tubulin kinase 1 (TTBK1), transcript variant X1, mRNA [XM_006715229]	CCCTGCGACGACTGGCGTCCTCCGTGTTCTCCTCCTCCACGCTGGAGACGGAGCATTACC	chr6	43237427	43237486	+	FALSE	hs|6p21.1	NA	84630	XM_006715229	tau tubulin kinase 1	GO:0005737|GO:0018105|GO:0021762|GO:0004674|GO:0008360|GO:0005634|GO:0005524	XM_006715229	THC2487669
PTPRO	7.21e-06	7.01328	7.78167	7.52034	6.13831	7.29115	6.92382	6.34648	3.92835	3.96734	3.39221	3.89787	4.34757	5.38837	4.60836	3.95886	Homo sapiens protein tyrosine phosphatase, receptor type, O (PTPRO), transcript variant 1, mRNA [NM_030667]	AACTGTTCTAGTTCTTGATGGTTTTCTTCCTTATTAACAGTTGGTGTTTCTTCCTTGGCC	chr12	15749688	15749747	+	FALSE	hs|12p12.3	ENST00000281171	5800	NM_030667	protein tyrosine phosphatase, receptor type, O	GO:0005515|GO:0072112|GO:0043005|GO:0017147|GO:0030424|GO:0090260|GO:0036060|GO:0005886|GO:0030032|GO:0010812|GO:0042803|GO:0032835|GO:0035335|GO:0030426|GO:0016791|GO:0016324|GO:0006470|GO:0043197|GO:0007411|GO:0005001|GO:0090090|GO:0004725|GO:0070062|GO:0003105|GO:0016328|GO:0030027|GO:0002548|GO:0000902|GO:0005887|GO:0003093|GO:0010977|GO:0016021	NM_030667	THC2479375
EXTL1	4.58e-05	0.302182	6.63814	7.10935	6.53207	6.86566	6.09545	5.82771	8.52813	8.34611	7.98333	8.94419	8.81495	7.45616	7.88958	7.78556	Homo sapiens exostosin-like glycosyltransferase 1 (EXTL1), mRNA [NM_004455]	CCCATCTCTTTCGCCTGCACACTTGGAACTCAGCAAGAAGGGACTGTTTCTAGGTGGGCT	chr1	26362746	26362805	+	FALSE	hs|1p36.11	ENST00000374280	2134	NM_004455	exostosin-like glycosyltransferase 1	GO:0050508|GO:0001501|GO:0005789|GO:0006486|GO:0016021|GO:0015012|GO:0006024	NM_004455	THC2464836
NTRK2	3.24e-05	0.493411	6.34712	6.17125	6.13197	6.18749	6.34475	6.35366	7.66448	7.64801	7.23376	7.12837	6.63569	7.35975	7.27983	7.00948	Homo sapiens neurotrophic tyrosine kinase, receptor, type 2 (NTRK2), transcript variant a, mRNA [NM_006180]	AAGCTGCTCTCCTTCACTCTGACAGTATTAACATCAAAGACTCCGAGAAGCTCTCGAGGG	chr9	87636441	87636500	+	FALSE	hs|9q21.33	ENST00000323115	4915	NM_006180	neurotrophic tyrosine kinase, receptor, type 2	GO:0035584|GO:0048709|GO:0010996|GO:0060291|GO:2000811|GO:0042803|GO:0043524|GO:0032314|GO:0046777|GO:0045211|GO:0071356|GO:0009416|GO:0007612|GO:0005791|GO:0048786|GO:0048403|GO:0009986|GO:0007616|GO:0051968|GO:0007568|GO:0046548|GO:0046928|GO:0018108|GO:0014068|GO:0060076|GO:0043235|GO:0046875|GO:0005887|GO:0010976|GO:0060175|GO:0050773|GO:0048935|GO:0007623|GO:0050772|GO:0010008|GO:0007631|GO:…	NM_006180	THC2485265
GAD1	0.0314459	2.48706	5.7418	3.22702	6.006	5.748	5.60203	5.90116	2.54052	2.04148	4.55865	1.30222	4.57722	5.39307	5.39638	3.46904	Homo sapiens glutamate decarboxylase 1 (brain, 67kDa) (GAD1), transcript variant GAD67, mRNA [NM_000817]	CTTGGCTTTGGAACTGACAATGTGATTTTGATAAAGTGCAATGAAAGGGGGAAAATAATT	chr2	171702249	171702531	+	FALSE	hs|2q31.1	ENST00000414527	2571	NM_000817	glutamate decarboxylase 1 (brain, 67kDa)	GO:0005515|GO:0012506|GO:0046982|GO:0005886|GO:0042493|GO:0006538|GO:0007268|GO:0018352|GO:0007269|GO:0005622|GO:0047485|GO:0004351|GO:0030170|GO:0061202|GO:0042136|GO:0016595|GO:0006540|GO:0009449	NM_000817	NP098236
EF1B_HUMAN (P24534) Elongation factor 1-beta (EF-1-beta), complete [THC2559752]	0.000175846	19.4774	9.32728	8.95133	9.25573	8.72056	9.29454	9.17888	1.24925	1.76993	5.12321	0.846548	3.88533	5.88297	6.74551	2.94832	AGAGGACACCATTCCGACACAAACGTTTATGTGATTTTAGCCATTACAACAGTAATTCAG	chr6	3224719	3224778	+	FALSE	hs|6p25.2	NA	NA	NA	NA	GO:0005853|GO:0003746|GO:0006414	NA	THC2559752	NA
L3MBTL1	0.00021825	2.09313	10.4233	10.9156	10.6309	10.4798	10.3344	10.4342	8.97842	8.97496	10.0698	9.62552	9.88675	8.67332	9.25266	9.8001	Homo sapiens l(3)mbt-like 1 (Drosophila) (L3MBTL1), transcript variant II, mRNA [NM_032107]	TTTGCTTGCCAAACTTAGCTTTGCCAGTGATAGTCAATATTAAAGTGTACTTTTTTCCCC	chr20	42169726	42169785	+	FALSE	hs|20q13.12	ENST00000373133	26013	NM_032107	l(3)mbt-like 1 (Drosophila)	GO:0030097|GO:0005515|GO:0000793|GO:0007088|GO:0003700|GO:0005886|GO:0005730|GO:0031491|GO:0005634|GO:0035064|GO:0031493|GO:0032093|GO:0006351|GO:0042802|GO:0045652|GO:0042393|GO:0003682|GO:0051726|GO:0005654|GO:0008270|GO:0045892|GO:0000785|GO:0016568	NM_032107	THC2488778
GAGAGGGATCAGATGAACTTATTCAGGGTTACATATATTTTCACAATGTAAGCACTCTGA	0.0185214	0.494157	7.06149	7.34755	6.80384	7.0499	6.71437	7.20484	8.11633	8.38298	8.89871	8.47843	6.73669	7.68795	8.1091	6.7278	chr8	47503712	47503771	-	FALSE	hs|8q11.1	NA	NA	NA	NA	NA	NA	NA	NA	NA
AGENCOURT_6543460 NIH_MGC_71 Homo sapiens cDNA clone IMAGE:5549618 5', mRNA sequence [BM552308]	0.000799094	0.351411	7.2627	8.48751	7.0697	8.21462	8.23327	7.23987	9.36997	9.29094	9.14896	9.31	9.50615	8.26776	8.9729	10.3086	CTGACTTAGGGTTAGAATGGCCCAATGATCCTACAACTTTTTGATGCTATTTCATTTGAT	chr12	8116410	8116469	-	FALSE	hs|12p13.31	NA	NA	BM552308	NA	NA	NA	THC2520858	NA
RCOR1	0.00667635	0.337959	3.57724	3.19642	4.45126	4.05215	4.28466	4.52955	6.41353	6.06003	5.26277	5.4673	4.0216	6.62233	5.23829	3.99235	Homo sapiens REST corepressor 1 (RCOR1), mRNA [NM_015156]	AACTTTTTTGTAAATTATCGACGCCGCTTCAACATAGATGAAGTTTTACAAGAATGGGAG	chr14	103188598	103188657	+	FALSE	hs|14q32.31	ENST00000560472	23186	NM_015156	REST corepressor 1	GO:0005515|GO:0070933|GO:0044212|GO:0006325|GO:0005634|GO:0000122|GO:0006351|GO:0001078|GO:0045654|GO:0007596|GO:0003682|GO:0017053|GO:0030218|GO:0016032|GO:0005654|GO:0045892	NM_015156	THC2633239
LOC101928790	0.000431087	0.46556	5.57919	5.61416	5.65599	5.33351	4.57635	5.03022	6.61623	6.56545	6.30534	6.58112	6.57773	6.42543	6.58184	5.75728	Homo sapiens uncharacterized LOC101928790 (LOC101928790), transcript variant 1, long non-coding RNA [NR_110059]	ATCGTCCTGATATAGCCTGCAGTCCATCTGGGCCTCTAGACATTCATTTGCATTTGCATT	chr3	179639508	179639567	+	FALSE	hs|3q26.33	NA	101928790	NR_110059	uncharacterized LOC101928790	NA	NR_110059	THC2673635
NOXO1	4.1e-07	3.09261	8.81739	9.2023	9.42053	9.27973	9.35482	9.45285	7.15652	7.49421	7.20984	7.28002	8.20444	7.88709	7.62858	7.90867	Homo sapiens NADPH oxidase organizer 1 (NOXO1), transcript variant a, mRNA [NM_144603]	TGGCCAGCAGGGATGGGAGGGGGCCATTTGCTGTTCCTCTGAGTAAAGCTTGTTCTGCAT	chr16	2028920	2028979	-	FALSE	hs|16p13.3	ENST00000354249	124056	NM_144603	NADPH oxidase organizer 1	GO:0005515|GO:0005543|GO:0022617|GO:0016176|GO:0006801|GO:0060263|GO:0010310|GO:0043020|GO:0043085|GO:0035091|GO:0019899|GO:0042802	NM_144603	THC2477137
ACAP1	0.000719349	0.444011	5.13588	4.21572	3.78978	4.01377	3.88612	3.99385	5.83563	5.19771	5.18593	5.40578	4.96476	5.88398	5.35122	5.32031	Homo sapiens ArfGAP with coiled-coil, ankyrin repeat and PH domains 1 (ACAP1), mRNA [NM_014716]	GTTCACTTCTCCAAAGTCCGGTCTCTGACCCTTGACTCATGGGAGCCAGAACTAGTGAAG	chr17	7251251	7251310	+	FALSE	hs|17p13.1	ENST00000576594	9744	NM_014716	ArfGAP with coiled-coil, ankyrin repeat and PH domains 1	GO:0043547|GO:0008060|GO:0016020|GO:0032312|GO:0008270|GO:0015031|GO:0055038	NM_014716	THC2644618
AGCAGACATTAATATCCATGCCATCATTGAAGTTGGAAGTTCATGAGGCCAAGCCTGTGC	0.00266746	0.269183	5.51025	5.78963	6.03942	5.95484	5.85738	6.45627	8.29466	8.49531	8.47219	7.90615	5.84686	7.95179	7.75141	6.00862	NA	NA	NA	NA	FALSE	NA	NA	NA	NA	NA	NA	NA	NA	NA	NA
Homo sapiens brevican, mRNA (cDNA clone IMAGE:3618761), with apparent retained intron. [BC005081]	0.0142266	2.0514	5.06902	4.95016	5.09936	3.55368	5.02624	3.96404	4.57327	3.05673	3.57186	3.40101	3.29067	4.19243	3.88774	2.50987	GTTGTTCAAAGAAGAAGGAGGAGGGAGTCAATTAGACTGTAAGAAGTGGATGAAGGGAGA	chr1	156611515	156611574	-	FALSE	hs|1q23.1	NA	NA	BC005081	NA	NA	NA	THC2608937	NA
PLEKHG5	5.48e-06	4.63757	11.451	10.5152	11.1183	10.5074	10.6029	10.5475	7.39511	7.88769	8.52587	8.19268	9.06693	8.35841	9.03214	9.46424	Homo sapiens pleckstrin homology domain containing, family G (with RhoGef domain) member 5 (PLEKHG5), transcript variant 2, mRNA [NM_198681]	CTTCCCAGTCCCACAGGCCACCCCTGGCTTGGGCTGGGTTCTGTGAAGTTACGTATTTAT	chr1	6527222	6527281	-	FALSE	hs|1p36.31	ENST00000377732	57449	NM_198681	pleckstrin homology domain containing, family G (with RhoGef domain) member 5	GO:0051056|GO:0048471|GO:0048011|GO:0035767|GO:0043065|GO:0005886|GO:0007264|GO:0030139|GO:0097190|GO:0030027|GO:0005829|GO:0005737|GO:0005911|GO:0032321|GO:0004871|GO:0005089|GO:0043123	NM_198681	THC2575782
AGGATTTGATGGCACGGGGTCCTGGCTCTTTCTTCTTTGCCATTTTTAGCTATTGATGAG	9.68e-05	0.215885	7.17076	6.9367	7.00615	6.89854	6.46183	6.8977	9.41103	9.22147	9.28094	9.46442	7.39056	9.64436	9.29204	8.00509	chr22	38171860	38171919	-	FALSE	hs|22q13.1	NA	NA	NA	NA	NA	NA	THC2515524	NA	NA
IGFBP5	0.00014057	8.06863	13.5239	13.3002	13.4366	12.934	13.9759	12.9895	10.6596	8.39901	7.79459	9.39689	9.80467	10.4524	12.3654	8.32839	Homo sapiens insulin-like growth factor binding protein 5 (IGFBP5), mRNA [NM_000599]	CCACAGTACATATTACTGTAGTTCTCTATAGTTTTACATACATTCATACCATAACTCTGT	chr2	217537167	217537226	-	FALSE	hs|2q35	ENST00000233813	3488	NM_000599	insulin-like growth factor binding protein 5	GO:0017148|GO:0005515|GO:0048630|GO:0051897|GO:0031994|GO:0031995|GO:0005615|GO:0001558|GO:0014912|GO:0010906|GO:0031069|GO:0035556|GO:0044342|GO:0006006|GO:0001968|GO:0030336|GO:0060056|GO:0005576|GO:0048662|GO:0042593|GO:0016942|GO:0001649|GO:0007165|GO:0071407|GO:0045668|GO:0043569|GO:0043568|GO:0071320|GO:0044267|GO:0051146	NM_000599	THC2561338
CTGCTCCTGCATGGGTGCCAGGGGAGAGAATGGGAAATCAGTGAGATGTGGGTGTGTTAA	0.000342959	0.461251	5.24975	5.19385	5.13262	5.55061	4.84339	5.35497	6.94849	6.663	6.40439	6.58395	5.42712	6.24263	6.29488	5.67901	chr13	113470809	113470868	-	FALSE	hs|13q34	NA	NA	NA	NA	NA	NA	THC2650012	NA	NA
Homo sapiens cDNA FLJ12106 fis, clone HEMBB1002702. [AK022168]	0.00128907	3.30966	7.39653	6.95443	6.82863	7.11151	6.59703	5.56	3.82091	3.41254	6.54419	3.73689	4.89402	4.82759	6.15307	4.05454	GAAGACTTACTCCTTTTAAACAAATTTTCACCCTTTCTAACAGTTTAGCTGAACATCCTG	chr10	53393086	53393145	+	FALSE	hs|10q21.1	NA	NA	AK022168	NA	NA	NA	THC2604474	NA
AFF3	0.000176872	0.376891	6.7753	6.65362	6.76702	7.04308	7.93843	6.82485	8.77856	8.6469	8.4584	8.49272	8.03805	9.10206	8.24997	7.6122	Homo sapiens AF4/FMR2 family, member 3 (AFF3), transcript variant 1, mRNA [NM_002285]	ACGTTTGCCAGCCCAGCCTGAGAGAGAAGGAGATCAAGAGCACTTGCAAGGAGGAGCAAA	chr2	100210529	100210588	-	FALSE	hs|2q11.2	ENST00000317233	3899	NM_002285	AF4/FMR2 family, member 3	GO:0006355|GO:0005737|GO:0003690|GO:0035116|GO:0034612|GO:0005654|GO:0005634|GO:0006351	NM_002285	THC2470663
CAGCCTCCCAACCCCCTATCAAAACAGCAGCCCCCAAACCCCTATCAAAACTGCAGCTCC	0.00338167	0.190797	9.72284	9.5488	9.87629	9.55523	10.5328	9.85027	12.7677	12.7893	12.4764	12.141	9.20547	12.8261	12.6339	10.3356	chr5	692373	692432	+	FALSE	hs|5p15.33	NA	NA	NA	NA	NA	NA	NA	NA	NA
RGPD1	8.65e-06	18.0429	8.01445	5.9465	7.26008	6.7432	5.95757	6.08408	0.866668	0.938075	0.972164	0.846707	1.59808	3.70477	4.4641	2.78204	Homo sapiens RANBP2-like and GRIP domain containing 1 (RGPD1), mRNA [NM_001024457]	CAGTGATATGAAAAAGTGCCAAACAGGGCTATAAAATTGTGGTCTACTGTAAATGGTTTG	chr2	87240733	87240792	+	FALSE	hs|2p11.2	ENST00000409776	400966	NM_001024457	RANBP2-like and GRIP domain containing 1	GO:0000042	NM_001024457	THC2472073
IL2RB	0.0145903	0.297768	6.71765	6.87607	5.43193	6.33338	6.23895	6.10806	8.72613	5.88857	6.99399	8.75187	9.26258	8.3037	6.98509	6.65152	Homo sapiens interleukin 2 receptor, beta (IL2RB), mRNA [NM_000878]	TTGAGGTTGTCTGAGTCTTGGGTCTATGCCTTGAAAAAAGCTGAATTATTGGACAGTCTC	chr22	37522281	37522340	-	FALSE	hs|22q12.3	ENST00000216223	3560	NM_000878	interleukin 2 receptor, beta	GO:0007165|GO:0043066|GO:0004911|GO:0006461|GO:0016020|GO:0005886|GO:0005887|GO:0019221|GO:0016032|GO:0038110|GO:0019976|GO:0009897	NM_000878	THC2462560
TAGGTGATTATATCTTTGGTACCGTATTGAGAACCCACTCTCCCTCCTTGGACCAACTCT	0.00413185	0.361598	8.25747	7.90429	8.33495	8.14523	8.06603	7.94894	9.36617	9.3216	9.13268	9.33978	7.97937	11.055	9.54649	8.99094	chr5	149493544	149493603	+	FALSE	hs|5q32	NA	NA	NA	NA	NA	NA	NA	NA	NA
ATTTAAATGCTGACACTGTCTCCAGCGAGTTGCAAAACAATGTTTATACCATTGCCAAGA	1.87e-05	0.457731	5.61114	6.42028	6.01165	6.04466	6.11028	5.72456	7.22471	7.14761	7.6589	7.29991	6.9199	6.86422	7.07716	6.69607	chrX	92477396	92477455	-	FALSE	hs|Xq21.32	ENST00000441188	NA	NA	NA	NA	NA	NA	NA	NA
FAM189A2	0.000740694	2.56124	10.1302	11.4341	11.558	10.829	11.1996	10.582	9.46382	9.60626	10.2179	10.0332	9.19387	8.65148	10.1335	9.50657	Homo sapiens family with sequence similarity 189, member A2 (FAM189A2), transcript variant 1, mRNA [NM_004816]	GAGGATTATTGTTGATTCCATTTACTCATGCTTGCAAAACTAGAGACCCCTAAGGCAGAA	chr9	72007284	72007343	+	FALSE	hs|9q21.11	ENST00000257515	9413	NM_004816	family with sequence similarity 189, member A2	GO:0008150|GO:0003674|GO:0016021|GO:0005575	NM_004816	THC2473726
PRB3	0.00244139	0.213894	9.46678	8.93657	9.49994	9.23661	9.62245	9.86085	11.9628	12.0199	11.8105	11.748	9.14746	12.5401	11.9224	9.76262	Homo sapiens proline-rich protein BstNI subfamily 3 (PRB3), mRNA [NM_006249]	CAAGGTCCCCCACCTCGTCCAGGAAAGCCAGAAGGATCACCTTCACAAGGAGGCAACAAA	chr12	11420478	11420537	-	FALSE	hs|12p13.2	ENST00000617030	5544	NM_006249	proline-rich protein BstNI subfamily 3	GO:0050829|GO:0008150|GO:0005576	NM_006249	THC2479522
PRRX2	0.000266135	12.9788	7.75196	7.07695	7.03657	5.44121	9.12331	6.96936	1.03526	0.665367	0.705217	1.34554	0.709974	5.76247	5.66959	3.24853	Homo sapiens paired related homeobox 2 (PRRX2), mRNA [NM_016307]	CAAGGACCTCATTTAGTTTGTGTATTAAAACCAAAAAGCTTTTGTCTTTAAGAAATAAAA	chr9	132484873	132484932	+	FALSE	hs|9q34.11	ENST00000372469	51450	NM_016307	paired related homeobox 2	GO:0043565|GO:0045880|GO:0006355|GO:0042472|GO:0003700|GO:0051216|GO:0048844|GO:0042474|GO:0005634|GO:0002053|GO:0030326|GO:0048701	NM_016307	THC2474197
Homo sapiens, clone IMAGE:5785547, mRNA. [BC047952]	0.00130331	0.401523	10.98	11.1947	10.5558	11.4993	10.4189	11.0201	11.5818	13.266	12.6268	12.269	11.0186	11.9401	12.4676	12.1986	AAGTTTGTCATTGATGGTATCTTCAAAGCTGAACTGAATGAAGTTCTCATTCAGGAGCTG	chr6	100023615	100023674	+	FALSE	hs|6q16.2	ENST00000407121	NA	BC047952	NA	NA	NA	THC2510512	NA
OR5L2	0.0179084	0.297169	8.02065	7.71233	8.39735	8.09967	8.64855	7.56846	10.1455	10.2944	10.3129	10.0288	7.71601	10.9311	7.56315	8.79794	Homo sapiens olfactory receptor, family 5, subfamily L, member 2 (OR5L2), mRNA [NM_001004739]	CTCTTCTATAGATCTAATGTGATTAACCACTTCTTCTGTGATCTACCCCCTCTCCTAAGT	chr11	55595193	55595252	+	FALSE	hs|11q11	ENST00000378397	26338	NM_001004739	olfactory receptor, family 5, subfamily L, member 2	GO:0050911|GO:0004984|GO:0007186|GO:0005886|GO:0004930|GO:0016021	NM_001004739	THC2604332
SHISA5	0.00586327	0.395847	8.39754	8.31635	8.76612	9.13861	9.2227	9.20421	10.5533	10.716	10.4664	10.1993	8.36179	10.6197	10.4278	9.01867	Homo sapiens shisa family member 5 (SHISA5), transcript variant 1, mRNA [NM_016479]	CCAATGCAGTACCCACCACCTTACCCAGCCCAGCCCATGGGCCCACCGGCCTACCACGAG	chr3	48510770	48510829	-	FALSE	hs|3p21.31	ENST00000486344	51246	NM_016479	shisa family member 5	GO:0005515|GO:0042771|GO:0031965|GO:0050699|GO:0005789|GO:0016021|GO:0004871|GO:0043123|GO:0070062	NM_016479	NP1190817
TACAAGTGAGTTTTGATATTGTCACCTTTCAGTGGAAAATACATATGTCTTTGAGGTAGC	1.58e-05	40.1752	6.36067	6.87223	6.9067	7.05102	4.81027	5.42555	0.878236	0.928579	0.999895	0.867054	0.989307	1.682	1.39517	0.975542	chr13	92893917	92893976	+	FALSE	hs|13q31.3	NA	NA	NA	NA	NA	NA	THC2532971	NA	NA
TSPEAR	8.95e-10	30.0861	7.79481	8.72712	8.30181	8.25279	8.18564	7.50607	2.27227	2.84732	2.6591	3.03645	4.18859	2.73069	3.85257	3.48763	Homo sapiens thrombospondin-type laminin G domain and EAR repeats (TSPEAR), transcript variant 1, mRNA [NM_144991]	AGAGTTTACAATGTGCTTTTTCCGCCAATCAGAACTGTGGACAAAACTTCCTATTTCCTA	chr21	45918516	45918575	-	FALSE	hs|21q22.3	ENST00000614657	54084	NM_144991	thrombospondin-type laminin G domain and EAR repeats	GO:0003674|GO:0060170|GO:0009986|GO:0007605|GO:0032420|GO:0005576	NM_144991	THC2482949
ALAS2	0.000450477	0.0981991	4.52599	4.34632	4.13843	3.44613	6.22433	6.40902	9.20868	6.82903	6.19182	9.94316	6.96643	9.14584	8.25242	8.59145	Homo sapiens 5'-aminolevulinate synthase 2 (ALAS2), transcript variant 1, mRNA [NM_000032]	GCTTTGTTGTGTGCCTCTAGCTGAATTGAGCCTAAAAATAAAGCACAAACCACAGCATGT	chrX	55035488	55035544	-	FALSE	hs|Xp11.21	ENST00000330807	212	NM_000032	5'-aminolevulinate synthase 2	GO:0042541|GO:0005515|GO:0050662|GO:0001666|GO:0005743|GO:0044281|GO:0006782|GO:0006783|GO:0005739|GO:0006879|GO:0006778|GO:0005759|GO:0030170|GO:0030218|GO:0016594|GO:0032364|GO:0003870	NM_000032	THC2464598
AQP1	0.00834978	0.277131	10.5062	9.3619	8.96101	7.81235	10.5741	8.24168	10.9474	10.6924	9.58792	11.6163	10.4202	12.5013	12.4612	11.0278	Homo sapiens aquaporin 1 (Colton blood group) (AQP1), transcript variant 1, mRNA [NM_198098]	ATCTGCACACTCTCTTCTCCATTCCCTAGCAGGAACTTCTAGCTCATTTAACAGATAAAG	chr7	30964759	30964818	+	FALSE	hs|7p14.3	ENST00000311813	358	NM_198098	aquaporin 1 (Colton blood group)	GO:0005515|GO:0015079|GO:0020003|GO:0043627|GO:0070301|GO:0020005|GO:0048593|GO:0030157|GO:0031526|GO:0035377|GO:0006884|GO:0034644|GO:0009925|GO:0015793|GO:0006833|GO:0033363|GO:0070062|GO:0005223|GO:0031965|GO:0030950|GO:0015696|GO:0005267|GO:0042538|GO:0033554|GO:0035378|GO:0035379|GO:0046878|GO:0051458|GO:0046875|GO:0005887|GO:0006182|GO:0042060|GO:0015701|GO:0071241|GO:0071280|GO:0005886|GO:…	NM_198098	NP1203192
CNKSR3	0.000167936	12.4944	6.80111	5.79769	8.91609	5.87294	6.671	5.96033	1.70146	0.720023	1.00179	2.94673	1.78476	3.85336	5.70234	3.10094	CNKSR family member 3 [Source:HGNC Symbol;Acc:HGNC:23034] [ENST00000607772]	ATATCACTTTTGAATGACTCATGTGGCTACAAATGCAGCAATCTGTGGTTATCATGGACC	chr6	154708736	154708795	-	FALSE	hs|6q25.2	ENST00000607772	154043	NA	CNKSR family member 3	GO:0005737|GO:0016020|GO:0033137|GO:0010765|GO:0070373	NA	THC2660361
LTBP4	0.000170025	3.73434	11.959	11.8605	12.3099	11.2134	11.9523	11.6642	8.78904	9.12848	8.58551	9.27303	9.6529	10.3493	11.055	10.7661	Homo sapiens latent transforming growth factor beta binding protein 4 (LTBP4), transcript variant 1, mRNA [NM_001042544]	CTGGACCTGGAGAAGGGACCTACGGACGCCTGGAAGCTGCGACGCCCTGCACTGCTCCCG	chr19	41135554	41135613	+	FALSE	hs|19q13.2	ENST00000595118	8425	NM_001042544	latent transforming growth factor beta binding protein 4	GO:0005515|GO:0050431|GO:0005509|GO:0005578|GO:0005576|GO:0007275|GO:0005539|GO:0001558|GO:0005615|GO:0031012|GO:0030162|GO:0005178|GO:0030198|GO:0006457|GO:0005024|GO:0045595|GO:0030252|GO:0007179|GO:0017015|GO:0070062	NM_001042544	THC2465117
KLHL35	0.000119764	0.235802	7.08169	7.91585	7.39269	7.11613	6.54032	7.63115	8.46357	8.51202	9.68099	8.93736	10.1828	9.17869	8.40915	10.4537	Homo sapiens kelch-like family member 35 (KLHL35), mRNA [NM_001039548]	GGGGGTCTCATGAGCAAAATCTTCACCTATGATCCAGGCACAGATGTGTGGGGGGAGGCA	chr11	75134757	75134816	-	FALSE	hs|11q13.4	ENST00000460787	283212	NM_001039548	kelch-like family member 35	NA	NM_001039548	THC2602242
B3GAT1	0.000464098	0.314469	8.85288	10.2108	9.0664	8.68299	9.26082	8.60417	9.52001	11.1704	11.1018	10.856	11.6077	9.9418	10.7345	11.2007	Homo sapiens beta-1,3-glucuronyltransferase 1 (B3GAT1), transcript variant 2, mRNA [NM_054025]	ACTTCTTTGGGCAGATGCTAGGTCAGTTGTTTTCACCTAATATCCTCTTTTAGCTGCATG	chr11	134248694	134248753	-	FALSE	hs|11q25	ENST00000312527	27087	NM_054025	beta-1,3-glucuronyltransferase 1	GO:0015018|GO:0000139|GO:0008499|GO:0005975|GO:0009405|GO:0006486|GO:0044281|GO:0016021|GO:0030204|GO:0030203|GO:0046872	NM_054025	THC2470938
TNFSF13	0.000214457	3.32736	8.0616	7.70784	7.38133	7.07058	7.45838	6.84255	4.23641	4.96835	5.66804	4.63255	5.93109	6.179	6.46044	6.33338	Homo sapiens tumor necrosis factor (ligand) superfamily, member 13 (TNFSF13), transcript variant gamma, mRNA [NM_172088]	ATCTGCTGTATAGCCAGGTCCTGTTTCAAGACGTGACTTTCACCATGGGTCAGGTGGTGT	chr17	7463468	7463709	+	FALSE	hs|17p13.1	ENST00000396542	8741	NM_172088	tumor necrosis factor (ligand) superfamily, member 13	GO:0005164|GO:0010467|GO:0008284|GO:0002426|GO:0048298|GO:0005102|GO:0005125|GO:0005615|GO:0005829|GO:0007165|GO:0005737|GO:0002636|GO:0005654|GO:0009897|GO:0070062	NM_172088	THC2761569
CTTTGTTCCTTTGGCCACATACAAGCAAATCTATAAGAAAGGCCATATTATAGACATCAA	0.000660256	0.047948	6.99552	7.12862	6.42872	7.81885	6.5596	7.05618	11.6886	12.5231	11.8833	11.6841	7.1753	11.5985	11.3555	8.30815	chr2	31514059	31514116	+	FALSE	hs|2p23.1	ENST00000327215	NA	NA	NA	NA	NA	NA	NA	NA
LOC101927958	0.0135668	0.483531	3.65358	3.99347	4.17818	5.3708	3.64508	4.04859	5.7271	5.44956	5.86213	5.5994	3.93391	4.82096	5.75198	4.46015	PREDICTED: Homo sapiens uncharacterized LOC101927958 (LOC101927958), ncRNA [XR_431549]	TCACAGAGAATGTCCTTCATGACCACATCCTAGTTCCCAGAACCTGCGAATATGCTACTT	chr2	239144735	239144794	+	FALSE	hs|2q37.3	NA	101927958	XR_431549	uncharacterized LOC101927958	NA	XR_431549	THC2605738
transcription elongation factor A (SII), 1 pseudogene 4 [Source:HGNC Symbol;Acc:HGNC:31091] [ENST00000415066]	0.0109937	0.382234	5.5935	4.89738	5.89111	4.95343	5.30735	5.57443	6.73587	6.45648	6.71167	6.72737	5.75317	8.36685	6.00399	5.2639	GTGGAACCCAGAGTGGCTTGTTCACATGTGCAAATGTAGTGCTGATGGACTGATAACATT	chr9	32979596	32979655	-	FALSE	hs|9p21.1	ENST00000415066	NA	NA	NA	NA	NA	NA	NA
ribosomal protein S10 pseudogene 27 [Source:HGNC Symbol;Acc:HGNC:36850] [ENST00000586795]	0.00171352	0.36092	12.5172	12.7211	12.4565	13.1414	12.3172	12.5937	13.9231	14.9404	14.4256	13.9813	12.5764	14.5968	14.1431	13.0186	GGCTGAGGAACCTGCAAGACTCACAAGAGGGGAAGTCAATAGAGTTACCTACAGACAGAG	chr18	21252324	21252383	-	FALSE	hs|18q11.2	ENST00000586795	NA	NA	NA	NA	NA	NA	NA
HIST1H1A	0.000182671	7.74393	8.02437	7.03214	6.69181	6.20612	8.93412	7.07104	3.71679	3.48122	4.69564	3.22798	4.69096	6.01253	5.2824	4.03042	Homo sapiens histone cluster 1, H1a (HIST1H1A), mRNA [NM_005325]	CTGCTAAAGCTAAGGCTGTAAAACCCAAGGCGGCCAAGGCTAGGGTGACGAAGCCAAAGA	chr6	26017351	26017410	-	FALSE	hs|6p22.2	ENST00000244573	3024	NM_005325	histone cluster 1, H1a	GO:0005515|GO:0000790|GO:0005719|GO:0006334|GO:0007283|GO:0000786|GO:0031490	NM_005325	THC2484132
MYADM	0.00128508	0.297565	6.94549	7.13901	7.19829	6.77245	7.28225	6.96266	9.42551	8.75559	8.4594	8.77245	7.16206	9.35281	9.45731	7.48335	Homo sapiens myeloid-associated differentiation marker (MYADM), transcript variant 1, mRNA [NM_001020818]	AATTCCTTGCACTCTAACCAGTTCTTGGATGCATCTTCTTCCTTCCCTTTCCTCTTGCTG	chr19	54377897	54377956	+	FALSE	hs|19q13.42	ENST00000391771	91663	NM_001020818	myeloid-associated differentiation marker	GO:0031579|GO:0030335|GO:0005886|GO:0072661|GO:0010810|GO:0001726|GO:0045217|GO:0003674|GO:0090038|GO:1900026|GO:0061028|GO:0005911|GO:0010629|GO:0030837|GO:0034115|GO:0001933|GO:0045121|GO:0016021|GO:0030864|GO:0070062	NM_001020818	THC2480965
ALU1_HUMAN (P39188) Alu subfamily J sequence contamination warning entry, partial (13%) [THC2725167]	0.0306831	0.379007	7.90558	7.84285	7.49815	7.49178	7.73457	7.75242	7.75909	10.4217	8.78098	9.73836	8.84575	6.77314	9.00762	8.85092	GCTCTTTAGCAGGCTTAAAGTCCTCTTTTTAGATCAATTATCATCTGAGAAAATGTGTTC	chr7	128460899	128460958	+	FALSE	hs|7q32.1	NA	NA	NA	NA	NA	NA	THC2725167	NA
RGP1	0.000298285	0.495629	5.93931	6.46685	6.87338	6.71532	6.66225	6.41695	7.06542	8.18718	7.28547	7.38368	7.5025	7.59878	7.02913	7.96153	Homo sapiens RGP1 retrograde golgi transport homolog (S. cerevisiae) (RGP1), mRNA [NM_001080496]	CGGGCTTTCAGCTATAGCATTAATTTATTTGTTCAGAATACATTGGCAGCTGCTAGTGGT	chr9	35752982	35753041	+	FALSE	hs|9p13.3	ENST00000378078	9827	NM_001080496	RGP1 retrograde golgi transport homolog (S. cerevisiae)	GO:0005515|GO:0043234|GO:0017112|GO:0017137|GO:0016020|GO:0034066|GO:0042147|GO:0032851|GO:0005829	NM_001080496	THC2474786
TGM4	0.00114429	0.157838	2.39127	1.5864	1.57042	3.51479	3.60399	3.43164	5.0039	4.76461	4.65544	4.55546	3.52691	7.52804	5.1576	5.50516	Homo sapiens transglutaminase 4 (TGM4), mRNA [NM_003241]	ACGTGAAAACTGGAAACCACATCCTTAAGTCTGAAGAAAACATCCTATACCTTCTCTTCA	chr3	44932150	44932209	+	FALSE	hs|3p21.31	ENST00000495844	7047	NM_003241	transglutaminase 4	GO:0031012|GO:0005737|GO:0018149|GO:0005794|GO:0003810|GO:0046872|GO:0070062|GO:0042628	NM_003241	THC2504423
CCDC108	0.0265161	0.422934	12.0794	12.2096	12.0471	12.3979	12.1282	12.242	13.832	13.7194	13.2571	13.3874	11.117	14.0587	13.9328	12.233	Homo sapiens coiled-coil domain containing 108 (CCDC108), transcript variant 1, mRNA [NM_194302]	GCCCTGCCGCCGTTCTGCGTGCCCAGGAGTCTGACCCCGGACACGCTGCTGCCGACGCAG	chr2	219867710	219867882	-	FALSE	hs|2q35	ENST00000453220	255101	NM_194302	coiled-coil domain containing 108	GO:0016021	NM_194302	THC2477625
C1QTNF2	0.000224672	0.203741	5.76509	6.78392	6.06782	5.73868	6.08019	5.89008	8.01328	7.82726	6.03646	8.89251	8.95323	8.5995	8.83541	8.36479	Homo sapiens C1q and tumor necrosis factor related protein 2 (C1QTNF2), mRNA [NM_031908]	GGGTGACGAAGTTTGGCTGCAGATCTTCTACTCAGAGCAGAACGGGCTCTTCTATGACCC	chr5	159776245	159776304	-	FALSE	hs|5q33.3	ENST00000393975	114898	NM_031908	C1q and tumor necrosis factor related protein 2	GO:0070208|GO:0000187|GO:0005581|GO:0045725|GO:0046326|GO:0046321|GO:0005102|GO:0051260|GO:0005615|GO:0042802	NM_031908	THC2476884
Homo sapiens clone FLB2205 PRO0522 mRNA, complete cds. [AF130102]	0.00459681	0.428417	8.5485	8.26776	8.87837	8.74976	8.72164	8.73009	10.0838	10.2605	9.65231	9.84986	8.45926	10.8504	9.73211	8.89514	TCTCCTTCAGGAGCGTTTTATCCCTGCGCACGGTCTCCCGCACTCGCCGCTCCTCTTCTC	chr6	13615820	13615966	-	FALSE	hs|6p23	NA	NA	AF130102	NA	NA	NA	NA	NA
GOLGA2P7	0.00174954	2.33613	11.1967	11.1164	10.9909	11.3335	11.0062	11.3389	8.12645	10.1189	10.8081	10.1003	9.55303	10.0538	9.20382	10.2381	Homo sapiens golgin A2 pseudogene 7 (GOLGA2P7), non-coding RNA [NR_027001]	GGAGTGAGGCAAAACACAGGGTCCTGAGGTCTGGGGACCAAGCAATGTCCTCTGGTGAAA	chr15	84867675	84867734	-	FALSE	hs|15q25.2	NA	388152	NR_027001	golgin A2 pseudogene 7	NA	NR_027001	THC2471881
KANK1	1.46e-05	3.12237	11.0835	10.9971	10.9697	10.8569	10.9	10.7773	8.22105	9.46027	9.11178	9.34175	9.48328	8.8695	9.84758	9.45859	Homo sapiens KN motif and ankyrin repeat domains 1 (KANK1), transcript variant 2, mRNA [NM_153186]	GCACCTTCTGTTCACTCCCACAAAGTGGTGTCTGGTTCTCACTGAGACGTTTTAAGATTT	chr9	745523	745582	+	FALSE	hs|9p24.3	ENST00000382289	23189	NM_153186	KN motif and ankyrin repeat domains 1	GO:0005515|GO:0006355|GO:0030336|GO:0008013|GO:2000393|GO:0090303|GO:0046627|GO:0035024|GO:2000114|GO:0030177|GO:0005634|GO:0032587|GO:0035413|GO:0006351|GO:1900028|GO:0005737|GO:1900025|GO:0030837|GO:0010977	NM_153186	NP1165352
PRR22	0.00400553	2.01878	7.08353	6.69707	7.31805	6.19373	6.78633	7.53469	6.74235	6.20999	5.25855	5.10723	6.10049	5.0872	5.80774	6.56591	Homo sapiens proline rich 22 (PRR22), mRNA [NM_001134316]	CTGGACACCGTGTCCAACGTTGACTACTTCTTCAACTTCAAGGCGCTCGACGAGGAGCAG	chr19	5783163	5783222	-	FALSE	hs|19p13.3	ENST00000419421	163154	NM_001134316	proline rich 22	NA	NM_001134316	THC2477494
Q9J2I0_9GAMA (Q9J2I0) ORFRU4-R, partial (7%) [THC2649456]	0.00121236	0.273741	5.25161	4.42408	5.55061	3.98962	4.16371	4.88294	7.08918	7.17263	7.13204	7.2429	5.13879	6.19462	6.84434	4.96627	GCCATTCCCAGTGAGTTTCAAGGCTGCAAATCCTCCGGAGAGGTCCTAGATGGTCTCTCC	chr1	16175184	16175243	-	FALSE	hs|1p36.21	NA	NA	NA	NA	NA	NA	THC2649456	NA
DLGAP1-AS2	0.0104751	2.06313	5.43379	6.70326	5.20169	5.76337	6.25738	5.77312	4.48222	3.99309	5.77611	3.49638	3.47903	6.48332	4.12372	4.04748	Homo sapiens DLGAP1 antisense RNA 2 (DLGAP1-AS2), long non-coding RNA [NR_119377]	CCAACATCGTGGCTGAATGAACAGCTGGGACTATGCTTAACCCATTCCCAGCTTATAAAA	chr18	3604125	3604184	+	FALSE	hs|18p11.31	NA	84777	NR_119377	DLGAP1 antisense RNA 2	NA	NR_119377	THC2555407
IRX4	0.0033082	0.234594	9.16749	9.22675	9.46617	9.22377	9.54988	9.48228	11.791	12.0441	11.7712	11.1768	8.77447	12.0272	11.6583	9.95928	Homo sapiens iroquois homeobox 4 (IRX4), transcript variant 5, mRNA [NM_016358]	CCCTTCCCCACTCTGGCGCCCTGGACAGGCACCAGGACTCCCCGGTAACCAGTCTCAGAA	chr5	1878334	1878393	-	FALSE	hs|5p15.33	ENST00000508261	50805	NM_016358	iroquois homeobox 4	GO:0043565|GO:0007507|GO:0006355|GO:0005634|GO:0048561	NM_016358	THC2478120
PREDICTED: Homo sapiens uncharacterized LOC100996760 (LOC100996760), transcript variant X1, mRNA [XM_005276385]	0.0128199	0.290009	11.5813	11.5877	11.9573	11.6303	11.9836	11.5464	13.7037	13.6882	13.4702	13.4572	10.8267	14.7135	13.5584	11.807	CCCCTCGTGACCAGCAAACTCCTAAAAGCCGCCCTTGCCCCAGAGCCCCTGTAGCCTCCA	chr10	47769433	47769492	+	FALSE	hs|10q11.22	ENST00000610809	NA	XM_005276385	NA	NA	XM_005276385	NP1185779	NA
TGGGGGGAGCTTTCTCCTGGTGGCTTGAAGTCACATAACAGGAGGTTCATTAAATGTTAA	0.00765793	0.240117	9.55069	9.75601	10.0056	10.1954	9.95622	10.1011	11.1923	12.815	12.2906	11.9008	9.32621	13.0729	11.954	10.2218	chr1	159990516	159990575	+	FALSE	hs|1q23.2	NA	NA	NA	NA	NA	NA	NA	NA	NA
TNNI3	0.000370919	2.46622	5.47059	5.7003	6.30059	6.67991	5.81821	6.4745	4.55027	4.55482	4.91974	4.6789	4.39142	5.54173	5.13516	4.53494	Homo sapiens troponin I type 3 (cardiac) (TNNI3), mRNA [NM_000363]	CAGATCTGACTCAGAAGATCTTTGACCTTCGAGGCAAGTTTAAGCGGCCCACCCTGCGGA	chr19	55665511	55665570	-	FALSE	hs|19q13.42	ENST00000586669	7137	NM_000363	troponin I type 3 (cardiac)	GO:0005515|GO:0060047|GO:0030049|GO:0005861|GO:0055010|GO:0019901|GO:0019904|GO:0006874|GO:0001980|GO:0032780|GO:0003779|GO:0006940|GO:0060048|GO:0030017|GO:0046872|GO:0005829|GO:0007507|GO:0030172|GO:0031014|GO:0019855|GO:0001570|GO:0048306	NM_000363	THC2615488
GCGR	0.00212834	0.140294	5.38591	4.48222	4.85525	4.70501	6.59754	4.2616	5.48767	7.98774	5.33842	8.92997	8.94344	6.91965	9.11822	7.90343	Homo sapiens glucagon receptor (GCGR), mRNA [NM_000160]	GGGCAAAGTGCTATGGGAGGAGCGGAACACCAGCAACCACAGGGCCTCATCTTCGCCCGG	chr17	79771391	79771450	+	FALSE	hs|17q25.3	ENST00000400723	2642	NM_000160	glucagon receptor	GO:0005886|GO:0007584|GO:0044281|GO:0042593|GO:0006091|GO:0070873|GO:0006887|GO:0004967|GO:0043547|GO:0005085|GO:0042594|GO:0006112|GO:0009755|GO:0071377|GO:0005887|GO:0008217|GO:0007188|GO:0016021|GO:0007189|GO:0017046|GO:0005768	NM_000160	THC2477320
MT2A	0.00806321	4.97562	14.985	14.3095	15.3966	12.473	16.251	13.6418	13.1028	11.5259	10.1765	11.4996	11.4521	13.7796	13.7183	12.3979	Homo sapiens metallothionein 2A (MT2A), mRNA [NM_005953]	CGCTCCCAGATGTAAAGAACGCGACTTCCACAAACCTGGATTTTTTATGTACAACCCTGA	chr16	56643281	56643340	+	FALSE	hs|16q12.2	ENST00000562017	4502	NM_005953	metallothionein 2A	GO:0071294|GO:0005515|GO:0048471|GO:0019221|GO:0005634|GO:0035690|GO:0036016|GO:0005829|GO:0036018|GO:0005737|GO:0006878|GO:0008144|GO:0008270|GO:0045926|GO:0060333	NM_005953	THC2508419
TMEM63A	0.000508717	2.13769	6.80514	7.42169	7.3725	6.77893	7.08127	6.3414	6.32553	5.80427	5.82648	5.62435	5.0285	6.02332	6.53375	5.67506	Homo sapiens transmembrane protein 63A (TMEM63A), mRNA [NM_014698]	CTCCTGGGGATTCTGGGGAATGGGATGCAACTTAAGACTTCTGCCTGAGAAGCCTCCTCC	chr1	226033687	226033746	-	FALSE	hs|1q42.12	ENST00000366835	9725	NM_014698	transmembrane protein 63A	GO:0000166|GO:0016021|GO:0005765|GO:0070062|GO:0006811	NM_014698	THC2586917
ANGPT1	0.00113253	5.0034	8.60738	10.2868	9.61273	9.74248	9.73687	7.59242	6.66451	8.07329	7.30791	6.25371	4.9711	7.69016	7.99943	5.73414	Homo sapiens angiopoietin 1 (ANGPT1), transcript variant 1, mRNA [NM_001146]	AACCGAGCCTATTCACAGTATGACAGATTCCACATAGGAAATGAAAAGCAAAACTATAGG	chr8	108276579	108296968	-	FALSE	hs|8q23.1	ENST00000522400	284	NM_001146	angiopoietin 1	GO:0051897|GO:0005886|GO:0072012|GO:0050731|GO:0002040|GO:0050900|GO:0005615|GO:0030154|GO:0002740|GO:0043524|GO:0007171|GO:0033138|GO:0031398|GO:0070374|GO:0043122|GO:0070062|GO:0030097|GO:0030971|GO:0043066|GO:0048014|GO:0032680|GO:2000446|GO:0031589|GO:0043393|GO:0005576|GO:0014068|GO:0001701|GO:0050918|GO:0045785|GO:0010595|GO:0043536|GO:0005902|GO:0007162|GO:0007596|GO:0001936|GO:0034394|GO:…	NM_001146	THC2733026
MID1	5.82e-06	4.8068	9.75079	9.73637	9.53937	9.99438	9.25829	9.45331	6.73712	6.74101	7.55707	6.13617	7.95085	7.58919	8.12622	7.10379	Homo sapiens midline 1 (MID1), transcript variant 3, mRNA [NM_033290]	TGGGATAATGTTGGAAAGAAAGGTTCTGAATCCTTTGGCCACATTTTGCCCTGCTTCTCT	chrX	10416703	10416762	-	FALSE	hs|Xp22.2	ENST00000380782	4281	NM_033290	midline 1	GO:0051219|GO:0008017|GO:0005881|GO:0007389|GO:0046982|GO:0005875|GO:0016874|GO:0005874|GO:0019221|GO:0005819|GO:0035372|GO:0000226|GO:0032874|GO:0042803|GO:0005829|GO:0008152|GO:0007026|GO:0008270|GO:0031625|GO:0060333	NM_033290	THC2463070
KLK11	5.23e-06	42.9593	8.28022	10.1588	10.3869	10.6639	9.42115	9.64273	0.714154	1.73141	3.21141	1.9136	3.03193	4.48669	6.97093	3.18417	Homo sapiens kallikrein-related peptidase 11 (KLK11), transcript variant 2, mRNA [NM_144947]	TCCTGGACTACAGGAGATGCTGTCACTTAATAATCAACCTGGGGTTCGAAATCAGTGAGA	chr19	51525626	51525685	-	FALSE	hs|19q13.41	ENST00000319756	11012	NM_144947	kallikrein-related peptidase 11	GO:0005794|GO:0004252|GO:0006508|GO:0008236|GO:0005615|GO:0070062	NM_144947	THC2747909
RAB29	0.00236406	0.448958	7.3764	5.97628	5.77458	6.48411	6.34292	6.45755	7.77782	6.81903	7.42795	7.40439	7.47992	8.43544	7.07256	8.11705	Homo sapiens RAB29, member RAS oncogene family (RAB29), transcript variant 1, mRNA [NM_003929]	TCTGCTCCTCACAGCTTTGGGAATCTGAATGGAAGAAGAAAAGAGAGAAGTTAACAACCT	chr1	205738326	205738385	-	FALSE	hs|1q32.1	ENST00000367139	8934	NM_003929	RAB29, member RAS oncogene family	GO:0005515|GO:0005773|GO:0005802|GO:0042470|GO:0048471|GO:0005886|GO:0032438|GO:0003924|GO:0090316|GO:0005525|GO:0015031|GO:0030154|GO:0005739|GO:0006888|GO:0035526|GO:0005737|GO:0008152|GO:0007030|GO:0032482|GO:0019003|GO:0005856|GO:0070062	NM_003929	THC2653105
ADAMTSL1	2.17e-05	0.0832818	1.01355	1.65742	1.10688	3.12635	0.598837	2.44329	5.40855	5.16803	5.35334	5.19196	6.71437	5.78137	3.49426	5.36776	ADAMTS-like 1 [Source:HGNC Symbol;Acc:HGNC:14632] [ENST00000380566]	ATCCATGTAGGGGTATTTCCCATATTTTTGGAAGTAGCGGTCATTAGCAAAGTAACTAAG	chr9	18681393	18681451	+	FALSE	hs|9p22.1	ENST00000380566	92949	BC030262	ADAMTS-like 1	GO:0006493|GO:0006508|GO:0005578|GO:0005788|GO:0008270|GO:0036066|GO:0044267|GO:0008237|GO:0043687	NA	THC2489771
RR12_SPIMX (P42344) Chloroplast 30S ribosomal protein S12, partial (11%) [THC2611661]	0.000198576	2.77835	9.97399	9.62552	10.3191	9.57307	9.53876	9.16885	7.66943	8.45115	6.87316	8.30698	9.12871	7.86413	8.63779	8.20402	AGCTGTTTTCTATTAACACTGAAGTACTCTGAGAGCTTGGAAATTTTCAAGTGCAAAATC	chr11	95954892	95954951	-	FALSE	hs|11q21	NA	NA	NA	NA	NA	NA	THC2611661	NA
Homo sapiens cDNA FLJ27368 fis, clone UBA03195. [AK130878]	1.95e-05	4.53283	6.02472	6.86888	7.32345	6.16085	6.91682	6.00988	4.55155	4.51903	3.86243	3.40228	4.66474	3.71837	5.43264	4.52194	GGAGGAGTTTGGATTGGAAACACCAGTCACAAGGACAGAATGAAGCCTGAATGAAAGTCT	chr8	73975596	73975655	-	FALSE	hs|8q21.11	NA	NA	AK130878	NA	NA	NA	THC2503794	NA
CAGAGCTCCCAACCCAGCTACTATGAACCACGCTAGGCCCCAGAAAAGAAAGGAAAACAG	3.75e-05	0.277913	4.28432	4.0622	4.47483	4.46999	4.7707	4.33402	6.66994	6.48266	6.57735	6.49888	4.8084	6.32928	6.293	5.65335	chr14	88646379	88646438	+	FALSE	hs|14q31.3	ENST00000553487	NA	AL832767	NA	NA	NA	THC2579637	NA	NA
SH3PXD2A	0.00379766	0.44668	6.43393	6.33454	7.4101	6.43416	7.7138	7.37981	8.43397	8.30815	8.33888	8.74155	7.47352	7.20782	8.66082	7.92888	Homo sapiens SH3 and PX domains 2A (SH3PXD2A), mRNA [NM_014631]	ATGTTGAGTTAATCTGCTAGATTGCAGTACTAATGGTAGTGGTTTAGTGTCTTCATGTTA	chr10	105359489	105359548	-	FALSE	hs|10q24.33	ENST00000315994	9644	NM_014631	SH3 and PX domains 2A	GO:0005515|GO:0005737|GO:0030054|GO:0006801|GO:0002102|GO:0042995|GO:0035091	NM_014631	THC2492107
MUC3	0.0080526	0.0664572	7.45885	8.91124	9.15369	9.28906	9.27183	9.33759	13.709	10.6267	13.7871	13.5983	8.31615	10.6649	14.16	9.62678	Homo sapiens SIB 297 intestinal mucin (MUC3) mRNA, partial cds. [AF007192]	AGCCACTAATACGTTGTCATCCCTCACCACTAACATTTTATCTTCTACACCTGTCCCGAG	NA	NA	NA	NA	FALSE	NA	NA	100133790	AF007192	intestinal mucin-like	NA	NA	THC2669322
CD226	4.84e-07	3.81406	6.45311	6.43888	5.85085	5.79927	6.33431	6.41767	4.26608	4.16815	3.61837	4.0395	4.83405	4.84306	4.44524	3.78038	CD226 molecule [Source:HGNC Symbol;Acc:HGNC:16961] [ENST00000280200]	AACAGAGGGCAGAAGGTCTATACGTCCTGAGGCCTTTTATGCAACGTTTGTTTGTGGAAT	chr18	67520566	67520625	-	FALSE	hs|18q22.2	ENST00000280200	10666	NA	CD226 molecule	GO:0005515|GO:0008037|GO:0005886|GO:0009986|GO:0019901|GO:0033005|GO:0001816|GO:0007165|GO:0005178|GO:0005887|GO:0050776|GO:0045954|GO:0002860|GO:0045121|GO:0007155|GO:0060369|GO:0050839|GO:0002891|GO:0009897	NA	THC2663361
SHROOM3	0.015481	2.59609	10.758	11.1568	10.6976	11.0536	10.9685	10.3919	11.1571	6.13895	7.94416	7.68333	4.91683	9.95469	10.8751	4.24928	Homo sapiens shroom family member 3 (SHROOM3), mRNA [NM_020859]	AATGGAAAAGATCACTATGTTTGTTGTGCTAACCACTTATTTGATTCTGTTTTGTGGTGG	chr4	77700819	77700878	+	FALSE	hs|4q21.1	ENST00000296043	57619	NM_020859	shroom family member 3	GO:0007389|GO:0030036|GO:0008360|GO:0005874|GO:0001843|GO:0045176|GO:0000902|GO:0002066|GO:0043296|GO:0005737|GO:0016324|GO:0051015|GO:0005912|GO:0043482|GO:0005856	NM_020859	THC2463526
Homo sapiens, clone IMAGE:5742003, mRNA. [BC035740]	0.00227504	0.38437	7.9471	7.76798	8.6708	7.84835	8.44106	7.9675	9.45706	9.48328	9.22315	9.23953	8.13409	10.8757	9.28346	8.95248	CTCATCCTGCATCCCCTACCTACTTGGATGAATATTAATATTTACAATAACAGAGAAAAG	chr2	217475812	217475871	+	FALSE	hs|2q35	ENST00000441803	NA	BC035740	NA	NA	NA	THC2611732	NA
KRT18	0.00114751	4.04705	15.5425	14.3933	15.0881	13.6082	15.5123	14.2745	13.3225	12.315	12.8943	12.9718	12.9181	12.736	13.1045	12.5445	Homo sapiens keratin 18, type I (KRT18), transcript variant 1, mRNA [NM_000224]	GAGGACTTCATTCTTGGTGATGCCTTGGACAGCAGCAACTCCATGCAAACCATCCAAAAG	chr12	53346116	53346554	+	FALSE	hs|12q13.13	ENST00000388836	3875	NM_000224	keratin 18, type I	GO:0005515|GO:0005882|GO:0048471|GO:0043066|GO:0005815|GO:0045104|GO:0034451|GO:0097284|GO:0005730|GO:0097191|GO:0009653|GO:0033209|GO:0071944|GO:0005737|GO:0007049|GO:0005198|GO:0097110|GO:0016032|GO:0045095|GO:0043000|GO:0070062	NM_000224	THC2526743
MX2	0.03464	0.444408	6.46556	5.71383	5.97123	5.0715	5.54727	5.19907	7.37179	5.71964	6.16753	6.61508	6.01141	8.51158	6.28591	6.05554	Homo sapiens MX dynamin-like GTPase 2 (MX2), mRNA [NM_002463]	ACTCTCATTTTCCCAGTAATGAGTCTTCGGTTTCCTCCTTTACTGAAATAGGCATCCACC	chr21	42778849	42778908	+	FALSE	hs|21q22.3	ENST00000481838	4600	NM_002463	MX dynamin-like GTPase 2	GO:0019221|GO:0035455|GO:0003924|GO:0005634|GO:0006952|GO:0005525|GO:0009615|GO:0015031|GO:0005829|GO:0051607|GO:0005737|GO:0060337|GO:0005643|GO:0008152|GO:0051726|GO:0051028|GO:0046822	NM_002463	THC2620013
GJA3	0.000219526	0.367429	3.43904	3.76922	3.82569	4.35444	3.91791	4.32368	5.62284	6.0666	5.98666	5.46027	4.42921	5.41135	4.61092	4.89522	Homo sapiens gap junction protein, alpha 3, 46kDa (GJA3), mRNA [NM_021954]	CAAATCTTGGGTTGACTCACTTTAAGGTTTCTGACTGCCCAAAATATTTTTTCCCCTTTA	chr13	20712635	20712694	-	FALSE	hs|13q12.11	ENST00000241125	2700	NM_021954	gap junction protein, alpha 3, 46kDa	GO:0005243|GO:0007267|GO:0006810|GO:0005922|GO:0016021|GO:0055085|GO:0007601	NM_021954	THC2663354
KCNMA1	9.76e-05	0.350258	4.44842	3.695	4.51265	3.85642	3.5889	4.71309	6.38775	5.58472	5.34637	5.53497	5.6722	5.00852	5.69178	6.05424	Homo sapiens potassium channel, calcium activated large conductance subfamily M alpha, member 1 (KCNMA1), transcript variant 2, mRNA [NM_002247]	GTTCTGCAAAGCTCTGAAAACATATAATATGCTTTGTTTTGGAATTTACCGGCTGAGAGA	chr10	78649245	78649304	-	FALSE	hs|10q22.3	ENST00000404857	3778	NM_002247	potassium channel, calcium activated large conductance subfamily M alpha, member 1	GO:0005515|GO:0005886|GO:0007268|GO:0046872|GO:0016324|GO:0008076|GO:0005249|GO:0042391|GO:0034765|GO:0006813|GO:0071805|GO:0034465|GO:0070062|GO:0060072|GO:0001666|GO:0043065|GO:0030007|GO:0006970|GO:0003779|GO:0060073|GO:0045794|GO:0060083|GO:0051592|GO:0007596|GO:0005901|GO:0016021|GO:0015269	NM_002247	NP924600
SORBS1	0.00607336	2.34009	5.02129	4.66987	5.93439	4.50175	5.5935	4.23986	3.95994	3.96847	3.3728	3.55687	3.74701	4.26958	3.58139	4.39301	Homo sapiens sorbin and SH3 domain containing 1 (SORBS1), transcript variant 3, mRNA [NM_001034954]	TTGGTACTTCAAGAAGGACAAAGCAGTTTGGTACTTTTCCAGGCAACTATGTAAAACCTT	chr10	97074827	97078079	-	FALSE	hs|10q24.1	ENST00000354106	10580	NM_001034954	sorbin and SH3 domain containing 1	GO:0005515|GO:0008092|GO:0008286|GO:0005886|GO:0005158|GO:0043149|GO:0005634|GO:0016363|GO:0005829|GO:0046889|GO:0005915|GO:0005737|GO:0005913|GO:0006936|GO:0015758|GO:0048041|GO:0046326|GO:0005899|GO:0005813|GO:0001725|GO:0032869|GO:0045725|GO:0019901|GO:0003779|GO:0009967|GO:0007160|GO:0005070|GO:0045121|GO:0005654|GO:0005924|GO:0005925|GO:0090004	NM_001034954	THC2491583
CYP2B6	0.0065948	0.192067	6.69136	5.9642	6.44098	6.42249	6.69448	6.52473	8.90086	8.87717	8.5949	8.4056	6.12508	10.573	8.41977	6.61623	Homo sapiens cytochrome P450, family 2, subfamily B, polypeptide 6 (CYP2B6), mRNA [NM_000767]	CCACCACGCCTGGCTAAATTTTGTATTTTTAGGTGGTCTTGAACTCCTGATGTCAGGTGA	chr19	41523525	41523584	+	FALSE	hs|19q13.2	ENST00000597612	1555	NM_000767	cytochrome P450, family 2, subfamily B, polypeptide 6	GO:0008392|GO:0006805|GO:0005506|GO:0017144|GO:0008395|GO:0019373|GO:0044281|GO:0043231|GO:0004497|GO:0005737|GO:0019825|GO:0042738|GO:0005789|GO:0016712|GO:0042180|GO:0008202|GO:0055114|GO:0020037	NM_000767	THC2479074
GB	0.00779241	0.389008	8.76054	8.85252	8.97986	9.08864	8.90944	9.45375	10.3302	10.5753	10.9603	10.4851	8.66749	11.3158	9.93156	9.09828	GAAAGAACTGGCAATAGGCAGTATCAAGAAGGAAGATCTGGAGCTGGTAATGACCGAGAT	chr7	148334540	148334599	+	FALSE	hs|7q36.1	ENST00000392885	NA	NA	NA	NA	NA	NP1252193	NA
LY75	0.00018329	2.80031	7.8003	7.58854	6.71073	7.26636	6.81155	6.75205	6.00047	5.31281	4.51455	5.32702	5.92655	5.97264	6.49634	5.49483	Homo sapiens lymphocyte antigen 75 (LY75), mRNA [NM_002349]	TGTGGTTATCACTTTAAGTTTTGACACCTAGATTATAGTCTTAGTAATAGCATCCACTGG	chr2	160660188	160660247	-	FALSE	hs|2q24.2	ENST00000263636	4065	NM_002349	lymphocyte antigen 75	GO:0006955|GO:0006954|GO:0005887|GO:0030246|GO:0004872|GO:0070062|GO:0006897	NM_002349	THC2470974
GAAGACAGGTCTGTGAAAGCAGAAGGTCATAGTGTTTGGAATCACTTTGTGAAAATAACA	0.00365343	2.33417	8.46236	8.74916	9.65789	8.11164	8.14545	8.25376	7.07823	6.01253	7.2138	7.10089	6.99266	7.7735	8.38822	7.88389	chr3	61803666	61803725	+	FALSE	hs|3p14.2	NA	NA	NA	NA	NA	NA	THC2773362	NA	NA
Homo sapiens cDNA FLJ31803 fis, clone NT2RI2009101. [AK056365]	2.86e-06	0.211556	3.77001	3.63405	4.16257	3.04249	3.75143	3.89863	5.83541	6.58937	6.63407	6.43916	5.5734	5.27264	5.54115	5.1528	AAATGACAAAACTGAAGGTAGATCTATCAAGCCAATTGTCTGTTTATCTGTTTGTGTGGT	chr1	119573814	119573873	-	FALSE	hs|1p12	NA	NA	AK056365	NA	NA	NA	THC2533209	NA
TTATGTTAATATTGACAATTGATTTAATAGAACTGTCTTGGCTCTAAAATTGTAATTTTA	0.0220167	5.29754	5.84376	5.47229	7.51037	3.82486	8.03495	6.04546	5.02596	3.84866	3.30009	4.3951	4.01688	3.16965	5.13345	4.28944	chrX	100160970	100161029	-	FALSE	hs|Xq22.1	NA	NA	NA	NA	NA	NA	THC2714090	NA	NA
RPL27A	0.00301046	0.470268	5.52747	4.96386	5.27746	4.76914	5.25804	6.37461	6.8953	6.06595	6.24125	5.93056	7.12232	6.07527	6.41629	7.08169	Homo sapiens ribosomal protein L27a (RPL27A), mRNA [NM_000990]	TGCTGAAAAGTAATATTTTCTCTTTCGAGAGTTTTCATGGCCTTTTAAATTACACCCCCA	chr11	8711092	8711151	+	FALSE	hs|11p15.4	ENST00000314138	6157	NM_000990	ribosomal protein L27a	GO:0005515|GO:0010467|GO:0003735|GO:0019083|GO:0003723|GO:0006614|GO:0019058|GO:0006415|GO:0006412|GO:0006413|GO:0005829|GO:0006414|GO:0000184|GO:0016020|GO:0016032|GO:0022625|GO:0044267	NM_000990	THC2543015
Homo sapiens chromosome 19 open reading frame 31, mRNA (cDNA clone MGC:168625 IMAGE:9021002), complete cds. [BC137009]	0.0264791	0.499358	12.5317	12.4297	12.6843	12.6117	12.7165	12.53	13.9041	13.7305	13.5097	13.6882	11.7818	14.2475	13.9713	12.4951	GCAGGGCCTGGTCACCCCCCGCACGTGGACACCCCAGGAGCCTTGGGGACCCCCAGGGTA	chr19	4909228	4909287	-	FALSE	hs|19p13.3	NA	NA	BC137009	NA	NA	NA	NA	NA
MT1H	0.00213748	4.95908	14.1838	13.491	14.3327	12.1402	15.1809	12.9384	12.0583	10.6567	9.8852	10.8961	10.5656	12.8386	12.6568	11.5167	Homo sapiens metallothionein 1H (MT1H), mRNA [NM_005951]	TGTGCCAAGTGTGCCCACGGCTGCATCTGCAAAGGGACGTCGGAGAAGTGCAGCTGCTGT	chr16	56670790	56670849	+	FALSE	hs|16q12.2	ENST00000262499	4496	NM_005951	metallothionein 1H	GO:0071294|GO:0005515|GO:0048471|GO:0005737|GO:0008270|GO:0005634|GO:0071276|GO:0045926	NM_005951	THC2474500
AAK1	0.0028728	0.24726	7.46295	7.40156	8.03017	7.55727	7.80176	7.62592	9.36571	9.3236	9.25554	9.22354	8.0172	11.5397	8.79999	8.51387	Homo sapiens AP2 associated kinase 1 (AAK1), mRNA [NM_014911]	TCCCTGACCTCTTGCCTATGACAGATCCTTTTGGTAGCACTTCTGATGCTGTAATTGGTA	chr2	69709843	69709899	-	FALSE	hs|2p13.3	ENST00000406297	22848	NM_014911	AP2 associated kinase 1	GO:0045747|GO:0005515|GO:0035612|GO:0030136|GO:0050821|GO:0005112|GO:0005524|GO:0006897|GO:0032880|GO:0005905|GO:0046777|GO:0004674|GO:0043195|GO:2000369|GO:0006468|GO:0031252|GO:0019897	NM_014911	THC2470881
CSGALNACT1	0.00509715	0.41848	4.46727	4.68816	5.31196	6.17825	5.35385	5.88272	7.35615	5.2877	6.57521	6.94635	7.19941	6.63766	6.63745	5.91925	Homo sapiens chondroitin sulfate N-acetylgalactosaminyltransferase 1 (CSGALNACT1), transcript variant 2, mRNA [NM_018371]	GAAGAAGGTATTTTATCCAGTTCTTTTCAGTCAGTACAATCCTGGCATAATATACGGCCA	chr8	19276201	19276260	-	FALSE	hs|8p21.3	ENST00000522854	55790	NM_018371	chondroitin sulfate N-acetylgalactosaminyltransferase 1	GO:0008037|GO:0051216|GO:0008283|GO:0044281|GO:0015014|GO:0009653|GO:0046872|GO:0005622|GO:0030206|GO:0030198|GO:0032580|GO:0030204|GO:0047238|GO:0030203|GO:0047237|GO:0050653|GO:0008955|GO:0050650|GO:0050651|GO:0005975|GO:0019276|GO:0015020|GO:0008376|GO:0007399|GO:0030166|GO:0001958|GO:0030173|GO:0000139|GO:0009405|GO:0046398|GO:0030210	NM_018371	THC2486893
PREDICTED: Homo sapiens uncharacterized LOC100505570 (LOC100505570), ncRNA [XR_109052]	0.00389997	0.494765	4.51099	4.51968	4.73595	4.49834	4.18751	4.22207	5.6282	5.44053	5.28696	5.56435	4.37945	6.48306	5.26541	4.77603	TTTCGCCCCCATTTTGTGAGGTTTAGTGTATTCTTAAAGTTTCCTGGGTTTTGATGAGAG	chr11	1683856	1683915	-	FALSE	hs|11p15.5	ENST00000415865	NA	XR_109052	NA	NA	XR_109052	THC2618231	NA
Homo sapiens cDNA FLJ20413 fis, clone KAT02170. [AK000420]	0.0148314	0.454191	12.6086	12.0423	12.491	11.7463	11.8353	12.1848	13.934	13.4749	13.319	13.7837	11.9097	13.0194	13.8797	11.7782	TGGGAGAAAATGTCTGCAAACTATGCATCTGACAAAGGCCTAATATCCAGCATCTATAGG	chr5	600459	600518	-	FALSE	hs|5p15.33	NA	NA	AK000420	NA	NA	NA	THC2485875	NA
PRR3	0.00399066	0.284564	9.5106	9.58729	9.23491	10.2362	9.64943	9.68999	12.0818	11.9371	11.0003	10.8185	9.18672	12.4177	11.8105	10.4238	Homo sapiens proline rich 3 (PRR3), transcript variant 1, mRNA [NM_025263]	AAATCCGACCGCCCTGTCTGCCGACATTTTGCCAAAAAGGGCCACTGTCGATATGAGGAC	chr6	30530168	30530227	+	FALSE	hs|6p21.33	ENST00000464396	80742	NM_025263	proline rich 3	GO:0046872	NM_025263	THC2611804
TSPAN12	0.00284982	2.76441	8.19138	8.2796	8.60142	9.28452	8.87076	9.03958	6.16514	7.32293	6.51348	6.26673	4.91493	7.77927	9.06205	6.20975	Homo sapiens tetraspanin 12 (TSPAN12), mRNA [NM_012338]	AGTGCATTTTACTGTATTTTGTGTATTTTGTTTATTTCTCAGAATATGGAAAGAAAATTA	chr7	120427406	120427465	-	FALSE	hs|7q31.31	ENST00000222747	23554	NM_012338	tetraspanin 12	GO:0042813|GO:0016020|GO:0005887|GO:0045765|GO:0010842|GO:0016021|GO:0001525|GO:0007166	NM_012338	THC2463083
AAGAAGGGACAGTTACACAGTAATTGGGAAAACTTCTGCAAGGACAGATGTGCATTTCTC	0.00134625	2.0976	10.2306	9.78972	10.1881	9.75969	9.33366	9.57517	9.14048	9.17406	8.70509	9.00266	9.19024	7.28482	8.57259	8.32555	chr12	31723660	31723719	-	FALSE	hs|12p11.21	NA	NA	NA	NA	NA	NA	THC2728305	NA	NA
TYRO3	0.0365248	2.26344	6.35624	4.85341	4.54553	3.82569	4.5956	5.2222	3.30009	3.93933	4.15329	3.36528	3.23216	1.07589	4.70281	5.03531	TYRO3 protein tyrosine kinase [Source:HGNC Symbol;Acc:HGNC:12446] [ENST00000263798]	CTGTTCATCCCAATTACATGTGCCAGTGTCACTGCTACACTAATTGAATTACTATAAATG	chr15	41875711	41875770	+	FALSE	hs|15q15.1	ENST00000263798	7301	NA	TYRO3 protein tyrosine kinase	GO:0005515|GO:0034122|GO:0060068|GO:0005634|GO:0042698|GO:0007283|GO:0005635|GO:0043524|GO:0046777|GO:0034446|GO:0001779|GO:0007155|GO:0045824|GO:0023014|GO:0046982|GO:0030168|GO:0043277|GO:0018108|GO:0005524|GO:0014065|GO:0070527|GO:0007165|GO:0005887|GO:0050728|GO:0005789|GO:0043491|GO:0051250|GO:0004713|GO:0021885|GO:0070050|GO:0004714|GO:0032940|GO:0004716|GO:0043548	NA	THC2727164
TPRG1	0.0147035	2.03165	4.18714	3.69223	4.0012	3.66908	4.4299	3.35836	1.81616	0.801653	1.28116	0.674158	4.42542	4.25806	2.84367	1.62366	Homo sapiens tumor protein p63 regulated 1 (TPRG1), mRNA [NM_198485]	GAGAGTCTTTTTGGTACCATAAGCATATCATCCACAGATACGTCACTTTGAAAATTCCAG	chr3	189038608	189038667	+	FALSE	hs|3q28	ENST00000433971	285386	NM_198485	tumor protein p63 regulated 1	GO:0005737	NM_198485	THC2473459
TBX2	0.00779869	0.457226	10.0332	10.2299	9.46717	8.6976	9.81807	8.69391	10.7221	10.0539	9.50056	10.9647	10.7528	11.4633	11.0892	10.5215	Homo sapiens T-box 2 (TBX2), mRNA [NM_005994]	GGGCCTAGACCGCGTGATAAAACTGGGTTGAGGGATGCTGGAACCAGTTACGACTGAAGT	chr17	59486256	59486315	+	FALSE	hs|17q23.2	ENST00000477081	6909	NM_005994	T-box 2	GO:0005515|GO:0060045|GO:0008284|GO:0060596|GO:0005634|GO:0048596|GO:0060021|GO:0005667|GO:0007569|GO:0035909|GO:0003203|GO:0007521|GO:0000122|GO:0000978|GO:0003677|GO:0060560|GO:0006351|GO:0003151|GO:0043565|GO:0048738|GO:0001078|GO:0060465|GO:0003148|GO:0045892|GO:0042733|GO:0090398|GO:0003256	NM_005994	THC2462208
Homo sapiens mRNA; cDNA DKFZp434P2126 (from clone DKFZp434P2126) [AL137389]	0.00558722	3.46203	5.76538	6.52904	5.01446	3.57849	5.40768	5.03249	4.80623	4.15942	2.10718	2.08614	4.44089	2.77768	3.42974	3.13158	ACTCAGTCACAACTAAGCTTCTATCCAGACACTGATGATACTGTAACTGTTTTGTTGTGC	chr21	10916750	10916809	-	FALSE	hs|21p11.1	NA	NA	AL137389	NA	NA	NA	THC2623354	NA
NPBWR2	0.00306138	0.257258	4.97249	4.8465	5.43078	5.564	5.65153	5.69149	7.60511	7.69313	7.71753	7.40025	5.06465	8.28826	7.03822	5.65467	Homo sapiens neuropeptides B/W receptor 2 (NPBWR2), mRNA [NM_005286]	CCTCCCCACGATGGGTGCCAACGTCTCTCAGGACAATGGCACTGGCCACAATGCCACCTT	chr20	62738075	62738134	-	FALSE	hs|20q13.33	ENST00000612646	2832	NM_005286	neuropeptides B/W receptor 2	GO:0005515|GO:0043005|GO:0005886|GO:0007268|GO:0038003|GO:0008188|GO:0004985|GO:0007186|GO:0042923|GO:0005887|GO:0007187|GO:0007218|GO:0016021	NM_005286	THC2602825
TACC2	3.58e-05	6.53106	2.53738	3.29342	4.19433	3.41166	3.49842	3.37652	0.678999	0.692349	0.697293	0.654335	0.70232	0.839852	1.08361	0.655882	transforming, acidic coiled-coil containing protein 2 [Source:HGNC Symbol;Acc:HGNC:11523] [ENST00000492689]	AGGAGTGTATCATGACAGGCCTTAAGGGAAGCAAATGAGCAGGAACTCTGTGGAACAAAA	chr10	123811126	123811185	+	FALSE	hs|10q26.13	ENST00000492689	10579	BC010219	transforming, acidic coiled-coil containing protein 2	GO:0021987|GO:0005815|GO:0008283|GO:0019904|GO:0005730|GO:0035257|GO:0032886|GO:0000226|GO:0030953|GO:0005634|GO:0005737|GO:0015630|GO:0022027|GO:0005654|GO:0022008	NA	NP705663
RAPGEF3	0.000361431	0.332512	6.44887	7.43158	7.18366	6.68604	7.06036	7.41173	7.62991	8.6411	9.00612	8.34147	9.26709	7.58898	8.25261	9.46527	Homo sapiens Rap guanine nucleotide exchange factor (GEF) 3 (RAPGEF3), transcript variant 2, mRNA [NM_006105]	AGACATGACCTTCATTCATGAGGGAAACCACACACTAGTGGAGAATCTCATCAACTTTGA	chr12	48132480	48132927	-	FALSE	hs|12q13.11	ENST00000490387	10411	NM_006105	Rap guanine nucleotide exchange factor (GEF) 3	GO:0005515|GO:0045859|GO:0008603|GO:0005886|GO:0008283|GO:0044281|GO:0032854|GO:0005085|GO:2000249|GO:0030552|GO:0061028|GO:0017034|GO:0070062|GO:0005952|GO:0032486|GO:0030168|GO:0001525|GO:0045766|GO:0012505|GO:0007165|GO:0006112|GO:0016020|GO:0050796|GO:0007596|GO:0019933|GO:0051496|GO:0071320|GO:0030822	NM_006105	THC2782028
601238109F1 NIH_MGC_44 Homo sapiens cDNA clone IMAGE:3609890 5', mRNA sequence [BE379139]	0.000586553	0.215963	7.89192	8.31202	8.35355	8.20784	8.53895	8.20065	10.9554	11.0589	10.3703	10.4542	8.45157	11.0586	10.5997	8.98289	CAGTGATTCCCACCCCTGTCACCCCTGAAGCAGCGAGGGTGTGCATTTGAAATGCTTGCA	chr14	105285674	105285733	+	FALSE	hs|14q32.33	NA	NA	BE379139	NA	NA	NA	THC2673123	NA
MLLT1	0.000194487	0.452028	7.78363	7.50544	8.24467	7.75644	7.89934	7.96133	9.08743	8.95644	9.2209	9.11921	7.78576	9.23229	9.29851	9.00108	Homo sapiens myeloid/lymphoid or mixed-lineage leukemia (trithorax homolog, Drosophila); translocated to, 1 (MLLT1), mRNA [NM_005934]	TTCAATGTCACCAACACCACCTTCGACTTCGACCTCTTCTCCCTGGACGAGACCACCGTG	chr19	6213092	6213151	-	FALSE	hs|19p13.3	ENST00000252674	4298	NM_005934	myeloid/lymphoid or mixed-lineage leukemia (trithorax homolog, Drosophila); translocated to, 1	GO:0005515|GO:0006355|GO:0005737|GO:0006366|GO:0005730|GO:0005654|GO:0005634|GO:0006469|GO:0008023|GO:0003677	NM_005934	THC2479049
FZD2	0.00109348	3.20608	7.99384	7.66528	6.17234	6.96682	7.64189	6.50454	4.99643	5.15224	4.70923	5.17084	4.91078	6.88991	6.33295	5.10073	Homo sapiens frizzled class receptor 2 (FZD2), mRNA [NM_001466]	CACGGTCTACATGATCAAATACCTCATGACGCTCATCGTGGGCATCACGTCGGGCTTCTG	chr17	42636610	42636669	+	FALSE	hs|17q21.31	ENST00000315323	2535	NM_001466	frizzled class receptor 2	GO:0017147|GO:0007608|GO:0005886|GO:0090263|GO:0007267|GO:0005737|GO:0051091|GO:0030182|GO:0030855|GO:0090103|GO:0060070|GO:0060022|GO:0042813|GO:0003150|GO:0004930|GO:0090179|GO:0060119|GO:0030165|GO:0003151|GO:0007186|GO:0003149|GO:0030825|GO:0016021|GO:0045893|GO:0005925|GO:0030669|GO:0035567	NM_001466	THC2472975
SPHK1	0.00171372	2.42743	8.48751	7.75783	7.48863	7.84649	8.66267	7.171	6.58002	5.97171	5.85994	6.4888	6.54303	7.66268	7.31047	6.35624	Homo sapiens sphingosine kinase 1 (SPHK1), transcript variant 1, mRNA [NM_021972]	CACAGCTCCTGTGGGGGTGGAGGAGACTCCTCTGGAGAAGGGTGAGAAGGTGGAGGCTAT	chr17	74383741	74383800	+	FALSE	hs|17q25.1	ENST00000323374	8877	NM_021972	sphingosine kinase 1	GO:0005515|GO:0005516|GO:0070301|GO:0019722|GO:0030307|GO:0014075|GO:0017050|GO:0006457|GO:0031398|GO:0032026|GO:0033198|GO:0007565|GO:0000287|GO:0030335|GO:0010803|GO:0045931|GO:0003951|GO:0007420|GO:0010976|GO:0032570|GO:0051084|GO:0046834|GO:0001956|GO:0044267|GO:0030424|GO:0042346|GO:0005886|GO:0006670|GO:0005634|GO:0048146|GO:0044281|GO:0008481|GO:0007205|GO:0005829|GO:0035556|GO:0005737|GO:…	NM_021972	THC2474958
ASTN2	0.00285333	0.293419	9.67174	9.21628	9.36304	9.36441	9.66237	9.45922	11.943	11.6819	11.2899	11.2908	9.11921	11.442	11.4561	9.80986	Homo sapiens astrotactin 2 (ASTN2), transcript variant 4, mRNA [NM_198188]	TGTGGTCTCCTTGGAGTGGGTGGATGTTCAGCCAGCTATTGGGACCAAGGTCTCCGACTA	chr9	119380656	119380715	-	FALSE	hs|9q33.1	ENST00000361477	23245	NM_198188	astrotactin 2	GO:0016021|GO:0060187|GO:2000009|GO:0005768	NM_198188	THC2766006
PRRT3	1.76e-05	3.05994	11.6971	11.8554	12.0734	11.823	11.9418	11.9649	9.50397	9.35042	10.5198	10.2419	10.6486	10.7187	10.4286	10.2847	Homo sapiens proline-rich transmembrane protein 3 (PRRT3), mRNA [NM_207351]	CCAACGTGGAGTGATGAGCCTCGCTTGTCTAGATTGTCCTCTTTGTGCCAAAGAAATAAA	chr3	9987240	9987299	-	FALSE	hs|3p25.3	ENST00000412055	285368	NM_207351	proline-rich transmembrane protein 3	GO:0016021	NM_207351	THC2474217
IL17RE	0.00305998	0.359753	7.62903	7.91744	8.33771	7.2629	7.70176	7.71666	9.69916	9.59463	9.51601	9.38001	7.43674	9.5095	9.62983	7.97699	Homo sapiens interleukin 17 receptor E (IL17RE), transcript variant 5, mRNA [NM_153483]	GCGGTCTTCCCACTTCCTCTCCAGAACTCCAGAAAGAGCAGTGTGCTTATGCTTCAGTCC	chr3	9957731	9957790	+	FALSE	hs|3p25.3	ENST00000434065	132014	NM_153483	interleukin 17 receptor E	GO:0005515|GO:0030368|GO:0005737|GO:0006954|GO:0005887|GO:0019221|GO:0005576	NM_153483	THC2478460
ATTTTAAACCCTTCTTAGGAAGTGGACATTGTGACATGGGAAAAGAAAAAGCTATAAACC	0.00579367	0.455458	8.04644	7.3764	6.98681	6.77679	7.13137	6.00862	7.76457	7.94476	9.26888	8.20029	8.56304	8.19711	7.74015	8.18601	chr21	32491359	32491418	+	FALSE	hs|21q22.11	NA	NA	NA	NA	NA	NA	NA	NA	NA
AGGTTTTAGCTTCGTGGGCAACTTTGTCTGATTTTCTTCCATTGACATAAAAATAGTCTC	0.000325208	2.31501	4.83064	5.02165	5.54337	5.31117	4.8913	4.66002	4.06062	3.88018	3.38737	4.46149	2.8698	3.0066	4.12199	4.30844	chr2	205700820	205700879	+	FALSE	hs|2q33.3	NA	NA	NA	NA	NA	NA	NA	NA	NA
DDX58	0.0061938	0.46127	8.95056	8.69295	8.43709	9.37805	8.15225	9.12959	10.2116	9.4233	9.53087	9.93924	9.98589	11.1222	8.76271	9.49543	Homo sapiens DEAD (Asp-Glu-Ala-Asp) box polypeptide 58 (DDX58), mRNA [NM_014314]	TGAGTGGAGAAGAAACAAACATAGTGGGTATAATCATGGATCGCTTGTACCCCTGTGAAA	chr9	32457019	32457078	-	FALSE	hs|9p21.1	ENST00000379883	23586	NM_014314	DEAD (Asp-Glu-Ala-Asp) box polypeptide 58	GO:0005515|GO:0003725|GO:0003727|GO:0015629|GO:0042993|GO:0005829|GO:0042802|GO:0051091|GO:0005737|GO:0003690|GO:0045944|GO:0009597|GO:0016032|GO:0032480|GO:0030334|GO:0032728|GO:0034344|GO:0032727|GO:0004386|GO:0032587|GO:0009615|GO:0005524|GO:0039529|GO:0045087|GO:0002230|GO:0039528|GO:0008152|GO:0008270|GO:0005923|GO:0043330	NM_014314	THC2619788
LHX1	0.00846532	0.41196	8.69453	8.43437	8.53591	8.41212	8.33092	8.41799	10.0139	9.98158	9.64481	9.70454	8.05453	10.7183	9.82913	8.54503	Homo sapiens LIM homeobox 1 (LHX1), mRNA [NM_005568]	CTGCCCGGGCCTCTGCACTCCATGTCGGCCGAGGTCTTCGGACCCAGCCCGCCCTTCTCG	chr17	35300288	35300347	+	FALSE	hs|17q12	ENST00000614239	3975	NM_005568	LIM homeobox 1	GO:0010468|GO:0001657|GO:0007389|GO:0001658|GO:0003700|GO:0006366|GO:0001655|GO:0048793|GO:0048703|GO:0009791|GO:0072077|GO:0009653|GO:0009880|GO:0072278|GO:0035846|GO:0035847|GO:0048646|GO:0072177|GO:0072178|GO:0009887|GO:0035849|GO:0001705|GO:0001706|GO:0003714|GO:0021937|GO:0010842|GO:0021549|GO:0072049|GO:0001702|GO:0021871|GO:2000768|GO:0043234|GO:0008045|GO:0072284|GO:0072283|GO:0035852|GO:…	NM_005568	THC2473958
PRKAG2	0.0188646	0.347414	6.46044	6.15546	5.24855	5.0244	4.71595	4.9624	8.4022	6.56902	6.20948	7.42488	7.60423	4.58749	6.67505	6.68604	protein kinase, AMP-activated, gamma 2 non-catalytic subunit [Source:HGNC Symbol;Acc:HGNC:9386] [ENST00000481434]	CCATAAATCACAGGCTGAGGGAGAAATGGTGAGGGCACAATAGCAAATGGAAATACACAA	chr7	151372312	151372371	-	FALSE	hs|7q36.1	ENST00000481434	51422	AK074675	protein kinase, AMP-activated, gamma 2 non-catalytic subunit	GO:0008286|GO:0004679|GO:0008603|GO:0071901|GO:0044281|GO:0005615|GO:0005829|GO:0035556|GO:0006754|GO:0046324|GO:0045860|GO:0061024|GO:0006633|GO:0007050|GO:0044255|GO:0010800|GO:0006996|GO:0031588|GO:0016208|GO:0019901|GO:0006853|GO:0005977|GO:0046320|GO:0030295|GO:0019217|GO:0005524|GO:0006110|GO:0006112|GO:0043531|GO:0042304|GO:0016126|GO:0006468|GO:0005654|GO:0006469|GO:0004862|GO:0007005|GO:…	NA	THC2475998
HPGD	0.00166558	46.8842	2.94995	8.21158	6.39615	5.9195	7.7444	4.44027	0.874764	0.898941	0.929823	0.974346	0.936972	2.25601	1.75515	0.885402	Homo sapiens hydroxyprostaglandin dehydrogenase 15-(NAD) (HPGD), transcript variant 1, mRNA [NM_000860]	AGACAAAGTAGTGAACATCAATGAACATCTGATAGAGATAAACTGTAATCAGGCATAAGC	chr4	175411686	175411745	-	FALSE	hs|4q34.1	ENST00000296522	3248	NM_000860	hydroxyprostaglandin dehydrogenase 15-(NAD)	GO:0019369|GO:0019371|GO:0007565|GO:0006693|GO:0007567|GO:0019372|GO:0070403|GO:0044281|GO:0045786|GO:0003824|GO:0004957|GO:0042803|GO:0005829|GO:0016323|GO:0051287|GO:0070493|GO:0007179|GO:2001300|GO:0097070|GO:0030728|GO:0070062|GO:0055114|GO:0016404	NM_000860	THC2623240
SLC52A1	0.0122069	0.48065	5.75173	5.78351	5.63438	5.96057	6.24393	6.50044	7.67534	7.20464	7.14093	7.1219	5.34421	7.54175	7.16957	6.14862	Homo sapiens solute carrier family 52 (riboflavin transporter), member 1 (SLC52A1), transcript variant 2, mRNA [NM_017986]	TTCCCCCAACACAGGAACGCTCATGGACACCTGCACACTCCACAGAAGACGTTGGCATGT	chr17	4936105	4936164	-	FALSE	hs|17p13.2	ENST00000575919	55065	NM_017986	solute carrier family 52 (riboflavin transporter), member 1	GO:0032217|GO:0005887|GO:0001618|GO:0032218|GO:0009615	NM_017986	THC2509645
ADAMTSL1	0.000943127	0.295021	4.63397	6.0722	5.13909	6.1012	5.86019	5.75173	7.41755	6.54172	7.34991	6.77361	8.89271	7.19721	6.20322	7.31706	Homo sapiens ADAMTS-like 1 (ADAMTSL1), transcript variant 2, mRNA [NM_052866]	AAGGAGCTGCTGTGTCAGAGGAGCCCTCGTAAGTTGTAAAAGCACAGACTGTTCTATATT	chr9	18684771	18684830	+	FALSE	hs|9p22.1	ENST00000327883	92949	NM_052866	ADAMTS-like 1	GO:0006493|GO:0006508|GO:0005578|GO:0005788|GO:0008270|GO:0036066|GO:0044267|GO:0008237|GO:0043687	NM_052866	THC2656548
PHF19	0.000108984	2.24688	11.3598	11.137	11.3704	10.5453	11.5668	11.4263	9.42803	9.71148	10.6005	9.7182	10.3281	10.2632	10.114	10.2787	Homo sapiens PHD finger protein 19 (PHF19), transcript variant 2, mRNA [NM_001009936]	TCCCATCACAGAGTCTGAGCTCCAAGCAGAAGGGCCACACCTGGGCTTTGGAGACAGATA	chr9	123631999	123632058	-	FALSE	hs|9q33.2	ENST00000312189	26147	NM_001009936	PHD finger protein 19	GO:0005515|GO:0010467|GO:0006355|GO:0035098|GO:0061087|GO:0045814|GO:0040029|GO:0008270|GO:0005654|GO:0035064|GO:0006351|GO:0016568	NM_001009936	THC2472002
ANO6	0.000328829	2.18498	10.1381	10.4133	9.80295	10.0302	10.7368	9.74091	9.1525	8.66406	8.93696	8.30633	9.16985	9.79439	9.38541	8.46075	Homo sapiens anoctamin 6 (ANO6), transcript variant 1, mRNA [NM_001025356]	TATGTTTGAGAGGGTAAAAATGTATGAGCAGCTTAACTGAAGTAGAACTATTCATGATGC	chr12	45825919	45825978	+	FALSE	hs|12q12	ENST00000320560	196527	NM_001025356	anoctamin 6	GO:0006821|GO:0017121|GO:0005886|GO:0017128|GO:0042803|GO:0097045|GO:0005622|GO:0044070|GO:0034220|GO:0005229|GO:0034765|GO:0005227|GO:0006812|GO:0070062|GO:0005244|GO:0009986|GO:0005247|GO:0002407|GO:0034707|GO:0002543|GO:0055085|GO:0016020|GO:0007596|GO:0006869|GO:2000353|GO:0035630	NM_001025356	THC2503577
TTATCTAGACTACAGGACATAAATTTGCTGTGTGTTCTTGCACTACCAACTTTAATAATA	0.0008607	0.283367	2.61761	2.37851	2.78658	3.34532	2.46049	1.17161	3.36486	3.69981	3.98927	5.30272	3.483	4.84189	4.14641	5.08385	chr8	222194	222253	-	FALSE	hs|8p23.3	NA	NA	NA	NA	NA	NA	THC2661413	NA	NA
HAGH	0.00919182	0.330338	11.1225	11.8014	11.0509	11.9754	12.6323	11.804	13.9999	13.8115	13.0877	13.1978	11.2742	14.3387	13.6239	11.8135	hydroxyacylglutathione hydrolase [Source:HGNC Symbol;Acc:HGNC:4805] [ENST00000397356]	CCCGCCCCAGCGCAAAGAGTTTGTTCTATTGTTCAGCAAATATTCTTAGGCCAGAATCTT	chr16	1857653	1857712	-	FALSE	hs|16p13.3	ENST00000397356	3029	NA	hydroxyacylglutathione hydrolase	GO:0005737|GO:0006750|GO:0005759|GO:0008270|GO:0004416|GO:0070062	NA	NA
BBOX1	2.31e-06	30.3484	10.5141	9.72474	8.92378	8.0887	9.39884	7.97839	3.76035	4.87066	1.67333	3.6683	2.96907	4.05809	6.09204	4.58749	Homo sapiens butyrobetaine (gamma), 2-oxoglutarate dioxygenase (gamma-butyrobetaine hydroxylase) 1 (BBOX1), mRNA [NM_003986]	TCAAGGCTTCGTATCTTAAGGCAGAGGGTGGAGAATGGAAACTGAAGTCACCTGTAGATA	chr11	27148956	27149015	+	FALSE	hs|11p14.2	ENST00000525090	8424	NM_003986	butyrobetaine (gamma), 2-oxoglutarate dioxygenase (gamma-butyrobetaine hydroxylase) 1	GO:0005739|GO:0034641|GO:0008336|GO:0005506|GO:0045329|GO:0008270|GO:0044281|GO:0070062|GO:0055114|GO:0005829	NM_003986	THC2464489
OSBPL3	0.00176779	0.457127	9.14377	9.1517	8.81899	9.09323	9.03191	8.91912	10.9346	9.7178	8.90022	10.0213	9.85953	10.0935	10.5508	10.3664	Homo sapiens oxysterol binding protein-like 3 (OSBPL3), transcript variant 1, mRNA [NM_015550]	TTTTTCAGGAAATCCGACGATGACTCTTGGGTGAGCAACGGCACCTATTTGGAACTTAGA	chr7	24839847	24843941	-	FALSE	hs|7p15.3	ENST00000396429	26031	NM_015550	oxysterol binding protein-like 3	GO:0005515|GO:0031965|GO:0016020|GO:0005886|GO:0015485|GO:0006869|GO:0097038|GO:0005829	NM_015550	THC2480505
CMTM8	0.00320873	0.450478	8.27407	8.13164	9.14721	8.22332	8.89964	8.81739	9.29204	8.32665	9.31975	9.98093	10.4477	9.8265	10.2146	9.91837	Homo sapiens CKLF-like MARVEL transmembrane domain containing 8 (CMTM8), mRNA [NM_178868]	GCTACGCTGGAAATACATATTTCAGTTTTATAGCATGGAGATCCAGGACCATACAGTGAT	chr3	32411401	32411460	+	FALSE	hs|3p22.3	ENST00000307526	152189	NM_178868	CKLF-like MARVEL transmembrane domain containing 8	GO:0005737|GO:0006935|GO:0005634|GO:0016021|GO:0005615|GO:0005125	NM_178868	THC2776034
C2CD3	0.0357142	2.49187	5.71845	3.25884	4.87877	3.28633	4.27428	5.07505	2.40811	2.6978	3.31699	2.61095	4.35363	3.40901	3.42376	3.69818	Homo sapiens C2 calcium-dependent domain containing 3 (C2CD3), transcript variant 2, mRNA [NM_015531]	AGCTCCCAACGATTCCTGAGCATGAGCAGATAGTCTCTGAAAGCATTTCCACAGATGTAT	chr11	73745546	73745605	-	FALSE	hs|11q13.4	ENST00000313663	26005	NM_015531	C2 calcium-dependent domain containing 3	GO:0005515|GO:0021997|GO:0005813|GO:0006996|GO:0005814|GO:0034451|GO:0035058|GO:0001701|GO:0036064|GO:0005829|GO:0001947|GO:0030162|GO:0007420|GO:0008589|GO:0016485|GO:0071539|GO:0021915|GO:0042733	NM_015531	THC2472034
Homo sapiens cDNA FLJ30719 fis, clone FCBBF2001718. [AK055281]	0.00486791	4.23351	7.59583	12.0334	10.4122	10.1787	9.87311	9.2221	4.4299	6.12787	8.9811	4.64629	4.29251	5.78939	10.9116	5.159	GCTTGAAGCCCACATCCTTAGATGCTGTTTCATCCAGGACCTTGGAGGAGAAAGGCATAG	chr11	125310782	125310841	-	FALSE	hs|11q24.2	NA	NA	AK055281	NA	NA	NA	THC2486250	NA
MCF2L	0.00163559	2.96791	8.24674	8.24365	8.86628	8.70696	8.48253	7.96824	4.84189	7.86957	7.75408	5.35359	7.46682	6.05501	6.6127	6.36873	Homo sapiens MCF.2 cell line derived transforming sequence-like (MCF2L), transcript variant 2, mRNA [NM_024979]	CACATGGAGCACAAACAAAATATTTGCAAAACAATGGGAAGATCATTGAAACACTGTTTG	chr13	113753629	113753688	+	FALSE	hs|13q34	ENST00000375604	23263	NM_024979	MCF.2 cell line derived transforming sequence-like	GO:0051056|GO:0048011|GO:0043065|GO:0005886|GO:0007264|GO:0007266|GO:0097190|GO:0005615|GO:0030027|GO:0005829|GO:0005545|GO:0032321|GO:0045944|GO:0005089	NM_024979	THC2503684
DGKG	0.000395347	0.451211	8.54918	8.28754	8.71917	8.48751	8.69453	8.66406	9.56514	10.4591	9.08651	9.98892	9.86556	9.00287	9.20067	9.96561	Homo sapiens diacylglycerol kinase, gamma 90kDa (DGKG), transcript variant 1, mRNA [NM_001346]	CTGCATAGCACACCTTAGATGTGGTATTTATTTTCTTAGTTCTGTGAACACCTGGGAGGG	chr3	185867099	185867158	-	FALSE	hs|3q27.2	ENST00000344484	1608	NM_001346	diacylglycerol kinase, gamma 90kDa	GO:0005886|GO:0005509|GO:0030168|GO:0005524|GO:0007205|GO:0043231|GO:0035556|GO:0007165|GO:0016310|GO:0005737|GO:0003951|GO:0048666|GO:0007596|GO:0004143	NM_001346	NP1400479
LTBP2	0.00940209	0.462627	8.93391	8.28256	8.15803	7.58376	7.99542	7.60325	9.63465	9.78031	9.41907	9.40697	7.82871	9.4617	9.5488	8.02166	Homo sapiens latent transforming growth factor beta binding protein 2 (LTBP2), mRNA [NM_000428]	GTGATGACTTGAACGGGCCTGCTGTGCTCTGTGTCCATGGTTACTGCGAGAACACAGAGG	chr14	74967661	74967720	-	FALSE	hs|14q24.3	ENST00000554861	4053	NM_000428	latent transforming growth factor beta binding protein 2	GO:0031012|GO:0005515|GO:0009306|GO:0019838|GO:0005509|GO:0005578|GO:0007179|GO:0006605|GO:0008201|GO:0005615|GO:0070062	NM_000428	THC2485117
KRTAP6-3	0.00286305	0.376262	8.45078	8.29199	8.78672	8.27056	7.9928	8.42979	10.2172	10.1548	10.0054	10.3348	8.16329	9.93817	9.72537	8.53362	Homo sapiens keratin associated protein 6-3 (KRTAP6-3), mRNA [NM_181605]	GACTGTGGCTATGGCTGTGGCTATGGCTATGTCTCCCACTCCTTCTGTGGCTGTGGCTAT	chr21	31964993	31965052	+	FALSE	hs|21q22.11	ENST00000391624	337968	NM_181605	keratin associated protein 6-3	GO:0005882	NM_181605	NP1462383
AGACTTTAAAAGTTGCAGAAGTCCTAAGAATAGCGCCAATGTAGTAGGCCCTTTTTAACA	0.00106702	4.10891	9.28603	8.97208	8.11803	8.9178	9.10079	8.93017	4.7086	5.20678	8.71445	4.82702	5.09041	7.81968	7.00015	5.63114	chr13	27261880	27261939	-	FALSE	hs|13q12.13	NA	NA	NA	NA	NA	NA	NA	NA	NA
FBLN1	0.00033891	7.61083	13.2843	13.43	13.2562	11.4561	13.6778	11.689	8.01465	7.15909	7.77328	7.63588	8.52415	11.5723	12.0409	8.30065	Homo sapiens fibulin 1 (FBLN1), transcript variant D, mRNA [NM_006486]	GGAATGGCTGGGATTTCTCGGCACTCTGCATCATCCATCTTTTCTTATAGGTGGGAAAAT	chr22	45996933	45996992	+	FALSE	hs|22q13.31	ENST00000327858	2192	NM_006486	fibulin 1	GO:0007566|GO:0005509|GO:0005578|GO:0005576|GO:0005615|GO:0005604|GO:0016504|GO:0031012|GO:0010952|GO:0030198|GO:0016032|GO:0005201|GO:0070062	NM_006486	THC2575489
SLC8B1	0.0179975	0.398024	9.90826	9.35129	9.9619	9.09867	10.0628	10.2205	12.3125	10.6884	9.3212	10.8035	10.4479	10.0721	11.9599	11.3125	Homo sapiens solute carrier family 8 (sodium/lithium/calcium exchanger), member B1 (SLC8B1), mRNA [NM_024959]	GAGACATACTTAATTTTGAATTTCTCCTTGCCACGTTAATAAAGCCAAAAGCAGCGGGTG	chr12	113736991	113737050	-	FALSE	hs|12q24.13	ENST00000550672	80024	NM_024959	solute carrier family 8 (sodium/lithium/calcium exchanger), member B1	GO:0005886|GO:0006851|GO:0051480|GO:0042593|GO:0055085|GO:0005432|GO:0042803|GO:0042383|GO:0050796|GO:0032592|GO:0051560|GO:0070588|GO:0035725|GO:0086038|GO:0086036|GO:0030061|GO:0050896|GO:0006811	NM_024959	THC2463762
SLC1A1	0.0190204	0.495974	10.4615	10.6118	9.53856	10.0557	10.0561	9.38342	11.7344	10.8705	10.337	11.7814	11.3321	9.46758	10.7004	11.2715	Homo sapiens solute carrier family 1 (neuronal/epithelial high affinity glutamate transporter, system Xag), member 1 (SLC1A1), mRNA [NM_004170]	GAAATCCAAAATAGTCATGTTTCTGCAGTATTCTGTAGCCAACTTAAACCTGTGCTTTCA	chr9	4587002	4587061	+	FALSE	hs|9p24.2	ENST00000262352	6505	NM_004170	solute carrier family 1 (neuronal/epithelial high affinity glutamate transporter, system Xag), member 1	GO:0015501|GO:0005886|GO:0051938|GO:0070779|GO:0005313|GO:0007268|GO:0055085|GO:0016324|GO:0016020|GO:0042883|GO:0005887|GO:0051260|GO:0016595|GO:0017153|GO:0070062|GO:0006811|GO:0033229	NM_004170	THC2464325
GGGACTCAGCTGTACCCCACTCAGCTTTTCTCCTGCAACAATCTCGATGAGATATGCCAG	7.6e-05	0.484628	5.78403	5.52625	5.49883	5.50235	5.21636	5.43193	6.84498	6.77138	6.68146	6.53831	5.63438	6.7852	6.5381	6.24558	NA	NA	NA	NA	FALSE	NA	NA	NA	NA	NA	NA	NA	NA	NA	NA
keratin 18 pseudogene 49 [Source:HGNC Symbol;Acc:HGNC:33419] [ENST00000427083]	0.00204229	3.39492	12.1006	10.9393	11.5492	10.1246	11.93	10.6692	10.2818	9.17905	9.64336	9.79676	9.26297	9.61473	9.68367	9.10063	ACCTGGACTCAATGAGAAATCTGAAGGCAAGCTTGGAGAGCAGCCTGAGGAAAGTGGAGG	chrX	106672353	106672412	+	FALSE	hs|Xq22.3	ENST00000427083	NA	NA	NA	NA	NA	NA	NA
Q4TBH3_TETNG (Q4TBH3) Chromosome 13 SCAF7124, whole genome shotgun sequence, partial (3%) [THC2668815]	0.0165883	3.13457	9.43807	8.27428	8.40278	6.80424	9.73356	7.46813	7.32195	4.72042	7.04002	5.73668	5.81929	8.64916	7.31193	6.07819	TTTTTCCTAGACCCGTGACCTGAGATGTGTGATTTTTAGTCATTAAATGGAAGTGTTTGC	chr9	132500630	132500689	-	FALSE	hs|9q34.11	NA	NA	NA	NA	NA	NA	THC2668815	NA
FAM83A	0.00188068	0.461815	3.12822	4.52133	4.14611	4.01688	4.03589	3.95808	5.66249	5.38433	5.01695	4.56674	4.51561	5.92143	4.60324	4.6639	Homo sapiens family with sequence similarity 83, member A (FAM83A), transcript variant 1, mRNA [NM_032899]	GAATGGTCCACTCCCAAGAAATTCAGGAAAGAAAGACTGAGGAGAAGGTGTGGGAACATT	chr8	124220354	124220413	+	FALSE	hs|8q24.13	ENST00000518448	84985	NM_032899	family with sequence similarity 83, member A	NA	NM_032899	THC2462232
BMP7	0.000512774	10.9443	8.93638	8.94911	8.85525	8.73161	8.80109	7.7735	1.28325	0.717613	1.27144	2.74911	3.92874	7.53469	6.54629	0.831391	Homo sapiens bone morphogenetic protein 7 (BMP7), mRNA [NM_001719]	GCGAAAGGAAAATTGACCCGGAAGTTCCTGTAATAAATGTCACAATAAAACGAATGAATG	chr20	55745555	55745614	-	FALSE	hs|20q13.31	ENST00000395863	655	NM_001719	bone morphogenetic protein 7	GO:0001656|GO:0005515|GO:0001657|GO:0034504|GO:0051216|GO:0005615|GO:0048596|GO:0009880|GO:0030198|GO:0007411|GO:0060548|GO:0072040|GO:0034116|GO:0032355|GO:0010664|GO:0010800|GO:0045746|GO:0030501|GO:0001707|GO:0030509|GO:0045786|GO:0005125|GO:0005160|GO:0060686|GO:0016358|GO:0060687|GO:0045839|GO:0001501|GO:0001503|GO:0070700|GO:0060272|GO:0070487|GO:0060485|GO:0045893|GO:0008083|GO:0040007|GO:…	NM_001719	THC2463991
NANOG	0.0025636	2.45764	9.93627	9.10743	9.27949	8.87255	8.42801	9.86316	8.79877	8.80018	7.57289	7.9008	7.75367	6.40378	8.10989	7.7622	Homo sapiens Nanog homeobox (NANOG), transcript variant 1, mRNA [NM_024865]	GGTTGTGCTAATCTTTGTAGAAAGAGGTCTTGTATTTGCTGCATCGTAATGACATGAGTA	chr12	7948487	7948546	+	FALSE	hs|12p13.31	ENST00000229307	79923	NM_024865	Nanog homeobox	GO:0008406|GO:0010468|GO:0008284|GO:0003700|GO:0008283|GO:0017145|GO:0001710|GO:0005634|GO:0001714|GO:0030154|GO:0009880|GO:0030514|GO:0045944|GO:0032526|GO:0035019|GO:0006355|GO:0010454|GO:0003714|GO:0005730|GO:0000122|GO:0003677|GO:0006351|GO:0045931|GO:0003682|GO:0019827|GO:0045595|GO:0005654|GO:0001158	NM_024865	THC2476017
JAKMIP1	0.0111796	0.439587	10.7175	10.3734	10.4937	10.7492	10.5448	10.4615	10.8298	12.3801	10.6527	11.6566	12.6531	10.8078	11.0188	12.3539	Homo sapiens janus kinase and microtubule interacting protein 1 (JAKMIP1), transcript variant 2, mRNA [NM_144720]	TCACCCAAGTCTATGGACATGTACCAGAGCTAATATATTTATTGCCTATGGCTTGTTTTG	chr4	6055512	6055571	-	FALSE	hs|4p16.1	ENST00000409831	152789	NM_144720	janus kinase and microtubule interacting protein 1	GO:0008017|GO:0005515|GO:0005737|GO:0050890|GO:0030529|GO:0003723|GO:0005874|GO:0050811|GO:0019894|GO:0019900|GO:0015031|GO:0019898	NM_144720	NP498568
ST8SIA4	0.000336833	0.214697	4.478	4.20575	2.7946	5.18563	4.89348	4.28103	6.71935	7.38976	6.59539	5.92623	6.07427	7.27819	6.77269	6.02005	Homo sapiens ST8 alpha-N-acetyl-neuraminide alpha-2,8-sialyltransferase 4 (ST8SIA4), transcript variant 1, mRNA [NM_005668]	CTTTTGGTTTGGATATTGGGATGCTTAGAAATCCTTTCTGAGATGCATATGAGTGAGGAA	chr5	100146950	100147009	-	FALSE	hs|5q21.1	ENST00000231461	7903	NM_005668	ST8 alpha-N-acetyl-neuraminide alpha-2,8-sialyltransferase 4	GO:0003828|GO:0009311|GO:0007399|GO:0030173|GO:0000139|GO:0007411|GO:0006491|GO:0001574|GO:0006486|GO:0033691|GO:0006488|GO:0044267|GO:0006464|GO:0043687|GO:0018279	NM_005668	THC2470882
ras-related C3 botulinum toxin substrate 1 pseudogene 7 [Source:HGNC Symbol;Acc:HGNC:42007] [ENST00000445367]	0.00212674	0.12001	6.59495	6.53785	6.42589	6.83764	6.60063	6.59072	10.1734	10.2553	10.1977	10.1683	6.29149	9.40236	9.77786	7.19227	ACTGTCTTTGACAACTGTTCTGCCAATGTTATGGTACTTGGAAAATCAGTGTATCTGGGC	chr1	234162812	234162871	-	FALSE	hs|1q42.2	ENST00000445367	NA	NA	NA	NA	NA	NA	NA
LIMS3-LOC440895	4.54e-06	11.4006	8.54078	8.90168	9.49523	9.5815	9.02545	7.4429	5.71601	5.10866	4.44027	4.91713	4.54177	5.3518	6.67968	5.61935	Homo sapiens LIMS3-LOC440895 readthrough (LIMS3-LOC440895), long non-coding RNA [NR_027145]	AAAGACTCAATAGATTTGCTTTTGATGAAACAACAACACTTCCATACAGTGAACGCCATA	chr2	110725836	110725895	+	FALSE	hs|2q13	ENST00000483717	100271835	NR_027145	LIMS3-LOC440895 readthrough	NA	NR_027145	THC2617245
LOC643733	0.0376354	0.374593	6.55248	6.92764	5.60977	8.33547	6.2269	6.49912	8.44223	7.35693	6.55091	7.46591	7.38515	10.1886	8.40031	7.81485	Homo sapiens caspase 4, apoptosis-related cysteine peptidase pseudogene (LOC643733), transcript variant 1, non-coding RNA [NR_034078]	TTAAGCATTGAGAGTTGTTGGTGGTGTATGAAATAAATGAAAGTGTGATATTGGAGCAGG	chr11	104772383	104774173	-	FALSE	hs|11q22.3	ENST00000527637	643733	NR_034078	caspase 4, apoptosis-related cysteine peptidase pseudogene	NA	NR_034078	THC2505247
LOC101927799	0.00815036	0.249143	10.3786	10.3266	11.0329	10.882	11.1277	11.2092	13.2719	13.3305	13.0729	12.9643	10.0045	13.5617	12.9963	10.8647	PREDICTED: Homo sapiens uncharacterized LOC101927799 (LOC101927799), ncRNA [XR_244452]	ATCACATCCCGTGCCCCCTTCCTTTCTTAAAATAGCATAGTTGATGCCTTATTAAAATCT	chr22	50008184	50008243	-	FALSE	hs|22q13.33	NA	101927799	XR_244452	uncharacterized LOC101927799	NA	XR_244452	THC2624157
NDST3	0.00697859	2.93888	6.33196	5.11827	5.83248	5.24596	5.41942	6.18141	1.25056	6.20123	4.49111	3.22989	1.89975	0.705217	3.89473	4.29672	Homo sapiens N-deacetylase/N-sulfotransferase (heparan glucosaminyl) 3 (NDST3), mRNA [NM_004784]	TTGGAAAGAGCAAAGGAAGAAAATACCCTCCAATGGATTCTGATAGCAGGACATTTCTGT	chr4	119174713	119176763	+	FALSE	hs|4q26	ENST00000296499	9348	NM_004784	N-deacetylase/N-sulfotransferase (heparan glucosaminyl) 3	GO:0000139|GO:0019213|GO:0016021|GO:0015012|GO:0030210|GO:0015016	NM_004784	THC2474863
AKTIP	0.000154387	0.457654	7.09309	7.42351	6.85355	7.64589	6.90845	7.5807	8.29327	8.43838	8.71735	8.65407	8.89628	7.65365	7.90927	8.33747	Homo sapiens AKT interacting protein (AKTIP), transcript variant 1, mRNA [NM_001012398]	TTCATACAGCATGGACTTTACCAAGATGGCGTATTTAAGTTTACAGTTTACATCCCTGAT	chr16	53529009	53529068	-	FALSE	hs|16q12.2	ENST00000514047	64400	NM_001012398	AKT interacting protein	GO:0005515|GO:0030897|GO:0005794|GO:0016567|GO:0005886|GO:0008333|GO:0005730|GO:0006915|GO:0045022|GO:0015031|GO:0032092|GO:0005737|GO:0019787|GO:0001934|GO:0007032|GO:0007040|GO:0031625|GO:0070695	NM_001012398	THC2630226
C1orf115	0.000118611	4.72483	8.333	8.22491	8.1686	8.02795	7.51327	6.44959	4.82543	6.10143	4.66358	5.41219	5.33754	6.33431	6.02544	5.78914	Homo sapiens chromosome 1 open reading frame 115 (C1orf115), mRNA [NM_024709]	AGTAGGCCACTGTTCTGACTTTGTTTCCAGAATATCCAGAAATCCAAAGGGGCTGTTGCT	chr1	220871463	220871522	+	FALSE	hs|1q41	ENST00000294889	79762	NM_024709	chromosome 1 open reading frame 115	GO:0016021	NM_024709	THC2467012
EMB	0.00139992	2.18966	10.3866	10.7204	9.74919	10.2439	10.4526	10.2416	7.96341	8.64804	9.75511	9.54605	9.83509	8.18423	9.49974	8.97965	Homo sapiens embigin (EMB), mRNA [NM_198449]	GCTTGACTAACCCCAGATTATCTTTCAAGACTTTAATCTGATCTTGTGTCTTAGAGAAGC	chr5	49692335	49692394	-	FALSE	hs|5q11.1	ENST00000622787	133418	NM_198449	embigin	GO:0030054|GO:0035879|GO:0005887|GO:0045202|GO:0007155	NM_198449	THC2608130
MUC6	0.00861337	0.390759	9.59381	9.33423	9.48563	9.42031	9.43502	9.36914	11.0479	10.8902	10.7554	10.8459	9.08184	11.8491	10.7635	9.42551	Homo sapiens mucin 6, oligomeric mucus/gel-forming (MUC6), mRNA [NM_005961]	TCCCACCTTGTCGCCTACCACACGGTTCCTGACCAGCTCCCTCACTGCCCATGGAAGCAC	chr11	1015815	1015874	-	FALSE	hs|11p15.5	ENST00000619759	4588	NM_005961	mucin 6, oligomeric mucus/gel-forming	GO:0030277|GO:0006493|GO:0005796|GO:0016266|GO:0005576|GO:0044267|GO:0043687|GO:0005201	NM_005961	NP081518
SP140L	0.0221655	0.316395	4.73042	4.49228	5.78914	4.65297	5.53165	5.36073	7.99196	6.47644	3.73062	6.29046	6.2358	7.2806	7.43264	6.23061	Homo sapiens SP140 nuclear body protein-like (SP140L), mRNA [NM_138402]	AGGATTTCAAGGAAGTGTTTGCTATTCAGGAAACAAATGGGAACAGTTGACTGGTTTAGT	chr2	231267562	231267621	+	FALSE	hs|2q37.1	ENST00000483728	93349	NM_138402	SP140 nuclear body protein-like	GO:0006355|GO:0003682|GO:0008270|GO:0006338|GO:0005634|GO:0003677	NM_138402	THC2781857
LGALS7	0.0172348	0.333878	7.87861	8.06549	8.08321	7.72791	9.09404	7.67614	10.8188	10.3207	9.53385	9.41062	7.32987	10.1598	9.75898	8.02318	Homo sapiens lectin, galactoside-binding, soluble, 7 (LGALS7), mRNA [NM_002307]	GGTGGAGGTGGGCGGGGACGTGCAGCTGGACTCCGTGAGGATCTTCTGAGCAGAAGCCCA	chr19	39261655	39261714	-	FALSE	hs|19q13.2	ENST00000600304	3963	NM_002307	lectin, galactoside-binding, soluble, 7	NA	NM_002307	THC2472093
EPN3	0.00207866	0.325216	6.79544	6.68894	6.9102	6.89873	6.91919	6.95241	8.91424	8.95401	8.67272	8.5553	6.67023	8.86297	8.59335	7.21252	Homo sapiens epsin 3 (EPN3), mRNA [NM_017957]	TCCCTCAGCTTCCTCCTTGGTCAACCTTGACTCGTTGGTCAAGGCACCCCAGGTTGCAAA	chr17	48618973	48619032	+	FALSE	hs|17q21.33	ENST00000512291	55040	NM_017957	epsin 3	GO:0005515|GO:0048471|GO:0005905|GO:0030136|GO:0005634|GO:0019897|GO:0070062|GO:0008289	NM_017957	THC2486375
SAMD4A	0.00936571	0.426097	7.60587	7.4604	6.39821	6.4084	6.44824	5.8112	7.92869	8.32017	7.12862	9.1251	8.21804	6.69364	7.75217	8.02732	Homo sapiens sterile alpha motif domain containing 4A (SAMD4A), transcript variant 1, mRNA [NM_015589]	CCTCATGTATTTATGCCTAATGTAAGCTGACTTTTAAAAAGCTTTCTTTTGTTGCATGCC	chr14	55259595	55259654	+	FALSE	hs|14q22.2	ENST00000251091	23034	NM_015589	sterile alpha motif domain containing 4A	GO:0017148|GO:0005737|GO:0030054|GO:0045202|GO:0045727|GO:0030371|GO:0030425	NM_015589	THC2617989
MEGF6	3.11e-05	9.2091	5.99427	8.68397	7.32676	7.30036	7.17981	7.14243	3.66349	3.79216	3.32747	3.97663	4.14982	3.70685	5.14815	5.23699	Homo sapiens multiple EGF-like-domains 6 (MEGF6), mRNA [NM_001409]	TGCTCTGAGATATTCAGTCACCACAGTTCCCAAATGGCCTAGGAATTCAGAGAGTCAGAA	chr1	3404997	3405056	-	FALSE	hs|1p36.32	NA	1953	NM_001409	multiple EGF-like-domains 6	GO:0005515|GO:0008150|GO:0005509|GO:0005576|GO:0005575	NM_001409	THC2609435
SPAG1	0.00211951	0.495967	5.33375	5.42049	6.00743	6.1046	5.77852	6.1012	6.68827	6.20612	7.44942	6.52928	7.10747	5.97221	6.48647	7.48519	Homo sapiens sperm associated antigen 1 (SPAG1), transcript variant 1, mRNA [NM_003114]	TTTATACCTGAGTAAAGCAGAAAGGTTTAAGATGATGTTGACACTAATTAGCAAGGGCCA	chr8	101252969	101253147	+	FALSE	hs|8q22.2	ENST00000388798	6674	NM_003114	sperm associated antigen 1	GO:0007338|GO:0005737|GO:0016787|GO:0015630|GO:0008152|GO:0005654|GO:0070286|GO:0005525	NM_003114	THC2473361
BX106838 NCI_CGAP_Lu5 Homo sapiens cDNA clone IMAGp998D183974, mRNA sequence [BX106838]	0.00815527	0.296953	5.83197	5.58125	6.16482	5.72263	5.81774	5.50892	7.34541	7.06061	7.05102	7.17916	6.41385	9.36779	6.87223	5.67133	AGCTGGCTGTTAGGTGACTCTTTCCTTTTCTTTTTAAAACAAATATACTTTGGACAAAGC	chr9	129379913	129379972	-	FALSE	hs|9q33.3	NA	NA	BX106838	NA	NA	NA	THC2654929	NA
PPP1R14D	0.000192451	0.463537	3.86908	4.38442	4.4917	4.26676	3.57024	4.38061	5.37634	5.67482	5.30458	5.14873	4.47385	5.65286	4.95433	5.49559	Homo sapiens protein phosphatase 1, regulatory (inhibitor) subunit 14D (PPP1R14D), transcript variant 1, mRNA [NM_017726]	CAGATGGGGAGAACCCATGTAAGAAGGTCCACTGGGCTTCTGGGAGGAGAAGGACATCAT	chr15	41120740	41120799	-	FALSE	hs|15q15.1	ENST00000427255	54866	NM_017726	protein phosphatase 1, regulatory (inhibitor) subunit 14D	GO:0042325|GO:0005737|GO:0004864|GO:0043086	NM_017726	THC2489123
ATXN1L	0.00153941	0.191366	7.07555	6.96285	7.22202	7.03976	7.05035	7.00171	10.0269	9.98537	9.68422	9.46193	7.00759	9.85815	9.56111	7.53323	Homo sapiens ataxin 1-like (ATXN1L), mRNA [NM_001137675]	CTCCTCTCACTTGCCTTCCCATTTCATGAAAGGCGCCATCATCCAGCTGGCTACGGGAGA	chr16	71885026	71885085	+	FALSE	hs|16q22.2	ENST00000427980	342371	NM_001137675	ataxin 1-like	GO:0005515|GO:0048286|GO:0030198|GO:0003723|GO:0005730|GO:0005634|GO:0000122|GO:0003677|GO:0030425|GO:0006351	NM_001137675	NA
KCNS3	0.00394315	0.219291	6.70513	6.63381	6.00284	6.12137	6.9526	5.81821	8.87591	8.24344	6.17234	9.64988	8.75205	9.42904	8.16387	6.52298	Homo sapiens potassium voltage-gated channel, modifier subfamily S, member 3 (KCNS3), transcript variant 1, mRNA [NM_002252]	TGACTGAGACGACATGCATGTAAGATCCACAAAATGAGACAATGCATGTAAATCCATGCT	chr2	18114112	18114171	+	FALSE	hs|2p24.2	ENST00000403915	3790	NM_002252	potassium voltage-gated channel, modifier subfamily S, member 3	GO:0005251|GO:0005794|GO:0005886|GO:0007268|GO:0015459|GO:0044281|GO:0005737|GO:0006112|GO:0050796|GO:0008076|GO:0051260|GO:0034765|GO:0016021|GO:0006813|GO:0071805	NM_002252	THC2464656
AGGGAGGTCACTATGCAGGGTAGCACTGGGAACAGGAGACCCACCTGAGGCTCAGCCCTA	0.000207985	4.59003	12.1483	10.8016	11.916	10.2991	11.7068	10.905	9.10905	7.22937	9.17072	9.19473	10.0011	9.27052	9.56537	9.2021	chr5	122736498	122736557	-	FALSE	hs|5q23.2	NA	NA	NA	NA	NA	NA	NA	NA	NA
LOC100130152	0.0092102	0.412245	12.1657	11.9832	12.4492	12.0566	12.3985	12.2223	14.0012	13.6292	13.3901	13.7704	11.5428	13.9841	13.8104	12.3996	Homo sapiens cDNA FLJ45869 fis, clone OCBBF3004908. [AK127768]	CCAGGCCCAGCCTGCACCTCCACACCGGCCCTGCTCCTTCCTCCTCTAGGTCCAGGCCCC	chr20	62024839	62024898	-	FALSE	hs|20q13.33	NA	100130152	AK127768	uncharacterized LOC100130152	NA	NA	THC2601432
PDE9A	4.47e-05	0.3349	5.649	5.49754	5.40252	5.84304	5.5863	5.94777	7.48563	7.9368	7.24397	7.47087	6.32656	7.11252	7.29971	6.3952	Homo sapiens cDNA FLJ90181 fis, clone MAMMA1000706. [AK074662]	GACTTGGCCTTCTCTGTACTCTGTTCCAGTTACAGAAGAAGACTGACAGCTTGACGTCTG	chr21	44192520	44192579	+	FALSE	hs|21q22.3	NA	5152	AK074662	phosphodiesterase 9A	GO:0005515|GO:0048471|GO:0005794|GO:0004114|GO:0005783|GO:0047555|GO:0032587|GO:0019934|GO:0046872|GO:0005829|GO:0007165|GO:0007596|GO:0008152|GO:0043204	NA	NA
B3GNT9	1e-07	0.469327	7.90004	8.19826	7.98413	8.1097	7.94166	8.18462	9.36978	9.24797	9.23679	9.34135	8.91553	8.7342	9.1255	9.11178	Homo sapiens UDP-GlcNAc:betaGal beta-1,3-N-acetylglucosaminyltransferase 9 (B3GNT9), mRNA [NM_033309]	GCGTATGCGGACATCCTGCTCTGGGCCTTCGACGACACCTTTTTTAACCTAACGCTCAAG	chr16	67183768	67183827	-	FALSE	hs|16q22.1	ENST00000449549	84752	NM_033309	UDP-GlcNAc:betaGal beta-1,3-N-acetylglucosaminyltransferase 9	GO:0000139|GO:0006486|GO:0016021|GO:0008378	NM_033309	THC2471672
BLZF1	0.000128021	0.438132	5.8586	6.17702	6.85971	6.5254	6.51658	6.79438	7.86206	7.52251	8.03116	7.79947	7.6002	7.79678	7.2771	7.44762	Homo sapiens basic leucine zipper nuclear factor 1 (BLZF1), mRNA [NM_003666]	TCAGAGGTAAAGAATGTATTGGAAAAGCTCAAGAATTCTGAAAGAAGGTTACTACAGGAC	chr1	169346119	169346178	+	FALSE	hs|1q24.2	ENST00000426663	8548	NM_003666	basic leucine zipper nuclear factor 1	GO:0003700|GO:0006357|GO:0043001|GO:0005796|GO:0008283|GO:0005634|GO:0001558|GO:0003677|GO:0005737|GO:0000139|GO:0007030|GO:0005654|GO:0000278|GO:0019899|GO:0031625	NM_003666	THC2483308
Q3GT62_9ACTO (Q3GT62) Phosphoglycerate/bisphosphoglycerate mutase:RNase H, partial (3%) [THC2691276]	0.0223864	0.493269	7.5984	7.29378	7.7576	7.77912	7.67324	7.60264	9.31437	8.75658	8.06346	7.99215	7.29424	9.72195	8.56039	7.86754	CCGGGATTCGGAGAGGGCGCGGGAGGCAGGCACACGGGCCCGACCCCACTCCAGCGCTCA	chr18	42259520	42259579	+	FALSE	hs|18q12.3	NA	NA	NA	NA	NA	NA	THC2691276	NA
GABRD	0.00249113	0.18653	4.47221	6.05242	5.33754	5.50176	5.76708	5.17584	5.67587	8.83042	6.34498	8.96807	8.55808	6.64562	7.91215	6.44796	Homo sapiens gamma-aminobutyric acid (GABA) A receptor, delta (GABRD), mRNA [NM_000815]	CTCATTTCAACGCCGACTACAGGAAGAAGCAGAAGGCCAAGGTCAAGGTCTCCAGGCCGA	chr1	1961134	1961193	+	FALSE	hs|1p36.33	ENST00000378585	2563	NM_000815	gamma-aminobutyric acid (GABA) A receptor, delta	GO:0007165|GO:0005230|GO:0030054|GO:0005887|GO:0004890|GO:0045211|GO:0034707|GO:0006810|GO:0007268|GO:0005254	NM_000815	THC2464996
SLIT1	0.00123996	0.427142	10.1582	11.2463	11.5355	11.3636	10.9797	11.3588	12.7172	11.996	12.2404	12.2553	13.1773	11.3853	11.9933	12.6843	Homo sapiens slit homolog 1 (Drosophila) (SLIT1), mRNA [NM_003061]	CGAGGCCTGAGCTGCGGGCTGCCCTCTCCGGAAGTGCCTTGCACAAATAGGCGCTTAATA	chr10	98760612	98760671	-	FALSE	hs|10q24.1	ENST00000266058	6585	NM_003061	slit homolog 1 (Drosophila)	GO:0031290|GO:0051964|GO:0021510|GO:0005509|GO:0050919|GO:0048843|GO:0043395|GO:0048846|GO:0005615|GO:0048495|GO:0048853|GO:0033563|GO:0021834|GO:0008045|GO:0040023|GO:0007411	NM_003061	THC2471879
C10orf91	0.000308211	0.477691	5.39866	5.36747	5.0777	5.23371	4.72422	5.42425	6.04466	5.581	6.2623	6.31503	5.61064	6.79805	6.32759	6.84771	Homo sapiens chromosome 10 open reading frame 91 (C10orf91), mRNA [NM_173541]	AGACAAGAAGCACGTCGCCCATTTCTCATCAAGGCCAACCCCAGACCACGAGAGCGCTTT	chr10	134261306	134261365	+	FALSE	hs|10q26.3	ENST00000490765	170393	NM_173541	chromosome 10 open reading frame 91	NA	NM_173541	THC2484826
PP14571	0.00385687	0.193414	9.29534	9.25929	9.60969	9.19531	9.43321	9.35019	12.2187	12.26	12.1122	11.9397	8.88249	11.8383	12.084	9.54163	Homo sapiens uncharacterized LOC100130449 (PP14571), long non-coding RNA [NR_024014]	CCCACCCAGCTGTGACCTGCCACTTCCCTCCATCTCACATGCTTTCCCCTCACCTCCCTC	chr2	241390342	241390401	-	FALSE	hs|2q37.3	NA	100130449	NR_024014	uncharacterized LOC100130449	NA	NR_024014	THC2482563
PCDH15	0.000158731	9.06247	6.14358	6.5623	4.55734	5.32031	4.45979	3.44838	1.50995	0.770822	1.56332	0.789602	0.796691	4.58945	0.695917	0.865381	Homo sapiens protocadherin-related 15 (PCDH15), transcript variant K, mRNA [NM_001142771]	CATCCTAGTATCCACAGTAATATCAACGGCAATATATATATTGCACAGAATGGTTCTGTG	chr10	55566729	55566788	-	FALSE	hs|10q21.1	ENST00000373965	65217	NM_001142771	protocadherin-related 15	GO:0005886|GO:0007605|GO:0005509|GO:0032420|GO:0045202|GO:0045494|GO:0005615|GO:0050957|GO:0016021|GO:0007156|GO:0050953|GO:0001750|GO:0070062	NM_001142771	NA
RNF166	0.000149703	0.423638	5.84204	5.60092	5.56933	5.63753	5.48713	5.91464	7.00216	6.85073	7.03752	7.0328	5.91114	7.53962	7.0791	6.37612	Homo sapiens ring finger protein 166 (RNF166), transcript variant 1, mRNA [NM_178841]	CAATATCTGTGTTTGACTAGGAATAATAGTATTTTTATGGAACATTTACAAAATTATATT	chr16	88763372	88763431	-	FALSE	hs|16q24.3	ENST00000541206	115992	NM_178841	ring finger protein 166	GO:0008270	NM_178841	NP1206024
GHSR	1.72e-05	0.274059	9.02345	8.81452	9.23572	8.77447	8.767	8.86049	11.0799	11.0927	10.9812	11.1313	9.58113	10.8496	10.8658	10.0714	Homo sapiens growth hormone secretagogue receptor (GHSR), transcript variant 1b, mRNA [NM_004122]	TGTGGGTGTCCAGCATCTTCTTCTTCCTTCCTGTCTTCTGTCTCACGGTCCTCTACAGTC	chr3	172165504	172165563	-	FALSE	hs|3q26.31	ENST00000427970	2693	NM_004122	growth hormone secretagogue receptor	GO:0008343|GO:0043005|GO:0005886|GO:0032691|GO:0032100|GO:0016520|GO:0045409|GO:0032094|GO:0046697|GO:0045923|GO:0001616|GO:0030252|GO:0009725|GO:0040018|GO:0046676|GO:0051963|GO:0032869|GO:0009986|GO:0004930|GO:0042536|GO:0009755|GO:0007186|GO:0008154|GO:0043568|GO:0050728|GO:0045121|GO:0016021|GO:0017046|GO:0043134	NM_004122	THC2603925
SORBS1	0.013248	2.65244	9.27499	9.15507	8.99114	7.38347	7.6863	7.54348	7.00436	7.09791	6.17154	6.69804	7.24693	5.86113	7.72839	8.08573	Homo sapiens cDNA FLJ12406 fis, clone MAMMA1002842. [AK022468]	TCCCCTTCTTGTCCAGAGGCTCTCTGGTATCTGACTGCAGGCATTCAGCTTCCCCTGAGT	chr10	97150767	97150826	-	FALSE	hs|10q24.1	NA	10580	AK022468	sorbin and SH3 domain containing 1	GO:0005515|GO:0008092|GO:0008286|GO:0005886|GO:0005158|GO:0043149|GO:0005634|GO:0016363|GO:0005829|GO:0046889|GO:0005915|GO:0005737|GO:0005913|GO:0006936|GO:0015758|GO:0048041|GO:0046326|GO:0005899|GO:0005813|GO:0001725|GO:0032869|GO:0045725|GO:0019901|GO:0003779|GO:0009967|GO:0007160|GO:0005070|GO:0045121|GO:0005654|GO:0005924|GO:0005925|GO:0090004	NA	THC2479155
KLHL35	0.00234124	0.258223	5.23751	5.79007	5.25372	5.3093	4.60561	5.90947	6.10707	6.32531	7.37364	6.79691	8.44741	6.10049	6.28315	8.63156	Homo sapiens kelch-like family member 35 (KLHL35), mRNA [NM_001039548]	CCGGAGGCCACATCAACAGTCATGATGTGTGGATGTTTAGCTCCCATCTGCACACCTGGA	chr11	75137627	75139489	-	FALSE	hs|11q13.4	ENST00000539798	283212	NM_001039548	kelch-like family member 35	NA	NM_001039548	THC2602242
TMEM74	0.0303701	0.262333	4.71085	4.30388	4.5177	6.88509	6.29323	6.89915	5.67133	6.76092	7.29077	8.60457	9.3602	6.88087	5.49858	8.74958	Homo sapiens transmembrane protein 74 (TMEM74), mRNA [NM_153015]	GGTGGTCCTACACACAGTAGGATCAATTGCTAATCTACTTTGTGAAAAAGAACTAAGCAC	chr8	109796006	109796065	-	FALSE	hs|8q23.1	ENST00000297459	157753	NM_153015	transmembrane protein 74	GO:0000421|GO:0006914|GO:0031410|GO:0016021|GO:0005765	NM_153015	THC2477528
RRP7B	0.00301069	0.238056	10.4843	10.4699	10.8885	10.5772	10.9067	10.5368	13.2	13.126	13.0071	12.9332	10.1462	13.0358	12.9885	11.0714	Homo sapiens ribosomal RNA processing 7 homolog B (S. cerevisiae) (RRP7B), non-coding RNA [NR_002184]	CCTGCCCTTCCTTCCTCCAGCTGGCTGGATATTTATTATTAGCCAGGAGAAAGCAGCCCT	chr22	42970264	42970323	-	FALSE	hs|22q13.2	ENST00000458605	91695	NR_002184	ribosomal RNA processing 7 homolog B (S. cerevisiae)	NA	NR_002184	THC2463180
HIST1H1C	2.24e-06	9.61395	10.9325	11.0922	11.8	11.1877	12.2768	11.8771	7.81006	7.71532	7.61328	6.8172	8.39081	10.0733	8.08087	7.44942	Homo sapiens histone cluster 1, H1c (HIST1H1C), mRNA [NM_005319]	AGAAAGCTGCCAAAAGTGCTGCTAAGGCTGTGAAGCCCAAGGCCGCTAAGCCCAAGGTTG	chr6	26056050	26056109	-	FALSE	hs|6p22.2	ENST00000343677	3006	NM_005319	histone cluster 1, H1c	GO:0005515|GO:0005719|GO:0006334|GO:0016584|GO:0005634|GO:0000786|GO:0031490	NM_005319	THC2467269
FAM189A2	0.000500849	2.31991	7.43074	7.98389	8.71066	7.67412	8.26995	7.73555	6.33645	7.27242	6.89351	7.125	6.8266	6.05339	6.53446	7.08988	Homo sapiens family with sequence similarity 189, member A2 (FAM189A2), transcript variant 1, mRNA [NM_004816]	TGTGATCCCATTGGATCTGGGCTGCATACAAGTGACTCAAGATGGGGACATTCCTAACAT	chr9	71998901	72000729	+	FALSE	hs|9q21.11	ENST00000460871	9413	NM_004816	family with sequence similarity 189, member A2	GO:0008150|GO:0003674|GO:0016021|GO:0005575	NM_004816	THC2769165
TAGACATCAAGAAAATGGATACTGTTCAAAAATGCCCCACAAATGTTAACCATGGCAAAA	0.000864644	0.138846	10.4889	10.5018	9.71669	11.226	9.8889	10.3956	13.5824	14.1279	13.5522	13.4957	10.0552	13.4749	13.5079	11.558	chr2	172443719	172443782	+	FALSE	hs|2q31.1	NA	NA	NA	NA	NA	NA	NA	NA	NA
ZBED2	0.00352373	2.84599	5.84598	5.42637	6.29539	4.57876	5.87562	4.60957	4.09962	3.95994	4.36762	4.16649	3.67909	3.93472	3.6726	4.451	Homo sapiens zinc finger, BED-type containing 2 (ZBED2), mRNA [NM_024508]	AGACCACCAGTATGAATAAAAGCTTGTTCTGTGTGACCCAGCAAGTGGAAGGACAAAGAA	chr3	111311845	111311904	-	FALSE	hs|3q13.2	ENST00000317012	79413	NM_024508	zinc finger, BED-type containing 2	GO:0003677|GO:0046872	NM_024508	THC2476201
NCAM1	0.00064392	0.265593	4.51733	4.71208	5.10523	4.81302	4.85879	4.64287	6.22203	6.78002	6.12607	7.27777	7.52645	4.83171	6.09126	7.1392	Homo sapiens neural cell adhesion molecule 1 (NCAM1), transcript variant 3, mRNA [NM_001076682]	CCCCAGACTCTGAGAATGATTTTGGGAACTACAACTGTACTGCAGTGAACCGCATTGGGC	chr11	113103444	113103503	+	FALSE	hs|11q23.2	ENST00000611284	4684	NM_001076682	neural cell adhesion molecule 1	GO:0005886|GO:0009986|GO:0019221|GO:0031225|GO:0042802|GO:0000139|GO:0016020|GO:0007411|GO:0030198|GO:0016021|GO:0007155|GO:0009897|GO:0070062|GO:0060333	NM_001076682	THC2481779
ribosomal protein S2 pseudogene 45 [Source:HGNC Symbol;Acc:HGNC:25709] [ENST00000469997]	0.00991286	0.489851	7.38452	7.51001	7.49178	7.05486	6.6074	7.18319	8.98532	8.37391	8.17138	8.4908	7.11805	8.09106	8.77894	6.98105	TATGCTTGGTGTGTGCCAGCTGTTTTGGGAGTGATGTTTTTCCTTATTTCTCTTGGCTCC	chr16	69069445	69069504	+	FALSE	hs|16q22.1	ENST00000469997	NA	AK022393	NA	NA	NA	NA	NA
KLHL34	0.00377588	4.5681	5.73767	5.96495	5.25054	7.87349	5.41753	5.1126	3.54192	4.07129	3.69667	3.65697	3.86555	5.28079	3.50947	4.09263	Homo sapiens kelch-like family member 34 (KLHL34), mRNA [NM_153270]	GGGCGGGGGGTCAAATAGAAGGCTATATGAATCAACTTCAGTGAGCTGGTGAAAGAAAAT	chrX	21673726	21673785	-	FALSE	hs|Xp22.12	ENST00000379499	257240	NM_153270	kelch-like family member 34	GO:0005615	NM_153270	THC2478954
CDA	0.00119116	0.407228	6.90414	7.32176	7.40639	6.52827	7.09627	6.86151	8.39619	8.26104	7.86691	7.93434	7.20034	9.35002	8.84211	7.79481	Homo sapiens cytidine deaminase (CDA), mRNA [NM_001785]	AGAATGCCCACTGCCTGTAACAGCCACCTGGAGAACTTCATAAAGATGTCTCACAGCCCT	chr1	20945069	20945128	+	FALSE	hs|1p36.12	ENST00000461985	978	NM_001785	cytidine deaminase	GO:0030308|GO:0009972|GO:0045980|GO:0019858|GO:0055086|GO:0005576|GO:0044281|GO:0043097|GO:0008655|GO:0042803|GO:0005829|GO:0051289|GO:0001882|GO:0004126|GO:0008270|GO:0006206|GO:0007166	NM_001785	NP1079190
NKAIN2	0.00132499	5.56018	8.30302	6.68123	6.913	6.09247	6.56002	4.7788	4.0937	4.05988	3.60056	3.03552	3.52411	6.47314	3.78429	2.72529	Homo sapiens Na+/K+ transporting ATPase interacting 2 (NKAIN2), transcript variant 1, mRNA [NM_001040214]	ACAGCTGTATCCTCCTCAAAATCCGGTGAAGAATGCTATTTTTCTAGGCTGAGCTTTTGT	chr6	125146578	125146637	+	FALSE	hs|6q22.31	ENST00000545433	154215	NM_001040214	Na+/K+ transporting ATPase interacting 2	GO:0005886|GO:0016021	NM_001040214	THC2472544
ENAH	6.34e-05	2.29543	8.92822	8.15449	8.62548	8.35815	8.74976	8.76632	7.1681	7.7728	7.34621	7.49894	7.43287	6.32831	7.53575	7.82421	Homo sapiens enabled homolog (Drosophila) (ENAH), transcript variant 1, mRNA [NM_001008493]	TCAAGTCACATAAGAGTAAAATCTTTTGGTGAGGAGACACATTTGACAACTGCTAAAGAA	chr1	225680623	225680682	-	FALSE	hs|1q42.12	ENST00000366844	55740	NM_001008493	enabled homolog (Drosophila)	GO:0005515|GO:0050852|GO:0001725|GO:0017124|GO:0030054|GO:0005886|GO:0050699|GO:0045202|GO:0001843|GO:0046907|GO:0003779|GO:0030175|GO:0030027|GO:0005829|GO:0005737|GO:0007411|GO:0008154|GO:0005925	NM_001008493	THC2666598
AIFM3	0.00184192	2.15198	7.58703	7.44372	7.47161	7.59417	7.22023	7.40942	6.44844	5.79209	5.14065	6.46484	6.20123	5.38318	6.21804	7.63154	Homo sapiens apoptosis-inducing factor, mitochondrion-associated, 3 (AIFM3), transcript variant 2, mRNA [NM_001018060]	CTGGAGGAGCTGAAGTTTGTGGCTTTTTACACTAAAGGCGACGAGGTGATCGCCGTGGCC	chr22	21333957	21334333	+	FALSE	hs|22q11.21	ENST00000465606	150209	NM_001018060	apoptosis-inducing factor, mitochondrion-associated, 3	GO:0005739|GO:0051537|GO:0005783|GO:0050660|GO:0016491|GO:0005743|GO:0097194|GO:0045454|GO:0005634|GO:0046872|GO:0055114	NM_001018060	THC2696730
LSM11	0.0430601	0.415378	7.57412	7.40507	8.33237	7.35869	7.96196	7.50205	7.65212	8.69046	7.91569	8.48594	8.21117	7.80237	9.39153	10.7262	Homo sapiens LSM11, U7 small nuclear RNA associated (LSM11), mRNA [NM_173491]	TTTTAGTCCTTTGGAACAAATGTGTGATGTTATGTCTGATGTTGTGTTTTTAGAGCTGTG	chr5	157187185	157187244	+	FALSE	hs|5q33.3	ENST00000286307	134353	NM_173491	LSM11, U7 small nuclear RNA associated	GO:0005515|GO:0006369|GO:0010467|GO:0006398|GO:0006366|GO:0008334|GO:1900087|GO:0031124|GO:0005634|GO:0005683|GO:0005654|GO:0071204|GO:0071209	NM_173491	THC2491620
Homo sapiens cDNA FLJ14253 fis, clone OVARC1001376. [AK024315]	0.018891	0.346474	9.57282	9.20728	9.33366	8.98919	8.83475	9.64615	11.5925	11.0086	10.7827	11.2976	8.61925	10.6003	11.3804	8.80126	CTGAGCCTGGGAGGTAATACAAAAATGAATGAGTGGACCTTGTGGGTTCCATGCTAGTTA	chrX	48951012	48951071	-	FALSE	hs|Xp11.23	NA	NA	AK024315	NA	NA	NA	THC2512573	NA
TRPC2	0.0189886	0.436095	5.61783	5.39866	5.98242	5.43942	5.68138	5.68839	6.72092	5.85148	6.31353	6.38308	5.78351	8.50451	6.65362	6.21921	Homo sapiens transient receptor potential cation channel, subfamily C, member 2, pseudogene (TRPC2), non-coding RNA [NR_002720]	GTGGAGTGGACGTTTGCTCGCTCCAAGCTGTATCTGTTCTACTTCCGAGAGGGCCTGACA	chr11	3656287	3656346	+	FALSE	hs|11p15.4	ENST00000451043	7221	NA	transient receptor potential cation channel, subfamily C, member 2, pseudogene	NA	NR_002720	THC2670399
te98e09.x1 NCI_CGAP_Pr28 Homo sapiens cDNA clone IMAGE:2094760 3' similar to TR:Q29330 Q29330 TRANSLOCON ASSOCIATED PROTEIN GAMMA CHAIN ;, mRNA sequence [AI420375]	0.00286211	0.463689	6.9181	7.18138	6.68987	7.20915	5.73191	6.53116	8.10786	7.93246	7.83898	7.937	7.70564	7.86754	7.80072	7.9471	TCAATCTCCATATTTCAGTTAACTTCAAACCTTGTTTCAAATTATCCTTTCCAAGTTTCA	chr3	156257997	156258056	+	FALSE	hs|3q25.31	NA	NA	AI420375	NA	NA	NA	NA	NA
CACTIN	0.00547574	0.347119	11.0743	11.0134	11.1626	11.0795	11.4115	11.4865	13.2197	13.2008	12.868	12.3493	10.6379	13.3847	12.9209	11.6136	Homo sapiens cactin, spliceosome C complex subunit (CACTIN), transcript variant 2, mRNA [NM_021231]	CCCCGCCTCATCTGGAAATAGTTCCGTTTGTTTCTCTAAAAAGACTTGTAGGTGGGAAAA	chr19	3610720	3610779	-	FALSE	hs|19p13.3	ENST00000221899	58509	NM_021231	cactin, spliceosome C complex subunit	GO:0005515|GO:0032717|GO:0034122|GO:0032720|GO:0005634|GO:0007275|GO:0032088|GO:0071013|GO:0005737|GO:0071222|GO:0060339|GO:0000398|GO:0045087|GO:0071356|GO:0071347|GO:0001933|GO:0005654|GO:0031665|GO:0032688|GO:0070062	NM_021231	THC2496548
Q5CHL3_CRYHO (Q5CHL3) Hydroxyproline-rich glycoprotein dz-hrgp, partial (6%) [THC2689623]	0.00698743	0.141752	7.72143	7.52483	7.68158	8.22804	7.69986	7.60044	10.9533	10.7765	11.194	11.2296	7.24357	11.0823	10.3341	7.30605	TCTTCCACCAGCGCAAAGGGAAGCTATCGGTTGCTTCTGCAGTGAGGCAAGCTCAGCCGG	chr6	14211887	14211946	-	FALSE	hs|6p23	NA	NA	NA	NA	NA	NA	THC2689623	NA
TRIOBP	0.0019557	0.435555	5.7716	5.78189	6.13496	5.94534	5.96971	6.11583	7.60925	7.57994	7.4429	7.06927	5.67693	7.32235	7.21654	6.47176	Homo sapiens TRIO and F-actin binding protein (TRIOBP), transcript variant 6, mRNA [NM_001039141]	TCTCCCAACAGAACCACCCAACAAGACAGCCCCAGAACATCCTGTGCCCGACGGGACGAT	chr22	38120475	38120534	+	FALSE	hs|22q13.1	ENST00000492485	11078	NM_001039141	TRIO and F-actin binding protein	GO:0030047|GO:0005815|GO:0030496|GO:0005634|GO:0015629|GO:0045159|GO:0005737|GO:0007067|GO:0051016|GO:0051015|GO:1900026|GO:0017049|GO:0005925|GO:0031625|GO:0051301	NM_001039141	THC2687777
TTCTGAAGTGAGTTCCATTAAGCCAGTTTAACTCCCTGATCATTTTCCTATCCCGTCTAG	6.1e-06	2.87015	6.41105	5.96617	6.08362	6.03601	6.37679	5.93837	4.43485	3.84227	4.41083	4.28103	5.42095	4.91921	4.68384	4.4706	chr7	111996234	111996293	+	FALSE	hs|7q31.1	NA	NA	NA	NA	NA	NA	NA	NA	NA
FLRT2	0.000302923	5.25532	5.61852	6.73374	5.01632	5.77213	5.40906	4.7707	1.89975	2.37106	0.74396	2.78204	1.62993	1.03781	5.70901	2.11552	Homo sapiens fibronectin leucine rich transmembrane protein 2 (FLRT2), mRNA [NM_013231]	CCTGATGCTCTTTCTAAAGTCAAAATATGAATGCTAAGAAGGCATAACCTACATCCTTCT	chr14	86093644	86093703	+	FALSE	hs|14q31.3	ENST00000330753	23768	NM_013231	fibronectin leucine rich transmembrane protein 2	GO:2001222|GO:0005578|GO:0050919|GO:0005615|GO:0035556|GO:0008150|GO:0045499|GO:0005887|GO:0007411|GO:0005057|GO:0007155|GO:0030674|GO:0005925|GO:0070062	NM_013231	THC2606439
NR2F1-AS1	0.00131487	2.91522	7.98532	7.29303	6.86469	7.36806	7.59773	7.04656	4.95306	4.35409	4.65022	4.96004	5.02048	7.56457	6.74871	4.83705	Homo sapiens NR2F1 antisense RNA 1 (NR2F1-AS1), transcript variant 1, long non-coding RNA [NR_109825]	GCATTGCTTTTCAACTTAATTGAATACTTACTATATGTGAACCACTGCACAAAATAGGGG	chr5	92746855	92746914	-	FALSE	hs|5q15	NA	441094	NR_109825	NR2F1 antisense RNA 1	NA	NR_109825	THC2522186
PLXND1	2.55e-05	0.24377	10.8579	10.5239	10.3722	10.4122	11.0717	10.311	12.6357	12.9779	11.6088	13.492	12.5317	11.4824	12.6817	12.8136	Homo sapiens plexin D1 (PLXND1), mRNA [NM_015103]	CGAGGCTGTAGCTGGGCTACTTGATCTTGCTGAAAGTGTTTCTAAAGATAGCACCACTTT	chr3	129274398	129274457	-	FALSE	hs|3q22.1	ENST00000512744	23129	NM_015103	plexin D1	GO:0005515|GO:0030334|GO:0001569|GO:0005886|GO:0019904|GO:0045765|GO:0001525|GO:0007416|GO:0003151|GO:0030027|GO:0032092|GO:0005622|GO:0017154|GO:0043542|GO:0005887|GO:0007411|GO:0060666|GO:0071526	NM_015103	THC2685013
EDIL3	0.0415373	0.24255	5.47795	5.20401	7.67992	8.78834	8.00301	8.60475	6.2633	10.8401	9.29807	10.7259	10.4823	9.63187	7.24968	9.88632	Homo sapiens EGF-like repeats and discoidin I-like domains 3 (EDIL3), transcript variant 1, mRNA [NM_005711]	ACATGACTGCCTATCAGTAGATTGATCTGTATTTAATATTCGTTAATTAAATCTGCAGTT	chr5	83238463	83238522	-	FALSE	hs|5q14.3	ENST00000380138	10085	NM_005711	EGF-like repeats and discoidin I-like domains 3	GO:0005178|GO:0010811|GO:0005509|GO:0007275|GO:0007155|GO:0031982|GO:0070062	NM_005711	THC2464367
SLC6A1	0.000107009	0.22967	5.66119	5.40226	4.90542	5.61235	4.8571	5.3745	7.0352	7.01901	6.07131	6.68392	7.64236	7.76295	7.03001	8.74065	Homo sapiens solute carrier family 6 (neurotransmitter transporter), member 1 (SLC6A1), mRNA [NM_003042]	AATGCAGTGTATTTAATGTTTGTAAGCAATTCTAAGTGAGATGTTTGGCAAGAAATCCCC	chr3	11080462	11080521	+	FALSE	hs|3p25.3	ENST00000287766	6529	NM_003042	solute carrier family 6 (neurotransmitter transporter), member 1	GO:0030424|GO:0010288|GO:0005886|GO:0009986|GO:0005328|GO:0051939|GO:0007268|GO:0009636|GO:0014054|GO:0042220|GO:0055085|GO:0014074|GO:0007269|GO:0051592|GO:0016020|GO:0005887|GO:0009744|GO:0006810|GO:0032229|GO:0051260|GO:0016021|GO:0007612|GO:0032355|GO:0005332	NM_003042	THC2464096
TEPP	0.0157725	0.315317	6.32288	6.41607	6.44565	6.29992	6.07843	6.30085	8.25512	8.45432	7.78556	7.53983	5.49664	9.24491	7.76798	6.45311	Homo sapiens testis, prostate and placenta expressed (TEPP), transcript variant 2, mRNA [NM_199456]	TCAGCGGCTACGCGGTGCGGTACTTGAAGCCCGACGTGACCCAGACCTGGCGGTACTGCC	chr16	58019119	58019392	+	FALSE	hs|16q21	ENST00000441824	374739	NM_199456	testis, prostate and placenta expressed	GO:0005576	NM_199456	THC2486215
GALNT12	0.000453816	3.00224	6.10927	6.66016	7.45433	7.69711	6.71647	6.52085	4.73072	5.36108	5.38998	4.72686	5.46499	4.56865	5.13909	6.55317	Homo sapiens polypeptide N-acetylgalactosaminyltransferase 12 (GALNT12), mRNA [NM_024642]	GAGAATCAGAAGTTCATCTTGCAGGAGGATGGATCTTTATTTCACGAACAGTCCAAGAAA	chr9	101608379	101611266	+	FALSE	hs|9q22.33	ENST00000375011	79695	NM_024642	polypeptide N-acetylgalactosaminyltransferase 12	GO:0004653|GO:0006493|GO:0000139|GO:0030246|GO:0016266|GO:0016021|GO:0044267|GO:0046872|GO:0043687	NM_024642	THC2470561
KLF8	0.00120395	2.08794	7.25386	7.52183	7.59941	7.83783	7.47579	6.65611	5.58158	5.59626	5.79659	6.648	6.03672	6.98729	6.55091	6.95902	Homo sapiens Kruppel-like factor 8 (KLF8), transcript variant 1, mRNA [NM_007250]	TTTCTGAGTTTGAGGCACATTCCCAGTGAATAAGCTGAGTCCCATACCACACTCAAAAGG	chrX	56311439	56311498	+	FALSE	hs|Xp11.21	ENST00000358094	11279	NM_007250	Kruppel-like factor 8	GO:0006355|GO:0005634|GO:0003677|GO:0046872|GO:0006351	NM_007250	THC2473486
CST5	4.31e-05	0.413173	11.4507	12.1221	11.8902	12.1379	12.0512	11.578	13.2214	13.1911	12.3369	12.9181	13.7914	12.9235	12.946	13.5648	Homo sapiens cystatin D (CST5), mRNA [NM_001900]	AACTTGGACAACTGTCCCTTCAATGACCAGCCAAAACTGAAAGAGGAAGAGTTCTGCTCT	chr20	23856894	23858186	-	FALSE	hs|20p11.21	ENST00000304710	1473	NM_001900	cystatin D	GO:0010951|GO:0005515|GO:0004869|GO:0005576|GO:0070062	NM_001900	THC2477887
LOC284072	0.011791	0.178625	5.81094	6.56252	6.15848	5.93268	5.80693	5.43737	7.94668	7.69777	7.78077	7.5318	5.89466	10.7436	6.78834	6.79649	Homo sapiens cDNA FLJ38084 fis, clone CTONG2016499. [AK095403]	GGCGACCCAGCTGTTAAGCAGAACAAATCAATCCACGGATGGAGAAGAGGTCGTGGGTCT	chr17	70588351	70588410	+	FALSE	hs|17q24.3	NA	284072	AK095403	uncharacterized LOC284072	NA	NA	THC2550961
lnc-BBOX1-1	0.000302612	4.09016	4.2514	4.48321	4.64478	5.17344	4.12705	4.70122	1.38965	2.83332	2.83738	2.90585	1.11919	0.63738	3.23117	3.3345	AF150379 Human mRNA from cd34+ stem cells Homo sapiens cDNA clone CBMAJE07, mRNA sequence [AF150379]	TTCCCATGCATATTTTCATGCTTTTCGTATGCATGTATCCCTAAACAATAAACAGCATTG	chr11	27497697	27497756	+	FALSE	hs|11p14.1	NA	NA	AF150379	lnc-BBOX1-1:1	NA	NA	THC2627479
oligosaccharyltransferase complex subunit pseudogene 4 [Source:HGNC Symbol;Acc:HGNC:42866] [ENST00000424397]	0.000442189	0.446685	8.8339	9.80873	9.08962	9.69474	9.44178	9.85089	10.9263	10.8988	11.0892	10.9471	9.87311	10.2614	10.7661	10.0452	TATGTTGTTATTGTTGAACCTCCAAGTGGCTCTATGACTGATGAACATGGGTATCAGAGG	chr4	113606358	113606419	+	FALSE	hs|4q25	ENST00000424397	NA	NA	NA	NA	NA	NA	NA
AMZ1	0.000299605	10.6982	4.54987	7.06723	7.28286	8.11864	6.14334	6.95467	2.52548	2.20835	1.55516	3.41561	4.01377	4.62223	3.78614	4.27684	Homo sapiens archaelysin family metallopeptidase 1 (AMZ1), transcript variant 1, mRNA [NM_133463]	CATCTTCTGCAAAAGGTTAACCGCTGGAGTGATGCGAGATTAAACAGAGGTGATAAAAAT	chr7	2755010	2755069	+	FALSE	hs|7p22.3	ENST00000312371	155185	NM_133463	archaelysin family metallopeptidase 1	GO:0006508|GO:0008270|GO:0008237	NM_133463	NA
MPHOSPH9	1.05e-05	0.375949	6.50526	6.15986	6.39431	6.0096	5.89356	6.3384	7.99779	7.82013	7.65127	7.57545	6.59913	7.84179	7.82337	7.44431	M-phase phosphoprotein 9 [Source:HGNC Symbol;Acc:HGNC:7215] [ENST00000563178]	ATGTCAATCTCTGGACCTGCCTTCTGGACGCCATTTATCTAAAATTCACTGTTTGTTTTT	chr12	123725168	123725227	-	FALSE	hs|12q24.31	ENST00000563178	10198	NA	M-phase phosphoprotein 9	GO:0005813|GO:0005737|GO:0005794|GO:0016020|GO:0005886|GO:0000139|GO:0005814	NA	NA
SPAG9	0.000465295	0.457062	6.38849	6.24627	6.74984	6.90916	6.18966	6.56775	8.01144	7.65269	7.68577	7.85343	8.27314	6.70708	6.92382	7.55752	Homo sapiens sperm associated antigen 9 (SPAG9), transcript variant 1, mRNA [NM_001130528]	CTCCATTCCATTAAACTTAAAGATTCGATTCTCAGTATTGTACACGTGAAGGGAATCGTG	chr17	49062333	49063099	-	FALSE	hs|17q21.33	ENST00000357122	9043	NM_001130528	sperm associated antigen 9	GO:0005515|GO:0048471|GO:0030335|GO:0090074|GO:0001669|GO:0030159|GO:0007257|GO:0007283|GO:0005829|GO:0042692|GO:0005737|GO:0051149|GO:0045666|GO:0042147|GO:0051260|GO:0048273|GO:0016021|GO:0019894|GO:0008432|GO:0051146|GO:0005078|GO:0070062	NM_001130528	NP651057
ZC3H13	0.0108357	0.317351	7.00127	6.02823	7.51726	5.70961	5.55439	5.94227	8.83737	8.83859	8.46989	8.27259	5.85812	7.81905	8.29916	6.3214	Homo sapiens zinc finger CCCH-type containing 13 (ZC3H13), mRNA [NM_015070]	AGACTTAGTTCTTGCCCTACTGTATCTGCCTTGTTTGGTTGGTTCTGTGACCTTAAGCAA	chr13	46536632	46536691	-	FALSE	hs|13q14.13	ENST00000282007	23091	NM_015070	zinc finger CCCH-type containing 13	GO:0005515|GO:0046872	NM_015070	THC2461124
RBPMS2	0.00437526	0.302502	6.30515	6.63704	7.02228	5.39947	5.93837	5.6114	6.95513	7.80216	5.89277	7.51001	9.19365	8.29423	7.4224	8.53929	Homo sapiens RNA binding protein with multiple splicing 2 (RBPMS2), mRNA [NM_194272]	CCCTGTCAGATAAGTTTAATGTTTAGTTTGAGGCATGAAGAAGAAAAGGGTTTCCATTCT	chr15	65032316	65032375	-	FALSE	hs|15q22.31	ENST00000300069	348093	NM_194272	RNA binding protein with multiple splicing 2	GO:0000166|GO:0003676	NM_194272	THC2472982
AGCCAGTCCGCAGCAGCTTTTCAAAATGCACTATGCCTGATTGCTGATCGTGTTTTAACT	0.00779871	2.21097	10.8849	10.4522	9.27659	10.8832	11.0314	10.8142	10.0188	9.61843	9.8213	9.95818	9.83874	8.92609	8.77388	8.14719	chr3	5026479	5026539	+	FALSE	hs|3p26.1	NA	NA	NA	NA	NA	NA	NA	NA	NA
RBMS3	0.0026581	2.10625	9.9369	9.50735	9.94405	9.61013	10.1118	9.46027	8.7735	9.61535	7.30236	8.28022	7.86878	9.25224	9.12273	7.98956	Homo sapiens RNA binding motif, single stranded interacting protein 3 (RBMS3), transcript variant 1, mRNA [NM_001003793]	GCTTTACAAAGTTTTTAGTCAGCTTTGCTTGTCACATTGCAAAACCTAGCTTAAGAGCAT	chr3	30046319	30046378	+	FALSE	hs|3p24.1	ENST00000383766	27303	NM_001003793	RNA binding motif, single stranded interacting protein 3	GO:0005737|GO:0000166|GO:0045727|GO:0003730	NM_001003793	THC2474255
LAMA1	0.0111122	2.32357	8.76777	9.21339	8.74024	8.66267	8.99943	8.47139	10.0155	5.49311	7.67614	5.83697	5.15052	5.3155	7.16505	2.42749	Homo sapiens laminin, alpha 1 (LAMA1), mRNA [NM_005559]	GAGGAGAAGTGTATGTGTGAATTAAGAATCTCTTCAGTTCATATTTCATTTCCAACTCAG	chr18	6941976	6942035	-	FALSE	hs|18p11.31	ENST00000579014	284217	NM_005559	laminin, alpha 1	GO:0030334|GO:0005515|GO:0002011|GO:0005102|GO:0005578|GO:0005606|GO:0005576|GO:0005608|GO:0030155|GO:0005615|GO:0045198|GO:0005604|GO:0045995|GO:0031012|GO:0061304|GO:0060441|GO:0043208|GO:0030198|GO:0007411|GO:0005911|GO:0007155|GO:0007166|GO:0060445|GO:0005201	NM_005559	THC2609410
GRIP2	0.00124583	0.315888	4.66861	5.38401	5.11316	4.35103	5.17553	4.38846	6.25285	7.03703	5.35772	7.02206	7.04285	4.7741	6.71935	6.82813	glutamate receptor interacting protein 2 [Source:HGNC Symbol;Acc:HGNC:23841] [ENST00000422481]	ATTACAGTTTAGTGCTGGTATACCACAGGCTCTTCATAAACTCAAGCAAATTCATTTCAC	chr3	14562298	14562356	-	FALSE	hs|3p25.1	ENST00000422481	80852	AK074145	glutamate receptor interacting protein 2	GO:0005886|GO:0030159|GO:0007268|GO:0005829	NA	THC2624491
nucleophosmin 1 (nucleolar phosphoprotein B23, numatrin) pseudogene 36 [Source:HGNC Symbol;Acc:HGNC:45215] [ENST00000415681]	0.00437001	0.302988	8.39941	8.00049	8.34452	8.62492	8.20878	8.52984	10.2635	11.0988	10.4411	9.90895	7.61962	10.1091	9.97981	9.28563	ATGCACAAAAGTCAAATCAGAATGGAGACTCAAAACCATCAAAGCTAAGATCAAAAGGTC	chr6	55804588	55804621	-	FALSE	hs|6p12.1	ENST00000415681	NA	NA	NA	NA	NA	NA	NA
PPAPDC3	0.0408305	0.344985	9.47306	10.259	9.75995	9.08393	10.3812	8.50111	11.3863	10.8493	7.7138	12.0548	11.933	10.9634	11.5157	10.7014	Homo sapiens phosphatidic acid phosphatase type 2 domain containing 3 (PPAPDC3), mRNA [NM_032728]	AATAGGTCGTTTCCAAGTCACCCGTTTTGGATGTGCATTTCATGTGACAATACAGATGAC	chr9	134184578	134184637	+	FALSE	hs|9q34.13	ENST00000372264	84814	NM_032728	phosphatidic acid phosphatase type 2 domain containing 3	GO:0016787|GO:0008152|GO:0005789|GO:0016021|GO:0010832|GO:0005635	NM_032728	THC2470880
SLC7A4	0.000149279	2.15929	9.06925	9.78791	9.81739	10.1145	9.66634	9.77639	8.14416	7.80811	8.63175	9.16906	8.56205	8.63471	8.69929	8.94267	Homo sapiens solute carrier family 7, member 4 (SLC7A4), mRNA [NM_004173]	TGGACTCTGCCCAGAGCCTTCTTGTTTATGATCAGCTCCAGCTACCTGGGCAGTTGTGGT	chr22	21383084	21383143	-	FALSE	hs|22q11.21	ENST00000382932	6545	NM_004173	solute carrier family 7, member 4	GO:0006520|GO:0015802|GO:0006810|GO:0015174|GO:0016021|GO:0003333	NM_004173	THC2475113
600944622T1 NIH_MGC_17 Homo sapiens cDNA clone IMAGE:2960789 3', mRNA sequence [BE300169]	0.00365413	0.473424	9.34194	9.45731	9.26523	9.54929	9.14958	9.20307	10.4968	10.8068	10.2664	10.2727	9.22658	11.23	10.5175	9.52806	AGCCAGGTAGTTCAACTTGTTTCTGTAGAAATTGCCAGAAATGTTGATGCCTTCGCAGCA	chr19	49993510	49993745	-	FALSE	hs|19q13.33	NA	NA	BE300169	NA	NA	NA	THC2565830	NA
DACH1	3.44e-07	27.9215	9.7198	9.88825	9.39304	10.6987	9.73771	10.2426	3.07906	4.5123	4.04642	4.62353	5.0739	6.03134	6.5652	4.87725	Homo sapiens dachshund family transcription factor 1 (DACH1), transcript variant 1, mRNA [NM_080759]	AATATTAATGTCTAGTTGTTCTATATTATAACCACATTTGCGCTCTATGCAAGCCCTTGG	chr13	72012375	72012434	-	FALSE	hs|13q21.33	ENST00000611519	1602	NM_080759	dachshund family transcription factor 1	GO:0046545|GO:0005515|GO:0005667|GO:0030336|GO:0007585|GO:0008283|GO:0060244|GO:0048147|GO:0005730|GO:0005634|GO:0000122|GO:0003677|GO:0043231|GO:0001078|GO:0005737|GO:0010944|GO:0001967|GO:0001075|GO:0005654|GO:0051123	NM_080759	THC2723187
HIC2	0.000594505	0.309391	7.52229	7.49421	7.56291	7.14738	6.71187	7.40488	9.60126	9.39093	9.08233	9.28134	7.24417	9.17204	9.16245	8.04052	hypermethylated in cancer 2 [Source:HGNC Symbol;Acc:HGNC:18595] [ENST00000443632]	GCTGATGGCTGTCTGGGTGACTGTGTTCGTCTTCTCTTCCCCAGGTGACCAGGCATTGAT	chr22	21797004	21797063	+	FALSE	hs|22q11.21	ENST00000443632	23119	AJ313204	hypermethylated in cancer 2	GO:0005886|GO:0005654|GO:0005634|GO:0008022|GO:0045892|GO:0003677|GO:0046872|GO:0006351	NA	NP395300
GGTTTCCCTCTGAATCAGAATCACAGACTAAACAATCACAAATTCTTCTAAAACTAAGTG	0.00265727	0.164209	6.03489	5.75125	6.56399	5.99669	5.7659	5.65654	8.68826	8.74138	8.87669	8.76777	5.94777	9.92104	8.01348	6.16705	chr17	60076688	60076747	+	FALSE	hs|17q23.2	NA	NA	NA	NA	NA	NA	THC2708549	NA	NA
SOX11	0.000465899	16.0162	5.62974	7.22535	7.54717	8.7141	8.1124	10.2443	6.59093	2.71713	4.82424	2.6127	3.45328	4.36364	4.23232	1.75433	Homo sapiens SRY (sex determining region Y)-box 11 (SOX11), mRNA [NM_003108]	AGTACACTCCAATGTCTCTTTTGCAAGAGTTTTTCACAGAGGATTACATTTGTTCAAAAG	chr2	5841428	5841487	+	FALSE	hs|2p25.2	ENST00000322002	6664	NM_003108	SRY (sex determining region Y)-box 11	GO:0003700|GO:0048704|GO:2001111|GO:0006412|GO:0014032|GO:0046887|GO:0060548|GO:0017015|GO:0000976|GO:0001105|GO:0000122|GO:0000979|GO:0048485|GO:0001841|GO:0050672|GO:0061053|GO:0001501|GO:0035332|GO:0021782|GO:0060174|GO:0045893|GO:0001158|GO:0003357|GO:0008135|GO:0008284|GO:0021510|GO:0060425|GO:0005634|GO:2000678|GO:0035914|GO:0045778|GO:0014009|GO:0030513|GO:0005737|GO:0002089|GO:0050769|GO:…	NM_003108	THC2604021
F5	0.000848025	4.29832	7.88146	7.89152	7.82051	6.89483	8.28443	7.48563	1.74227	0.895928	0.914293	3.66243	2.98284	3.35512	8.50869	2.01308	Homo sapiens coagulation factor V (proaccelerin, labile factor) (F5), mRNA [NM_000130]	GATCTGGAAAATACTTGTTTGGGGATCAATAATATGTTTGGGCTATTATCTAATGCTGTG	chr1	169481243	169481302	-	FALSE	hs|1q24.2	NA	2153	NM_000130	coagulation factor V (proaccelerin, labile factor)	GO:0005515|GO:0005794|GO:0004252|GO:0005886|GO:0005507|GO:0005783|GO:0008015|GO:0030168|GO:0005576|GO:0031982|GO:0005615|GO:0016020|GO:0007596|GO:0002576|GO:0006508|GO:0031093	NM_000130	THC2654286
eukaryotic translation elongation factor 1 alpha 1 pseudogene 15 [Source:HGNC Symbol;Acc:HGNC:3198] [ENST00000395772]	0.00162437	0.249767	10.6612	10.9412	10.2297	11.1133	10.4109	10.7351	12.5863	13.9471	13.1369	12.7053	10.5743	11.9215	12.8808	11.6289	CCCTTTCATCAGCCTCTCCAGAATGTCTACAAAATTGGTTGTATTGTTACTGTCCCTGGT	chrX	97645278	97645337	+	FALSE	hs|Xq21.33	ENST00000395772	NA	NA	NA	NA	NA	NA	NA
C3orf22	0.00121905	0.466433	6.82594	6.89708	6.90518	6.89577	6.68275	6.9582	8.12855	8.08383	8.03495	7.79842	7.02869	8.86751	7.64214	7.35469	chromosome 3 open reading frame 22 [Source:HGNC Symbol;Acc:HGNC:28534] [ENST00000318225]	TGGCCATCATAGACCGGGAGTGGTTTGTGGTCCCCCCAAAAAGCTACACCAAGCTAATAA	chr3	126268554	126268613	-	FALSE	hs|3q21.3	ENST00000318225	152065	XM_005247139	chromosome 3 open reading frame 22	NA	XM_005247139	THC2479780
TLR2	0.00685113	2.74282	9.4357	8.56349	8.34194	7.25805	9.44776	7.99351	6.13918	6.44145	5.80541	6.1929	6.75343	8.90829	7.22384	7.58303	Homo sapiens toll-like receptor 2 (TLR2), mRNA [NM_003264]	AAGTCCTAGGTTCCCATATTTAAGACCAGTCTTTGTCTAGTTGGGATCTTTATGTCACTA	chr4	154626406	154626465	+	FALSE	hs|4q31.3	ENST00000260010	7097	NM_003264	toll-like receptor 2	GO:0005515|GO:0032755|GO:0034123|GO:0042995|GO:0006691|GO:0032757|GO:0042497|GO:0042498|GO:0002752|GO:0002755|GO:0042495|GO:0042496|GO:0044130|GO:0031663|GO:0032728|GO:0032868|GO:0038124|GO:0046982|GO:0009986|GO:0032760|GO:0038123|GO:0034134|GO:0042834|GO:0042535|GO:0009636|GO:0032722|GO:0002224|GO:0005887|GO:0045087|GO:0032570|GO:0009897|GO:0008329|GO:0004888|GO:0042346|GO:0008285|GO:0034142|GO:…	NM_003264	THC2617609
RORC	0.0348324	0.420679	8.06567	8.4032	8.87035	8.05302	8.6259	8.17454	8.91853	9.13105	9.07284	8.86696	8.59589	11.5431	9.07186	8.83287	Homo sapiens RAR-related orphan receptor C (RORC), transcript variant 1, mRNA [NM_005060]	TTGGGCTGCAGCGAGCTCATCAGCTCCATCTTTGACTTCTCCCACTCCCTAAGTGCCTTG	chr1	151785478	151785718	-	FALSE	hs|1q21.3	ENST00000318247	6097	NM_005060	RAR-related orphan receptor C	GO:0005515|GO:0010467|GO:0060850|GO:0006805|GO:0006367|GO:0003700|GO:0045598|GO:0003707|GO:0005634|GO:0010906|GO:0048535|GO:0042093|GO:0048541|GO:0008142|GO:0043401|GO:0004879|GO:0033077|GO:0045586|GO:0072539|GO:0070244|GO:0001223|GO:0003677|GO:0019218|GO:0032922|GO:0043565|GO:0042753|GO:0008270|GO:0006468|GO:0005654|GO:0045893|GO:0060612|GO:0030522	NM_005060	THC2470403
PPFIBP1	0.00429306	2.07533	8.46375	9.1325	8.9068	8.74006	8.67772	8.0887	6.681	7.50387	8.8501	7.15706	6.81609	8.53812	6.36225	7.26205	Homo sapiens PTPRF interacting protein, binding protein 1 (liprin beta 1) (PPFIBP1), transcript variant 1, mRNA [NM_003622]	GGAGTAATGTGCCGATTCTGAAGTTGCCACAAAAAATAAGACACTGGTGAATGAGAGTAT	chr12	27845959	27846018	+	FALSE	hs|12p11.22	ENST00000537927	8496	NM_003622	PTPRF interacting protein, binding protein 1 (liprin beta 1)	GO:0005886|GO:0007155|GO:0005925	NM_003622	THC2464100
chloride intracellular channel 1 pseudogene 1 [Source:HGNC Symbol;Acc:HGNC:32691] [ENST00000431907]	0.00386399	0.391406	7.62485	7.9378	7.88668	7.93096	7.60084	7.71146	9.45224	9.50657	9.22556	9.20326	7.6589	9.82913	9.16635	7.76917	CAAAAGAAGTAGATGAAACCAGTGCTGAAGATGAGGGCATCTCGCAGAGGAAGTTTCTGA	chr12	121352649	121352708	+	FALSE	hs|12q24.31	ENST00000431907	NA	NA	NA	NA	NA	NA	NA
dickkopf-like 1 pseudogene 1 [Source:HGNC Symbol;Acc:HGNC:16593] [ENST00000400550]	0.000528484	0.417925	4.74131	4.68788	5.01308	4.74223	4.87528	4.63708	6.34941	6.4709	6.26578	5.70511	5.19467	6.62255	5.90251	5.11538	CTCCAGCCACCTCCATATTGACAAGGTGACCGACAATAAGACAGGAGAGGTGCTGATCTC	chr20	29862242	29862301	+	FALSE	hs|20q11.21	ENST00000400550	NA	NA	NA	NA	NA	NA	NA
lnc-NMNAT2-2	0.00203113	0.419215	7.85051	7.72324	7.84224	7.79696	7.85326	7.92791	9.54255	9.41259	9.26067	9.15809	7.59921	9.4178	9.11605	8.26995	Homo sapiens mRNA; cDNA DKFZp564C196 (from clone DKFZp564C196). [AL050020]	GGAGTTACACTCAAAGTCTTCCCCCTTCTTATCACTCCTGCCGATTTCCCTCTTCCTTTT	chr1	183441181	183441240	-	FALSE	hs|1q25.3	NA	NA	AL050020	lnc-NMNAT2-2:1	NA	NA	THC2608748
SLC6A20	0.00216375	2.88705	7.03497	5.03128	5.9551	6.24444	6.41879	6.72891	3.13347	2.96051	3.92438	3.18417	4.23094	4.24618	7.08579	3.74473	Homo sapiens solute carrier family 6 (proline IMINO transporter), member 20 (SLC6A20), transcript variant 1, mRNA [NM_020208]	TCTCTACAAAAAATTGCCCCAACTACAGTTTGCAACCCCAAACCACATTAGAAGTCTGTG	chr3	45799792	45799851	-	FALSE	hs|3p21.31	ENST00000456124	54716	NM_020208	solute carrier family 6 (proline IMINO transporter), member 20	GO:0016324|GO:0015816|GO:0015171|GO:0005886|GO:0005887|GO:0005328|GO:0015824|GO:0006865|GO:0006836|GO:0055085|GO:0003333|GO:0006811	NM_020208	NA
GUCY2GP	0.047459	0.487266	5.23032	5.41166	5.81199	5.41247	5.13288	5.75982	6.43522	6.49822	6.17581	6.17652	5.82313	8.04994	5.97053	4.79993	Homo sapiens guanylate cyclase 2G, pseudogene (GUCY2GP), non-coding RNA [NR_028134]	CTCCCCTTTGCAAGTCGTCAAGCTCCTCAATGACGTGTACAGTTTATTCGATCACATCAT	chr10	114074029	114074088	-	FALSE	hs|10q25.2	ENST00000490269	390003	NA	guanylate cyclase 2G, pseudogene	NA	NR_028134	THC2662526
PRDM9	3.26e-05	0.306008	3.48889	3.38223	3.78038	3.89671	3.32624	4.24589	5.8003	5.79446	5.8628	5.69584	4.32722	5.37423	5.26963	4.59135	Homo sapiens PR domain containing 9 (PRDM9), mRNA [NM_020227]	GGAGAAGCCCTACGTCTGCAGGGAGGATGAGTAAGTCATTAGTAATAAAACCTCATCTCA	chr5	23527849	23527908	+	FALSE	hs|5p14.2	ENST00000296682	56979	NM_020227	PR domain containing 9	GO:0005694|GO:0010845|GO:0006325|GO:0010844|GO:0006311|GO:0007283|GO:0042800|GO:0006351|GO:0046872|GO:0043565|GO:0045944|GO:0005654|GO:0051568	NM_020227	NP233107
KLK10	0.000112735	3.31673	4.09808	5.14847	5.59966	5.59184	5.14758	5.0072	3.75927	3.73421	3.64199	2.98429	2.98226	3.40393	4.02561	2.37387	Homo sapiens kallikrein-related peptidase 10 (KLK10), transcript variant 1, mRNA [NM_002776]	GCTGTCTACACCCAGATCTGCAAATACATGTCCTGGATCAATAAAGTCATACGCTCCAAC	chr19	51518059	51518118	-	FALSE	hs|19q13.41	ENST00000601467	5655	NM_002776	kallikrein-related peptidase 10	GO:0007049|GO:0004252|GO:0006508|GO:0008236|GO:0005576	NM_002776	NP837646
GRP	0.0488894	3.48984	9.44913	7.50364	7.27242	6.1726	7.88898	5.88625	5.52798	6.18966	6.12064	6.38849	6.02243	6.6498	5.25228	5.91069	Homo sapiens gastrin-releasing peptide (GRP), transcript variant 1, mRNA [NM_002091]	TTTTTTATATCTAGGCTACCTGTTGGTTAGATTCAAGGCCCCGAGCTGTTACCATTCACA	chr18	56897918	56897977	+	FALSE	hs|18q21.32	ENST00000529320	2922	NM_002091	gastrin-releasing peptide	GO:0007165|GO:0007218|GO:0005102|GO:0005576|GO:0005184|GO:0005615	NM_002091	THC2664755
CX3CL1	0.0024949	2.94853	10.8481	10.7434	10.8499	10.909	11.0086	10.2682	8.45078	7.91518	7.20442	7.45771	8.69547	10.3534	10.1845	9.96742	chemokine (C-X3-C motif) ligand 1 [Source:HGNC Symbol;Acc:HGNC:10647] [ENST00000006053]	AGTAGGAAGACTTTGGAAAGACTTTTCCAACCCTCATCACCAACGTCTGTGCCATTTTGT	chr16	57418865	57418924	+	FALSE	hs|16q21	ENST00000006053	6376	AB209037	chemokine (C-X3-C motif) ligand 1	GO:0005515|GO:0008009|GO:0005886|GO:0009986|GO:0030595|GO:0060055|GO:0030593|GO:0019221|GO:0005102|GO:0005576|GO:0006952|GO:0005615|GO:0050902|GO:0045766|GO:0051041|GO:0032914|GO:0006955|GO:0006935|GO:0050729|GO:2001240|GO:0048247|GO:0048246|GO:0016021|GO:0007155	NA	THC2463710
Homo sapiens cDNA: FLJ23525 fis, clone LNG05604. [AK027178]	1.62e-06	0.32436	4.04859	3.60483	4.30462	4.02495	3.63233	3.52487	5.80548	5.44025	5.22766	5.26071	5.19907	5.83519	5.53629	5.61734	ACGAGGCTTGCTTACTTCTATTGTTGGTTGGATTCTTTCCTCTTTTTCTTCTTTTAAAAA	chr3	16429163	16429222	-	FALSE	hs|3p24.3	NA	NA	AK027178	NA	NA	NA	NP1154708	NA
VAPA_MOUSE (Q9WV55) Vesicle-associated membrane protein-associated protein A (VAMP-associated protein A) (VAMP-A) (VAP-A) (33 kDa Vamp-associated protein) (VAP-33), partial (47%) [THC2507281]	0.00322919	2.23932	3.62146	5.08243	3.97057	3.44927	3.88774	3.86486	2.78724	3.02497	2.58354	2.28901	3.32031	2.83234	2.15381	3.73799	CTGCCAACATAAGAATGTGGTTGAACAGAGTCTAACCAGGAAAAGGAGAGATGCGAACTC	chr15	89745108	89745167	-	FALSE	hs|15q26.1	NA	NA	NA	NA	NA	NA	THC2507281	NA
TPM2	0.00177212	2.55283	12.9928	12.2483	12.5406	11.7845	13.1547	11.8666	10.9027	10.2953	9.98158	10.2002	11.4768	11.659	12.0618	11.4244	Homo sapiens tropomyosin 2 (beta) (TPM2), transcript variant Tpm2.1, mRNA [NM_213674]	TGCCAAGGAGGAGAACGTCGAGATTCACCAGACCTTGGACCAGACCCTGCTGGAACTCAA	chr9	35682088	35682147	-	FALSE	hs|9p13.3	ENST00000378292	7169	NM_213674	tropomyosin 2 (beta)	GO:0005862|GO:0030049|GO:0006936|GO:0043462|GO:0003779|GO:0008307|GO:0005829	NM_213674	THC2560693
GPR132	0.0192655	0.372566	6.69732	6.18331	6.43013	6.28315	6.3794	6.20027	8.08729	7.8398	7.6973	7.69694	5.68963	9.05135	7.69374	6.22022	Homo sapiens G protein-coupled receptor 132 (GPR132), transcript variant 2, mRNA [NM_013345]	CCTCCCCTTGAGAGTCATCAGAAAAATACATTAGGAAAATGTGTTTAGAAATAAAAGCAC	chr14	105515899	105515958	-	FALSE	hs|14q32.33	ENST00000551869	29933	NM_013345	G protein-coupled receptor 132	GO:0000082|GO:0007186|GO:0005886|GO:0004930|GO:0016021	NM_013345	THC2688586
Homo sapiens cDNA: FLJ22765 fis, clone KAIA1180. [AK026418]	0.000158648	2.244	13.1788	12.8005	13.4089	13.0959	13.2339	13.5677	12.2808	12.5336	12.323	12.2057	11.7964	10.8211	12.0256	11.9887	TGTATGTATCTGTGTCATTGATCTCCTTAAGAAGAGACTCGTAGATATTGACTGGGAGAC	chr1	147921679	147921738	-	FALSE	hs|1q21.2	NA	NA	AK026418	NA	NA	NA	THC2500821	NA
FOSL1	0.0053976	2.32069	3.00083	3.86633	4.48641	3.24623	3.67632	4.01718	2.40253	1.52063	2.74336	1.89278	3.38783	0.663629	2.83961	3.34774	Homo sapiens FOS-like antigen 1 (FOSL1), transcript variant 1, mRNA [NM_005438]	GACTGACAAACTGGAAGATGAGAAATCTGGGCTGCAGCGAGAGATTGAGGAGCTGCAGAA	chr11	65660706	65660765	-	FALSE	hs|11q13.1	ENST00000312562	8061	NM_005438	FOS-like antigen 1	GO:0005515|GO:0043005|GO:0042542|GO:0008284|GO:0060674|GO:0003700|GO:0008285|GO:0006366|GO:0005634|GO:0051591|GO:0005829|GO:0051091|GO:0006935|GO:0031668|GO:0007612|GO:0034097|GO:0051412|GO:0007565|GO:0043065|GO:0000977|GO:0006357|GO:0042493|GO:0009615|GO:0045787|GO:0001701|GO:0007296|GO:0009612|GO:0042734|GO:0006968|GO:0009629|GO:0032570|GO:0005654	NM_005438	THC2617527
CLDN11	0.00015978	9.94225	7.64859	6.98771	5.91394	6.78413	6.97939	4.58543	3.71641	2.69125	2.87316	1.82317	1.60481	3.69981	5.28518	0.525428	Homo sapiens full length insert cDNA clone YO11A01. [AF085871]	GGAACATCAGTTAGAGTTATACTCACTTGCACTGTTATTTATTGCATAAAGTCTATGTGG	chr3	170151539	170151598	-	FALSE	hs|3q26.2	NA	5010	AF085871	claudin 11	GO:0016338|GO:0005886|GO:0005198|GO:0045178|GO:0016021|GO:0007283|GO:0005923|GO:0008366|GO:0070062|GO:0042802	NA	NA
TRIM41	0.000733234	0.492398	7.78821	7.9796	7.34072	7.54151	7.70299	8.09226	9.72927	8.77598	8.7141	8.32942	8.46589	9.0415	8.27138	8.27791	Homo sapiens tripartite motif containing 41 (TRIM41), transcript variant 1, mRNA [NM_033549]	CTTTGGTGTGTACCTGGACTATGAAGCTGGGCGCCTGGGCTTCTACAACGCAGAGACTCT	chr5	180661616	180661675	+	FALSE	hs|5q35.3	ENST00000515223	90933	NM_033549	tripartite motif containing 41	GO:0005515|GO:0005737|GO:0016567|GO:0016874|GO:0005730|GO:0008270	NM_033549	NP1276938
Homo sapiens mRNA; cDNA DKFZp666D074 (from clone DKFZp666D074) [AL833005]	0.0102186	0.224517	7.14027	7.64888	7.63305	5.98487	6.99597	6.13419	10.5788	7.43674	6.66856	8.51099	7.89463	9.33282	10.3657	8.60104	CGGTAGGCTTATGCGGCACGCTTTCGTTTCCACCGTGGCTACTGCGCTTTGGGAAGGCCA	NA	NA	NA	NA	FALSE	NA	NA	NA	AL833005	NA	NA	NA	THC2503473	NA
ANXA2	0.0108365	2.16849	12.7179	12.5429	12.4083	12.3396	13.6092	11.7549	11.0631	10.0429	10.082	11.4881	12.2563	12.0548	12.4957	11.0198	Homo sapiens annexin A2 (ANXA2), transcript variant 2, mRNA [NM_001002857]	AGGTCTGAATTCAAGAGAAAGTACGGCAAGTCCCTGTACTATTATATCCAGCAAGACACT	chr15	60639880	60641324	-	FALSE	hs|15q22.2	ENST00000421017	302	NM_001002857	annexin A2	GO:0008092|GO:0005515|GO:0006900|GO:0005765|GO:0005615|GO:0035749|GO:0044354|GO:0030199|GO:0005938|GO:0070062|GO:0005811|GO:0042470|GO:0017137|GO:0009986|GO:0005509|GO:0005546|GO:0030496|GO:0043086|GO:0005604|GO:0043234|GO:0045121|GO:0042730|GO:0019897|GO:0048306|GO:0048471|GO:0005886|GO:0072661|GO:0031340|GO:0005634|GO:0051290|GO:0048146|GO:0005544|GO:0007589|GO:0043220|GO:0051099|GO:0019834|GO:…	NM_001002857	NP1175274
LRRTM4	8.99e-06	9.28595	5.24332	4.58125	4.84771	5.05496	3.13097	4.45003	0.855463	0.892003	2.16262	0.837597	0.913157	2.0807	2.07489	0.944195	Homo sapiens leucine rich repeat transmembrane neuronal 4 (LRRTM4), transcript variant 2, mRNA [NM_024993]	TCCCCTTTACAGGAGTATTATGTGGACTACAAGCCTACAAACTCTGAGACCATGGATATA	chr2	77745501	77745560	-	FALSE	hs|2p12	ENST00000409093	80059	NM_024993	leucine rich repeat transmembrane neuronal 4	GO:0030054|GO:0097113|GO:0045211|GO:0032281|GO:0043395	NM_024993	THC2485743
SCARA5	0.00171852	0.225621	8.73933	8.56648	8.75974	8.4253	8.53709	8.78966	11.3518	11.1841	11.0131	11.0982	8.52195	10.9556	11.0357	9.01464	Homo sapiens scavenger receptor class A, member 5 (SCARA5), mRNA [NM_173833]	CATGCTGTCCTGGGGCTCTACCTGCTGGTCTTCCTGATTCTTGTGGGCATCTTCATCTTA	chr8	27823935	27823994	-	FALSE	hs|8p21.1	ENST00000524352	286133	NM_173833	scavenger receptor class A, member 5	GO:0034605|GO:0010468|GO:0006879|GO:0070207|GO:0030193|GO:0009986|GO:0005887|GO:0006898|GO:0070287|GO:0034755|GO:0006897|GO:0005044	NM_173833	THC2501715
PHLDA2	0.0208712	0.391529	7.78576	7.75179	7.94106	6.50268	9.79985	7.71624	8.38676	9.25048	8.2026	9.36404	10.731	9.41961	10.551	9.23028	Homo sapiens pleckstrin homology-like domain, family A, member 2 (PHLDA2), mRNA [NM_003311]	TTTATTTCGCTGGTTCTTTGTAGTCACATATTTTATAGTCTTAATATCTTGTTTTTGCAT	chr11	2949696	2949755	-	FALSE	hs|11p15.4	ENST00000314222	7262	NM_003311	pleckstrin homology-like domain, family A, member 2	GO:0045995|GO:0030334|GO:0010468|GO:0005737|GO:0016020|GO:0009887|GO:0006915|GO:0001890|GO:0070873	NM_003311	THC2463112
C2orf15	0.000445537	3.8395	9.34508	9.14479	9.28037	9.92611	9.07938	9.94809	5.39307	6.60695	8.53947	7.66743	8.34651	6.38821	6.98612	8.0011	Homo sapiens chromosome 2 open reading frame 15 (C2orf15), mRNA [NM_144706]	AAAGGCAGTTGCTTTAGGGTGAAAAAGCCTTCCAAGATTCAAAGCAGATTTCTCTGGTAT	chr2	99767469	99767528	+	FALSE	hs|2q11.2	ENST00000302513	150590	NM_144706	chromosome 2 open reading frame 15	NA	NM_144706	THC2480431
TGGGCAAATGCCCTGATTCCTGCAACTCCGGGGAACCCAAGACTGCGAGACAGGAGAGGG	0.00139176	0.12496	6.36873	6.4552	6.76546	7.2296	6.89093	6.70144	9.75079	10.5739	10.2627	9.99204	6.79485	10.405	9.46527	7.234	chr9	140165537	140165596	-	FALSE	hs|9q34.3	NA	NA	NA	NA	NA	NA	NA	NA	NA
CPVL	1.46e-08	0.131237	9.02303	8.68234	8.04806	8.43147	8.47525	8.85349	12.2228	10.7708	11.5178	11.9176	11.7206	11.3686	11.0864	11.2583	Homo sapiens carboxypeptidase, vitellogenic-like (CPVL), transcript variant 2, mRNA [NM_019029]	ATAAACTACTAGATGGCGACTTAACAAGTGATCCTTCTTACTTCCAGAATGTTACAGGAT	chr7	29105671	29105730	-	FALSE	hs|7p14.3	ENST00000612187	54504	NM_019029	carboxypeptidase, vitellogenic-like	GO:0004185|GO:0006508|GO:0070062	NM_019029	THC2617861
FCN3	0.00244044	0.45266	8.82002	7.95704	8.15887	7.21674	7.66904	8.05975	9.45142	9.19005	9.16087	9.35975	8.14583	9.73356	9.53167	8.41075	Homo sapiens ficolin (collagen/fibrinogen domain containing) 3 (FCN3), transcript variant 1, mRNA [NM_003665]	ATTGTCCACGGTGCCTGGTGGTATGCATCCTGTTACCGATCAAATCTCAATGGTCGCTAT	chr1	27695826	27695885	-	FALSE	hs|1p36.11	ENST00000270879	8547	NM_003665	ficolin (collagen/fibrinogen domain containing) 3	GO:0005515|GO:0006956|GO:0051607|GO:0005581|GO:0046597|GO:0045087|GO:0030246|GO:0072562|GO:0043654|GO:0005576|GO:0003823|GO:0001867	NM_003665	THC2471738
SMPX	0.000449988	3.74966	4.70122	4.6789	4.06551	4.28732	5.60616	3.62977	3.69259	3.31026	2.96907	2.55749	1.47444	1.13103	2.32545	2.68501	Homo sapiens small muscle protein, X-linked (SMPX), transcript variant 1, mRNA [NM_014332]	GTGTGGTTTTGAGGAGGGATATGATTTTATGGAGAATGATATGGCAATGTGCCTAACGAT	chrX	21724230	21724289	-	FALSE	hs|Xp22.12	ENST00000379494	23676	NM_014332	small muscle protein, X-linked	GO:0043034|GO:0006941|GO:0005634|GO:0031430|GO:0005927	NM_014332	THC2472864
TGATAGGTGTGCCCCAGAGAGGAGTATCTTTTACCAGTTGCTCTGGTTGTTTCTGAATTC	0.00104815	0.452835	5.10414	5.03196	5.06741	4.98705	4.78353	5.09387	6.50427	6.62721	6.48903	6.39365	5.27046	6.29122	5.74827	5.21588	chr14	96111168	96111227	+	FALSE	hs|14q32.13	ENST00000602953	NA	NA	NA	NA	NA	THC2633447	NA	NA
SP140	0.000485529	0.467011	6.52952	6.4396	6.83811	6.40508	6.67221	6.63313	8.2235	7.74775	7.29178	7.59921	6.83135	8.20531	7.92852	7.10486	Homo sapiens SP140 nuclear body protein (SP140), transcript variant 1, mRNA [NM_007237]	AGGGGCTTTTCTCTGAGCCTCCTTCATCTGCCCAAAGACAAATCCTCAAAAGGAAATTCA	chr2	231177506	231177565	+	FALSE	hs|2q37.1	ENST00000392045	11262	NM_007237	SP140 nuclear body protein	GO:0005515|GO:0006355|GO:0003700|GO:0005634|GO:0006952|GO:0005635|GO:0003677|GO:0005737|GO:0003682|GO:0016605|GO:0005654|GO:0006338|GO:0008270	NM_007237	NP081779
CCCCCCCTTTTTTTTCCTTAAGCATAATTGTCTTAGGTTTGCCTAGTTTCATTTTAAGAA	0.0057475	0.24776	11.0467	10.8142	11.0779	11.0443	11.2684	10.9418	13.5934	13.4693	13.1322	13.025	10.3683	13.7305	13.2231	11.2536	chr12	46348716	46348775	+	FALSE	hs|12q12	NA	NA	NA	NA	NA	NA	THC2503530	NA	NA
C6orf132	0.00143497	86.0154	8.30616	8.53116	8.40523	8.55571	14.2606	8.70309	3.80474	1.40807	2.23275	7.15041	5.43346	0.659248	6.40255	5.30959	Homo sapiens chromosome 6 open reading frame 132 (C6orf132), mRNA [NM_001164446]	GGCCAGGTCTCATATGGGATTTGGAGAAGGCATTTTTCCTAACACTGATACTACAAGTCA	chr6	42070579	42070638	-	FALSE	hs|6p21.1	NA	647024	NM_001164446	chromosome 6 open reading frame 132	NA	NM_001164446	THC2608413
heat shock 70kDa protein 8 pseudogene 18 [Source:HGNC Symbol;Acc:HGNC:44933] [ENST00000439846]	0.000480672	0.473225	6.99485	7.28265	6.96266	7.32923	6.67991	6.5816	7.24206	7.82068	8.49674	7.87684	8.28754	8.69563	7.46682	8.14776	CAGCATGTAAAAATAGAGGTAATTGCCAATGATCAGGGAAATTGAATCACTCCAAGCTAT	chr3	19984686	19984745	-	FALSE	hs|3p24.3	ENST00000439846	NA	BC043212	NA	NA	NA	THC2633502	NA
ENAH	0.00286369	2.01399	6.89256	6.63723	6.92014	6.8056	7.12021	6.74551	5.59966	6.29798	6.08563	5.96473	5.74335	4.03552	6.2216	5.90202	Homo sapiens enabled homolog (Drosophila) (ENAH), transcript variant 1, mRNA [NM_001008493]	CTTGCTTGACTCAAGTTGTTTGAAAATCTGAATTAAACAGGATCTCATTGTCAGGAAACA	chr1	225675094	225675153	-	FALSE	hs|1q42.12	ENST00000366844	55740	NM_001008493	enabled homolog (Drosophila)	GO:0005515|GO:0050852|GO:0001725|GO:0017124|GO:0030054|GO:0005886|GO:0050699|GO:0045202|GO:0001843|GO:0046907|GO:0003779|GO:0030175|GO:0030027|GO:0005829|GO:0005737|GO:0007411|GO:0008154|GO:0005925	NM_001008493	THC2526906
FOXB1	0.0229942	0.356849	10.1935	10.2106	10.348	10.2	10.6021	10.3644	12.1522	12.3103	11.6706	11.5859	9.18172	12.6829	12.0771	10.408	Homo sapiens forkhead box B1 (FOXB1), mRNA [NM_012182]	GCCACGCGGCGGGCCAAACGCTGCCCGCCATCCCCGTGCCCATTAAGCCCACGCCGGCCG	chr15	60297908	60297967	+	FALSE	hs|15q22.2	ENST00000396057	27023	NM_012182	forkhead box B1	GO:0033504|GO:0006357|GO:0006366|GO:0021510|GO:0061379|GO:0000981|GO:0001756|GO:0001655|GO:0005634|GO:0061377|GO:0021855|GO:0061374|GO:0043565|GO:0021767|GO:0021794|GO:0022029|GO:0043524|GO:0007412|GO:0061381|GO:0007595|GO:0008542|GO:0030901|GO:0061030	NM_012182	THC2485704
CAGCGGGGCTCCGGACCGAGGACAGCCTCCGAGCTCCCCCATGCCACGGCGTCAGGCAGA	0.00326265	0.449032	7.63675	7.25782	7.60281	7.26918	7.28899	7.1152	8.73972	8.93455	8.60922	8.52754	6.9982	9.11351	8.57469	7.76397	chr7	710467	710526	+	FALSE	hs|7p22.3	NA	NA	NA	NA	NA	NA	NA	NA	NA
CGGGGGCCTGACCCCGACCCCCGCATATACCAGCAACGGTGCGCCCGGGGGCCTGACCCC	0.0381206	0.418826	11.005	10.5419	11.1225	11.1844	11.1434	11.1666	12.4024	12.5849	12.1338	12.2456	9.8571	13.3451	12.5576	10.9971	chr1	844391	844450	-	FALSE	hs|1p36.33	NA	NA	NA	NA	NA	NA	NA	NA	NA
EPHX1	0.000554989	3.53214	10.0461	10.0591	9.97472	9.04861	9.64548	9.10138	6.6846	6.40192	7.15671	6.35542	7.38133	8.75998	9.23848	8.1029	Homo sapiens epoxide hydrolase 1, microsomal (xenobiotic) (EPHX1), transcript variant 1, mRNA [NM_000120]	CCCTTTTGAGCTATTGCACACGCCTGAAAAGTGGGTGAGGTTCAAGTACCCAAAGCTCAT	chr1	226032883	226032942	+	FALSE	hs|1q42.12	ENST00000614058	2052	NM_000120	epoxide hydrolase 1, microsomal (xenobiotic)	GO:0014070|GO:0033961|GO:0019439|GO:0005789|GO:0009636|GO:0016021|GO:0004301	NM_000120	THC2514640
ASTN1	0.0255305	2.343	11.1781	11.3389	11.0743	11.1896	10.787	10.3817	5.79262	5.81276	10.8054	10.6323	11.101	9.9651	8.59983	5.36108	Homo sapiens astrotactin 1 (ASTN1), transcript variant 1, mRNA [NM_004319]	ATGAACCACTGTAATAGCATTAGACTTTTAATTGAGTGTGCAATCGTTTTCCATGGAGTT	chr1	176830422	176830481	-	FALSE	hs|1q25.2	ENST00000361833	460	NM_004319	astrotactin 1	GO:0007626|GO:0016021|GO:0005575|GO:0001764|GO:0009897|GO:0007158|GO:0005768	NM_004319	THC2602836
TES	5.99e-05	5.41075	9.22126	8.81476	10.0559	9.60565	9.68624	8.63631	6.26462	5.50176	5.50723	6.0507	6.71935	8.65568	7.49641	6.49531	Homo sapiens testis derived transcript (3 LIM domains) (TES), transcript variant 2, mRNA [NM_152829]	AAATGCCTCATTGGGCAGAAGTTCATGCCAGTAGAAGGGATGGTTTTCTGTTCAGTGGAA	chr7	115897456	115897515	+	FALSE	hs|7q31.2	ENST00000496912	26136	NM_152829	testis derived transcript (3 LIM domains)	GO:0043234|GO:0005737|GO:0030054|GO:0008285|GO:0005886|GO:0008270|GO:0005634|GO:0005925	NM_152829	THC2466351
tumor protein, translationally-controlled 1 pseudogene 8 [Source:HGNC Symbol;Acc:HGNC:24088] [ENST00000510120]	0.00460176	0.126374	10.6598	10.884	10.7162	11.4688	10.8336	10.9434	14.0613	14.6364	14.5159	14.2462	10.14	14.1367	14.1225	11.1622	ACTACCGTAAGGATGGTCAGTATGACCCCATATATGATTTTTTAAGGAATGGTTTAGAAA	chr8	36746755	36746814	+	FALSE	hs|8p11.23	ENST00000510120	NA	AF300871	NA	NA	NA	NP287872	NA
MATN1-AS1	1.41e-07	0.291154	3.63841	3.71756	3.71565	3.33273	3.51233	3.93645	5.75699	5.0534	5.30217	5.13937	5.8931	4.96114	5.26703	5.77802	Homo sapiens MATN1 antisense RNA 1 (MATN1-AS1), long non-coding RNA [NR_034182]	CTCACGGGGCATCATGGGAATCAAAGTGTCTGCAGGCAAAGCTCATAACTCCGAGCGGGA	chr1	31194150	31194209	+	FALSE	hs|1p35.2	NA	100129196	NR_034182	MATN1 antisense RNA 1	NA	NR_034182	THC2477814
OXCT2	0.00598849	0.39061	9.95449	9.56968	9.67759	9.19206	8.98147	9.39443	11.3853	11.0479	11.0556	11.3465	9.26666	10.5883	11.2732	9.32237	Homo sapiens mRNA for FLJ00030 protein, partial cds. [AK024440]	GCTCCATTGCACTCCCATCTTTATCATGAAAGCCGGGAAATAACCTACATGTCTATGATG	chr1	39985653	39985712	+	FALSE	hs|1p34.3	NA	64064	AK024440	3-oxoacid CoA transferase 2	GO:0005739|GO:0046952|GO:0031514|GO:0008260	NA	THC2609194
TCAAAACTCACTGTCAGTCCTTTAATTTTCCTCAAAATAAAAGTTTTCTTCTGGTGTCCG	0.000918064	0.350023	6.22938	7.53836	6.89396	6.4461	7.19204	7.13204	9.49487	7.80361	8.12366	8.02273	8.65275	9.17184	7.89192	7.40742	chr3	13455400	13455459	-	FALSE	hs|3p25.1	NA	NA	NA	NA	NA	NA	THC2707492	NA	NA
PRSS22	1.69e-05	4.72711	8.59929	8.88541	8.3345	8.30471	8.83232	7.99798	5.38916	6.12706	6.18141	5.89086	5.57314	5.46206	7.90019	5.62659	Homo sapiens protease, serine, 22 (PRSS22), mRNA [NM_022119]	GGGCCCCAGCGCTTTTGTGTATATAAATGTTAATGATTTTTATAGGTATTTGTAACCCTG	chr16	2902781	2902840	-	FALSE	hs|16p13.3	ENST00000575164	64063	NM_022119	protease, serine, 22	GO:0004252|GO:0006508|GO:0005576	NM_022119	THC2473191
PPBPP2	0.00275538	3.35045	2.61631	5.10575	3.7775	4.39439	3.83988	3.82294	2.05644	0.902858	2.46859	1.39127	2.18324	0.525107	3.66431	3.07952	Homo sapiens pro-platelet basic protein pseudogene 2 (PPBPP2), non-coding RNA [NR_026769]	ACAAACTAAGAGAAACATAGGGAAAAGGAAATGTAGAGATCTGTTCCTTGCACCTGTTGC	chr4	74920392	74920451	-	FALSE	hs|4q13.3	ENST00000513150	10895	NR_026769	pro-platelet basic protein pseudogene 2	NA	NR_026769	NP096129
DCAF10	0.0351864	0.479876	3.64114	4.11321	4.06978	4.63833	4.45612	4.94354	5.52857	5.82207	6.43598	5.98349	3.82843	4.5393	5.1126	4.35409	Homo sapiens DDB1 and CUL4 associated factor 10 (DCAF10), transcript variant 1, mRNA [NM_024345]	TTTTGTCTCATTATAAAATAAGATTATATGAAATTTATATTCTAGAAATGATTCCAAATC	chr9	37867002	37867061	+	FALSE	hs|9p13.2	ENST00000242323	79269	NM_024345	DDB1 and CUL4 associated factor 10	GO:0016567|GO:0080008	NM_024345	THC2680888
ZNF521	0.00016065	7.1984	9.81462	9.81668	9.29094	10.2118	9.51922	9.28058	5.44509	5.16632	4.38846	5.82475	5.47029	8.27917	8.41877	6.05168	Homo sapiens zinc finger protein 521 (ZNF521), mRNA [NM_015461]	GAAGCTTTGAGTGTTCAAGGTTTTCCTTAATGATTTCACGCAGCCAAATTCTTGAATCAG	chr18	22641994	22642053	-	FALSE	hs|18q11.2	ENST00000361524	25925	NM_015461	zinc finger protein 521	GO:0006355|GO:0019904|GO:0007275|GO:0005634|GO:0003677|GO:0046872|GO:0030154|GO:0006351	NM_015461	THC2462504
BHMT	0.00116469	2.1145	6.50835	5.91294	5.39361	5.86019	5.85224	5.49263	4.0948	5.94954	4.30684	4.9087	4.30287	4.74625	4.04714	4.97853	Homo sapiens betaine--homocysteine S-methyltransferase (BHMT), mRNA [NM_001713]	TAGTGCCTCTGGGCCATAAGGCTGAGCAGAGTGAGCTTGTATTAGTTGGTAGCTTTTAAA	chr5	78427789	78427848	+	FALSE	hs|5q14.1	ENST00000274353	635	NM_001713	betaine--homocysteine S-methyltransferase	GO:0010243|GO:0047150|GO:0044281|GO:0050666|GO:0032403|GO:0033528|GO:0005829|GO:0034641|GO:0043234|GO:0005737|GO:0000096|GO:0046500|GO:0006479|GO:0008270|GO:0071267|GO:0006579|GO:0008898|GO:0006577|GO:0070062	NM_001713	THC2467969
AAGGGGGAGAAGGCATTTTATAAAAGGACATCACTTCTAATTCTTTTTATTCAAATTAAA	0.000605141	3.28881	7.97779	8.08297	7.73027	8.391	7.95561	8.91853	5.41753	5.19797	6.18592	4.94208	6.97891	5.92053	5.93599	8.22982	chr15	70341285	70341344	+	FALSE	hs|15q23	NA	NA	NA	NA	NA	NA	NA	NA	NA
LOC102723335	0.000811405	0.334932	6.74846	6.52021	6.44168	6.10481	6.09247	6.79831	8.2152	8.29135	8.53245	8.18443	6.79071	8.69722	7.85844	6.624	PREDICTED: Homo sapiens uncharacterized LOC102723335 (LOC102723335), ncRNA [XR_424678]	ATGCCTTCTGTCCATACAGCCCTTTCCAAGACTCAGCTATTTGTGATCACCCCCAAATGT	chr15	101099897	101099956	+	FALSE	hs|15q26.3	NA	102723335	XR_424678	uncharacterized LOC102723335	NA	XR_424678	THC2615579
GGGCTGTGTGTGTGTCTGTTCTCAAAGAAATGGCTTCTTTGTACATGGTGGCTACCATTA	0.00734377	0.494595	11.8156	12.811	13.1465	12.8789	12.9399	13.413	14.1954	14.0994	13.979	14.02	14.5378	12.5784	13.8219	13.4213	chr1	20685916	20685975	+	FALSE	hs|1p36.12	NA	NA	NA	NA	NA	NA	THC2667666	NA	NA
Homo sapiens cDNA FLJ38922 fis, clone NT2NE2011691. [AK096241]	0.00341881	0.40269	9.75511	9.55141	9.88991	9.72452	9.88715	9.81007	11.4176	11.5606	11.3549	11.1511	9.49666	11.3509	11.2467	9.93995	CCAAGTGCCCTTTCCCCCAACCTTTTGTTGGTTTACGAGCTCTCAATTCTAACCTCCTAG	chr5	179240937	179240996	+	FALSE	hs|5q35.3	NA	NA	AK096241	NA	NA	NA	THC2502689	NA
INHBC	0.0020625	0.221833	8.40617	8.19863	8.40755	8.25473	8.51407	8.35514	11.1394	10.9982	10.7846	10.6641	8.07846	10.7838	10.7017	8.84763	Homo sapiens inhibin, beta C (INHBC), mRNA [NM_005538]	AGCCCCTGTCCTTCTTAGTTGTCCAGGTGAACTACTAAAGCTCTCTTTGCATACCTTCAT	chr12	57844323	57844382	+	FALSE	hs|12q13.3	ENST00000309668	3626	NM_005538	inhibin, beta C	GO:0010862|GO:0005576|GO:0042981|GO:0005125|GO:0005160|GO:0005615|GO:0060395|GO:0005179|GO:0043408|GO:0048468|GO:0008083|GO:0040007|GO:0070062	NM_005538	THC2482175
SF3A1	0.000892939	0.484043	9.77001	9.3621	9.18273	9.51337	8.6523	9.63761	10.1161	10.8789	10.9597	10.844	9.77677	10.2571	10.3184	9.86669	Homo sapiens splicing factor 3a, subunit 1, 120kDa (SF3A1), mRNA [NM_005877]	TGACGTTTCTTTAAAATGTATGTATTTAACAAATACTTAATTGTATTAAGGTCATGTACC	chr22	30729736	30729795	-	FALSE	hs|22q12.2	ENST00000215793	10291	NM_005877	splicing factor 3a, subunit 1, 120kDa	GO:0008380|GO:0006397|GO:0005515|GO:0010467|GO:0000398|GO:0003723|GO:0005684|GO:0005681|GO:0005654|GO:0071013|GO:0000389	NM_005877	THC2503173
VIM	0.0169622	2.49502	15.024	14.1968	13.5115	13.319	14.681	12.6222	12.1299	11.3325	11.0009	12.1816	12.0213	14.1649	13.8704	12.4746	Homo sapiens vimentin (VIM), mRNA [NM_003380]	CCAGATGCGTGAAATGGAAGAGAACTTTGCCGTTGAAGCTGCTAACTACCAAGACACTAT	chr10	17277185	17277244	+	FALSE	hs|10p13	ENST00000544301	7431	NM_003380	vimentin	GO:0005882|GO:0005515|GO:0003725|GO:0043005|GO:0005212|GO:0045109|GO:0005886|GO:0070307|GO:0006928|GO:0060395|GO:0006921|GO:0005829|GO:0042802|GO:0005737|GO:0001948|GO:0097110|GO:0060020|GO:0016032|GO:0045111|GO:0005856|GO:0031252|GO:0070062|GO:0005777|GO:0030049|GO:0006915|GO:0008022|GO:0010628|GO:0014002|GO:0005200|GO:0010977|GO:0005925	NM_003380	THC2515676
CXCL12	0.00978911	0.363181	7.73736	7.6589	6.83049	6.04392	7.93991	6.77806	7.64969	8.20116	7.41857	9.96324	8.02253	8.77143	9.61862	8.41896	Homo sapiens chemokine (C-X-C motif) ligand 12 (CXCL12), transcript variant 2, mRNA [NM_000609]	CATACCAATGAAAAAATGTATATGCACTTATAATTTTCCTAATAAAGTTCTGTACTCAAA	chr10	44865617	44865676	-	FALSE	hs|10q11.21	ENST00000374429	6387	NM_000609	chemokine (C-X-C motif) ligand 12	GO:0008344|GO:0009408|GO:0008015|GO:0031100|GO:0048842|GO:0043434|GO:0090280|GO:0005615|GO:0007281|GO:0022029|GO:0006955|GO:0042098|GO:0006935|GO:0007155|GO:0070062|GO:0009314|GO:0001666|GO:0008009|GO:2000406|GO:0001569|GO:0008354|GO:0070098|GO:0001667|GO:0006874|GO:0005102|GO:0042379|GO:0005576|GO:0045236|GO:0009615|GO:0045785|GO:0009612|GO:0050930|GO:0007165|GO:0008045|GO:0001938|GO:0007186|GO:…	NM_000609	THC2542832
TCTCCAGTCCAGAAAGGGCCTGTCCAGACCCGCTGAGGACCACTGGACACCACCCACAAT	0.0157859	0.359469	5.37208	4.96166	4.88883	5.66385	5.54554	5.27697	6.4191	6.42337	6.41629	6.51183	5.36212	8.60499	5.67078	5.77312	chr21	44018581	44018640	+	FALSE	hs|21q22.3	NA	NA	NA	NA	NA	NA	NA	NA	NA
CCCCCATCAGGTTGCCAAAAATTAGAATAGGTTTTGTGTTTTTTGGTGTTGTTTGTTTGA	0.000673191	0.475577	4.49228	4.48385	4.53431	4.39971	4.12314	4.39111	6.01141	5.63623	5.50542	5.39612	4.69501	6.00232	5.34889	4.65054	chr8	129080704	129080763	+	FALSE	hs|8q24.21	NA	NA	NA	NA	NA	NA	NA	NA	NA
PBLD	0.00451076	0.350658	7.23466	6.98065	7.37407	7.36785	7.34389	7.4785	9.19005	9.22913	8.99943	8.88889	6.93514	9.16906	9.16653	7.36479	Homo sapiens phenazine biosynthesis-like protein domain containing (PBLD), transcript variant 2, mRNA [NM_001033083]	CTCCTCGTCCGCCTCAGTGACGTTTACAACAGGTCGTTTCTGGAGAACCTGAAAGTGAAC	chr10	70048391	70048719	-	FALSE	hs|10q21.3	ENST00000495025	64081	NM_001033083	phenazine biosynthesis-like protein domain containing	GO:0005515|GO:0009058|GO:0050680|GO:0010719|GO:0060394|GO:0060392|GO:0003674|GO:0005737|GO:0030277|GO:0016853|GO:0030512|GO:0010633|GO:0070062	NM_001033083	THC2576209
TOX	2.57e-07	20.2756	6.37747	7.92148	7.38241	8.38822	7.58685	7.28204	2.68455	3.05575	2.36391	3.02194	3.45511	3.67024	4.11902	3.03645	Homo sapiens thymocyte selection-associated high mobility group box (TOX), mRNA [NM_014729]	TTGGAAACCAAGAGAATGGCTGATGTCTCTTTCTTGGAATATGTGAAATAAATTTAGCAG	chr8	59718522	59718581	-	FALSE	hs|8q12.1	ENST00000361421	9760	NM_014729	thymocyte selection-associated high mobility group box	GO:0006355|GO:0003682|GO:0006338|GO:0005634|GO:0003677	NM_014729	THC2504557
RHEBL1	0.00380054	0.456015	6.22824	5.4657	6.29557	5.05583	4.77663	5.24711	6.95395	6.56881	6.94784	6.50478	6.72614	6.86751	6.90262	6.50901	Homo sapiens Ras homolog enriched in brain like 1 (RHEBL1), transcript variant 1, mRNA [NM_144593]	TTCATCATTGGGGTCCATGGTTATGTGCTTGTGTATTCTGTCACCTCTCTGCATAGCTTC	chr12	49460312	49460457	-	FALSE	hs|12q13.12	ENST00000550797	121268	NM_144593	Ras homolog enriched in brain like 1	GO:0031929|GO:0006184|GO:0005737|GO:0051092|GO:0016020|GO:0007264|GO:0005525|GO:0046872|GO:0012505	NM_144593	THC2613646
PCDH11Y	4.06e-05	9.8122	4.28662	5.54933	4.03208	6.4977	5.13542	4.75081	0.598352	3.25023	2.33922	2.6966	0.580503	0.605554	2.27363	0.611772	Homo sapiens protocadherin 11 Y-linked (PCDH11Y), transcript variant c, mRNA [NM_032973]	CTTTTTATTATGACCATTAGAAACTATTTTGAATGTTTCCAACTGGCTCAATTGGCTGGG	chrY	5609623	5609682	+	FALSE	hs|Yp11.2	ENST00000400457	83259	NM_032973	protocadherin 11 Y-linked	GO:0005886|GO:0005509|GO:0016021|GO:0007156	NM_032973	NA
MUM1	0.00240249	4.42674	13.9917	13.528	13.7982	13.7774	13.5486	14.0245	11.5937	13.0935	10.2989	8.25473	9.3754	11.911	12.8261	8.78198	Homo sapiens melanoma associated antigen (mutated) 1 (MUM1), transcript variant 1, mRNA [NM_032853]	CATTGTGGGTTCCTGAGAGTAGGACACATTGCCATGGTTTTGTGGGAATCACGCGCCCCT	chr19	1378272	1378331	+	FALSE	hs|19p13.3	ENST00000591453	84939	NM_032853	melanoma associated antigen (mutated) 1	GO:0005515|GO:0006281|GO:0006325|GO:0031491|GO:0005634	NM_032853	THC2462943
VPS37B	4.99e-05	2.88173	10.7791	10.1323	10.9982	10.028	10.2297	10.2474	8.29853	8.63156	8.48715	8.24365	9.36149	8.61744	8.91508	9.92653	Homo sapiens vacuolar protein sorting 37 homolog B (S. cerevisiae) (VPS37B), mRNA [NM_024667]	AGGACGATTCACTGCCATGCCAGTCAGGCGGGCTTGCCATGTTCTGTGAATCTCGAGTGA	chr12	123350080	123350139	-	FALSE	hs|12q24.31	ENST00000267202	79720	NM_024667	vacuolar protein sorting 37 homolog B (S. cerevisiae)	GO:0005515|GO:0000813|GO:0019082|GO:0019058|GO:0030496|GO:0019068|GO:0015031|GO:0016197|GO:0031902|GO:0016032|GO:0061024|GO:0010008|GO:0070062|GO:0048306	NM_024667	THC2466446
MTA1	0.0046468	0.300278	9.89657	9.90046	10.1909	9.95664	10.037	9.89134	12.2792	12.3762	11.5091	11.5877	9.44843	12.2681	11.8502	10.4075	Homo sapiens metastasis associated 1 (MTA1), transcript variant 1, mRNA [NM_004689]	CCCGCCAAGGTGGCCCCCGTCATCAACAACGGCTCCCCCACCATCCTGGGCAAGCGCAGC	chr14	105932831	105932890	+	FALSE	hs|14q32.33	ENST00000438610	9112	NM_004689	metastasis associated 1	GO:0005515|GO:0045475|GO:0003700|GO:0006325|GO:0005634|GO:0005635|GO:0043231|GO:0006302|GO:0005737|GO:0016581|GO:0010212|GO:0032496|GO:0001046|GO:0043153|GO:0001103|GO:0006355|GO:0003714|GO:0005874|GO:0003713|GO:0050727|GO:0001047|GO:0006351|GO:0032922|GO:0007165|GO:0003682|GO:0040029|GO:0043161|GO:0005654|GO:0008270	NM_004689	THC2535572
DNAH2	0.00045192	0.230777	4.58543	4.06901	5.159	4.66039	4.22207	4.75381	6.99868	7.68229	7.38297	6.95241	4.82975	5.85448	6.40968	5.82145	Homo sapiens dynein, axonemal, heavy chain 2 (DNAH2), transcript variant 2, mRNA [NM_001303270]	TCCTCTCTTCATTATTCTCTCTCTTTCTCATACAATATGTTTGCTATCGTCATTTTACTT	chr17	7646539	7646598	+	FALSE	hs|17p13.1	ENST00000570791	146754	NM_001303270	dynein, axonemal, heavy chain 2	GO:0001539|GO:0008152|GO:0005874|GO:0005858|GO:0003777|GO:0016887|GO:0005524|GO:0007018	NM_001303270	THC2484342
CGAT2_HUMAN (Q8N6G5) Chondroitin beta-1,4-N-acetylgalactosaminyltransferase 2 (GalNAcT-2) (beta4GalNAcT-2) , partial (34%) [THC2687779]	0.00696527	0.105419	4.37526	3.77037	3.58468	4.17478	4.25403	4.42542	8.36885	8.25434	7.83001	7.93525	3.12403	5.38864	7.1051	4.99181	GTGAAGAAGAAATTATATTCAGATAGGACTGCACTATGTGTGATTATTTGTCACACATGG	chrX	100213690	100213749	+	FALSE	hs|Xq22.1	NA	NA	NA	NA	NA	NA	THC2687779	NA
CCACTGGAAAAATGTTTGTTCTTTTAGATGGAGAAGGAAAAAATGGAACCATCAAACTGA	0.000459706	0.405786	6.91171	7.6205	6.71053	7.71833	7.00506	7.31009	8.49272	8.79725	9.42491	8.56263	7.66134	8.78904	8.11943	7.83535	chr2	175366786	175366845	+	FALSE	hs|2q31.1	ENST00000313760	NA	NA	NA	NA	NA	NA	NA	NA
NPAS1	0.00247873	2.16391	5.70585	4.79262	4.72278	5.18967	4.49749	5.63364	3.58676	3.94922	3.3117	3.8897	5.04911	3.34397	3.36528	4.74014	Homo sapiens neuronal PAS domain protein 1 (NPAS1), mRNA [NM_002517]	GGGCCCGCGGGCACCAGGCTGCCGCGGAAGGGGGACTGAGGACTGGCAGAGCTGCCGGCG	chr19	47548871	47548930	+	FALSE	hs|19q13.32	ENST00000449844	4861	NM_002517	neuronal PAS domain protein 1	GO:0001964|GO:0042711|GO:0007165|GO:0003700|GO:0046983|GO:0005634|GO:0004871|GO:0000122|GO:0007417|GO:0003677|GO:0006351	NM_002517	THC2646751
olfactory receptor, family 7, subfamily E, member 22 pseudogene [Source:HGNC Symbol;Acc:HGNC:8394] [ENST00000478335]	0.000771825	0.3971	8.60302	8.59589	9.03315	8.55205	8.87897	8.97055	10.776	10.4714	10.0417	10.08	8.63607	10.2474	10.2361	9.57032	AATTTTTGGCCATCTGTCACCCCCTGCACTACCCAGTCATCGTGAATCCTCACTTCTGTG	chr3	75406181	75406240	-	FALSE	hs|3p12.3	ENST00000478335	NA	NA	NA	NA	NA	THC2560938	NA
GATAACAGTGTTTCAAATGCCGTGAAACATGGCATCATGAGGTGACGACAGTATAACCAT	2.96e-05	2.10136	8.29327	8.41373	8.39713	8.38199	8.13999	7.80485	7.42109	6.81879	7.16505	7.18778	7.10704	7.81217	6.50362	7.07634	NA	NA	NA	NA	FALSE	NA	NA	NA	NA	NA	NA	NA	NA	NA	NA
BICD2	3.09e-05	0.237567	4.28219	4.04393	3.85716	4.15061	4.28364	3.70435	6.24393	6.51708	5.81975	6.04116	6.97258	4.74409	5.50542	6.28044	Homo sapiens bicaudal D homolog 2 (Drosophila) (BICD2), transcript variant 2, mRNA [NM_015250]	TGAAGAGCAAGTATGAGAATGAGAAGGCCATGGTTACCGAGACCATGATGAAGCTGCGCA	chr9	95480146	95480205	-	FALSE	hs|9q22.31	ENST00000375512	23299	NM_015250	bicaudal D homolog 2 (Drosophila)	GO:0005515|GO:0017137|GO:0005737|GO:0005794|GO:0005886|GO:0072385|GO:0031410|GO:0005856|GO:0072393	NM_015250	THC2467042
DDX10	0.00977873	0.472604	6.25039	6.30444	6.93497	6.65002	6.4677	6.67459	6.95659	7.84076	8.48291	7.85282	6.54972	8.27691	7.37776	6.5177	Homo sapiens DEAD (Asp-Glu-Ala-Asp) box polypeptide 10 (DDX10), mRNA [NM_004398]	GGATTTGACTTTAAAGAGGAGAAAACATTACAGAAGAAAGAACCTTCTAAATCCAGCATC	chr11	108594167	108709199	+	FALSE	hs|11q22.3	ENST00000417796	1662	NM_004398	DEAD (Asp-Glu-Ala-Asp) box polypeptide 10	GO:0003724|GO:0008152|GO:0005524	NM_004398	THC2464486
BMP6	2.14e-05	8.33812	9.07486	9.69351	9.25807	9.54434	9.60126	8.97268	5.46058	5.08777	4.7904	5.23481	5.44509	7.44246	7.54197	6.54303	Homo sapiens bone morphogenetic protein 6 (BMP6), mRNA [NM_001718]	TGGTTCTCTGCCTTTTTACTATACAGCATACCACGCCACAGGGTTAGAACCAACGAAGAA	chr6	7881395	7881454	+	FALSE	hs|6p24.3	ENST00000283147	654	NM_001718	bone morphogenetic protein 6	GO:0051216|GO:0001654|GO:0050714|GO:0060395|GO:0005615|GO:0006879|GO:0030539|GO:0005737|GO:0006955|GO:0006954|GO:0045944|GO:0043408|GO:0010039|GO:0032026|GO:0032332|GO:0032526|GO:0050679|GO:0014823|GO:0030501|GO:0046982|GO:0001822|GO:0031988|GO:0010862|GO:0051384|GO:0042981|GO:0003323|GO:0030509|GO:2000860|GO:0005160|GO:0005125|GO:0001649|GO:0045669|GO:0001958|GO:0001501|GO:0001938|GO:0070700|GO:…	NM_001718	THC2474595
ae38f11.x5 Gessler Wilms tumor Homo sapiens cDNA clone IMAGE:898125 3', mRNA sequence [AI732190]	3.8e-05	0.280981	4.17509	4.13877	4.36153	4.16016	4.36762	4.6499	6.83225	6.63083	6.14584	6.12863	5.22504	5.9185	6.35601	5.13588	GTGGTTGTGTGTGTATCTTAGATAGCTGGAACCAATTTTAATAGCCTTCTGAACTTTACA	chr21	29475014	29475073	-	FALSE	hs|21q21.3	NA	NA	AI732190	NA	NA	NA	THC2496912	NA
mitotic spindle organizing protein 2A [Source:HGNC Symbol;Acc:HGNC:33187] [ENST00000491265]	0.00158291	0.279548	8.4899	8.28215	8.50089	8.02109	8.08666	7.96341	10.7717	10.6054	10.2974	10.3351	8.29707	9.88443	10.2156	8.44413	CTCTCTTGCTGCCTGTTCTCTCCTTTTGCAGGTTGCGTTTATTGGCTTATCTCTGGGGGT	chr2	132248257	132248316	-	FALSE	hs|2q21.1	ENST00000491265	NA	XM_005263741	NA	NA	XM_005263741	THC2478932	NA
UG0898H09	0.00714416	2.58326	5.04646	4.1076	4.87966	3.11392	4.57273	3.41964	0.766208	0.765843	0.758135	0.72826	0.794144	4.5025	4.93255	0.795771	Homo sapiens uncharacterized LOC643763 (UG0898H09), long non-coding RNA [NR_027378]	GGGAAATCCAAACTGAAAGGAATTAATATCCACATCAGTTCCTAAAGCAAAATGCCTGAC	chr8	63894015	63894074	+	FALSE	hs|8q12.3	ENST00000622794	643763	NR_027378	uncharacterized LOC643763	NA	NR_027378	THC2567047
GAAAGGACTTGCTTTACAGGTGGTCCCTCTTCTGGCTGGGTTTCAGTTAATTCTGAATTA	0.00114234	0.296566	7.64423	7.99408	8.20029	7.67534	7.86735	8.07626	10.1079	10.0005	10.0151	9.95232	7.78189	9.85836	9.8213	8.42587	chr6	137246605	137246664	-	FALSE	hs|6q23.3	NA	NA	NA	NA	NA	NA	NA	NA	NA
GAACCATGCTGTAATAACCACCAGTGTGGGTAATCAAAAAGGGTCTTTGACATTTAAGAG	0.00134812	3.13906	7.97839	6.9266	7.49246	6.56995	6.53601	6.11195	4.27837	6.1518	3.94777	6.34	5.61756	5.09387	4.77008	5.553	chr5	136313950	136314009	+	FALSE	hs|5q31.2	NA	NA	NA	NA	NA	NA	NA	NA	NA
MGEA5	3.02e-05	2.03354	14.1396	14.1116	14.0429	13.7458	14.0868	14.0906	13.4096	12.5804	12.5389	12.7501	13.4572	12.7717	13.0017	13.2983	Homo sapiens meningioma expressed antigen 5 (hyaluronidase) (MGEA5), transcript variant 1, mRNA [NM_012215]	GTGACTGTGAAACAGATGCCCTGGTCTTGCTTTCATCACTCTAGGATCATGAAGTGCTAT	chr10	103544335	103544394	-	FALSE	hs|10q24.32	ENST00000361464	10724	NM_012215	meningioma expressed antigen 5 (hyaluronidase)	GO:0060124|GO:0046060|GO:0010524|GO:0005634|GO:0005829|GO:0010616|GO:0051901|GO:0043243|GO:0006612|GO:0046326|GO:0032024|GO:0004402|GO:0016231|GO:0070265|GO:0051054|GO:0060051|GO:0016573|GO:0007568|GO:0006044|GO:0048545|GO:0045862|GO:0031343|GO:0016020|GO:0006517|GO:0006516|GO:0004415	NM_012215	THC2470155
ATF3	0.00388322	6.19793	6.05959	7.60587	3.94959	5.66071	5.63317	4.41487	4.78041	1.7976	3.12635	3.23931	2.78331	4.14675	2.4493	2.70819	Homo sapiens activating transcription factor 3 (ATF3), transcript variant 4, mRNA [NM_001040619]	TCCAGAAGATGAGAGAAACCTCTTTATCCAACAGATAAAAGAAGGAACATTGCAGAGCTA	chr1	212792837	212792896	+	FALSE	hs|1q32.3	ENST00000366983	467	NM_001040619	activating transcription factor 3	GO:0005515|GO:0008284|GO:0000977|GO:0003700|GO:0003714|GO:0005730|GO:0006094|GO:0005634|GO:0000122|GO:0035914|GO:0000978|GO:0001228|GO:0006351|GO:0042802|GO:0030968|GO:0001078|GO:0045944|GO:0005654|GO:0006987|GO:0044267	NM_001040619	THC2524525
EIF4E2	2.25e-07	0.448207	9.36876	9.55698	9.26785	9.58533	9.11563	9.25949	10.756	10.4241	10.212	10.5244	10.7455	10.3074	10.3375	10.7813	Homo sapiens eukaryotic translation initiation factor 4E family member 2 (EIF4E2), transcript variant 2, mRNA [NM_001282958]	CCAGGAAAAGTGTTCTGTTGGAGAGTCCCAAAATAGCTGTAAATGCTCTCTTCTAGCTCT	chr2	233446055	233446114	+	FALSE	hs|2q37.1	NA	9470	NM_001282958	eukaryotic translation initiation factor 4E family member 2	GO:0017148|GO:0005515|GO:0000339|GO:0019221|GO:0003743|GO:0001701|GO:0031625|GO:0008135|GO:0006413|GO:0005845|GO:0005829	NM_001282958	THC2580335
KIR2DL5A	0.000238758	0.275041	2.28451	2.40065	1.82496	2.98685	1.29416	2.29482	3.71715	3.79432	3.45717	4.25066	4.37194	5.41886	3.34851	3.29016	Homo sapiens killer cell immunoglobulin-like receptor, two domains, long cytoplasmic tail, 5A (KIR2DL5A), mRNA [NM_020535]	AACTCTTCAAGTAGTTCATCTTCACCCACTGAACCAAGCTCCAAAACTGGTATCCGCAGA	chr19_gl000209_random	91939	94763	+	FALSE	NA	ENST00000615969	57292	NM_020535	killer cell immunoglobulin-like receptor, two domains, long cytoplasmic tail, 5A	GO:0005886|GO:0016021	NM_020535	THC2489091
SLC22A7	0.00176682	0.456365	7.12021	7.02206	6.84565	6.91942	6.35542	6.93582	8.42359	8.06197	8.08067	8.44857	6.96595	8.48657	7.87684	6.94681	Homo sapiens solute carrier family 22 (organic anion transporter), member 7 (SLC22A7), transcript variant 2, mRNA [NM_153320]	AGTGAACTTCTCCTATTACGGCCTGAGTCTGGATGTGTCGGGGCTGGGGCTGAACGTGTA	chr6	43269944	43270003	+	FALSE	hs|6p21.1	ENST00000436107	10864	NM_153320	solute carrier family 22 (organic anion transporter), member 7	GO:0016323|GO:0035634|GO:0034220|GO:0016020|GO:0005886|GO:0015347|GO:0005887|GO:0015711|GO:0055085	NM_153320	NP302336
FAM118A	0.00710826	0.359903	7.01743	6.99572	6.45977	6.83113	6.19801	6.83787	7.63588	8.94218	7.9368	8.67656	7.69055	6.06216	9.07419	7.90119	Homo sapiens family with sequence similarity 118, member A (FAM118A), transcript variant 1, mRNA [NM_001104595]	CAGCTGGATCAAAAGGGCTTCTTTGGAATTAGGTTGTTTTAGTAACTTCTGTTCCAAAGA	chr22	45737113	45737172	+	FALSE	hs|22q13.31	ENST00000216214	55007	NM_001104595	family with sequence similarity 118, member A	GO:0016021	NM_001104595	THC2496653
GNB5	4.59e-05	2.47248	6.08384	5.88272	6.0243	6.57672	5.67029	6.53785	4.78845	4.38975	4.9989	5.03249	5.21636	4.70157	4.61651	4.9777	Homo sapiens guanine nucleotide binding protein (G protein), beta 5, mRNA (cDNA clone IMAGE:4131809), complete cds. [BC011671]	AATTTTAGCTCTTAATGAAAATAAGACCAAAACCTATGTGCAGGTATGCTGGAACACATG	chr15	52441516	52441575	-	FALSE	hs|15q21.2	NA	10681	BC011671	guanine nucleotide binding protein (G protein), beta 5	GO:0005515|GO:0007165|GO:0007603|GO:0005886|GO:0008152|GO:0051087|GO:0003924|GO:0022400|GO:0005634|GO:0004871|GO:0031682|GO:0016056	NA	THC2486134
LOC400756	0.00176372	2.10147	5.40323	5.5999	5.2748	5.71759	4.7598	5.6188	3.68184	3.55769	4.14745	4.13127	3.23931	5.08979	4.66889	5.13542	PREDICTED: Homo sapiens uncharacterized LOC400756 (RP11-230B22.1), misc_RNA [XR_159044]	ATTAATGGTGCTTTTTATTGTGCAAATCATACGACTAACCCATCATGTCCTTTCTGTGTC	chr1	63176144	63176203	+	FALSE	hs|1p31.3	NA	400756	XR_159044	uncharacterized LOC400756	NA	XR_159044	THC2684011
IGSF8	3.04e-06	3.33036	8.68004	7.95972	8.75828	7.87622	8.1919	8.22591	6.59567	6.92992	6.08362	6.19914	6.27131	6.67459	6.87452	6.80184	Homo sapiens immunoglobulin superfamily, member 8 (IGSF8), transcript variant 1, mRNA [NM_052868]	TACCATCACTTGCTGCTTCATGAAGAGGCTTCGAAAACGGTGATCCCTTACTCCCCAGGT	chr1	160061397	160061655	-	FALSE	hs|1q23.2	ENST00000614243	93185	NM_052868	immunoglobulin superfamily, member 8	GO:0005515|GO:0030424|GO:0005886|GO:0008283|GO:2000145|GO:0006928|GO:0045202|GO:0007399|GO:0007338|GO:0016020|GO:0007519|GO:0016021|GO:0070062	NM_052868	NP405327
nucleosome assembly protein 1-like 4 pseudogene 3 [Source:HGNC Symbol;Acc:HGNC:39738] [ENST00000432820]	0.00184244	0.0220067	4.65393	4.35324	4.50993	5.4746	4.66916	4.57559	10.3177	11.2937	10.7557	10.7675	4.33655	10.2309	10.3382	5.61388	CGAAACTGGTCACTTTTTACCTGAACGTATAATCTCAGGATCAGTGTTACACTTTACTGG	chr13	48338556	48338615	+	FALSE	hs|13q14.2	ENST00000432820	NA	NA	NA	NA	NA	NA	NA
CAGGGCTGGGAGAAGTGCTGCACAGGAGGCTGAGGGTTTCATTAGTATTTACCTAATGTC	0.00221855	0.422443	7.86856	8.09335	7.69858	7.26189	6.66581	7.65407	9.57462	8.91147	8.52603	9.18397	7.5465	8.32651	9.28473	8.53116	NA	NA	NA	NA	FALSE	NA	NA	NA	NA	NA	NA	NA	NA	NA	NA
CXorf36	0.0107019	0.410376	3.08177	3.16232	2.10346	3.98498	4.59008	2.89227	4.62917	3.96983	3.93717	4.33217	4.68504	5.58078	5.71247	4.49084	Homo sapiens chromosome X open reading frame 36 (CXorf36), transcript variant 2, mRNA [NM_024689]	TGGGTGTATCTGGTTTGAAATGAAACCTTATTTTATTGGAAATGGTTGGTTTCCCAATTC	chrX	45021808	45021867	-	FALSE	hs|Xp11.3	ENST00000377934	79742	NM_024689	chromosome X open reading frame 36	GO:0005576	NM_024689	THC2472399
BTG2	0.000355703	3.87951	13.491	14.2504	13.967	14.8922	13.631	12.7879	12.3854	11.8884	12.9718	11.0998	11.4575	11.2839	12.4188	11.666	Homo sapiens BTG family, member 2 (BTG2), mRNA [NM_006763]	TTTTAGAAGCAGCCTCATGGTCTCATGCTTAATCTTGTCTCTCTTCTCTTCTTTATGATG	chr1	203278454	203278513	+	FALSE	hs|1q32.1	ENST00000475157	7832	NM_006763	BTG family, member 2	GO:0005515|GO:0008306|GO:0017148|GO:0014070|GO:0021542|GO:2000178|GO:0008285|GO:0021954|GO:0060213|GO:0043434|GO:0035914|GO:0009952|GO:0031175|GO:0006351|GO:0006974|GO:0009612|GO:0043524|GO:0001077|GO:0006281|GO:0045944|GO:0051602|GO:0006479|GO:0070062	NM_006763	THC2559986
TAAATGAACTAATCTACAAGCGTGCTTATGGCAAAATCAATTTGACTTGCACTTTCCTAC	0.0023202	0.289106	12.3209	12.3934	11.8905	13.3036	11.6914	12.3665	14.1705	15.0812	14.7284	14.3596	11.9008	14.0698	14.3313	13.1747	NA	NA	NA	NA	FALSE	NA	NA	NA	NA	NA	NA	NA	NA	NA	NA
OR2H1	0.0146008	0.277124	11.1109	11.7771	11.6975	11.3207	11.7964	11.5274	13.7679	13.709	13.8612	13.5068	10.4259	13.3503	14.1705	11.5546	Homo sapiens olfactory receptor, family 2, subfamily H, member 1 (OR2H1), mRNA [NM_030883]	CATCCACCCTCCACTTGCCCTTCTGTCCCCACCAGCAGATAGATGACTTTTTATGTGAGG	chr6	29430022	29430081	+	FALSE	hs|6p22.1	ENST00000461453	26716	NM_030883	olfactory receptor, family 2, subfamily H, member 1	GO:0050911|GO:0004984|GO:0007186|GO:0005886|GO:0004930|GO:0016021	NM_030883	THC2734737
RTKN2	0.0132135	0.359702	4.5752	4.78845	5.71043	4.72094	6.5879	6.62062	7.99524	5.99196	6.04709	6.03383	6.53001	7.83001	7.75005	7.77016	Homo sapiens rhotekin 2 (RTKN2), transcript variant 1, mRNA [NM_145307]	GATCACGACGCTATGCCATTTTTTGTTTATTCAAAATGGGAGCTAATGTGTTTGATACTG	chr10	63999465	63999524	-	FALSE	hs|10q21.2	ENST00000395260	219790	NM_145307	rhotekin 2	GO:0030097|GO:0007165|GO:0008284|GO:0005886	NM_145307	THC2609796
EIF2S1	3.94e-06	0.453093	7.08016	7.35635	7.08409	7.45433	7.37179	7.17981	8.42235	8.64484	8.35589	8.77927	8.41053	7.68615	8.30453	8.39713	Homo sapiens eukaryotic translation initiation factor 2, subunit 1 alpha, 35kDa (EIF2S1), mRNA [NM_004094]	CCATTTATGAAGGTTTGTTCCTTTGTTAAATTTAGCAGCCTGTACTAGCTTTTGAAATCC	chr14	67851409	67851468	+	FALSE	hs|14q23.3	ENST00000256383	1965	NM_004094	eukaryotic translation initiation factor 2, subunit 1 alpha, 35kDa	GO:0005515|GO:0005851|GO:0005850|GO:0010467|GO:0010494|GO:0003743|GO:0005634|GO:0006412|GO:0006413|GO:0030968|GO:0005829|GO:0043558|GO:0046777|GO:0016020|GO:0043022|GO:0006987|GO:0044267|GO:0005844|GO:0070062	NM_004094	THC2469373
TFPI2	0.00125153	6.30109	9.73663	10.2322	10.2283	10.0642	11.551	9.2219	3.69042	3.45975	8.53139	3.30212	5.27151	10.0981	6.80467	4.72278	Homo sapiens tissue factor pathway inhibitor 2 (TFPI2), transcript variant 1, mRNA [NM_006528]	CTGTGGAGGGAATGACAATAACTTTGTTAGCAGGGAGGATTGCAAACGTGCATGTGCAAA	chr7	93516575	93516634	-	FALSE	hs|7q21.3	ENST00000222543	7980	NM_006528	tissue factor pathway inhibitor 2	GO:0010951|GO:0007596|GO:0004867|GO:0005578|GO:0005634|GO:0005201	NM_006528	NP1186420
RC1=NADH dehydrogenase subunit 3 homolog/ND3 homolog [human, renal cell carcinoma, mRNA Mitochondrial Partial, 65 nt]. [S81524]	0.0124094	0.312492	5.82029	5.58928	5.58573	5.81297	4.94145	5.26042	7.20464	5.7547	6.89013	7.29178	6.175	8.97379	6.44488	5.55439	TCGGCACGAGGTTCAGTCTAATCCTTTTTGTAGTCACTCATAGGCCAGACTTAACCGAAT	chrM	10351	10410	-	FALSE	NA	NA	NA	S81524	NA	NA	NA	NA	NA
lnc-DBN1-2	0.00409664	2.4717	9.14625	8.94859	9.10717	8.67171	8.92801	8.82487	6.96792	6.56459	8.28092	8.00049	8.87255	5.28639	7.08308	7.38155	LNCipedia lincRNA (lnc-DBN1-2), lincRNA [lnc-DBN1-2:2]	AACATTTGGGGTTGAAGTGACAGAACTCCCAAACAAATAGGTTTGAGCTGTACCCCGTCT	chr5	176873000	176873059	-	FALSE	hs|5q35.3	NA	NA	NA	lnc-DBN1-2:2	NA	NA	NA
2018-09-12	0.000266819	0.470011	6.68123	6.12064	6.61667	5.81321	5.95271	6.25371	7.76997	7.93391	7.08704	7.20754	7.09677	6.98953	6.71009	7.66782	Homo sapiens septin 12 (SEPT12), transcript variant 2, mRNA [NM_144605]	TGCTGGGCTTCCTGAGTCCCCAGCGGCTCTCAACACACACCTATGTACCAGAGCATCTAT	chr16	4827718	4827777	-	FALSE	hs|16p13.3	ENST00000587603	124404	NM_144605	septin 12	GO:0005515|GO:0031105|GO:0001725|GO:0048471|GO:0097227|GO:0005819|GO:0030496|GO:0005525|GO:0032154|GO:0042803|GO:0007049|GO:0015630|GO:0019003|GO:0035091|GO:0051301	NM_144605	NP1153851
LOC100505912	0.00054962	4.02734	4.64923	5.82822	4.86508	5.3981	5.42448	5.55826	2.6157	3.77182	2.73458	3.30652	3.62574	0.560641	4.32405	3.3728	Homo sapiens uncharacterized LOC100505912 (LOC100505912), long non-coding RNA [NR_037877]	GGAAAGAACTGAAAGATGACACTAGGAATTCTCAAAGCGAGAGGAAAAGGAAAGGCCCTT	chr4	22329389	22329448	-	FALSE	hs|4p15.2	NA	100505912	NA	uncharacterized LOC100505912	NA	NR_037877	THC2609780
SLC16A3	0.0234922	2.1944	11.6518	11.1319	10.8869	10.202	12.4464	10.4145	9.62757	8.68992	8.87345	8.91892	10.2827	11.8521	10.3311	9.99107	Homo sapiens solute carrier family 16 (monocarboxylate transporter), member 3 (SLC16A3), transcript variant 2, mRNA [NM_001042422]	GTCTTGGGGACAGCTCTTTCCACCCCTGGAAGATGGAAATAAACCTGCGTGTGGGTGGAG	chr17	80197288	80197347	+	FALSE	hs|17q25.3	ENST00000582743	9123	NM_001042422	solute carrier family 16 (monocarboxylate transporter), member 3	GO:0031965|GO:0005886|GO:0008028|GO:0044281|GO:0015129|GO:0050900|GO:0015629|GO:0055085|GO:0015718|GO:0016020|GO:0035879|GO:0005887|GO:0006090|GO:0007596|GO:0015355|GO:0044237|GO:0015293	NM_001042422	THC2504778
CTNND1	0.000372811	2.42353	10.8883	10.9797	10.5114	10.9291	10.7514	11.0443	8.46193	10.0449	10.0977	9.70961	9.68512	8.46989	9.84355	9.45354	Homo sapiens catenin (cadherin-associated protein), delta 1 (CTNND1), transcript variant 3, mRNA [NM_001331]	TAGAAACTACCAATCCCAACTACGTAATAGGAAAATGTAGGATCAAAAGGCCCATGTATA	chr11	57586315	57586374	+	FALSE	hs|11q12.1	ENST00000399050	1500	NM_001331	catenin (cadherin-associated protein), delta 1	GO:0005515|GO:0005886|GO:0045202|GO:0005634|GO:0005829|GO:0030426|GO:0005915|GO:0005737|GO:0016337|GO:0043197|GO:0005911|GO:0016055|GO:0007155|GO:0090090|GO:0070062|GO:0048010|GO:0006355|GO:0045296|GO:0019901|GO:0034329|GO:0005102|GO:0030496|GO:0006351|GO:0030027|GO:0045216|GO:0007420|GO:0034332	NM_001331	THC2676464
SEMA6A	3.48e-05	4.26914	9.39153	8.77544	9.58085	9.0902	9.86669	9.23355	6.87293	6.23037	5.72637	7.50565	7.75452	7.98495	7.77054	6.919	Homo sapiens sema domain, transmembrane domain (TM), and cytoplasmic domain, (semaphorin) 6A (SEMA6A), transcript variant 2, mRNA [NM_020796]	TGAACAGAAACTGAAACATTTGTCCACAACTTCCACGGGACGTGGCCAGACTGGGTTTGC	chr5	115779232	115779258	-	FALSE	hs|5q23.1	ENST00000513137	57556	NM_020796	sema domain, transmembrane domain (TM), and cytoplasmic domain, (semaphorin) 6A	GO:0005515|GO:0030424|GO:0005886|GO:0007411|GO:0007010|GO:0009887|GO:0006915|GO:0004872|GO:0016021|GO:0007166|GO:0007399	NM_020796	THC2496422
GATTTGTTCCAGTGTTGGAGCCCTTTTTAATGAAAATTCTCAACACCTACACTGGAAAAA	2.88e-06	4.50462	10.9977	10.6694	11.2214	10.2334	10.3984	10.2706	7.66822	8.56428	7.81217	8.29327	8.38127	7.93525	9.28685	9.20996	chr9	571370	571429	+	FALSE	hs|9p24.3	NA	NA	NA	NA	NA	NA	THC2663555	NA	NA
DGKE	0.00381207	0.494962	9.49891	10.4114	9.69306	9.99824	9.68138	9.7836	10.9395	10.6702	10.734	11.0117	11.7092	9.50591	10.5883	11.1115	Homo sapiens diacylglycerol kinase, epsilon 64kDa (DGKE), mRNA [NM_003647]	TTTTTTGGTGGACAGAATATTTTGGAGGTCTCCGTCGCTGTTTAGAATGTGGCCACTTGG	chr17	54944280	54944339	+	FALSE	hs|17q22	ENST00000284061	8526	NM_003647	diacylglycerol kinase, epsilon 64kDa	GO:0005886|GO:0030168|GO:0008654|GO:0005524|GO:0046872|GO:0007205|GO:0035556|GO:0016310|GO:0005737|GO:0003951|GO:0016020|GO:0007596|GO:0004143|GO:0016021	NM_003647	THC2560234
ACTG1	0.000315342	2.62277	14.1332	14.0406	14.0831	14.3608	14.4999	14.2579	13.066	13.0689	11.6084	11.8778	12.929	12.4354	13.7037	13.0056	Homo sapiens actin gamma 1 (ACTG1), transcript variant 2, mRNA [NM_001614]	CACGAATCTGGAATAAGCCTTCGAAAAGAAATTGTCCTTGAAGCTAGTATCTGATATCAG	chr17	79477566	79477625	-	FALSE	hs|17q25.3	ENST00000594933	71	NM_001614	actin gamma 1	GO:0005515|GO:0005886|GO:0006928|GO:0072562|GO:0005634|GO:0030016|GO:0005615|GO:0005829|GO:0042802|GO:0007411|GO:0001895|GO:0061024|GO:0005856|GO:0031625|GO:0070062|GO:0048010|GO:0048013|GO:0034329|GO:0045214|GO:0005524|GO:0045216|GO:0070527|GO:0031941|GO:0016020|GO:0045087|GO:0005200|GO:0038096|GO:0034332	NM_001614	THC2565671
LINC00950	1.18e-05	3.20726	8.50902	8.18899	7.84669	7.28275	7.82013	7.91702	6.11195	5.90571	6.8662	6.2392	6.49354	5.46499	6.10266	6.6909	Homo sapiens long intergenic non-protein coding RNA 950 (LINC00950), long non-coding RNA [NR_024006]	AGACACCGAGTACAGGCGAGGGACTTTATTAGGTCAGGGATTTAATCAGGCATCTGTTTT	chr9	35865315	35865374	+	FALSE	hs|9p13.3	NA	92973	NR_024006	long intergenic non-protein coding RNA 950	NA	NR_024006	THC2601269
TGTGAGGTGAATCTCAACATGTCCACAGATTAGGTAAAGATCAAACAATTGAGTAGCTTT	0.0084307	2.82892	3.72367	3.15273	4.22565	3.41662	5.43554	4.44814	1.80015	3.16859	2.93745	2.63578	4.04859	0.483321	2.73527	2.00009	chr11	71570273	71570332	-	FALSE	hs|11q13.4	NA	NA	NA	NA	NA	NA	THC2672351	NA	NA
HS3ST3B1	0.00396849	3.27066	5.67002	5.24241	5.40632	6.13781	5.42577	5.0244	3.09055	0.876926	0.945301	2.23344	3.79098	4.01303	4.03661	5.63208	Homo sapiens heparan sulfate (glucosamine) 3-O-sulfotransferase 3B1 (HS3ST3B1), transcript variant 1, mRNA [NM_006041]	TTGCGGTGTTTGAACAGTAGTCTGTTAACTTAGTAGGTGGTACCTGGAAAGGTATTTTAA	chr17	14252127	14252186	+	FALSE	hs|17p12	ENST00000360954	9953	NM_006041	heparan sulfate (glucosamine) 3-O-sulfotransferase 3B1	GO:0000139|GO:0005975|GO:0005887|GO:0033872|GO:0009405|GO:0044281|GO:0015012|GO:0008467|GO:0030203|GO:0015015|GO:0006024	NM_006041	THC2521126
TXNL4A	3.36e-06	0.449717	11.1996	11.8353	11.2131	11.5833	11.2976	11.4662	12.742	12.5581	12.9762	12.7832	12.4847	12.1844	12.5754	12.3762	thioredoxin-like 4A [Source:HGNC Symbol;Acc:HGNC:30551] [ENST00000355491]	ATCGCCGAGAAGGTTAAAAATTTTGCAGTTATTTATCTTGTGGATATTACAGAAGTGCCT	chr18	77737654	77748251	-	FALSE	hs|18q23	ENST00000355491	10907	AK314901	thioredoxin-like 4A	GO:0008380|GO:0005515|GO:0010467|GO:0000245|GO:0007067|GO:0000398|GO:0000375|GO:0005681|GO:0005654|GO:0005682|GO:0046540|GO:0051301	NA	THC2486194
RBP5	0.0155217	2.89485	6.12554	8.87856	6.80956	7.16836	6.86303	7.08353	5.56052	5.11012	6.06523	5.36911	6.20288	6.49354	5.68138	6.28236	Homo sapiens retinol binding protein 5, cellular (RBP5), mRNA [NM_031491]	GAGGACGCTCAGCACCTTCCGAAACTACACTGTGCAGTTTGATGTGGGAGTGGAGTTTGA	chr12	7280873	7280932	-	FALSE	hs|12p13.31	ENST00000543045	83758	NM_031491	retinol binding protein 5, cellular	GO:0005215|GO:0005737|GO:0016918|GO:0006810|GO:0005501|GO:0019841|GO:0070062	NM_031491	THC2552974
OR1D2	8.46e-05	0.189499	6.0703	6.12863	6.52952	6.0342	5.75367	6.1502	9.0462	9.00067	8.71594	8.71501	6.90347	8.8192	8.52587	7.06563	Homo sapiens olfactory receptor, family 1, subfamily D, member 2 (OR1D2), mRNA [NM_002548]	CAGGCTGCTTCATCTTCCTCATTCCCTTTGGATTCGTGATCATTTCCTATGTGCTGATTA	chr17	2995627	2995686	-	FALSE	hs|17p13.3	ENST00000331459	4991	NM_002548	olfactory receptor, family 1, subfamily D, member 2	GO:0007338|GO:0050911|GO:0007608|GO:0004984|GO:0007186|GO:0006935|GO:0005886|GO:0005887|GO:0004930|GO:0006928|GO:0016021|GO:0000060	NM_002548	THC2603232
keratin 8 pseudogene 37 [Source:HGNC Symbol;Acc:HGNC:39871] [ENST00000451609]	6.69e-05	4.12583	8.37829	8.42251	8.1562	7.38813	8.25242	7.32839	5.56957	4.34466	6.11436	5.66336	7.21241	5.16101	5.98111	6.3257	GTAGAGCTGGAGTCTCGCCTGGAAGGGCTGACTGAGATCAACTTCCTCAGGCAGCTGTAT	chr10	8556417	8556476	-	FALSE	hs|10p14	ENST00000451609	NA	NA	NA	NA	NA	NA	NA
TACAGAGCCTTATTCAATTATACTACCAATGTAATCCTATTGCACTGCTCAACAGAATCA	0.000976598	4.34951	9.33735	8.36952	9.35463	8.04432	8.73071	8.55058	7.69488	6.86178	7.3333	4.08443	4.2933	6.32044	7.00196	6.60037	chr5	58442491	58442550	-	FALSE	hs|5q11.2	NA	NA	NA	NA	NA	NA	THC2645562	NA	NA
SBK2	0.00705792	0.300717	7.84749	7.77722	7.91861	7.92869	7.95782	7.85862	10.1975	10.2378	9.69857	9.30827	7.39986	10.3416	9.47934	7.97491	Homo sapiens SH3 domain binding kinase family, member 2 (SBK2), mRNA [NM_001101401]	CCCAGCTGGCCTCCGCCCTGGAGTACATCCACGCCCGCGGCCTGGTGTACCGGGACCTGA	chr19	56041594	56041653	-	FALSE	hs|19q13.42	ENST00000344158	646643	NM_001101401	SH3 domain binding kinase family, member 2	GO:0035556|GO:0023014|GO:0000187|GO:0005737|GO:0004702|GO:0000165|GO:0006468|GO:0005524|GO:0004708	NM_001101401	THC2663623
TRPM6	0.0101712	2.33567	8.03551	7.57038	6.70326	6.67898	7.38695	5.99377	5.53787	6.33101	6.60037	6.60841	4.93921	5.28461	6.16957	5.49116	Homo sapiens transient receptor potential cation channel, subfamily M, member 6 (TRPM6), transcript variant a, mRNA [NM_017662]	TGCCCAATTGCCAAACTAAAGACATCAGTTCATTGGTCAAATATTTGTTACCTGGAATGG	chr9	77337446	77337505	-	FALSE	hs|9q21.13	ENST00000360774	140803	NM_017662	transient receptor potential cation channel, subfamily M, member 6	GO:0005515|GO:0005262|GO:0005886|GO:0009636|GO:0031526|GO:0005524|GO:0055085|GO:0046872|GO:0016324|GO:0034220|GO:0004674|GO:0070588|GO:0006468|GO:0016021	NM_017662	THC2471399
LINC00623	0.00118674	2.0128	9.81029	9.26481	10.1627	10.4602	9.99751	9.73443	8.92293	9.19024	9.05226	9.44798	9.08271	9.0977	8.04145	8.14854	PREDICTED: Homo sapiens long intergenic non-protein coding RNA 623 (LINC00623), ncRNA [XR_426752]	AGCTGACAGAGATCCTTGTCAGAAAACTTGCCACAGAATCAACCCCAATGCTCACTAACA	chr1	149632656	149636146	+	FALSE	hs|1q21.2	NA	728855	XR_426752	long intergenic non-protein coding RNA 623	NA	XR_426752	THC2518705
PTPN21	5.52e-05	2.7715	7.70299	8.05139	8.07805	8.26709	7.87459	7.66116	5.46701	5.94749	6.70892	6.10242	7.40134	6.36897	6.23259	6.78392	Homo sapiens protein tyrosine phosphatase, non-receptor type 21 (PTPN21), mRNA [NM_007039]	TTACTGAAGCTATGCTGGGCAATTCTGGCAATCATTAAAGTGCATAGATTTCTATCTTAA	chr14	88934115	88934174	-	FALSE	hs|14q31.3	ENST00000556564	11099	NM_007039	protein tyrosine phosphatase, non-receptor type 21	GO:0005515|GO:0005737|GO:0006470|GO:0005856|GO:0035335|GO:0004725	NM_007039	THC2604260
AMOTL1	0.0115348	3.3085	7.1219	6.23703	8.32742	5.50812	6.45648	5.97291	4.29903	4.77134	4.96449	5.45202	5.43852	4.15092	5.98932	5.59626	Homo sapiens mRNA for FLJ00155 protein. [AK074084]	AAATCAGAAGCAATGAAATTCCTTTCTTAAAGTTCTGTGTTGTCAAAATAAAAGAAGCTT	chr11	94611277	94611336	+	FALSE	hs|11q21	NA	154810	AK074084	angiomotin like 1	GO:0005515|GO:0003365|GO:0030054|GO:0031410|GO:0035329|GO:0030027|GO:0005829|GO:0042802|GO:0043536|GO:0005737|GO:0016324|GO:0008180|GO:0005923|GO:0016055	NA	THC2464918
TTGCAGATAAGTTTTTGGATGTGCTTCCAGCATTTTGTCCGTTGGCAGTAAATCAGTTGT	0.00185536	2.5048	5.98269	5.38433	5.32821	4.44872	5.57056	5.17464	4.26259	4.29639	4.95871	4.60445	2.3109	3.52084	3.45411	3.55602	chr2	154336109	154336168	+	FALSE	hs|2q23.3	NA	NA	NA	NA	NA	NA	NA	NA	NA
P2RX2	0.00958803	0.394572	8.05558	7.86511	8.03289	7.94439	8.03516	7.97893	9.98649	9.63739	9.44115	9.30147	7.5032	9.7182	9.54689	7.87349	Homo sapiens purinergic receptor P2X, ligand gated ion channel, 2 (P2RX2), transcript variant 4, mRNA [NM_170683]	AGGGCTCCTTCCTGTGCGACTGGATCTTGCTAACATTCATGAACAAAAACAAGGTCTACA	chr12	133198203	133198262	+	FALSE	hs|12q24.33	ENST00000343948	22953	NM_170683	purinergic receptor P2X, ligand gated ion channel, 2	GO:0007605|GO:0010524|GO:0046870|GO:0051291|GO:0019228|GO:0050850|GO:0042802|GO:0005639|GO:0009743|GO:0016324|GO:0050909|GO:0043197|GO:0007528|GO:0043195|GO:0008144|GO:0043025|GO:0001614|GO:0033198|GO:0051260|GO:0014832|GO:0015276|GO:0016151|GO:0035590|GO:0001666|GO:0004931|GO:0009986|GO:0005507|GO:0048741|GO:0014069|GO:0007274|GO:0005524|GO:0003029|GO:0030432|GO:0045340|GO:0043235|GO:0042734|GO:…	NM_170683	NP1457348
ABCG2	0.0108109	2.82672	10.7541	10.6495	11.3693	13.0133	12.3654	11.3461	9.9896	8.47597	8.95947	9.28563	9.86107	11.9841	11.0207	9.78688	Homo sapiens ATP-binding cassette, sub-family G (WHITE), member 2 (Junior blood group) (ABCG2), transcript variant 1, mRNA [NM_004827]	CTGGGGCTTGTGGAAGAATCACGTGGCCTTGGCTTGTATGATTGTTATTTTCCTCACAAT	chr4	89013426	89013485	-	FALSE	hs|4q22.1	ENST00000237612	9429	NM_004827	ATP-binding cassette, sub-family G (WHITE), member 2 (Junior blood group)	GO:0005515|GO:0005215|GO:0015886|GO:0031966|GO:0005886|GO:0015232|GO:0042493|GO:0042626|GO:0042908|GO:0005634|GO:0044281|GO:0046415|GO:0055085|GO:0005524|GO:0042803|GO:0006879|GO:0008559|GO:0006855|GO:0006810|GO:0005654|GO:0016021	NM_004827	THC2489150
EPPK1	0.000736651	2.32753	7.32605	7.03041	7.23834	7.07716	6.99735	7.37206	6.67968	5.3155	5.43796	5.66276	4.97821	5.22242	6.75672	6.41629	Homo sapiens EPPK1 mRNA for epiplakin 1, complete cds. [AB051895]	GTTTTTTGGTGTGTTTTCTGGGTCGTCTATGTGTCATATGGTTTTACTTTTCTCCCGGAA	chr8	144939906	144939965	-	FALSE	hs|8q24.3	NA	83481	AB051895	epiplakin 1	GO:0008150|GO:0005737|GO:0005856	NA	THC2477060
STOX1	7.07e-05	2.40923	9.88158	9.53894	9.88443	9.96679	10.0912	10.3858	8.5785	8.85685	8.11082	8.19646	8.14702	8.38822	9.52521	9.18915	Homo sapiens storkhead box 1 (STOX1), transcript variant 1, mRNA [NM_152709]	AAGAAGACAGAATTTTCTGCAAAATGTCGAAGGCACAAAGAGCAGTCAACCACTCACATC	chr10	70652393	70652452	+	FALSE	hs|10q22.1	ENST00000399169	219736	NM_152709	storkhead box 1	GO:0005737|GO:0005730|GO:0005654|GO:0005634|GO:0003677	NM_152709	NP1400346
GATTATTTCCCTTCCTTCCTTATAATAACTAATGGCCTAATTCTAATTCTTAAAAGTATT	0.000447938	0.345687	6.62459	6.3708	7.16737	6.64251	7.03433	6.91363	8.76395	8.77747	8.82468	8.38452	6.89854	7.76778	8.68234	7.65082	chr5	58947483	58947542	+	FALSE	hs|5q12.1	NA	NA	NA	NA	NA	NA	THC2678309	NA	NA
FCN2	1.63e-05	45.1436	6.65908	8.6642	9.08293	5.91214	8.97822	7.83646	2.66893	1.85601	2.28373	2.9942	0.600661	3.09751	3.90166	2.71592	Homo sapiens ficolin (collagen/fibrinogen domain containing lectin) 2 (FCN2), transcript variant SV0, mRNA [NM_004108]	GGACTCATGGCAGCTTTGCAAATGGCATCAACTGGAAGTCGGGGAAAGGATACAATTATA	chr9	137779164	137779223	+	FALSE	hs|9q34.3	ENST00000291744	2220	NM_004108	ficolin (collagen/fibrinogen domain containing lectin) 2	GO:0005515|GO:0005581|GO:0050830|GO:0043394|GO:0072562|GO:0005576|GO:0043654|GO:0003823|GO:0001867|GO:0006956|GO:0050829|GO:0045087|GO:2001065|GO:0008228|GO:0070062|GO:0048306	NM_004108	NP214832
SPTB	0.000535243	7.03314	12.4536	12.3923	12.7218	12.513	12.5907	12.9399	7.39682	7.29303	9.99085	9.88991	7.02228	10.7811	10.7678	10.2356	Homo sapiens spectrin, beta, erythrocytic (SPTB), transcript variant 1, mRNA [NM_001024858]	ACCTGCTCAACCGTGCTTCCACCAACCAGAGGAAACCCATTTACTAGTTTTTCTAATAAA	chr14	65213015	65213074	-	FALSE	hs|14q23.3	ENST00000389722	6710	NM_001024858	spectrin, beta, erythrocytic	GO:0005515|GO:0007009|GO:0030097|GO:0008091|GO:0046982|GO:0009986|GO:0031235|GO:0030506|GO:0003779|GO:0014731|GO:0015629|GO:0051693|GO:0005829|GO:0043234|GO:0005737|GO:0051015|GO:0006779|GO:0007411|GO:0005200	NM_001024858	THC2475546
PRPS2	0.00124952	0.413517	4.83171	4.26751	4.16681	4.36893	5.14959	4.09848	6.14358	6.15159	6.07798	5.54554	5.24466	4.63677	5.1324	6.55809	Homo sapiens phosphoribosyl pyrophosphate synthetase 2 (PRPS2), transcript variant 1, mRNA [NM_001039091]	TCATTGTGGAAGTCATAGTTTATATATTTCGAGGTTGCCAAAGGTGACTTCAGATTAAAG	chrX	12841243	12841302	+	FALSE	hs|Xp22.2	ENST00000380668	5634	NM_001039091	phosphoribosyl pyrophosphate synthetase 2	GO:0000287|GO:0016208|GO:0031100|GO:0005524|GO:0042803|GO:0016310|GO:0006139|GO:0006167|GO:0043531|GO:0016301|GO:0004749|GO:0006015|GO:0030246|GO:0002189|GO:0019003|GO:0070062	NM_001039091	THC2466555
TRIM71	0.000496961	0.317565	7.22867	6.99399	7.71532	7.57111	7.59477	8.57259	9.46054	9.20728	7.81718	9.9894	9.64594	8.60687	9.05998	9.95622	tripartite motif containing 71, E3 ubiquitin protein ligase [Source:HGNC Symbol;Acc:HGNC:32669] [ENST00000383763]	AAGTGTTCAAAAACTCCTGTGTTAGCTAACAGGCTTCTGAATGTATCACTGTGGTCCACA	chr3	32939111	32939170	+	FALSE	hs|3p22.3	ENST00000383763	131405	BM928667	tripartite motif containing 71, E3 ubiquitin protein ligase	GO:2000177|GO:0004842|GO:0016874|GO:2000637|GO:0072089|GO:0001843|GO:0010586|GO:0051865|GO:0060964|GO:0035278|GO:0000082|GO:0035198|GO:0000932|GO:0008543|GO:0021915|GO:0008270	NA	THC2615092
[truncated: 5,236 more rows]

## Sheet: supplementary table 5
The target proteins of hsa-miR-320a and hsa-miR-423-5p by proteomic analysis of somatotroph adenomas and healthy pituitary samples
N	Unused	Total	%Cov	%Cov(50)	%Cov(95)	Accession				Peptides(95%)	118:117	PVal 118:117	EF 118:117	LowerCI 118:117	UpperCI 118:117
760	19.36	19.48	42.04	40.76	40.76	sp	Q14894	CRYM	HUMAN	12	0.0183654	2.27526e-10	1.5417	0.0147231	0.0283139
388	29.99	38.41	65.75	38.86	34.81	sp	P07196	NFL	HUMAN	26	0.0192309	0.000163067	1.47231	0.0147231	0.0283139
1037	15.39	15.57	66.99	62.14	57.28	sp	P62805	H4	HUMAN	12	0.0197697	0.00231279	2.39883	0.0120226	0.0474242
[truncated: 549 more rows]
